# Supplementary material for: Fetal Liver-Restricted Leukemic Proliferation Via GATA1s-CSF2RB-MPL Axis In Down Syndrome
Source: Research Square preprint supplement (doi:10.21203/rs.3.rs-7842540/v1), 2025-10-21
Supplement: Supplementary file 1 [file f24a2a4a49e4b906f6bb5ff0.xlsx]

## Sheet: Table S1
Table S1. Patient Samples
ID	Samples	Source	Condition	assay	GATA1s VAF	GATA1 Variant	Main Figure	Supplementary Figure	Notes
NHBT	CB1	Cord blood Cryopreserved MNCs	Disomic	scRNAseq, CSF2RB expression	Not screened	NA	1A-D;2A-E	S1,S3E	Cells passed scRNAseq QC:4920
NHBT	CB2	Cord blood Cryopreserved MNCs	Disomic	scRNAseq, CSF2RB expression	Not screened	NA	1A-D;2A-E	S1,S3E	Cells passed scRNAseq QC:7400
NHBT	CB3	Cord blood Cryopreserved MNCs	Disomic	scRNAseq, CSF2RB expression	Not screened	NA	1A-D;2A-E	S1,S3E	Cells passed scRNAseq QC:5747
OX2794	CB1	Cord blood Cryopreserved MNCs	Trisomy 21	scRNAseq, CSF2RB expression	Not detected	NA	1A-D;2A-E	S1,S2	Cells passed scRNAseq QC:4871
OX3252	CB2	Cord blood Cryopreserved MNCs	Trisomy 21	scRNAseq, CSF2RB expression	Not detected	NA	1A-D;2A-E	S1,S2	Cells passed scRNAseq QC:5918
OX3256	CB3	Cord blood Cryopreserved MNCs	Trisomy 21	scRNAseq, CSF2RB expression	Not detected	NA	1A-D;2A-E	S1,S2	Cells passed scRNAseq QC:4195
OX3461	CB4	Cord blood Cryopreserved MNCs	Trisomy 21	scRNAseq, CSF2RB expression	Not detected	NA	1A-D;2A-E	S1,S2	Cells passed scRNAseq QC:5169
OX1738	CB1	Cord blood Cryopreserved MNCs	TAM	scRNAseq, CSF2RB expression	0.038	1) c.54-55del : p.V19fs	1A-D;2A-E	S1,S2	Cells passed scRNAseq QC:2525
OX2886	CB2	Cord blood Cryopreserved MNCs	TAM	scRNAseq, CSF2RB expression	0.027	1) c.220+1G>C (exon 2 splice donor)	1A-D;2A-E	S1,S2	Cells passed scRNAseq QC:3086
OX3249	CB3	Cord blood Cryopreserved MNCs	TAM	scRNAseq, CSF2RB expression	0.01	1) c.105_106insG: p.S36fs	1A-D;2A-E	S1,S2	Cells passed scRNAseq QC:915
OX2368	CB4	Cord blood Cryopreserved MNCs	TAM	CSF2RB expression	0.126	1) c.199G>T : p.E67*	2A-E	NA	No comment
NHBT	CB4	Cord blood Cryopreserved MNCs	Disomic	alpha chain co-expression , IL2RG expression	Not screened	NA	4B-C, 4H	S3D-E	No comment
NHBT	CB5	Cord blood Cryopreserved MNCs	Disomic	alpha chain co-expression , IL2RG expression	Not screened	NA	4B-C, 4H	S3D-E	No comment
NHBT	CB6	Cord blood Cryopreserved MNCs	Disomic	alpha chain co-expression , IL2RG expression	Not screened	NA	4B-C, 4H	S3D-E	No comment
OX2341	CB5	Cord blood Cryopreserved MNCs	Trisomy 21	alpha chain co-expression , IL2RG expression	Not detected	NA	4B-C, 4H	S3D-E	No comment
OX3272	CB6	Cord blood Cryopreserved MNCs	Trisomy 21	alpha chain co-expression , IL2RG expression	Not detected	NA	4B-C, 4H	S3D-E	No comment
OX3401	CB7	Cord blood Cryopreserved MNCs	Trisomy 21	alpha chain co-expression , IL2RG expression	Not detected	NA	4B-C, 4H	S3D-E	No comment
353-01	PB1	Peripheral Blood Cryopreserved MNCs	TAM	alpha chain co-expression , IL2RG expression	1) 77.8%; 2) 4.12%	1) c.A1G:p.M1V; 2) c.36dupA:p.S12fs	4B-C, 4H	S3D-E	Sex: Male
371-01	PB2	Peripheral Blood Cryopreserved MNCs	TAM	alpha chain co-expression , IL2RG expression	1) 60.02%	1) c.1-22:C>G	4B-C, 4H	S3D-E	Sex: Male,
262-01	PB3	Peripheral Blood Cryopreserved MNCs	TAM	alpha chain co-expression , IL2RG expression	1) 15.32%; 2) 21.32%; 3) 1.83%	1) c.36_37del:p.S12fs ; 2) c.45dupC:p.L15fs; 3) c.220+1G>T (exon 2 splice donor)	4B-C, 4H	S3D-E	Sex: Male
OX2841	CB8	Cord blood Cryopreserved MNCs	Trisomy 21	RNP AAVS1, RNP GATA1 Exon 2, iFC; 0 and 10ng/ml TPO	Not detected	NA	4I-L	S7A-F	No comment
OX3930	CB9	Cord blood Cryopreserved MNCs	Trisomy 21	RNP AAVS1, RNP GATA1 Exon 2, iFC; 0 and 10ng/ml TPO	Not detected	NA	4I-L	S7A-F	No comment
OX2207	CB10	Cord blood Cryopreserved MNCs	Trisomy 21	RNP AAVS1, RNP GATA1 Exon 2, iFC; 0 and 10ng/ml TPO	Not detected	NA	4I-L	S7A-F	No comment
OX3272	CB11	Cord blood Cryopreserved MNCs	Trisomy 21	RNP AAVS1, RNP GATA1 Exon 2, iFC; 0 and 10ng/ml TPO	Not detected	NA	4I-L	S7A-F	No comment
OX2841	CB8	Cord blood Cryopreserved MNCs	Trisomy 21	RNP AAVS1, RNP GATA1 Exon 2, iFC; 0 to 10ng/ml TPO	Not detected	NA	5A-B	S7I-J	No comment
OX3930	CB9	Cord blood Cryopreserved MNCs	Trisomy 21	RNP AAVS1, RNP GATA1 Exon 2, iFC; 0 to 10ng/ml TPO	Not detected	NA	5A-B	S7I-J	No comment
OX2207	CB10	Cord blood Cryopreserved MNCs	Trisomy 21	RNP AAVS1, RNP GATA1 Exon 2, iFC; 0 to 10ng/ml TPO	Not detected	NA	5A-B	S7I-J	No comment
BIR732	CB11	Cord blood Cryopreserved MNCs	Trisomy 21	RNP AAVS1, RNP GATA1 Exon 2, phospho-iFC; 0 to 300ng/ml TPO	Not detected	NA	5D-E	S9A-C	No comment
OX2830	CB12	Cord blood Cryopreserved MNCs	Trisomy 21	RNP AAVS1, RNP GATA1 Exon 2, phospho-iFC; 0 to 300ng/ml TPO	Not detected	NA	5D-E	S9A-C	No comment
OX3969	CB13	Cord blood Cryopreserved MNCs	Trisomy 21	RNP AAVS1, RNP GATA1 Exon 2, phospho-iFC; 0 to 300ng/ml TPO	Not detected	NA	5D-E	S9A-C	No comment
OX2059	CB14	Cord blood Cryopreserved MNCs	Trisomy 21	RNP AAVS1, RNP GATA1 Exon 2, phospho-iFC; 0 to 300ng/ml TPO	Not detected	NA	NA	S9D	No comment
OX1905	CB15	Cord blood Cryopreserved MNCs	Trisomy 21	RNP AAVS1, RNP GATA1 Exon 2, phospho-iFC; 0 to 300ng/ml TPO	Not detected	NA	NA	S9D	No comment
OX1803	CB16	Cord blood Cryopreserved MNCs	Trisomy 21	RNP AAVS1, RNP GATA1 Exon 2, phospho-iFC; 0 to 300ng/ml TPO	Not detected	NA	NA	S9D	No comment
297-01	PB4	Peripheral Blood Cryopreserved MNCs	TAM	CSF2RB, TPOR co-expression	0.4595	c.1-20G>A: Exon 2 splice acceptor	5G	9E-9F	Paired Samples, 6 days old
297-03	PB5	Peripheral Blood Cryopreserved MNCs	Resolving TAM	CSF2RB, TPOR co-expression	Not detected	NA	5G	9E-9F	Paired Samples. 280 days old
297-07	PB6	Peripheral Blood Cryopreserved MNCs	TAM to ML-DS	CSF2RB, TPOR co-expression	0.0684	c.1-20G>A: Exon 2 splice acceptor	5G	9E-9F	Paired Samples, 588 days old
NHBT	CB7	Cord blood Cryopreserved MNCs	Disomic	CSF2RB, TPOR co-expression	Not screened	NA	5H-I	9E-9F	No comment
NHBT	CB8	Cord blood Cryopreserved MNCs	Disomic	CSF2RB, TPOR co-expression	Not screened	NA	5H-I	9E-9F	No comment
NHBT	CB9	Cord blood Cryopreserved MNCs	Disomic	CSF2RB, TPOR co-expression	Not screened	NA	5H-I	9E-9F	No comment
NHBT	CB10	Cord blood Cryopreserved MNCs	Disomic	CSF2RB, TPOR co-expression	Not screened	NA	5H-I	9E-9F	No comment
OX2326	CB17	Cord blood Cryopreserved MNCs	Trisomy 21	CSF2RB, TPOR co-expression	Not detected	NA	5H-I	9E-9F	No comment
OX2438	CB18	Cord blood Cryopreserved MNCs	Trisomy 21	CSF2RB, TPOR co-expression	Not detected	NA	5H-I	9E-9F	No comment
OX2510	CB19	Cord blood Cryopreserved MNCs	Trisomy 21	CSF2RB, TPOR co-expression	Not detected	NA	5H-I	9E-9F	No comment
OX2829	CB20	Cord blood Cryopreserved MNCs	Trisomy 21	CSF2RB, TPOR co-expression	Not detected	NA	5H-I	9E-9F	No comment
253-01	PB7	Peripheral Blood Cryopreserved MNCs	TAM	CSF2RB, TPOR co-expression	0.00437	c.1-38_1-19del: loss of Exon 2 splice acceptor (intronic deletion of 20 bp that takes out Exon2 splice acceptor site)	5H-I	9E-9F	11 days old
319-01	PB8	Peripheral Blood Cryopreserved MNCs	TAM	CSF2RB, TPOR co-expression	0.9211	c.184_185insCCCTGTAGGCCT:p.Y62delinsSLX: nonsense mutation	5H-I	9E-9F	2 days old
340-01	PB9	Peripheral Blood Cryopreserved MNCs	TAM	CSF2RB, TPOR co-expression	1) 81.5%; 2)1.05%	1) c.90_91del:p.S30fs; 2) c.1-22c>g (intronic, 1bp upstream of SA)	5H-I	9E-9F	2 days old
353-01	PB10	Peripheral Blood Cryopreserved MNCs	TAM	CSF2RB, TPOR co-expression	1)77.8% ; 2)4.12%	1) c.A1G:p.M1V; 2) c.36dupA:p.S12fs	5H-I	9E-9F	1 day old
332-01	PB11	Peripheral Blood Cryopreserved MNCs	TAM	CSF2RB, TPOR co-expression	0.006822	c.36_37del:p.S12fs	5H-I	9E-9F	3 days old
270-01	PB12	Peripheral Blood Cryopreserved MNCs	TAM	CSF2RB, TPOR co-expression	0.00515	c.1_10delATGGAGTTCC p.1Mfs (Deletion of 10 bases which takes out the initiating methionine)	5H-I	9E-9F	10 days old
305-01	BM1	BoneMarrow Cryopreserved MNCs	ML-DS	CSF2RB, TPOR co-expression	0.21	c.120_124dupCTTGG and c.147_164delCCCGAGCACAGCCACCGC : p.D42fs	5H-I	9E-9F	313 days old
343-01	PB12	Peripheral Blood Cryopreserved MNCs	ML-DS	CSF2RB, TPOR co-expression	0.21	c.46_115dup, p.E39fs (70bp frameshift-duplication)	5H-I	9E-9F	243 days old
303-02	BM2	BoneMarrow Cryopreserved MNCs	ML-DS	CSF2RB, TPOR co-expression	0.12	c.196_203delGCTGAGGC:p.A66fs	5H-I	9E-9F	405 days old
341-01	PB13	Peripheral Blood Cryopreserved MNCs	ML-DS	CSF2RB, TPOR co-expression	0.6553	c.220_220+9del:p.V74fs (disrupts Exon 2 splice donor)	5H-I	9E-9F	660 days old
295-01	PB14	Peripheral Blood Cryopreserved MNCs	ML-DS	CSF2RB, TPOR co-expression	0.3368	c.151_173dupAGCACAGCCACCGCTGCAGCTGC:p.A58fs	5H-I	9E-9F	1741 days old

## Sheet: Table S2
Table S2. Differntially Enriched Pathways
pathway	NES	pval	padj	size	leadingEdge	Cell_type	Comparison	rank
DACOSTA_UV_RESPONSE_VIA_ERCC3_DN	12.5663	1e-50	1.1134328358209e-48	844	PDLIM5,DLC1,MEIS2,ZNF804A,GNAQ,VCL,STAM,RABGAP1L,SGMS1,MBOAT2,STK24,IL1RAP,JARID2,PPP1R12A,MACF1,KIFAP3,BMP2K,LYN,NBAS,MED13L,CDC42BPA,SEMA3C,ZMYND8,AFF1,MBNL1,USP15,RHOBTB3,ROCK2,RCOR1,SMAD3,CDYL,ELL2,AP3B1,VPS13B,TRIP12,FNBP1L,ATP2C1,GSE1,DYRK1A,NCOA1,IGF2BP3,CLASP2,BTAF1,TOP1,ATAD2B,FAM171A1,NCOA3,SOS1,FUT8,PPP3R1,ARHGEF7,PJA2,MRTFA,NUMB,OSBPL8,AGFG1,DDX17,ERC1,VPS13A,TP53BP2,ACSL3,AUH,PIP4K2A…	7.EMPP	Trisomy21vsGATA1s	3308
BUYTAERT_PHOTODYNAMIC_THERAPY_STRESS_UP	11.4525	1e-50	8.77529411764706e-49	803	KLF6,SPTLC2,SLC2A3,AKR1C1,RELN,DNAJB6,CD55,STAM,TNFSF9,CLIP2,PDE4DIP,BACH1,TFPI,MED13L,SQSTM1,NFAT5,RABGEF1,YPEL5,PTBP3,ELF1,KLF10,PJA2,DHRS3,RHOB,TFDP2,TXNIP,HERPUD1,NCOA3,TP53BP2,CDC42,RPS6KC1,RELB,SLC25A36,ARHGEF7,CCNL1,PIK3CA,HDAC5,ITCH,PTGS1,SPAG9,UBE2H,NFKBIA,JMJD1C,ATP2B1,F11R,ARIH1,NUMB,IRF9,ABI1,MAP4K3,ZMIZ1,STK17B,CDKN1C,RBM39,PNRC1,ARHGAP12,AFF4,MRTFA,FOS,KDM2A,ARID4B,BAZ2B,RBM25,ITSN2…	5.EryP	Trisomy21vsGATA1s	3765
DACOSTA_UV_RESPONSE_VIA_ERCC3_DN	11.2947	1e-50	8.77529411764706e-49	844	PDLIM5,DLC1,MEIS2,KLF6,IL1RAP,VCL,RHOBTB3,DNAJB6,STAM,STK24,MBOAT2,ZNF804A,MACF1,TFPI,SGMS1,MED13L,LYN,SMAD3,JARID2,KLF10,PJA2,KIFAP3,RABGAP1L,ATP2C1,ELL2,TAOK3,TAB2,NCOA3,TP53BP2,RCOR1,FAM171A1,GNAQ,DYRK1A,OSBPL8,AP3B1,MBNL1,ARHGEF7,PTEN,ANKRD28,ITCH,SPAG9,ERC1,ATP2B1,DDX17,HIF1A,BMP2K,STAG1,ARIH1,SEC14L1,NUMB,PPP1R12A,SP100,ATAD2B,TGFBR2,ABI1,BTAF1,PHLPP1,ZMIZ1,RBM39,ARHGAP12,ACAP2,SETX,MRTFA,Q…	5.EryP	Trisomy21vsGATA1s	3764
DACOSTA_UV_RESPONSE_VIA_ERCC3_COMMON_DN	11.0496	1e-50	1.1134328358209e-48	457	DLC1,MEIS2,ZNF804A,GNAQ,STAM,STK24,IL1RAP,JARID2,PPP1R12A,LYN,MED13L,CDC42BPA,SEMA3C,ZMYND8,AFF1,MBNL1,ROCK2,RCOR1,SMAD3,CDYL,TRIP12,FNBP1L,DYRK1A,NCOA1,IGF2BP3,CLASP2,ATAD2B,FAM171A1,NCOA3,SOS1,FUT8,ARHGEF7,PJA2,NUMB,OSBPL8,VPS13A,TP53BP2,ACSL3,AUH,PIP4K2A,MAN2A1,TCF12,ATF2,SMCHD1,ARHGAP12,QKI,PTPN12,KLF6,PICALM,MAP2K4,CDK13,USP9X,RUNX1,MARK3,MYCBP2,TIPARP,ANKRD17,PHLPP1,EVI5,CNOT2,ABI1,PTPRA,RN…	7.EMPP	Trisomy21vsGATA1s	3307
DIAZ_CHRONIC_MYELOGENOUS_LEUKEMIA_UP	10.8676	1e-50	1.24366666666667e-48	1381	RHAG,LAT,PDLIM5,KYNU,GATA1,TGFB1,TIMP1,ITGA2B,DLC1,PLP2,VCL,EMP3,FLNA,ZFP36L1,CD36,ITM2A,FCGR2A,LRRFIP2,KEL,TAGLN2,S100A6,PFN1,PIP5K1B,CFH,ABCC4,LMNA,CD63,STK24,HACD1,SNX3,YWHAZ,CD84,FADS2,PRKAR2B,KIFAP3,LY6E,RSU1,IL1RAP,MAP3K5,PDCD10,DAD1,PTGS1,XK,HBG1,S100A10,MSN,RGS10,ACTR2,UROD,CD55,STAM,GNAQ,ATP6V0E1,NDFIP1,WDR1,ILK,ARPC3,PTPN6,FLOT2,EIF4G2,PTPRC,NCF4,SPTA1,TMBIM1,CALM1,ZMYND8,CAPZB,LXN,PHKB…	6.EryMeg	Trisomy21vsGATA1s	3174
DIAZ_CHRONIC_MYELOGENOUS_LEUKEMIA_UP	10.8247	1e-50	1.1134328358209e-48	1381	RHAG,PDLIM5,KYNU,DLC1,ITGA2B,ABCC4,LRRFIP2,GATA1,GNAQ,LAT,VCL,STAM,CD36,FLNA,TGFB1,STK24,KEL,IL1RAP,PIP5K1B,HDC,PPP1R12A,CD84,KIFAP3,LYN,CD55,MAP3K5,NBAS,ZFP36L1,PRKAR2B,CFH,CDC42BPA,PIK3CB,PTPRC,ZMYND8,RREB1,YES1,TIMP1,PDCD10,PTBP3,PHKB,FADS2,CDYL,PSTPIP2,MAP4K4,AP3B1,CD46,EPB41,TRIP12,ZFAND6,ATP2C1,RANBP9,YWHAZ,RPS6KC1,DYRK1A,CTNNBL1,HACD1,NCOA1,PDGFC,NDFIP1,EIF4G2,ACTR3,FCGR2A,TOP1,PRKCQ,SPTA1…	7.EMPP	Trisomy21vsGATA1s	3306
HOUNKPE_HOUSEKEEPING_GENES	10.6742	1e-50	1.24366666666667e-48	1108	MAX,STK24,LAMTOR1,SNX3,DAD1,DYNLRB1,HIGD1A,ACTR2,UROD,ATP6V0E1,EIF4G2,U2AF1,TMBIM6,RPN1,ADRM1,CALM1,RNF167,UBAC1,UBE2Q1,SNRPD3,CDC42SE1,ARPC2,JAK1,NRBP1,CMAS,DNAJB6,RAB11A,PRKAR1A,TMEM50A,PSMD6,VPS29,RANBP9,DNAJC3,HP1BP3,EIF2AK1,GPX4,DDX17,TMEM219,PPP6R1,VPS25,PIP5K1C,PDIA3,SUB1,CDC42,EBAG9,ARNT,VCP,RNF216,TRIP12,UBE2F,PSMG3,DNAJB11,YWHAB,AP2M1,ZFYVE21,C1orf174,ARHGAP1,FAM50A,FAM20B,MORF4L1,RAC1,…	6.EryMeg	Trisomy21vsGATA1s	3173
JIANG_MELANOMA_TRM9_CD8	10.0927	1e-50	2.19470588235294e-48	522	AREG,ZFP36L2,GAPDH,HMGN1,SRSF5,IFITM2,IFITM1,NR4A1,ACTG1,RPS3,SRSF7,RGS1,ARHGDIB,CTSW,SARAF,MAP3K8,HLA-E,TSEN54,SRGN,BIN1,ZFP36,NR4A3,PIM1,CLIC1,RBM8A,EEF1A1,PABPC1,CCNI,RPL28,SON,LSP1,APRT,BTG1,CD52,CORO1A,ARHGAP9,TRAPPC1,CDC37,DDX5,DAZAP2,ITM2A,SPRY1,IL2RG,HLA-B,TNFAIP3,HSPA8,ACAP1,AKAP13,GNAS,ARPC1B,ID2,LSM2,MAGED2,SOD1,PGK1,CTSC,STAT4,CTDSP1,RAC2,ENO1,EID1,ARHGEF1,PNPLA2,SH2D2A,PIK3R1,PPDPF,S…	7.EMPP	NormalvsTrisomy21	2789
KRIGE_RESPONSE_TO_TOSEDOSTAT_24HR_UP	10.002	1e-50	8.77529411764706e-49	734	DBN1,TYROBP,RHOBTB3,PTH2R,SLC2A3,PTPRC,CD55,NEAT1,HCST,BIN2,PLP2,HLA-A,SQSTM1,NFAT5,YPEL5,PTBP3,KLF10,PNPLA8,RSRP1,TES,JAK1,ITM2B,TXNIP,NCOA3,RPS6KC1,SLC25A36,LPP,PIK3CA,ABHD2,UBE2H,F11R,BNIP3L,BMP2K,SEC14L1,CPEB2,NUMB,SP100,ATAD2B,CPEB4,PRMT2,SCAF4,CYLD,RBM39,FCER1G,RAPGEF2,BAZ2B,PRNP,NFIL3,KDM6B,KDM6A,AP1S2,GPATCH2L,GPSM3,SPPL2A,LNPEP,CHD2,MAP1LC3B,PCMTD1,AKAP13,SECISBP2L,RAB8B,LRRFIP1,EHBP1L1,…	5.EryP	Trisomy21vsGATA1s	3763
BUYTAERT_PHOTODYNAMIC_THERAPY_STRESS_UP	9.98545	1e-50	1.1134328358209e-48	803	SLC2A3,STAM,DHRS3,CD55,ELF1,BACH1,SPTLC2,MED13L,PTBP3,CDYL,GSE1,RPS6KC1,RABGEF1,NCOA1,NFAT5,NCOA3,SOS1,ARHGEF7,PJA2,MRTFA,MAP4K3,NUMB,PIK3CA,JMJD1C,KDM6A,TXNIP,TP53BP2,ITCH,ATF2,ARHGAP12,LCOR,ZEB2,NIPBL,ZC3HAV1,KLF6,TFDP2,DNAJB6,MEF2A,TFPI,MARK3,NUDT4,TIPARP,EP300,TANK,MORC3,ABI1,PTGS1,SMURF1,NDEL1,CLIP2,TNFSF9,ATF7IP,TANC2,RBM25,SENP5,DENND4C,BAZ2B,R3HCC1L,CITED2,ARFGEF2,IGF1R,FOXJ3,RNF38,TXNRD1…	7.EMPP	Trisomy21vsGATA1s	3305
HSIAO_HOUSEKEEPING_GENES	9.89872	1e-50	9.94933333333333e-49	384	RPS26,EEF2,PCBP2,FTH1,RPL7A,RPL12,RPS3,RPS14,SLC25A6,RACK1,RPL18A,RPLP0,RPL19,EEF1A1,SOD1,CIRBP,RPL6,ENO1,RPL28,EEF1G,RPL29,VIM,EEF1B2,GAPDH,RPL8,GSTP1,RPS5,RPS2,ARHGDIB,RPL18,EIF4A1,CAPNS1,RPL11,RPS15,ATP5F1B,TRIM28,PABPC1,HINT1,PHB2,CYB5R3,SLC25A5,RPL41,EIF3F,RPS28,COMT,RPS7,TAGLN2,RPL3,MAZ,RPL13,ATP5MC2,RPSA,NACA,FKBP4,EEF1D,OAZ1,RPL32,DDX39B,BCAP31,EIF1,ANXA11,RPLP1,TXNIP,CSTB,JUNB,RPS8,CLIC1…	5.EryP	NormalvsTrisomy21	2890
SHEN_SMARCA2_TARGETS_UP	9.79286	1e-50	1.1134328358209e-48	419	HERC2,GNAQ,ARMC8,MACF1,KIFAP3,PHKB,DCAF6,TRIP12,ZFAND6,ITFG1,NCOA1,NDFIP1,RAB2A,ACTR3,NCOR1,PJA2,MAP4K3,NUMB,LMBRD1,OSBPL8,APC,ORC4,DCP2,USP9X,SCFD1,ANKRD17,TANK,CENPC,ABI1,NPTN,DENND4C,STAG1,HIPK1,BAZ2B,NPEPPS,ARFGEF2,TMEM131,RNF38,UVRAG,STAM2,CTNNA1,ZFC3H1,RAB6A,WDR11,SETX,FBXO11,SS18,RDX,PUM2,GBE1,SOS2,MED21,SENP6,ANKMY2,EFCAB14,ROCK1,FMR1,TGOLN2,SHOC2,KIDINS220,SCAF8,PPP2R5C,RAB1A,ATP6V0E1,CE…	7.EMPP	Trisomy21vsGATA1s	3304
GRAESSMANN_APOPTOSIS_BY_DOXORUBICIN_DN	9.78345	1e-50	1.1134328358209e-48	1743	ARHGAP6,CARMIL1,MTSS1,LRBA,RABGAP1L,KMT2C,JARID2,CHD7,EPB41L4A,MAP3K5,LIMS1,CDC42BPA,FER,RREB1,YES1,ATXN7,ROCK2,PTBP3,FADS2,NEAT1,RSRC1,EXOC4,ZFAND3,YWHAZ,DYRK1A,CTNNB1,GLG1,CLASP2,BIRC6,NDFIP1,RAB2A,LTBP1,VTI1A,FUT8,NCOR1,USP47,MRTFA,MAP4K3,NUMB,LMBRD1,NET1,LPP,DDX17,PDK1,ERC1,UBR1,ZNF644,ATP11A,FAR1,TXNIP,ARHGAP21,OSBPL6,ITCH,AP1G1,DCUN1D1,TCF12,PLP2,ATF2,FOXN2,RAD51B,ERBIN,ATG10,PRMT2,QKI,ZEB2…	7.EMPP	Trisomy21vsGATA1s	3303
HSIAO_HOUSEKEEPING_GENES	9.76159	1e-50	2.19470588235294e-48	384	FTH1,RPS26,PCBP2,GAPDH,EIF1,EEF2,CIRBP,IFITM1,ACTG1,RPS3,EIF4A1,ARHGDIB,RPL7A,RPLP0,HLA-E,CD34,SLC25A5,ZFP36,GSTP1,HINT1,VIM,PIM1,NFKBIA,CLIC1,EEF1A1,PABPC1,CCNI,LGALS1,RPL28,CYB5R3,SON,JUNB,SLC25A3,ATP5F1B,RACK1,UBB,RPL19,DDX5,DAZAP2,SEC61B,HLA-B,COMT,PEBP1,EIF3F,RPS14,EEF1D,BTG2,APEX1,RPL8,GNAS,RPL11,PHB2,CSTB,CAPNS1,SOD1,PGK1,RPN2,ENO1,JUND,CLTA,DDX39B,RPS5,HNRNPK,DUSP1,TRIM28,SLC25A6,MSN,NPM1…	7.EMPP	NormalvsTrisomy21	2788
DIAZ_CHRONIC_MYELOGENOUS_LEUKEMIA_UP	9.69642	1e-50	1.69568181818182e-48	1381	RHAG,PDLIM5,KYNU,ITGA2B,DLC1,GATA1,LAT,TGFB1,VCL,HDC,CD36,ABCC4,FLNA,IL1RAP,STAM,KIFAP3,ZFP36L1,GNAQ,CD55,EIF4G2,CFH,KEL,STK24,PIP5K1B,PPP1R12A,CD84,LRRFIP2,CDC42BPA,DNAJB6,PRKAR2B,ANXA1,TIMP1,ZMYND8,LYN,PLP2,FCGR2A,MAP4K4,YES1,MSN,AP3B1,PIM1,PIK3CB,MAP3K5,RREB1,SLC7A5,RPS6KC1,ACTR3,CITED2,HACD1,PDCD10,NBAS,LCP2,ITM2A,PACSIN2,PTBP3,PRKCQ,NCOA1,PTPRC,NCF4,IL7,NET1,WDR1,LMNA,TFG,IFRD1,CD46,ATP6V0E1…	7.EMPP	NormalvsGATA1s	3147
HSIAO_HOUSEKEEPING_GENES	9.6704	1e-50	9.81842105263158e-49	384	RPS26,FTH1,PCBP2,GAPDH,EEF2,RPL7A,IFITM1,CIRBP,RPLP0,RPS3,EIF4A1,ARHGDIB,VIM,CAPNS1,SLC25A6,RPL19,ACTG1,LGALS1,RPL28,GSTP1,RPL12,EEF1A1,SOD1,RPS14,PIM1,RPL18A,COMT,SLC25A5,RPL6,EIF1,RACK1,HINT1,ENO1,CD34,RPL8,RPL29,CYB5R3,PABPC1,APEX1,ATP5F1B,CLIC1,HLA-B,RPS5,PHB2,MAZ,DAZAP2,RPL18,ATP5MC2,GLUL,SLC25A3,EIF3F,OS9,SON,EEF1D,CLTA,ATP5F1A,RPL11,RPN2,RPS15,RPSA,UBB,CD81,RPL41,TRIM28,NPM1,EEF1G,RPL36AL,…	6.EryMeg	NormalvsTrisomy21	3029
JIANG_MELANOMA_TRM8_CD4	9.54866	1e-50	2.19470588235294e-48	423	FTH1,RPS4X,RPS26,EGR1,ZFP36L2,EIF1,TSC22D3,DDIT4,IFITM2,IFITM1,NR4A1,RPS3,SRSF7,ARHGDIB,GMFG,RPL7A,SARAF,RPLP0,HLA-E,SRGN,ZFP36,HINT1,VIM,PIM1,NFKBIA,EEF1A1,PABPC1,RPL28,RPL10,APRT,BTG1,JUNB,ANXA1,DNAJB1,CORO1A,FOSB,CDC37,RPL19,DDX5,DAZAP2,ICAM2,ITM2A,IL2RG,HLA-B,TNFAIP3,PEBP1,HSPA8,RPS14,PBXIP1,EEF1D,JUN,BTG2,ACAP1,FOS,RPL8,RPL11,ARPC1B,ID2,GPSM3,NOP53,SOD1,PGK1,STAT4,ENO1,JUND,ARHGEF1,DDX3X,SH2…	7.EMPP	NormalvsTrisomy21	2787
KIM_ALL_DISORDERS_OLIGODENDROCYTE_NUMBER_CORR_UP	9.51712	1e-50	9.94933333333333e-49	740	RPS4X,EEF2,RPS3,SLC25A6,RACK1,IMPDH2,SOD1,CIRBP,HMGN1,ENO1,RPL28,CCT8,RPL29,VIM,GAPDH,RPL8,ATP5PO,AHCY,TKT,SERP1,CA2,CAPNS1,RPS12,RPL11,TUFM,SUMO3,VPS28,TRIM28,HINT1,LAPTM4B,PUF60,AKR1A1,TPI1,GRHPR,RPL41,EIF3F,EIF3G,DDOST,CCT7,EIF3K,RUVBL2,LY6E,ECH1,CTDNEP1,RNH1,RPL3,RPL13,PPP2R1A,LSM7,RAN,OAZ1,RPL32,BCAP31,IER2,EIF3D,MARCKSL1,EID1,SPINT2,RPLP1,ATP5F1D,CSTB,TUBB4B,TALDO1,RPS8,TRAP1,TRIB2,FARSA,GP…	5.EryP	NormalvsTrisomy21	2889
SHEN_SMARCA2_TARGETS_UP	9.50948	1e-50	8.77529411764706e-49	419	HERC2,MACF1,YPEL5,NDFIP1,PJA2,ARMC8,KIFAP3,TAB2,PHKB,TGOLN2,GNAQ,OSBPL8,RAB2A,ZFAND6,STAG1,NUMB,ABI1,MAP4K3,SETX,LMBRD1,ARID4B,RAB1A,BAZ2B,UVRAG,ITSN2,NPEPPS,TRIP12,ITFG1,NCOR1,CTNNA1,ARFGEF2,PRKAR1A,TMED7,MED21,ZFC3H1,NPTN,RAB6A,SHOC2,SCFD1,APC,RIOK3,DENND4C,SON,CENPC,MORF4L1,DLG1,DCAF6,DCP2,SOS2,RDX,NCOA1,TANK,SCAF8,USP9X,LAPTM4A,RAB7A,CALCOCO2,HIPK1,SEC24B,STXBP3,KIDINS220,PUM2,VPS26A,TRAK2,FB…	5.EryP	Trisomy21vsGATA1s	3762
DACOSTA_UV_RESPONSE_VIA_ERCC3_COMMON_DN	9.50879	1e-50	8.77529411764706e-49	457	DLC1,MEIS2,KLF6,IL1RAP,STAM,STK24,ZNF804A,MED13L,LYN,SMAD3,JARID2,KLF10,PJA2,TAB2,NCOA3,TP53BP2,RCOR1,FAM171A1,GNAQ,DYRK1A,OSBPL8,MBNL1,ARHGEF7,ATP2B1,STAG1,ARIH1,SEC14L1,NUMB,PPP1R12A,ATAD2B,ABI1,PHLPP1,ZMIZ1,RBM39,ARHGAP12,QKI,CLASP2,RAPGEF2,BAZ2B,UVRAG,ITSN2,NPEPPS,TRIP12,FNBP1L,KLF7,AGAP1,SERPINE1,CEP170,AUH,CREB1,MAP2K4,PTPN12,MARK3,MKLN1,TIPARP,E2F3,CHD1,RAB6A,ZMYND8,CLASP1,MAPK6,ZMYM2,CNOT…	5.EryP	Trisomy21vsGATA1s	3761
DIAZ_CHRONIC_MYELOGENOUS_LEUKEMIA_UP	9.47617	1e-50	8.77529411764706e-49	1381	RHAG,KYNU,PDLIM5,TGFB1,LAT,DLC1,TIMP1,IL1RAP,ITM2A,ITGA2B,VCL,FLNA,PTPRC,GATA1,DNAJB6,CD55,ABCC4,STAM,ZFP36L1,STK24,LRRFIP2,ACTR2,MSN,EMP3,CD63,BSG,YES1,KEL,HBG1,PLP2,LYN,SQSTM1,LMNA,PTBP3,NDFIP1,KIFAP3,TAGLN2,EPB41,ATP2C1,CLIC2,YWHAZ,TFDP2,PDGFC,TAX1BP1,PIP5K1B,SLC7A5,PHKB,HACD1,CFH,TP53BP2,PTPN6,RPS6KC1,GNAQ,ELF4,DYRK1A,RANBP9,AP3B1,CD46,HDC,PTGS1,ZFAND6,NCF4,LCP2,F11R,BNIP3L,TMOD3,PDCD10,PPP1R…	5.EryP	Trisomy21vsGATA1s	3760
MARSON_BOUND_BY_FOXP3_UNSTIMULATED	9.45942	1e-50	1.24366666666667e-48	1153	TGFB1,APLP2,EMP3,ZFP36L1,FCGR2A,FYB1,ARMC8,LAMTOR1,P2RY14,YWHAZ,CD84,DHRS3,SLC9A9,TPST2,ACTR2,KLF6,NDFIP1,TXNIP,GPD2,DOK2,TRAPPC1,PTPRC,SESTD1,JARID2,CDKN2D,ELF1,C17orf49,RHOA,SMAD3,LCP2,CLTC,FYN,CITED2,PDK1,RSRP1,ARHGDIB,ARL15,DNAJB6,RNASEK,PRKAR1A,TMOD3,TMEM50A,ABHD2,RHOB,CSK,HP1BP3,ARHGAP12,NUDT4,OSTF1,LRP10,SEC11A,SUB1,TP53INP1,ITM2B,SLC39A3,LIMD2,YES1,MKNK1,AMBRA1,ARL4A,NRDC,TSC22D4,FNTB,ACT…	6.EryMeg	Trisomy21vsGATA1s	3172
DACOSTA_UV_RESPONSE_VIA_ERCC3_DN	9.39439	1e-50	1.69568181818182e-48	844	PDLIM5,DLC1,MEIS2,VCL,IL1RAP,ELL2,STAM,KIFAP3,RABGAP1L,ZNF804A,GNAQ,SGMS1,STK24,PPP1R12A,CDC42BPA,RHOBTB3,ROCK2,MBOAT2,DNAJB6,MACF1,USP15,ZMYND8,LYN,JARID2,FNBP1L,AP3B1,SEMA3C,FAM171A1,RCOR1,MED13L,NBAS,ACSL3,ARHGEF7,RUNX1,GSE1,TMEM131L,BMP2K,NCOA1,SP100,IFRD1,TRIM24,CNOT2,ARHGAP12,MAP2K4,PTPRA,FUT8,TFPI,CDYL,TMEM87A,CENPC,APC,PTPN12,NUMB,MICU2,SMAD3,ITGA6,MRTFA,DDX17,TRIP12,OSBPL8,TANK,SRSF7,TP5…	7.EMPP	NormalvsGATA1s	3146
GRAESSMANN_APOPTOSIS_BY_DOXORUBICIN_DN	9.29948	1e-50	1.24366666666667e-48	1743	ARHGAP6,PLP2,CARMIL1,MTSS1,ALDOA,LIMS1,ACTB,YWHAZ,FADS2,RABGAP1L,DBN1,CHD7,MAP3K5,LTBP1,MSN,KLF6,LRBA,NDFIP1,EPB41L4A,TXNIP,ROCK2,PRMT2,CCL5,NAA10,GRTP1,JARID2,TSPAN15,TPM3,C17orf49,ARPC1B,FUT8,CDC42BPA,FYN,VASP,FOXN2,PDK1,OSBPL6,PTBP3,KMT2C,CTDSPL,GABBR1,CAP1,LPP,SLC44A1,GLG1,CLIP2,NEAT1,FER,ATG10,RREB1,MBOAT1,FXN,HP1BP3,NET1,DDX17,KIF2A,NUDT4,LMBRD1,BNIP3,TOM1L1,SLC39A3,GNG5,YES1,ARHGAP21,ELOVL…	6.EryMeg	Trisomy21vsGATA1s	3171
DACOSTA_UV_RESPONSE_VIA_ERCC3_DN	9.2767	1e-50	1.24366666666667e-48	844	PDLIM5,DLC1,MEIS2,VCL,MBOAT2,STK24,KIFAP3,RABGAP1L,IL1RAP,ZNF804A,RHOBTB3,SGMS1,STAM,GNAQ,KLF6,MACF1,ROCK2,JARID2,BMP2K,ZMYND8,FNBP1L,PPP1R12A,FUT8,SMAD3,CDC42BPA,FYN,ITGA6,NBAS,DNAJB6,PJA2,RCOR1,SEMA3C,ARHGAP12,DDX17,KIF2A,TP53BP2,LYN,TFPI,USP15,MID1,TRIP12,DAAM1,KLF10,GSE1,FAM171A1,STK10,MED13L,PTPRA,PTPN12,SKAP2,CLASP2,AUH,TIPARP,SP100,PPP2R5A,NCOA3,R3HDM2,CDYL,TRIM24,SERPINE1,ERC1,ATP2C1,RDX,…	6.EryMeg	Trisomy21vsGATA1s	3170
MARTENS_TRETINOIN_RESPONSE_DN	9.2421	1e-50	9.94933333333333e-49	762	RPS4X,FTH1,RPL7A,RPS3,RPS14,APRT,RACK1,RPL18A,ZFP36L2,RPL10,RPLP0,IMPDH2,RPL19,EEF1A1,CIRBP,HMGN1,HSPA8,TUBA1C,RPL29,VIM,EEF1B2,FABP5,ARL6IP4,RPS5,RPL18,SYNGR2,RPS12,DIPK1B,RPL11,TUFM,MYC,SOX4,MAT2A,TRIM28,PABPC1,HDC,HINT1,PHB2,CCDC85B,PGLS,EIF3G,SRM,RNH1,RPL3,MAZ,RPSA,APEH,TUBA1B,PNPLA2,RAN,MRPL57,RPL32,EIF1,IL2RG,C1orf43,PCBP1,RPL30,MARCKSL1,RPL5,NDUFA11,SNX5,TXNIP,HMGA1,RPS8,STOML2,PRMT1,FARSA…	5.EryP	NormalvsTrisomy21	2888
OSMAN_BLADDER_CANCER_UP	9.20506	1e-50	1.1134328358209e-48	390	PDLIM5,KYNU,FLNA,TGFB1,KMT2C,FYB1,ELF1,PTPRC,RAB10,MBNL1,MALAT1,NEAT1,ZFAND3,SMG1,RPS6KC1,IQGAP1,SESTD1,ACTR3,TOP1,SOS1,USP47,PDIA3,FAR1,MAN2A1,DCUN1D1,TMOD3,FOXN2,LNPEP,FNIP1,STRN,ANKRD17,SPPL2A,HSP90B1,ZMAT3,UBA6,ATF7IP,STK4,PSME4,CITED2,ATG5,SLC44A1,TNKS2,ZNF148,PIAS1,WDR41,FCER1G,ATP11B,TNRC6B,GBE1,SCAF11,GALNT1,OXR1,ARIH1,CCND3,CHD9,PCMTD1,TGOLN2,TNPO3,SNX13,RIF1,MAP3K2,PARP4,TTC17,CERT1,GLY…	7.EMPP	Trisomy21vsGATA1s	3302
KRIGE_RESPONSE_TO_TOSEDOSTAT_24HR_UP	9.1721	1e-50	1.1134328358209e-48	734	SLC2A3,BMP2K,CD55,PTH2R,CDC42BPA,PTPRC,RHOBTB3,PTBP3,NEAT1,TYROBP,RPS6KC1,NCOA1,ATAD2B,CPEB4,NFAT5,NCOA3,MAML3,NUMB,PIK3CA,LPP,ABHD2,KDM6A,RSRP1,TXNIP,SCAF4,CPEB2,TCF12,PLP2,LNPEP,PNPLA8,GPCPD1,PRMT2,STIM1,USP9X,ITPR2,MEF2A,BIN2,SP100,TANK,SPPL2A,TES,NOL4L,UGGT1,DBN1,PREX1,STK4,JAK1,ITPR1,BAZ2B,KLHL2,RHBDD1,CHD2,FYN,PHF21A,SLC12A6,CDK19,GPATCH2L,SECISBP2L,CBLB,STK3,TTC7B,FCER1G,TNRC6B,SCYL2,SH3GL…	7.EMPP	Trisomy21vsGATA1s	3301
KRIGE_RESPONSE_TO_TOSEDOSTAT_24HR_UP	9.1646	1e-50	1.24366666666667e-48	734	PLP2,SLC2A3,TYROBP,MYL12A,BIN2,HCST,FCER1G,DBN1,RHOBTB3,CD55,PTH2R,TXNIP,PRMT2,PTPRC,BMP2K,EHBP1L1,CDC42BPA,FYN,RSRP1,PTBP3,SQSTM1,JAK1,LPP,GPSM3,NOL4L,NEAT1,CPEB2,ABHD2,YPEL5,LRP10,ITM2B,CPEB4,RPS6KC1,ZNF641,NFIL3,LGALS1,PREX1,KLF10,C11orf21,ANXA3,MBD6,TTC7B,C18orf32,MAP1LC3B,AP1S2,SP100,NCOA3,PNPLA8,CHFR,CCDC92,RBM4,LNPEP,CR1,NUMB,SPPL2A,AP1G2,UGGT1,C4orf33,STIM1,SSH1,ZER1,NCOA1,SYNJ1,STK4,RETN…	6.EryMeg	Trisomy21vsGATA1s	3169
KRIGE_RESPONSE_TO_TOSEDOSTAT_6HR_UP	9.1578	1e-50	8.77529411764706e-49	890	ITM2A,DBN1,TYROBP,RHOBTB3,PTH2R,SLC2A3,PTPRC,CD55,ABCC4,NEAT1,HCST,LYZ,PLP2,HLA-A,NFAT5,YPEL5,PTBP3,KLF10,ARMC8,PNPLA8,RSRP1,TES,JAK1,ITM2B,PTGER4,TXNIP,NCOA3,RPS6KC1,SLC25A36,SPRY1,LPP,PIK3CA,ABHD2,UBE2H,F11R,BNIP3L,BMP2K,SEC14L1,CPEB2,NUMB,SP100,ATAD2B,CPEB4,SCAF4,CYLD,RBM39,FCER1G,RAPGEF2,BAZ2B,PRNP,NFIL3,KDM6B,KDM6A,AP1S2,GPATCH2L,GPSM3,ARL4A,SPPL2A,LNPEP,CHD2,MAP1LC3B,PCMTD1,AKAP13,SECISBP2L…	5.EryP	Trisomy21vsGATA1s	3759
JIANG_MELANOMA_TRM9_CD8	9.15002	1e-50	1.165e-48	522	CTSW,IL2RG,ITM2A,SPN,TLN1,TMSB4X,CD63,HCST,NR4A2,HLA-B,CD164,ZFP36L1,MSN,B2M,ZFP36,PTPN6,NR4A1,LIMS1,BIN2,ACTR2,CCND3,ARPC1B,PDIA3,PPP1R18,HLA-A,SPRY1,KLF6,MAGED2,GADD45B,S100A10,GNAS,IQGAP1,MT-ATP6,MAP3K8,TRAPPC1,SH3BGRL3,ARPC2,SON,PNPLA2,HMGN1,LDLRAD4,CDC37,HLA-C,PTGER4,CLIC1,LAMP1,MT-CO1,RHOC,MT-CO2,FYB1,ALDOA,JAK1,CELF2,PIM1,PPP1CA,ANXA11,RASAL3,TPM3,ITM2B,DOK2,MYL12A,ARHGDIB,MYADM,CD7,LCP2,A…	5.EryP	NormalvsGATA1s	3647
OSMAN_BLADDER_CANCER_UP	9.14577	1e-50	8.77529411764706e-49	390	KYNU,PDLIM5,TGFB1,MALAT1,FLNA,PTPRC,NEAT1,BSG,IQGAP1,ZFAND3,PDIA3,HSP90B1,ELF1,RNH1,FYB1,SESTD1,KMT2C,CCND3,SMG1,TGOLN2,RPS6KC1,SLC25A36,MBNL1,KLF2,RAB10,ARIH1,TMOD3,CALR,SPI1,NCKAP1L,FCER1G,ALDH3B1,ZMAT3,PRNP,IRF2BP2,PIAS1,FNIP1,PTP4A2,UBA6,STRN,SPPL2A,LNPEP,SF3B1,TMED7,PCMTD1,AKAP13,MAP3K2,TNKS2,DCUN1D1,RIOK3,TPP1,ATF7IP,VASP,FXR1,TBL1XR1,CITED2,FOXN2,ATG5,USP47,INO80D,TOP1,MOB1A,TNRC6B,ZFYVE16…	5.EryP	Trisomy21vsGATA1s	3758
KRIGE_RESPONSE_TO_TOSEDOSTAT_6HR_UP	9.11874	1e-50	1.1134328358209e-48	890	ABCC4,ARMC8,SLC2A3,BMP2K,CD55,PTH2R,CDC42BPA,PTPRC,RHOBTB3,PTBP3,NEAT1,TYROBP,RPS6KC1,ATAD2B,CPEB4,NFAT5,NCOA3,MAML3,NUMB,PIK3CA,LPP,ABHD2,KDM6A,RSRP1,TXNIP,SCAF4,CPEB2,TCF12,PLP2,LNPEP,PNPLA8,GPCPD1,ZEB2,STIM1,USP9X,ITPR2,MEF2A,SP100,TANK,SPPL2A,TES,NOL4L,UGGT1,LYZ,DBN1,PREX1,STK4,JAK1,ITPR1,BAZ2B,KLHL2,RHBDD1,CHD2,FYN,PHF21A,SLC12A6,CDK19,GPATCH2L,SECISBP2L,CBLB,STK3,TTC7B,FCER1G,TNRC6B,SCYL2,S…	7.EMPP	Trisomy21vsGATA1s	3300
IBRAHIM_NRF2_UP	9.10107	1e-50	1.1134328358209e-48	510	ABCC4,LRRFIP2,STK24,LRP12,BACH1,RAB10,YES1,DNAJC3,RANBP9,RPS6KC1,CTNNBL1,HSPA5,EIF4G2,ACTR3,NCOA3,PPP3R1,PDIA3,NUMB,WDR26,AGFG1,HBS1L,ITCH,ERP44,TMOD3,SLC7A5,PNPLA8,MEF2A,SCFD1,HSP90B1,RNF216,CORO1C,SDCBP,DNAJB11,MSN,TM9SF3,SPX,TXNRD1,WWP1,VEZT,GCLC,KIAA0232,NUFIP2,SENP2,ZNF148,GPATCH2L,CUL3,STAU2,TVP23C,RTN4,ATP11B,GBE1,UBE2K,IFRD1,ABCD3,OTULIN,AKR1C1,TLK2,GALNT1,PPM1B,GTF2E2,RABEP1,PPP2CB,FNDC3…	7.EMPP	Trisomy21vsGATA1s	3299
HOUNKPE_HOUSEKEEPING_GENES	9.09857	1e-50	2.19470588235294e-48	1108	PCBP2,EIF4A1,SLC25A5,ILF2,HINT1,RBM8A,CCNI,SON,SLC25A3,PPP2R1A,CDC37,SEC61B,KDELR1,APH1A,COMT,ERGIC3,LAMTOR1,EEF1D,EIF3K,ADH5,EIF1AX,MAP2K2,RPL7L1,PMPCB,ERP29,EIF3I,SRSF9,SOD1,RPN2,SERP1,PUF60,SNX3,TMEM259,TRIM28,SMARCB1,DNAJB6,TCF25,EIF3G,CTDNEP1,DDX27,C1orf43,MRPL57,SNRPB,PPP6R1,FKBP8,EPN1,RALA,MAZ,FAM32A,ATP6V0E1,EIF4H,STAT3,TPI1,VCP,LRPAP1,BTF3,APEH,SF3B2,WDR45B,YWHAB,EIF4G2,OS9,DNAJC4,EMC6,T…	7.EMPP	NormalvsTrisomy21	2786
JIANG_MELANOMA_TRM9_CD8	9.06325	1e-50	1.73279069767442e-48	522	CTSW,IL2RG,ITM2A,TMSB4X,HCST,SPN,B2M,TLN1,ZFP36L1,LDLRAD4,HMGN1,MYL12A,ALDOA,ARHGDIB,MYL6,CD63,FYB1,LIMS1,TRAPPC1,CCND3,PFN1,MSN,ACTB,PTPN6,MT-CO1,S100A10,CD164,NR4A2,RHOC,RGS10,BIN2,SH3BGRL3,ARPC1B,PPP1CA,GNAS,WDR1,CLIC1,ARPC2,ILK,MAGED2,ACTR2,HLA-B,ABHD17A,IQGAP1,DOK2,PIM1,CAPZB,CAP1,PNPLA2,RHOA,EIF4G2,CCL5,ATP5F1E,CD7,AP2M1,YWHAB,ANXA11,VPS28,NR4A1,PPP1R18,LCP2,SPRY1,CTSC,CDK2AP2,CDC37,HLA-C,C…	6.EryMeg	NormalvsGATA1s	3187
SHEN_SMARCA2_TARGETS_UP	9.06212	1e-50	1.24366666666667e-48	419	HERC2,ARMC8,KIFAP3,GNAQ,ATP6V0E1,NDFIP1,MACF1,PHKB,PJA2,PRKAR1A,DCAF6,ORC4,LMBRD1,YPEL5,CTNNA1,TRIP12,ACTR3,TGOLN2,EFCAB14,MORF4L1,RAB14,MOCS2,DCP2,RDX,NUMB,NCOR1,RAB2A,RALB,ANKMY2,ZFAND6,NCOA1,APC,SEPTIN2,ABI1,TRAK2,SLC25A12,SETX,STX7,NNT,PCMT1,MRTFB,RAB6A,CAPZA2,NFU1,NPTN,DENND4C,PRKD1,APOOL,TMED7,RIOK3,WDR11,ANP32A,STAM2,STXBP3,RB1,RAB7A,NPEPPS,IDE,ITFG1,SCFD1,RNF14,ANXA7,KIDINS220,FMR1,PON2,N…	6.EryMeg	Trisomy21vsGATA1s	3168
KIM_BIPOLAR_DISORDER_OLIGODENDROCYTE_DENSITY_CORR_UP	9.03958	1e-50	9.94933333333333e-49	663	RPS4X,RPL12,SLC25A6,EEF1A1,SOD1,CIRBP,HMGN1,ENO1,CCT8,RPL29,VIM,RPL8,ATP5PO,AHCY,TKT,CAPNS1,IGFBP7,RPS12,RPL11,TUFM,SUMO3,VPS28,TRIM28,HINT1,PHB2,PUF60,AKR1A1,TPI1,GRHPR,RPL41,EIF3F,EIF3G,EIF3K,ECH1,RNH1,RPL3,NACA,PPP2R1A,RAN,OAZ1,RPL32,EIF3D,MARCKSL1,EID1,SPINT2,RPLP1,TUBB4B,TALDO1,SRSF9,TRAP1,TRIB2,FARSA,GPX4,ERP29,UQCRC1,LDHB,MYL12B,APEX1,CNBP,RPL36AL,PKM,STK25,C1QBP,CLNS1A,PSMD8,CSNK2B,DAZAP2…	5.EryP	NormalvsTrisomy21	2887
JIANG_MELANOMA_TRM9_CD8	9.03402	1e-50	9.81842105263158e-49	522	IFITM2,GAPDH,AREG,CTSW,IFITM1,RPS3,APRT,HMGN1,ZFP36L2,ARHGDIB,ACTG1,LSP1,RPL28,EEF1A1,SOD1,PIM1,SRGN,ENO1,IL2RG,PABPC1,CORO1A,RGS1,SRSF7,NR4A1,CLIC1,HLA-B,HCST,VPS28,MAP3K8,TRAPPC1,DAZAP2,RBM8A,CDC37,TSEN54,CTSC,SARAF,FKBP8,ARPC1B,SON,TPI1,ECH1,DYNLT1,MFSD10,STAT4,PNPLA2,RPS12,NPM1,SRSF5,CAPG,PGK1,CD52,HLA-E,PTPN6,EID1,LSM2,CCNI,PIK3R1,HSPA8,RAC2,SF3A2,HNRNPA1,ARPC2,BIN1,ARHGEF1,ABRACL,ARHGDIA,NR…	6.EryMeg	NormalvsTrisomy21	3028
IBRAHIM_NRF2_UP	8.98564	1e-50	8.77529411764706e-49	510	HSPA5,AKR1C1,ABCC4,STK24,LRRFIP2,MSN,YES1,BACH1,SQSTM1,PDIA3,HSP90B1,DNAJB11,DNAJC3,LRP12,PNPLA8,ARPC2,NCOA3,SLC7A5,RPS6KC1,RANBP9,WDR26,ITCH,RAB10,TMOD3,UBC,NUMB,ERP44,PIR,RNF216,EIF4G2,MERTK,ACAP2,RAB1A,KIAA0232,CUL3,TMBIM6,PTP4A2,AGFG1,TXNRD1,WASHC2C,NUFIP2,GPATCH2L,PPP3R1,TALDO1,PRKAR1A,TMED7,VEZT,ZBTB20,AKR1C2,PPP1R15A,SCFD1,FOSL1,MAPK6,MORF4L1,GGNBP2,CORO1C,FXR1,SDE2,MEF2A,ANXA5,RTN4,WWP1,O…	5.EryP	Trisomy21vsGATA1s	3757
JIANG_MELANOMA_TRM8_CD4	8.94641	1e-50	9.81842105263158e-49	423	RPS4X,RPS26,FTH1,IFITM2,RPL7A,IFITM1,RPLP0,RPS3,EGR1,APRT,ZFP36L2,ARHGDIB,VIM,RPL10,RPL19,RPL28,GMFG,RPL12,EEF1A1,ANXA1,SOD1,RPS14,TSC22D3,PIM1,NOP53,RPL18A,SRGN,RPL6,EIF1,HINT1,ENO1,IL2RG,RPL8,RPL29,PABPC1,CORO1A,SRSF7,NR4A1,HLA-B,DDIT4,HCST,RPS5,DAZAP2,MZT2A,CDC37,RPL18,SARAF,ARPC1B,EEF1D,S100A11,RPL11,RPS15,RPSA,GPSM3,STAT4,BTF3,SNHG8,RPS12,NPM1,EEF1G,RPL36AL,RPS2,PRMT2,CITED2,PGK1,NFKBIA,HLA-…	6.EryMeg	NormalvsTrisomy21	3027
JIANG_MELANOMA_TRM8_CD4	8.88874	1e-50	9.94933333333333e-49	423	RPS4X,RPS26,FTH1,RPL7A,EGR1,RPL12,RPS3,RPS14,APRT,IFITM2,RPL18A,ZFP36L2,RPL10,RPLP0,RPL19,EEF1A1,SOD1,RPL6,NOP53,HSPA8,ENO1,TSC22D3,RPL28,EEF1G,RPL29,VIM,EEF1B2,GMFG,SRGN,RPL8,RPS5,RPS2,ARHGDIB,RPL18,RPS12,RPL11,C12orf57,ANXA1,RPS15,PABPC1,HINT1,CCDC85B,MZT2A,RPS28,LY6E,RPS7,TAGLN2,RPL3,S100A11,RPL13,FXYD5,RPSA,CDC37,NACA,FOSB,EEF1D,RPL32,BCAP31,EIF1,IL2RG,ARPC1B,RPL30,RPL5,RPLP1,NR4A1,TXNIP,ICAM…	5.EryP	NormalvsTrisomy21	2886
RODRIGUES_THYROID_CARCINOMA_ANAPLASTIC_UP	8.88714	1e-50	1.1134328358209e-48	692	CYTOR,FLNA,TGFB1,KMT2C,IL1RAP,VPS50,SEMA3C,MBNL1,USP15,ITGB1,RHOBTB3,PTBP3,CDYL,RSRC1,YWHAZ,IQGAP1,IGF2BP3,BTAF1,EIF4G2,TOP1,USP47,PIK3CA,OSBPL8,ACTR2,LPP,DCBLD2,ZNF644,FAR1,ITCH,DCUN1D1,TMOD3,PLP2,LNPEP,SLC7A5,APC,PTPN12,NIPBL,STRN,RUNX1,SP100,TANK,LCORL,CORO1C,FAF1,SMURF1,UBA6,USP34,CTSA,ELOVL6,TNFSF9,JPT1,STK4,SENP5,RNGTT,AMMECR1,STAG1,ZDHHC20,S100A10,MAPK1,ARFGEF2,ADAM10,HECTD1,CCDC88A,TXNRD1…	7.EMPP	Trisomy21vsGATA1s	3298
KIM_ALL_DISORDERS_OLIGODENDROCYTE_NUMBER_CORR_UP	8.88313	1e-50	2.19470588235294e-48	740	RPS4X,GAPDH,EEF2,CIRBP,HMGN1,ACTG1,RPS3,TKT,LAPTM4B,CA2,BIN1,HINT1,VIM,LGALS1,CCT8,RPL28,IER2,SPINT2,SUMO3,ATP5PO,IMPDH2,DNAJB1,CORO1A,SLC25A3,RACK1,PPP2R1A,UBB,DDOST,DAZAP2,RAN,AKR1A1,PEBP1,EIF3F,EIF3K,PPP1R16B,RPL8,GNAS,AHCY,RPL11,CSTB,ERP29,CAPNS1,MAGED2,SOD1,CCT7,PGK1,STAT4,ENO1,SERP1,EID1,CLTA,PUF60,ATP6V0C,MARCKSL1,ANXA6,TRIM28,EIF3G,CTDNEP1,ARF5,PTS,SLC25A6,SUMO2,TUBB4B,SNRPB,BEX4,USP11,CD…	7.EMPP	NormalvsTrisomy21	2785
KIM_BIPOLAR_DISORDER_OLIGODENDROCYTE_DENSITY_CORR_UP	8.87673	1e-50	2.19470588235294e-48	663	RPS4X,CIRBP,HMGN1,ACTG1,TKT,BIN1,HINT1,VIM,EEF1A1,CCNI,LGALS1,CCT8,SPINT2,IGFBP7,SUMO3,ATP5PO,CORO1A,SLC25A3,PPP2R1A,UBB,DAZAP2,ITM2A,SEC61B,RAN,AKR1A1,PEBP1,EIF3F,EIF3K,PPP1R16B,APEX1,RPL8,GNAS,AHCY,RPL11,PHB2,ERP29,CAPNS1,SRSF9,SOD1,PGK1,ENO1,EID1,CLTA,PUF60,ATP6V0C,MARCKSL1,ANXA6,HNRNPK,TRIM28,EIF3G,ARF5,PTS,SLC25A6,SUMO2,TUBB4B,BEX4,PSME1,CD81,BCL7B,RABAC1,ATP6AP1,VPS28,RPL36AL,MYL6B,ECH1,MYL…	7.EMPP	NormalvsTrisomy21	2784
MARSON_BOUND_BY_FOXP3_UNSTIMULATED	8.70093	1e-50	1.1134328358209e-48	1153	ARMC8,APLP2,TGFB1,JARID2,ARL15,CD84,DHRS3,FYB1,ZFP36L1,ELF1,SLC9A9,PTPRC,MBNL1,YES1,CLTC,P2RY14,SMAD3,MAP4K4,ZFAND6,YWHAZ,TP53INP1,SESTD1,SMYD3,NDFIP1,RAB2A,ACTR3,FCGR2A,TPST2,NCOA3,NCOR1,GPD2,WDR26,OSBPL8,ACTR2,ABHD2,PDK1,UBR1,KDM6A,RSRP1,TXNIP,ITCH,LCP2,TMOD3,TPP2,NGLY1,ARHGAP12,PPP2R5A,CAB39,ZC3HAV1,KLF6,EMP3,PICALM,DNAJB6,USP48,MEF2A,NUDT4,TIPARP,ARHGAP15,SPPL2A,HSP90B1,TES,HERC1,CENPC,CNOT2,…	7.EMPP	Trisomy21vsGATA1s	3297
MARSON_BOUND_BY_FOXP3_UNSTIMULATED	8.69549	1e-50	8.77529411764706e-49	1153	TGFB1,KLF6,APLP2,TP53INP1,PTPRC,DNAJB6,ZFP36L1,ACTR2,EMP3,YES1,SMAD3,JARID2,HSP90B1,ELF1,NDFIP1,ARMC8,FOSB,FYB1,RSRP1,TES,SESTD1,ARPP21,DHRS3,ITM2B,RHOB,YWHAZ,TPP2,SEPTIN6,TXNIP,PPP1CB,TAX1BP1,NCOA3,OSBPL8,WDR26,MBNL1,ITCH,RAB2A,ABHD2,WASF2,ZFAND6,UBE2H,LCP2,ARIH1,SEC14L1,TMOD3,SESN1,FCGR2A,TGFBR2,B4GALT1,ARL15,AMBRA1,VMP1,CLTC,ARHGAP12,DOK2,CCNY,LIMD2,CAB39,USP6NL,POLR2A,UVRAG,P2RY14,CUL3,HP1BP3…	5.EryP	Trisomy21vsGATA1s	3756
HOUNKPE_HOUSEKEEPING_GENES	8.66518	1e-50	9.94933333333333e-49	1108	PCBP2,SOD1,SERP1,EIF4A1,RBM8A,LAMTOR1,MRPS2,TRIM28,HINT1,ERGIC3,SLC25A5,PUF60,TPI1,EIF3G,EIF3K,COMT,EIF1AX,CTDNEP1,ATP5PF,SRM,MAZ,FKBP8,CDC37,APEH,NACA,PPP2R1A,EEF1D,MRPL57,BCAP31,C1orf43,EIF3D,PCBP1,TXN2,CDK4,NOB1,SRSF9,HSF1,APH1A,OTUB1,GPX4,ERP29,RPL7L1,HSP90AB1,GPI,ILF2,CNBP,RPL35A,ZNF593,SF3A2,MAP2K2,MYDGF,KEAP1,TOMM22,YWHAB,CLNS1A,RPN2,EIF3I,KDELR1,RAB9A,PSMD8,BTF3,CSNK2B,SMDT1,TMEM259,VPS51…	5.EryP	NormalvsTrisomy21	2885
GRAESSMANN_APOPTOSIS_BY_DOXORUBICIN_DN	8.66221	1e-50	8.77529411764706e-49	1743	CARMIL1,KLF6,DBN1,ARHGAP6,EPB41L4A,CHD7,LIMS1,NEAT1,OSBPL6,MSN,MTSS1,LRBA,CLIP2,YES1,PLP2,ZFAND3,JARID2,PTBP3,NDFIP1,RABGAP1L,TPM3,KMT2C,YWHAZ,TXNIP,DYRK1A,SPRY1,LPP,CTNNB1,ITCH,RAB2A,ERC1,DDX17,HIF1A,ARHGAP21,BNIP3L,STAG1,ARIH1,SEC14L1,SESN1,NUMB,DDX6,GABBR1,STAT5A,GRTP1,MAP4K3,PRMT2,AMBRA1,ALDOA,RBM39,ELOVL6,BRAF,MRTFA,LMBRD1,EXOC4,QKI,ATP11A,ARPC1B,ARID4B,CLASP2,XPR1,STAT5B,BAZ2B,PRNP,RBM25,IT…	5.EryP	Trisomy21vsGATA1s	3755
LASTOWSKA_NEUROBLASTOMA_COPY_NUMBER_DN	8.66131	1e-50	1.1134328358209e-48	784	APLP2,MACF1,ATXN7,LUZP1,NEAT1,PHACTR4,EPB41,UBR4,CTNNB1,CLASP2,BTAF1,VTI1A,PDZD8,RSRP1,CPEB2,NGLY1,LCOR,CTDSPL,PICALM,USP48,TBC1D5,PTEN,FAF1,TOP2B,JAK1,DNAJC6,UBE2E1,PRDM2,R3HCC1L,OSBPL9,TM9SF3,FOXJ3,PUM1,COL9A2,FRYL,TNKS2,CAMTA1,UVRAG,EIF4G3,ZC3H12C,RAB6A,ANKRD28,OXSR1,WDR11,MICU1,HP1BP3,VPS13D,RDX,CTBP2,SH3GLB1,GPBP1L1,ST3GAL3,ATG7,CCNL2,USP33,PBRM1,CNTN4,EDRF1,EFCAB14,XPNPEP1,RLF,SHOC2,EPS15,G…	7.EMPP	Trisomy21vsGATA1s	3296
JIANG_MELANOMA_TRM3_CD8	8.65365	1e-50	2.19470588235294e-48	419	AREG,RPS26,GAPDH,BHLHE40,HMGN1,IFITM2,IFITM1,ACTG1,RGS1,GMFG,CTSW,TPM4,SRGN,SLC25A5,ILF2,VIM,CLIC1,RBM8A,LGALS1,RBM3,CYB5R3,LSP1,TUBA1B,CORO1A,SLC25A3,ATP5F1B,TRAPPC1,UBB,ITM2A,SEC61B,RAN,IL2RG,HLA-B,PSMB8,ID2,LSM2,SOD1,PGK1,CD82,CTSC,ENO1,PIM3,EID1,CLTA,SH2D2A,PPDPF,ANXA6,HNRNPK,ZYX,CTSD,RILPL2,ARF5,MPG,SUMO2,MIR155HG,NPM1,SNRPB,ATP5PB,PRDX3,PSME1,MYL6,S100A11,HLA-A,B2M,ATP5MC2,RABAC1,RALA,ADGRG…	7.EMPP	NormalvsTrisomy21	2783
HOUNKPE_HOUSEKEEPING_GENES	8.64463	1e-50	8.77529411764706e-49	1108	MAX,DNAJB6,U2AF1,STK24,ACTR2,PDIA3,HSP90B1,DNAJB11,DNAJC3,JAK1,TPP2,TAX1BP1,ARPC2,CDC42SE1,CDC42,RANBP9,UBR4,PTEN,CTNNB1,ITCH,RAB2A,SPAG9,DDX17,BNIP3L,ERP44,PACSIN2,CALR,ZMIZ1,RNF216,ADIPOR2,EIF4G2,G3BP2,EIF2AK1,LAMP2,KDM2A,UBE2Q1,CHMP4B,VCP,CAB39,BZW1,RBM25,NPEPPS,TRIP12,CUL3,TMBIM6,HP1BP3,NT5C2,AP1G1,NUFIP2,NRBP1,RPN1,PBX2,FAM20B,SNX3,PPTC7,ARFGEF2,PRKAR1A,SF3B1,SENP5,BTBD1,MED21,NUS1,TRAM1,KRA…	5.EryP	Trisomy21vsGATA1s	3754
REACTOME_MEMBRANE_TRAFFICKING	8.58493	1e-50	1.24366666666667e-48	620	DNM3,ANK1,TUBA1C,STON2,CD4,ACTB,YWHAZ,KIFAP3,RHOBTB3,GJA4,ACTR2,CD55,STAM,ARPC3,HPS1,TRAPPC1,RAB10,SPTA1,CALM1,CAPZB,FNBP1L,TUBB1,DENND6B,CLTC,CTSZ,ARPC5,AGPAT3,NBAS,ARPC2,ARF3,RAB11A,ARPC4,MYH9,KIF2A,NAA38,PPP6R1,VPS25,PIP5K1C,RAB8A,TRAPPC10,UBC,VTI1A,ACTR3,SPTB,RAB5C,RABGEF1,YWHAB,AP2M1,TUBB2A,TGOLN2,YWHAH,RABEP1,MAP1LC3B,RAC1,AP1S2,RAB14,NAPA,FCHO2,CHMP4B,SNAP23,COPE,LNPEP,M6PR,VPS37A,ANKRD27,…	6.EryMeg	Trisomy21vsGATA1s	3167
HOUNKPE_HOUSEKEEPING_GENES	8.58309	1e-50	1.1134328358209e-48	1108	STK24,MAX,U2AF1,DNAJC3,UBR4,TRIP12,RANBP9,CTNNBL1,CTNNB1,RAB2A,EIF4G2,PDIA3,ACTR2,DDX17,ITCH,AP1G1,ERP44,PACSIN2,TPP2,PPP2R5A,CAB39,STIM1,DNAJB6,USP48,ADIPOR2,MYCBP2,PTEN,HSP90B1,RNF216,RPN1,USP14,PSMD1,RBM25,JAK1,DNAJB11,SENP5,FAM20B,HIPK1,NPEPPS,MAPK1,TM9SF3,ARFGEF2,DYNLRB1,TAX1BP1,WASL,ARNT,TNKS2,NUFIP2,SENP2,NUS1,CDC42SE1,MED13,TMEM245,CUL3,SPPL3,RARS2,RAB6A,KRAS,LARP4B,OXSR1,NPLOC4,EIF2AK1,R…	7.EMPP	Trisomy21vsGATA1s	3295
MARTENS_TRETINOIN_RESPONSE_DN	8.5692	1e-50	2.19470588235294e-48	762	FTH1,RPS4X,ZFP36L2,EIF1,CIRBP,HMGN1,ACTG1,RPS3,SRSF7,RPL7A,RPLP0,DIPK1B,HINT1,VIM,EEF1A1,PABPC1,RBM3,REST,RPL10,APRT,TUBA1B,IMPDH2,MICAL1,SOX4,RACK1,UBB,EIF5,RPL19,DDX5,CEBPB,RAN,IL2RG,LAT2,HSPA8,RPS14,JUN,RPL7L1,RPL11,PHB2,ERP29,CTSC,DDX3X,PNPLA2,IRAK3,S1PR4,MARCKSL1,SPN,RPS5,SYNGR2,HNRNPK,RBM15B,GRK2,TRIM28,PGLS,EIF3G,C1orf43,TAF7,MRPL57,MRPS7,RPL18A,B2M,MYC,MAZ,MYL6B,RPL18,CLEC11A,ZNF22,STOML2…	7.EMPP	NormalvsTrisomy21	2782
IBRAHIM_NRF1_UP	8.56715	1e-50	1.1134328358209e-48	409	RYR3,CYTOR,MIR4435-2HG,LRRFIP2,STAM,MAP4K4,HSPA5,EIF4G2,TPST2,PDIA3,WDR26,TP53BP2,SLC7A5,AREL1,TFG,AHCYL2,MARK3,SCFD1,MAP4,USP14,SDCBP,PTPN1,JAK1,DNAJB11,DNAJC6,TM9SF3,VEZT,SH3BGRL2,SENP2,GATAD2A,GRB2,PPP6R3,RTN4,LIPH,MACO1,RABEP1,PPP2CB,MAP2K1,MPZL1,TNPO3,KIDINS220,BNIP3,KIF5B,SPAG9,RAB1A,GLYR1,UBQLN1,MFN2,PTPN11,PSAP,TAF2,SNRK,RBM6,EIF3J,PCYT1A,ILRUN,B4GALT5,TBK1,DNAJA1,YWHAG,CDK12,RAB35,CMAS,D…	7.EMPP	Trisomy21vsGATA1s	3294
JIANG_MELANOMA_TRM3_CD8	8.55649	1e-50	9.81842105263158e-49	419	RPS26,IFITM2,GAPDH,AREG,CTSW,IFITM1,HMGN1,VIM,ACTG1,LGALS1,LSP1,TPM4,GMFG,BHLHE40,SOD1,SLC25A5,PKM,SRGN,ENO1,IL2RG,CYB5R3,CORO1A,ATP5F1B,RGS1,CLIC1,HLA-B,ATP5PF,TRAPPC1,PSMB8,RBM8A,TALDO1,CTSC,ATP5MC2,SLC25A3,RABAC1,FABP5,CLTA,S100A11,TPI1,UBE2L6,UBB,TMEM14C,NPM1,ARPC3,MDH2,PGK1,EID1,LSM2,HNRNPA1,RAN,ARPC2,ILF2,CTSD,PLP2,PSMC5,SEC61B,RBM3,ARF5,RALA,HNRNPK,SH3BGRL3,YWHAB,CD7,RILPL2,ITM2A,MPG,PSME1…	6.EryMeg	NormalvsTrisomy21	3026
ONKEN_UVEAL_MELANOMA_UP	8.55176	1e-50	1.1134328358209e-48	778	HERC2,LDLRAD4,MEIS2,MTSS1,PDLIM1,SLC2A3,STAM,RABGAP1L,PPP1R12A,CHD7,MACF1,LYN,CD55,CDC42BPA,NR4A2,PTPRC,ZMYND8,SMAD3,TYROBP,VPS13B,YWHAZ,HACD1,IQGAP1,LAMA5,RAB2A,BTAF1,ACTR3,TPST2,SOS1,NCOR1,TRAPPC10,STAT1,MAP4K3,NUMB,JMJD1C,AUH,TCF12,SMCHD1,S100A11,TPP2,ZEB2,EMP3,NCOA2,USP48,ITPR2,MARK3,GNPTAB,PTGS1,PTPRA,ELOVL6,RBM25,MSN,MTR,BAZ2B,PSME4,ARFGEF2,WWP1,YTHDF3,KIAA0232,TNKS2,ATP2B1,PHF21A,ASAP1,EFR…	7.EMPP	Trisomy21vsGATA1s	3293
REACTOME_TRANSLATION	8.49499	1e-50	9.94933333333333e-49	275	RPS4X,RPS26,EEF2,RPL7A,RPL12,RPS3,RPS14,RPL18A,RPL10,RPLP0,RPL19,EEF1A1,RPL6,RPL28,EEF1G,RPL29,EEF1B2,RPL8,RPS5,RPS2,RPL18,EIF4A1,RPS12,RPL11,TUFM,RPS15,MRPS2,PABPC1,RPL22L1,RPL41,EIF3F,EIF3G,RPS28,DDOST,EIF3K,RPS7,EIF1AX,RPL3,RPL13,RPSA,APEH,EIF3L,EEF1D,MRPL57,RPL32,EIF3D,RPL30,RPL5,MRPL3,RPLP1,RPS8,FARSA,OXA1L,MRPL12,RPL36AL,RPL35A,MRPL4,RPL36,MRPL52,MRPS18B,RPN2,EIF3I,MRPS7,MRPL27,RPS13,RPS24,…	5.EryP	NormalvsTrisomy21	2884
KRIGE_RESPONSE_TO_TOSEDOSTAT_24HR_DN	8.49214	1e-50	9.94933333333333e-49	998	RPS26,EGR1,IFITM2,ZFP36L2,SNHG5,SRGN,SLC39A3,FABP5,CA2,SYNGR2,IGFBP7,MYC,SOX4,LAPTM4B,RRP1B,RPL22L1,CCDC85B,RUVBL2,MATK,LY6E,SRM,MAZ,SLC40A1,JPT1,RRP1,FKBP4,LSM7,MRPL57,MFNG,RPL5,NDUFA11,DUS3L,DDX54,ATP5F1D,NME4,PARVB,PRMT1,TRAP1,FARSA,TOMM40,MRPL12,IMP3,NRROS,PES1,ZNF593,MRPL4,TOMM22,C1QBP,NME1,EXOSC5,CD59,ACY1,COX5A,HDDC2,CD81,IFRD2,EBPL,VKORC1,BOP1,DNAJB1,GRSF1,MRPS12,MICOS13,NHP2,POLD2,TIMM13…	5.EryP	NormalvsTrisomy21	2883
KRIGE_RESPONSE_TO_TOSEDOSTAT_6HR_UP	8.4907	1e-50	1.24366666666667e-48	890	PLP2,SLC2A3,TYROBP,ITM2A,MYL12A,ABCC4,ARMC8,HCST,FCER1G,LYZ,DBN1,RHOBTB3,CD55,PTH2R,TXNIP,PTPRC,BMP2K,CDC42BPA,FYN,RSRP1,PTBP3,PMVK,JAK1,LPP,GPSM3,NOL4L,NEAT1,CPEB2,ABHD2,YPEL5,LRP10,ITM2B,CPEB4,RPS6KC1,SLC39A3,ZNF641,NFIL3,LGALS1,ARL4A,PREX1,KLF10,SPRY1,ANXA3,MBD6,TTC7B,C18orf32,MT1F,MAP1LC3B,AP1S2,SP100,NCOA3,PNPLA8,CHFR,CCDC92,RBM4,LNPEP,CR1,NUMB,SPPL2A,AP1G2,UGGT1,STIM1,SSH1,ZER1,SYNJ1,STK4,R…	6.EryMeg	Trisomy21vsGATA1s	3166
JOHNSTONE_PARVB_TARGETS_3_DN	8.49042	1e-50	1.1134328358209e-48	847	RABGAP1L,SGMS1,ACTN1,PRKAR2B,CDC42BPA,PIK3CB,MBNL1,YES1,PTBP3,DNAJC3,ELL2,RSRC1,ATP2C1,ATP9B,CTNNB1,CDC42SE2,MAN2A1,AP1G1,DCUN1D1,PDK3,TCF12,ATF2,FOXN2,SLC7A5,SMCHD1,FBXW7,QKI,ORC4,DNAJB6,GLS,BMPR2,TIPARP,PTEN,MORC3,UBA6,ZNF273,PLEKHB2,TAX1BP1,STAM2,ZCCHC7,CDC42SE1,PPP1CB,PPP3CA,CUL3,ANKRD28,BLZF1,MID1,FBXO11,TNRC6B,TDG,G3BP2,CEP70,IFRD1,HOOK3,SENP7,MNAT1,PPM1B,SAR1A,KIF20B,UBAP2,LUC7L2,OXR1,ADK,…	7.EMPP	Trisomy21vsGATA1s	3292
HOUNKPE_HOUSEKEEPING_GENES	8.48534	1e-50	1.69568181818182e-48	1108	MAX,EIF4G2,STK24,DNAJB6,CTNNB1,PDIA3,DNAJC3,RAB2A,PACSIN2,ATP6V0E1,U2AF1,RPN1,UBR4,ACTR2,ADIPOR2,JAK1,VCP,CTNNBL1,DDX17,TRIP12,SENP5,PPP6R1,PPP2CB,STIM1,SON,TMEM245,FAM20B,DNAJA1,CDC37,TAX1BP1,NRBP1,RALA,MAP2K1,ARNT,NAPG,HP1BP3,NUS1,YWHAB,CREBBP,PPP2R5A,RARS2,RANBP9,UBE2Q1,NAPA,P4HB,PIP5K1C,THRAP3,AP1G1,EXOC2,GTF2E2,PCYT1A,RBM25,ITCH,USP48,RAB35,TNKS2,C1orf174,DCAF5,NPLOC4,HSP90B1,RNF216,STAT3,US…	7.EMPP	NormalvsGATA1s	3145
DAZARD_RESPONSE_TO_UV_NHEK_DN	8.45846	1e-50	1.1134328358209e-48	297	AUTS2,RABGAP1L,JARID2,PPP1R12A,MAP3K5,ELF1,BACH1,MED13L,ZMYND8,AFF1,MAST4,SMAD3,CDYL,VPS13B,FNBP1L,GSE1,DYRK1A,IGF2BP3,NCOA3,ARHGEF7,LPP,VPS13A,ATF2,QKI,STRN,TIPARP,PHLPP1,MORC3,CENPC,CNOT2,TMEM131L,E2F3,BAZ2B,USP6NL,FOXJ3,USP24,PUM1,FRYL,GCLC,KIAA0232,CREB3L2,FYN,ATP2B1,ZNF148,ZFC3H1,CLASP1,CBLB,NPIPB5,PRKCD,HELZ,DIDO1,PUM2,CTBP2,CREBBP,TLK2,SCAF11,FNDC3A,EDRF1,CHD9,PIKFYVE,SHOC2,RIF1,ZNF217,ELF…	7.EMPP	Trisomy21vsGATA1s	3291
MILI_PSEUDOPODIA_HAPTOTAXIS_DN	8.43236	1e-50	8.77529411764706e-49	674	TGFB1,APLP2,SPTLC2,VCL,FLNA,HSPA5,TLN1,PTTG1IP,NEAT1,TNFSF9,NID1,BSG,CST3,IQGAP1,SGMS1,HLA-A,SPNS1,SQSTM1,PDIA3,HLA-B,LRP12,CD9,SLC7A5,TGOLN2,FAM171A1,RPS10,WDR26,ITGB1,ARHGEF7,ANKRD11,PTGS1,PIM3,SLC22A23,B4GALT1,ATP11A,VCP,HSPG2,CTSZ,PAN3,TMBIM6,TSPAN14,RPN1,OBSL1,TXNDC11,SPPL2A,TMED7,ZFP36,GLG1,KANTR,GRN,ESYT1,EIF2AK3,NPTN,ZMYND8,ATP6V0A1,SCFD1,SON,DAG1,SERPINH1,DCBLD2,MYADM,CREB3L2,CD151,FBXO3…	5.EryP	Trisomy21vsGATA1s	3753
MARSON_BOUND_BY_FOXP3_STIMULATED	8.42545	1e-50	1.1134328358209e-48	950	ARMC8,APLP2,RABGAP1L,MAP3K5,FYB1,ZFP36L1,BACH1,SLC9A9,PTPRC,MBNL1,ROCK2,PTBP3,MAP4K4,ZFAND6,DYRK1A,NDFIP1,RAB2A,NFAT5,TPST2,NCOA3,PDIA3,GPD2,WDR26,OSBPL8,ABHD2,PDK1,UBR1,KDM6A,RSRP1,DENND4A,LCP2,TMOD3,LNPEP,ARHGAP12,PPP2R5A,CAB39,ZC3HAV1,KLF6,PICALM,USP48,ASH1L,USP8,TIPARP,HSP90B1,TES,HERC1,LCORL,CENPC,CNOT2,FAF1,JAK2,NPTN,SDCBP,GNG2,CITED2,OSBPL9,USP6NL,FOXJ3,SGPP1,ADAM10,WDR44,YTHDF3,SUSD6,SRRM…	7.EMPP	Trisomy21vsGATA1s	3290
MILI_PSEUDOPODIA_HAPTOTAXIS_UP	8.41051	1e-50	1.1134328358209e-48	514	PPP1R12A,LIMS1,UBR3,MBNL1,YES1,PDCD10,DCAF6,FNBP1L,AGTPBP1,EIF4G2,SOS1,NCOR1,PJA2,WDR26,ACTR2,NET1,AGFG1,PDK1,VPS13A,CAVIN2,FAR1,PIP4K2A,DCUN1D1,TCF12,ATF2,ERBIN,SMCHD1,CYB5R4,APC,QKI,NIPBL,NCOA2,STRN,MEF2A,ESCO1,TANK,COP1,CNOT2,RBM25,STAG1,TUT7,SEPTIN7,CAPZA1,MYEF2,ANKRD11,USP24,WWP1,YTHDF3,TAX1BP1,CD2AP,ZDHHC2,TNKS2,EFR3A,PPP1CB,ZNF326,PPP3CA,CUL3,CDKAL1,KRAS,MPP7,LTN1,CTBP2,SH3GLB1,CELF2,TLK2,…	7.EMPP	Trisomy21vsGATA1s	3289
BUYTAERT_PHOTODYNAMIC_THERAPY_STRESS_UP	8.40055	1e-50	1.24366666666667e-48	803	SLC2A3,SPTLC2,DHRS3,PTGS1,CD55,AKR1C1,STAM,KLF6,TXNIP,BACH1,TNFSF9,ELF1,CITED2,PTBP3,SQSTM1,PRKCD,WASHC2C,DNAJB6,PJA2,CLIP2,RHOB,ARHGAP12,NUDT4,TP53BP2,TFPI,YPEL5,SERPINH1,CDC42,RPS6KC1,KLF11,HDAC5,NFIL3,HERPUD1,DAAM1,KLF10,FOS,GSE1,STK10,RABGEF1,MED13L,TUBB2A,RABEP1,MAP1LC3B,TIPARP,IRF9,NCOA3,R3HCC1L,RTN2,TANC2,SNAP23,CDYL,INSR,NUMB,MAFG,IL15,DLGAP4,PDE4DIP,NCOA1,WIPI1,ABI1,BMP2,F11R,ABHD5,SLC33…	6.EryMeg	Trisomy21vsGATA1s	3165
BLALOCK_ALZHEIMERS_DISEASE_UP	8.39109	1e-50	8.77529411764706e-49	1615	TGFB1,GYPB,MAX,ASAH1,SPTLC2,ZBTB16,RHOBTB3,IL2RG,FLNA,CD164,ARHGAP6,AKR1C1,GPC4,PTTG1IP,ZFP36L1,MLC1,LRRFIP2,SERPING1,NID1,LDLRAD4,CLIP2,MACF1,YES1,C15orf39,COL18A1,IQGAP1,RUFY1,ZFAND3,LMNA,PTBP3,ARMC8,TES,SLC25A21,SEPTIN6,TXNIP,NCOA3,CCND3,SLC7A5,SNTA1,S100A4,ELF4,LPP,KLF2,RAB2A,PTGS1,SPAG9,WASF2,GADD45B,NFKBIA,RNF19A,C21orf91,RNF24,CTSH,BMP2K,STAG1,NUMB,DDX6,SP100,ERP44,PACSIN2,LAT2,PRMT2,ZMIZ1…	5.EryP	Trisomy21vsGATA1s	3752
DIAZ_CHRONIC_MYELOGENOUS_LEUKEMIA_UP	8.38945	1e-50	1.73279069767442e-48	1381	RHAG,LAT,TGFB1,PDLIM5,GATA1,KYNU,ITGA2B,TIMP1,PLP2,DLC1,ITM2A,FLNA,TAGLN2,FCGR2A,ZFP36L1,VCL,SNX3,CD36,CD63,EMP3,ATP6V0E1,NCF4,CFH,ARPC3,PFN1,MSN,LY6E,PTPN6,KIFAP3,HACD1,IL1RAP,S100A10,S100A6,RGS10,CAPNS1,CITED2,WDR1,PRKAR2B,ILK,PTGS1,PIP5K1B,UROD,XK,KEL,LMNA,ACTR2,FLOT2,TMBIM1,CD84,STK24,PIM1,CAPZB,ANXA1,FADS2,NFE2,ARF3,RSU1,CD55,EIF4G2,ATP5PO,PDCD10,CD7,DAD1,AP2M1,ZMYND8,HBG1,DNAJB6,LCP2,BTK,HD…	6.EryMeg	NormalvsGATA1s	3186
HAMAI_APOPTOSIS_VIA_TRAIL_UP	8.38097	1e-50	1.1134328358209e-48	646	RABGAP1L,CD55,ASAH1,FYB1,CDC42BPA,SEMA3C,FER,ITGB1,PDCD10,DNAJC3,AP3B1,RPS6KC1,ITFG1,AGTPBP1,SPECC1,USP47,NID1,STAT1,PJA2,ZNF407,PIK3CA,OSBPL8,PROS1,ZNF644,DCUN1D1,SLMAP,SMCHD1,APC,NIPBL,CCDC91,USP9X,USP48,ITPR2,MYCBP2,USP8,PTEN,HSP90B1,GNPTAB,CENPC,ATF7IP,TOP2B,DNAJB11,TRIM24,TUT7,MTR,MYEF2,ITPR1,BAZ2B,USP25,HECTD1,CCDC88A,WWP1,TAX1BP1,ZNF148,ARHGAP10,TRIM33,BLZF1,CROT,MID1,WDR11,PCCA,SETX,WRN,R…	7.EMPP	Trisomy21vsGATA1s	3288
BUYTAERT_PHOTODYNAMIC_THERAPY_STRESS_UP	8.35889	1e-50	1.69568181818182e-48	803	SLC2A3,BACH1,STAM,DHRS3,CD55,DNAJB6,PIM1,TXNIP,RPS6KC1,CITED2,MED13L,RABGEF1,ARHGEF7,PTBP3,GSE1,NCOA1,CLIP2,ARHGAP12,TFPI,CDYL,PTGS1,TNFSF9,SPTLC2,NUMB,MRTFA,HERPUD1,GCLC,PSEN1,TANK,SENP5,MORC3,PDE4DIP,TP53BP2,NUDT4,NCOA3,DNAJA1,RHOB,NDEL1,ZC3HAV1,ETS2,PRKCD,F11R,KLF11,YPEL5,NFAT5,WIPF2,CREBBP,MAP4K3,PJA2,CSNK1G1,WSB1,STK10,TXNRD1,AKR1C1,IGF1R,AKAP8L,ABHD5,IRF9,NFIL3,SOS1,SERPINH1,IBTK,PRRC2B,RBM…	7.EMPP	NormalvsGATA1s	3144
MITSIADES_RESPONSE_TO_APLIDIN_UP	8.35367	1e-50	8.77529411764706e-49	420	TIMP1,KLF6,TESC,SLC2A3,DNAJB6,TNFSF9,LDLRAD4,YES1,BACH1,SMAD3,SQSTM1,JARID2,FOSB,JAK1,RHOB,USP20,HERPUD1,PIP5K1B,WDR26,GNAS,CCNL1,KLF2,GADD45B,UBE2H,NFKBIA,ARIH1,ATAD2B,MAP4K3,STK17B,PNRC1,ARID4B,EZR,MCL1,RAPGEF2,MIR22HG,POLR2A,CD84,KDM6B,SUSD6,MKRN1,PDE3B,MORC3,TUT7,MAP1LC3B,SNRK,EIF2AK3,PPP1R15A,ATP6V0A1,FOSL1,RIOK3,PIGA,CENPC,ATF7IP,STAP1,FBXO34,CDC14A,IRF7,DUSP1,MBTPS1,GABARAPL1,MAP2K3,RBM4,L…	5.EryP	Trisomy21vsGATA1s	3751
LASTOWSKA_NEUROBLASTOMA_COPY_NUMBER_DN	8.35335	1e-50	1.24366666666667e-48	784	APLP2,LAMTOR1,UROD,MACF1,PPP1CA,SH3BGRL3,CAPZB,RHOA,RSRP1,CTDSPL,CAP1,JAK1,GALE,NEAT1,PTP4A2,CPEB2,TMEM50A,EPB41,HP1BP3,LUZP1,CDC42,MKNK1,ATXN7,ZC3H12C,NRDC,VTI1A,CNTN4,PGAM1,EFCAB14,ARHGAP1,HECTD3,ECE1,CLASP2,COL9A2,XPNPEP1,R3HCC1L,CMTM6,ACAD8,PHACTR4,RDX,CMPK1,UBR4,CTNNBIP1,LZIC,TXLNA,CEP104,LAPTM5,STK40,NDUFC2,EVA1B,TOP2B,TADA3,ZNF518A,BTAF1,RAB6A,SMIM12,MICU1,PDZD8,NGLY1,WDR11,RCAN3,FAF1,SCP2…	6.EryMeg	Trisomy21vsGATA1s	3164
OSMAN_BLADDER_CANCER_UP	8.35049	1e-50	1.24366666666667e-48	390	PDLIM5,KYNU,TGFB1,FLNA,FYB1,FCER1G,IQGAP1,RNH1,CCND3,MALAT1,PTPRC,SESTD1,RAB10,ABHD17A,ELF1,VASP,CITED2,FOXN2,ZMAT3,KMT2C,SLC44A1,NEAT1,PTP4A2,TMOD3,ARPC4,PDIA3,RPS6KC1,KLF2,ZNF641,ACTR3,STRN,TGOLN2,RAB14,SCAMP2,BAX,LNPK,LNPEP,SMG1,FGFR1OP2,SPPL2A,COQ2,IL15,SSH1,ZER1,STK4,TRAK2,ATG5,EIF4G1,ASB8,NNT,NCKAP1L,ZFYVE16,TUBB4B,TMED7,RIOK3,RMDN1,RECQL,TOP1,MOB1A,YWHAE,OXR1,PKM,WDR41,SCP2,CHST2,HSP90B1,U…	6.EryMeg	Trisomy21vsGATA1s	3163
MARSON_BOUND_BY_FOXP3_STIMULATED	8.32629	1e-50	1.24366666666667e-48	950	APLP2,ZFP36L1,OAZ1,FYB1,S100A6,ARMC8,HCST,RABGAP1L,SLC9A9,MAP3K5,TPST2,CCND3,KLF6,NDFIP1,ROCK2,GPD2,BACH1,PTPRC,ARPC1B,LIPH,RHOA,LCP2,FYN,SERF2,CITED2,PDK1,RSRP1,PTBP3,PMVK,CLIC1,CAP1,ARHGDIB,NRBP1,TMOD3,TMEM50A,ABHD2,CSK,HP1BP3,ARHGAP12,CROT,LRP10,PDIA3,ITM2B,PECAM1,LIMD2,RTN3,NRDC,ADD1,ARHGAP10,TGOLN2,WASF2,GNG2,ECE1,TIPARP,PPP2R5A,NCOA3,POLD4,GADD45B,CHMP4B,MFSD11,LNPEP,RAB2A,PPP1CB,CMPK1,JAK2…	6.EryMeg	Trisomy21vsGATA1s	3162
JIANG_MELANOMA_TRM3_CD8	8.32256	1e-50	9.94933333333333e-49	419	RPS26,CTSW,TMEM14C,IFITM2,SOD1,HMGN1,ENO1,VIM,GMFG,SRGN,GAPDH,FABP5,AREG,RBM8A,LSP1,ATP5F1B,CYB5R3,SLC25A5,TPI1,LY6E,ATP5PF,S100A11,ATP5MC2,MDH2,TUBA1B,RAN,OAZ1,IL2RG,TRAPPC1,EID1,ATP5F1D,RGS1,TALDO1,CLIC1,LSM2,GPI,IFITM1,MYL12B,NPM1,ILF2,CTSD,PKM,MRPL52,YWHAB,CTSC,BHLHE40,PSMD8,EIF6,PGAM1,COX5A,PPP1CA,SH3BGRL3,UBE2L6,PSMC5,ARPC3,TUBB,HERPUD1,CD7,CLTA,SNRPB,PPDPF,PSMB8,DRAP1,LGALS1,HLA-B,SH2D2A,U…	5.EryP	NormalvsTrisomy21	2882
REACTOME_MEMBRANE_TRAFFICKING	8.3019	1e-50	8.77529411764706e-49	620	RHOBTB3,STON2,CD55,STAM,DNM3,CD4,ACTR2,AGPAT3,RABGEF1,KIFAP3,ANK1,TRAPPC10,YWHAZ,ARPC2,TGOLN2,AP3B1,ANKRD28,TUBA1C,MYH9,RAB10,UBC,TFG,PACSIN2,HPS1,FCHO2,CLTC,EXOC4,ARF3,CHMP4B,RAB1A,USP6NL,CTSZ,ITSN2,FNBP1L,AGFG1,ARPC3,AP1G1,UBAP1,CAPZB,AP1S2,NBAS,YWHAG,PPP6R3,LNPEP,TMED7,MAP1LC3B,VTI1A,RAB5C,RAB8B,NAPA,RIN3,RIC1,RAB6A,CAPZA1,SCFD1,SPTA1,DENND4C,CUX1,DNM2,COPA,GGA1,WASL,TRAPPC1,DCTN1,DENND6B,GOLG…	5.EryP	Trisomy21vsGATA1s	3750
CUI_TCF21_TARGETS_2_DN	8.25712	1e-50	8.77529411764706e-49	830	SPTLC2,VCL,SLC2A3,IL2RG,MED12L,TP53INP1,PTPRC,PLXDC2,DNAJB6,CD55,LIMS1,NEAT1,ATP2A3,CELF2,MTSS1,LRBA,LYZ,NCOA4,NID1,PDE4DIP,MACF1,YES1,PARD3B,SGMS1,JARID2,YPEL5,ELF1,INF2,ARMC8,RABGAP1L,ELL2,JAK1,STAT1,KMT2C,WWC2,PTGER4,TXNIP,DIPK2A,AHNAK,CBFA2T3,RANBP9,OSBPL8,ITGB1,NPL,LPP,PIK3CA,NFKBIA,TMOD3,CPEB2,CPEB4,TGFBR2,BTAF1,PHLPP1,CDKN1C,MEF2C,MERTK,ACAP2,SGK3,FNDC3B,LMBRD1,HEATR5B,QKI,MCL1,FGD4,RAPGEF…	5.EryP	Trisomy21vsGATA1s	3749
JIANG_MELANOMA_TRM8_CD4	8.21055	1e-50	1.165e-48	423	LAT,IL2RG,ITM2A,SPN,FOSB,TMSB4X,S100A11,TXNIP,HCST,NR4A2,HLA-B,ZFP36L1,TAGLN2,AHNAK,B2M,PLP2,ZFP36,SLC2A3,CD4,NR4A1,FOS,PRMT2,ANXA1,NFKBIA,CCND3,ARPC1B,HLA-A,S100A4,KLF6,EMP3,GADD45B,S100A10,MT-ATP6,GPSM3,SH3BGRL3,STAT1,CITED2,DUSP1,TSC22D3,LAPTM5,RSRP1,JUNB,CDC37,PTGER4,MT-CO1,MALAT1,FYB1,PIM1,CORO1B,TPM3,ITM2B,MYL12A,ARL4A,ARHGDIB,MYADM,GMFG,LCP2,NDFIP1,DDX3X,PFN1,PTPRCAP,CSRNP1,RPS10,PRNP,SYTL…	5.EryP	NormalvsGATA1s	3646
KIM_BIPOLAR_DISORDER_OLIGODENDROCYTE_DENSITY_CORR_UP	8.20375	1e-50	9.81842105263158e-49	663	RPS4X,CIRBP,HMGN1,ATP5PO,VIM,IGFBP7,CAPNS1,SLC25A6,TKT,ACTG1,CCT8,LGALS1,RPL12,EEF1A1,AKR1A1,SOD1,AHCY,PKM,SUMO3,HINT1,ENO1,RPL8,RPL29,SPINT2,CORO1A,APEX1,EIF3K,VPS28,PHB2,TUFM,DAZAP2,PUF60,PPP1R16B,TALDO1,SLC25A3,EIF3F,EIF3G,OS9,RABAC1,CLTA,TPI1,ECH1,RPL11,UBB,CD81,RPL41,PPP2R1A,TRIM28,RPS12,BEX4,SRSF9,RPL36AL,UQCRC1,ARPC3,PGK1,EID1,CCNI,RAN,NUCB1,ARPC2,BIN1,ERP29,RNH1,LRPAP1,RPLP1,PSMC5,PSMB5,S…	6.EryMeg	NormalvsTrisomy21	3025
GRAESSMANN_APOPTOSIS_BY_DOXORUBICIN_DN	8.19413	1e-50	1.69568181818182e-48	1743	ARHGAP6,CARMIL1,MTSS1,CHD7,EPB41L4A,RABGAP1L,LIMS1,CDC42BPA,ROCK2,PRMT2,JARID2,PLP2,GLG1,YES1,MSN,CTNNB1,LTBP1,TXNIP,MAP3K5,RREB1,ARHGAP21,ATXN7,LMBRD1,RAB2A,OSBPL6,LPP,PFKL,NEAT1,PTBP3,RUNX1,RSRC1,CLIP2,PDK1,NET1,FADS2,ANGPT1,CNOT2,CTDSPL,PTPRA,FUT8,LRBA,GABBR1,NCOR1,PLD1,SPRY1,PTPN12,NUMB,FRRS1,DBN1,MRTFA,DDX17,CCDC88A,ATG5,ELOVL6,FOXN2,SRSF7,VTI1A,NDFIP1,RIPK1,SLC44A1,FER,GRTP1,CTCF,NUDT4,MBOA…	7.EMPP	NormalvsGATA1s	3143
HOUNKPE_HOUSEKEEPING_GENES	8.15341	1e-50	1.73279069767442e-48	1108	LAMTOR1,SNX3,MAX,ATP6V0E1,ARPC2,UROD,RNF167,ACTR2,RPN1,ADRM1,STK24,PPP6R1,TMBIM6,VCP,EIF4G2,DAD1,AP2M1,YWHAB,PSMD6,DYNLRB1,NRBP1,DNAJB6,CDC37,CALM1,CTDNEP1,TMEM50A,PRKAR1A,NAPA,VPS25,UBAC1,SOD1,COMT,JAK1,VTI1B,COPE,HIGD1A,ATP5PF,TMEM219,GPX4,TADA3,ARHGAP1,RAB1B,UBE2Q1,CMAS,RAB11B,EBAG9,UBE2F,SON,TAF10,CFL1,PDIA3,SMIM12,BCAP31,ZFYVE21,EIF2AK1,PIP5K1C,FBXW5,PRDX5,CNPPD1,OS9,CLPTM1,MORF4L1,GET3,HSD1…	6.EryMeg	NormalvsGATA1s	3185
MARSON_BOUND_BY_FOXP3_STIMULATED	8.14537	1e-50	8.77529411764706e-49	950	KLF6,APLP2,PTPRC,ZFP36L1,HCST,BACH1,PDIA3,NFAT5,HSP90B1,PTBP3,NDFIP1,ARMC8,FYB1,RABGAP1L,RSRP1,TES,ITM2B,PTGER4,SEPTIN6,PPP1CB,CSRNP1,TAB2,NCOA3,CCND3,TGOLN2,DYRK1A,OSBPL8,WDR26,OAZ1,MBNL1,RAB2A,ABHD2,SPAG9,WASF2,GADD45B,ZFAND6,REL,LCP2,ARIH1,TMOD3,SESN1,CYLD,ARHGAP12,ARPC1B,CHMP4B,LIMD2,MCL1,CAB39,USP6NL,CUL3,HP1BP3,SUSD6,SRRM2,KDM6A,NRBP1,TPST2,GNG2,CREB1,FBRS,ASH1L,LNPEP,PDK1,ZC3HAV1,SIPA1L1,T…	5.EryP	Trisomy21vsGATA1s	3748
SPIELMAN_LYMPHOBLAST_EUROPEAN_VS_ASIAN_DN	8.13492	1e-50	8.77529411764706e-49	584	PDLIM5,KLF6,ASAH1,CD164,PTPRC,ACTR2,CD63,PSAP,SQSTM1,PTBP3,KLF10,KIFAP3,CYB5R4,JAK1,ITM2B,RHOB,YWHAZ,TAX1BP1,PIP5K1B,TGOLN2,AP3B1,ARHGEF7,PTEN,CD46,SPAG9,WASF2,PDCD10,TFG,MEF2C,CLTC,G3BP2,DOK2,MCL1,RAB1A,PIAS1,TMBIM6,NFIL3,NFKB1,TXNRD1,UBAP1,SEL1L,MKRN1,SYK,PDE3B,SNX3,CREB1,SF3B1,MAP1LC3B,SKAP2,MED21,PTPN12,XPNPEP1,MKLN1,GLG1,TRAM1,NAPA,EIF2AK3,NPTN,RAB6A,SCFD1,RIOK3,SON,CNOT2,PTPN1,COPA,USP14,AT…	5.EryP	Trisomy21vsGATA1s	3747
IBRAHIM_NRF2_UP	8.12067	1e-50	1.24366666666667e-48	510	LRRFIP2,ABCC4,STK24,SPX,MSN,AKR1C1,BACH1,EIF4G2,TMBIM6,HSPA5,LRP12,RAB10,ANXA5,ARPC2,SQSTM1,PIR,CMAS,WASHC2C,PTP4A2,PRKAR1A,TMOD3,RANBP9,DNAJC3,KIF2A,PDIA3,TALDO1,RPS6KC1,YES1,RNF216,UBC,ACTR3,DNAJB11,YWHAB,NQO2,ABHD4,RABEP1,MORF4L1,RAB14,ERP44,IKBKG,NCOA3,PNPLA8,AKR1C2,FECH,M6PR,NUMB,MAFG,CMPK1,WDR26,OTULIN,GSR,CORO1C,KIAA0232,EIF3J,SENP2,STK40,AGFG1,NOCT,SLC7A5,MFSD12,STAU2,SDCBP,ITCH,SFMBT1,TM…	6.EryMeg	Trisomy21vsGATA1s	3161
JIANG_MELANOMA_TRM9_CD8	8.11781	1e-50	1.24366666666667e-48	522	CTSW,LDLRAD4,TMSB4X,IL2RG,TLN1,ZFP36L1,ITM2A,FYB1,NR4A2,MT-CO1,ALDOA,LIMS1,SPN,B2M,MYL12A,PFN1,MT-ATP6,CD63,BIN2,ACTB,HCST,MYL6,CD164,IQGAP1,YWHAZ,RHOC,CCND3,S100A10,MSN,RGS10,ACTR2,KLF6,WDR1,ILK,MACF1,PPP1CA,DOK2,SH3BGRL3,GNAS,PTPN6,CCL5,EIF4G2,TRAPPC1,PTPRC,ATP5F1E,ABHD17A,ELF1,TPM3,CALM1,CAPZB,ARPC1B,RHOA,PPP1R12A,LCP2,FYN,VASP,ARPC2,CLIC1,CAP1,JAK1,ARHGDIB,MAGED2,STOM,PRKAR1A,TMEM50A,MYH9,OST…	6.EryMeg	Trisomy21vsGATA1s	3160
SHEN_SMARCA2_TARGETS_UP	8.10166	1e-50	1.69568181818182e-48	419	HERC2,ARMC8,KIFAP3,GNAQ,MACF1,ACTR3,LMBRD1,RAB2A,NCOA1,ATP6V0E1,NPTN,PHKB,DCAF6,CENPC,APC,NCOR1,NUMB,DCP2,TRIP12,OSBPL8,TANK,NDFIP1,CTCF,ZFAND6,ORC4,SON,ITFG1,STAM2,GBE1,YPEL5,MAP4K3,WDR11,ANKMY2,PJA2,WSB1,RNF130,ECPAS,BAZ2B,SS18,CTR9,RNF38,ABI1,SETX,EFCAB14,MED21,CTNNA1,SCFD1,NFYC,SCAF8,MRTFB,KIDINS220,ARFGEF2,PTPN11,SOCS6,ROCK1,CAPZA2,CUL5,STX7,RAB6A,SOS2,PRKAR1A,NNT,SPTLC1,RALGAPB,TMEM131,IDE,…	7.EMPP	NormalvsGATA1s	3142
JIANG_MELANOMA_TRM9_CD8	8.10149	1e-50	8.77529411764706e-49	522	KLF6,TMSB4X,ITM2A,MT-ATP6,NR4A2,IL2RG,CD164,TLN1,PTPRC,SPN,LIMS1,ZFP36L1,CELF2,ACTR2,HCST,MSN,B2M,CD63,LDLRAD4,MACF1,BIN2,CTSW,IQGAP1,HLA-A,PDIA3,HLA-B,YPEL5,ELF1,FYB1,MT-CO1,JAK1,TPM3,CDC42SE2,ITM2B,YWHAZ,PTGER4,HLA-C,TAX1BP1,CSRNP1,ARPC2,CCND3,PPP1R18,RHOC,CDC42,PTPN6,MBNL1,GNAS,SPRY1,MYH9,GADD45B,MAP3K8,REL,LCP2,PPP1R12A,ALDOA,STK17B,MAGED2,EIF4G2,PNRC1,G3BP2,DOK2,SH3BGRL3,ARPC1B,MCL1,BZW1,S10…	5.EryP	Trisomy21vsGATA1s	3746
GABRIELY_MIR21_TARGETS	8.08571	1e-50	1.1134328358209e-48	284	GNAQ,UBR3,RHOBTB3,PTBP3,ATAD2B,NFAT5,RFX7,USP47,GPD2,ACTR2,OSBPL3,VPS13A,ARHGAP21,ATF2,APC,NIPBL,WWC2,MYCBP2,BMPR2,PLD1,LCORL,USP34,UGGT1,ZNF292,MYEF2,FBXL17,TGFBR2,RNF38,HECTD1,SESN1,LMBR1,ZNF326,CUL3,TRIM33,ANKRD28,EIF2AK3,RAB3GAP2,FBXO11,ATP11B,TNRC6B,RASGRP3,TRPM7,CEMIP2,PAN3,SCAF11,WNK1,PBRM1,ACAP2,ARFGEF1,TACC1,TPM1,SNX13,CCDC14,MAP3K2,GOLGA4,SRPK2,ZMYM2,SMC5,MYO9A,RALGPS2,SLC5A3,DLG1,ZBTB3…	7.EMPP	Trisomy21vsGATA1s	3287
SPIELMAN_LYMPHOBLAST_EUROPEAN_VS_ASIAN_DN	8.07749	1e-50	1.24366666666667e-48	584	PDLIM5,ASAH1,MEF2C,PIP5K1B,CD63,CD164,SNX3,YWHAZ,KIFAP3,PDCD10,ACTR2,ATP6V0E1,KLF6,ILK,DOK2,SLC16A3,PTPRC,TMBIM6,PSAP,PDK3,CLTC,ARPC5,PTBP3,SQSTM1,CAP1,JAK1,GLG1,LGMN,SNRPN,CD46,RHOB,KIF2A,ORC4,ITM2B,NFIL3,PDE3B,KLF10,TGOLN2,ANXA11,WASF2,MAP1LC3B,G3BP2,PTPN12,SKAP2,NAPA,SYK,XPNPEP1,CDYL,C1D,M6PR,CMPK1,PDIA5,AP2B1,RALB,AP3B1,SEMA4D,ATG5,USP8,ARHGEF7,RAB6A,MKRN1,BABAM2,NPTN,NDUFS4,MICU1,HSD17B12,TA…	6.EryMeg	Trisomy21vsGATA1s	3159
REACTOME_MEMBRANE_TRAFFICKING	8.06679	1e-50	1.1134328358209e-48	620	DNM3,ANK1,STON2,STAM,KIFAP3,CD55,NBAS,RAB10,RHOBTB3,CLTC,AP3B1,EXOC4,FNBP1L,YWHAZ,RABGEF1,CD4,ACTR3,VTI1A,SPTA1,TRAPPC10,ACTR2,AGFG1,DENND4A,MAN2A1,AP1G1,PACSIN2,LNPEP,TUBA1C,TFG,PICALM,ANKRD27,FCHO2,SCFD1,AGPAT3,DENND1A,MYH9,COG5,TRAPPC9,DENND4C,AP2B1,DNAJC6,CAPZA1,HPS1,USP6NL,PUM1,WASL,UBAP1,DNM2,RIC1,STAM2,GJA4,RIN3,GRB2,RAB6A,VPS37A,ANKRD28,RAB3GAP2,TUBB1,PPP6R3,SEC31A,GALNT1,RABEP1,KIF20B,PI…	7.EMPP	Trisomy21vsGATA1s	3286
ENK_UV_RESPONSE_KERATINOCYTE_UP	8.05626	1e-50	2.19470588235294e-48	510	AREG,EIF1,RPS3,MYCN,EIF4A1,ETS2,HLA-E,ZFP36,GSTP1,CCNI,LGALS1,RPL28,RPL10,IER2,MAFF,SF3A1,APRT,BTG1,JUNB,JUP,RACK1,PPP2R1A,UBB,CDC37,EIF5,RPL19,IL1B,CEBPB,TSC22D1,HLA-B,TNFAIP3,COMT,ERGIC3,EIF3F,EIF3K,FOS,RPL8,GNAS,PSMB8,PHB2,EIF3I,MAGED2,ENO1,JUND,VAT1,CLTA,ATP6V0C,RPS5,DUSP1,TRIM28,DNAJB6,EIF3G,CTSD,CAPG,MPG,TAF7,TUBB4B,SNRPB,PSME1,S100A11,HLA-A,RPL18A,B2M,RABAC1,ECH1,RPS15,ATP6V0E1,RPL18,UQCRC…	7.EMPP	NormalvsTrisomy21	2781
REACTOME_POST_TRANSLATIONAL_PROTEIN_MODIFICATION	8.03817	1e-50	1.24366666666667e-48	1370	TGFB1,TIMP1,PRKN,APLP2,HERC2,ANK1,CST3,TUBA1C,NR4A2,ANKRD9,ACTB,SNX3,CTSA,NPL,LY6E,DAD1,LTBP1,TPST2,CD55,STAM,PROS1,TRAPPC1,ZBTB16,RAB10,SPTA1,RPN1,ADAMTS3,CDKN2A,ADRM1,CALM1,CAPZB,RHOA,TUBB1,FUT8,SMAD3,CTSZ,SQSTM1,ARF3,CMAS,USP20,RAB11A,PTP4A2,NUCB1,PSMD6,DCAF6,DNAJC3,DDX17,FUCA1,MGAT4B,DAG1,CFP,PPP6R1,USP15,PDIA3,GALNT10,RAB8A,ATXN7,THBS1,VCP,TRAPPC10,LGALS1,UBE2F,UBC,SPTB,RAB5C,CNTN4,FUCA2,TUB…	6.EryMeg	Trisomy21vsGATA1s	3158
KRIGE_RESPONSE_TO_TOSEDOSTAT_24HR_UP	8.03586	1e-50	1.69568181818182e-48	734	SLC2A3,CD55,CDC42BPA,RHOBTB3,TYROBP,PRMT2,PTH2R,PLP2,TXNIP,CPEB4,RPS6KC1,TES,LPP,NEAT1,PTBP3,SCAF4,BMP2K,NCOA1,PTPRC,SP100,IFRD1,HCST,LGALS1,MAML3,KLHL2,PREX1,JAK1,NUMB,ABHD2,CPEB2,DBN1,RSRP1,FGD3,TANK,BIN2,SYNJ1,SPPL2A,ATAD2B,LNPEP,UGGT1,GPCPD1,STIM1,EHBP1L1,NCOA3,PNPLA8,F11R,FYN,YPEL5,NFAT5,FCER1G,SLC12A6,WSB1,ITPR2,CR1,NFIL3,BAZ2B,SQSTM1,ZNF641,DCAF5,TSC22D3,STAT2,SLC25A24,ZNF518A,NOL4L,PPP2R3…	7.EMPP	NormalvsGATA1s	3141
MILI_PSEUDOPODIA_CHEMOTAXIS_DN	8.03374	1e-50	8.77529411764706e-49	453	KLF6,APLP2,VCL,MALAT1,HSPA5,TLN1,NEAT1,TNFSF9,PSAP,SGMS1,HLA-A,SPNS1,SQSTM1,PDIA3,LRP12,FOSB,TXNIP,CD9,FAM171A1,RPS10,WDR26,ITGB1,ANKRD11,CTNNB1,PTGS1,PIM3,ZMIZ1,RBM39,FOS,LMBRD1,CCNY,VCP,PRNP,PAN3,KDM6B,SNX29,SEL1L,TRA2A,SERPINE1,RPN1,MAN2B1,OBSL1,CTNNA1,PPP6R3,SPPL2A,TMED7,ZFP36,GLG1,TRAM1,CLIC1,GRN,ESYT1,EIF2AK3,ZMYND8,ADD1,SCFD1,MACO1,SON,SNX14,PFKL,DAG1,CUX1,AREL1,GGNBP2,USP14,ABCC1,SLC19A2,…	5.EryP	Trisomy21vsGATA1s	3745
WAKABAYASHI_ADIPOGENESIS_PPARG_RXRA_BOUND_8D	8.03321	1e-50	1.24366666666667e-48	830	DLC1,ASAH1,CST3,CD36,ABCC4,LMNA,ARMC8,NID1,LTC4S,CD151,FADS2,DYNLRB1,PTTG1IP,TXNIP,PTPN6,GSN,HSPA5,RPN1,BMP2K,ZMYND8,GNAI2,EHBP1L1,SNRPD3,STAT1,STOM,PTP4A2,NET1,MGAT4B,ESYT1,RNASET2,LUZP1,LMBRD1,YPEL5,TALDO1,ATP6V0C,KLF11,TBXAS1,YWHAB,PFKL,ZFYVE21,MBD6,RABEP1,REEP5,ECE1,G3BP2,CAMK1,RNFT1,TIPARP,ADIPOR2,PBX2,POLD4,PNPLA8,ACADS,MOCS2,LNPEP,SERPINE1,PNPLA2,ZBTB38,MYLK,CMPK1,QKI,ITSN1,RRAS,ABI1,STAT6…	6.EryMeg	Trisomy21vsGATA1s	3157
IBRAHIM_NRF1_UP	8.02844	1e-50	1.24366666666667e-48	409	CYTOR,MIR4435-2HG,LRRFIP2,ALDOA,RYR3,TPST2,STAM,EIF4G2,TMBIM6,HSPA5,PSAP,TPM3,LIPH,GSTP1,JAK1,CMAS,PSMD6,TP53BP2,BNIP3,PDIA3,TALDO1,DNAJB11,NQO2,ABHD4,SCPEP1,RABEP1,ECE1,KIAA0930,RAB14,AHCYL2,SH3BGRL2,WDR26,MAP4K4,EIF3J,SENP2,SLC7A5,CDV3,SDCBP,GRB2,RAB35,AREL1,TFG,CYREN,MPZL1,PKM,ANP32E,FYTTD1,PPP6R3,PTPN1,SCFD1,KIDINS220,MFN2,MAP4,MAP2K1,UBE2V1,ME1,MCUR1,MARK3,PPIF,PPP2CB,GLYR1,RPAP3,MAPRE1,RTN4…	6.EryMeg	Trisomy21vsGATA1s	3156
KRIGE_RESPONSE_TO_TOSEDOSTAT_6HR_DN	8.01376	1e-50	9.94933333333333e-49	909	RPS26,IFITM2,ZFP36L2,SNHG5,SRGN,FABP5,CA2,SYNGR2,IGFBP7,LSP1,MYC,SOX4,LAPTM4B,RRP1B,CCDC85B,MATK,LY6E,SRM,MAZ,SLC40A1,JPT1,RRP1,FKBP4,LSM7,MRPL57,MFNG,NDUFA11,DUS3L,DDX54,NME4,RCSD1,FARSA,MRPL12,IMP3,NRROS,PES1,ZNF593,PRMT2,MRPL4,TOMM22,C1QBP,CD59,COX5A,HDDC2,CD81,EBPL,VKORC1,DNAJB1,GRSF1,MRPS12,MICOS13,NHP2,POLD2,TIMM13,PEBP1,CENPV,SORD,SLA,ANTKMT,PTGES2,VAMP8,AIF1,ALG1,PGK1,ARHGDIA,MRPS34,NOC2L…	5.EryP	NormalvsTrisomy21	2881
KIM_ALL_DISORDERS_OLIGODENDROCYTE_NUMBER_CORR_UP	8.00777	1e-50	9.81842105263158e-49	740	RPS4X,GAPDH,EEF2,CIRBP,RPS3,HMGN1,IMPDH2,ATP5PO,VIM,CAPNS1,SLC25A6,TKT,ACTG1,CCT8,LGALS1,RPL28,LAPTM4B,AKR1A1,SOD1,AHCY,SUMO3,RACK1,DDOST,HINT1,ENO1,RPL8,RPL29,SPINT2,CORO1A,CA2,SERP1,EIF3K,VPS28,TUFM,DAZAP2,PUF60,CTDNEP1,PPP1R16B,TALDO1,SLC25A3,EIF3F,EIF3G,OS9,RABAC1,LSM7,CLTA,TPI1,ECH1,RPL11,UBB,CD81,STAT4,RPL41,PPP2R1A,TRIM28,RPS12,BEX4,RPL36AL,UQCRC1,PGK1,CCT7,RUVBL2,EID1,SUPT4H1,CSTB,RAN,NUC…	6.EryMeg	NormalvsTrisomy21	3024
KOINUMA_TARGETS_OF_SMAD2_OR_SMAD3	8.00391	1e-50	8.77529411764706e-49	813	PDLIM1,KLF6,VCL,MALAT1,STON2,HSPA5,TLN1,AKR1C1,CD55,ZFP36L1,ACTN1,MBOAT2,CLIP2,BACH1,C15orf39,PLP2,SGMS1,SMAD3,PTBP3,RNH1,KLF10,TES,TAGLN2,SESTD1,ELL2,DHRS3,KMT2C,YWHAZ,TAX1BP1,CSRNP1,SMG1,SLC7A5,RHOC,AHNAK,ITGB1,MBNL1,MYH9,ABHD2,SPAG9,WASF2,GLS,JMJD1C,F11R,ARHGAP21,TMOD3,UBC,FCHO2,CLTC,QKI,CHMP4B,MCL1,PRNP,TMBIM1,RBM25,IRF2BP2,S100A10,KLF7,GSE1,NFIL3,NFKB1,SUSD6,TXNRD1,MBOAT1,SERPINE1,SMURF1,SER…	5.EryP	Trisomy21vsGATA1s	3744
CHEN_HOXA5_TARGETS_9HR_UP	7.96368	1e-50	8.77529411764706e-49	217	KLF6,BACH1,KLF10,FOSB,NCOA3,RELB,CCNL1,GADD45B,NFKBIA,JMJD1C,C21orf91,ARIH1,PPP1R12A,ATAD2B,RBM39,FOS,ARID4B,MCL1,CAB39,NFIL3,ETS2,MORC3,TUT7,MARK3,TIPARP,CNOT2,ZNF267,CENPC,ATF3,RLF,TANK,FAM13B,IRF7,GABARAPL1,IER2,CRY1,TLK2,AKIRIN1,SMCHD1,PNRC2,WAC,BIRC2,ZNF107,KDM3A,TDG,CDK17,STRN3,TNFAIP3,NEMF,KMT5B,PTBP2,GAD1,RYBP,YY1AP1,PTGS2,CCNT2,IFRD1,EIF5,FEM1C,DCLRE1C,SREK1,ZNF131,CHD9,JUNB,ADNP,ZNF44,O…	5.EryP	Trisomy21vsGATA1s	3743
SPIELMAN_LYMPHOBLAST_EUROPEAN_VS_ASIAN_DN	7.94578	1e-50	1.1134328358209e-48	584	PDLIM5,PIP5K1B,KIFAP3,MEF2C,ASAH1,PTPRC,PDE3B,PDCD10,CLTC,PTBP3,CDYL,AP3B1,CD46,YWHAZ,GLG1,ARHGEF7,ACTR2,MAN2A1,PDK3,CYB5R4,PTPN12,TFG,ORC4,KLF6,PICALM,SCFD1,USP8,PTEN,CNOT2,USP14,NPTN,CD164,PTPN1,JAK1,RNGTT,AP2B1,ITPR1,TXNRD1,TAX1BP1,ATG5,UBAP1,SLC16A3,ZNF148,RAB6A,PIAS1,EIF2AK3,SEMA4D,OXSR1,MICU1,BABAM2,NFATC3,CD63,PUM2,MKLN1,G3BP2,UBE2K,MED21,SCAF11,MAP2K1,ARFGEF1,XPNPEP1,SYK,FMR1,TGOLN2,STK17…	7.EMPP	Trisomy21vsGATA1s	3285
MARSON_BOUND_BY_FOXP3_UNSTIMULATED	7.93987	1e-50	1.69568181818182e-48	1153	TGFB1,ARMC8,APLP2,ZFP36L1,DHRS3,CD84,FYB1,FOSB,SLC9A9,DNAJB6,JARID2,POLR2A,FCGR2A,MAP4K4,YES1,TPST2,TXNIP,ACTR3,TP53INP1,CITED2,TES,RAB2A,LCP2,VEZT,GPD2,P2RY14,PTPRC,CLTC,PDK1,CNOT2,ARHGAP12,NPTN,ACTR2,CENPC,NCOR1,ARHGAP10,ABHD2,SMAD3,RSRP1,FGD3,PSEN1,OSBPL8,NDFIP1,SPPL2A,ARPP21,RIPK1,CMTM6,DOK2,ZFAND6,NUDT4,GNG2,TGFBR2,TMEM164,SESTD1,JAK2,ADD1,MBNL1,NCOA3,B4GALT1,KIF5B,TAX1BP1,RHOB,TUBB4B,ZC3HAV…	7.EMPP	NormalvsGATA1s	3140
DACOSTA_UV_RESPONSE_VIA_ERCC3_COMMON_DN	7.93246	1e-50	1.24366666666667e-48	457	DLC1,MEIS2,STK24,IL1RAP,ZNF804A,STAM,GNAQ,KLF6,ROCK2,JARID2,ZMYND8,FNBP1L,PPP1R12A,FUT8,SMAD3,CDC42BPA,FYN,PJA2,RCOR1,SEMA3C,ARHGAP12,KIF2A,TP53BP2,LYN,MID1,TRIP12,KLF10,FAM171A1,MED13L,PTPRA,PTPN12,CLASP2,AUH,TIPARP,NCOA3,R3HDM2,CDYL,SERPINE1,NUMB,QKI,ITSN1,EVI5,ANKMY2,NCOA1,ABI1,IGF2BP3,TJP2,ATAD2B,ARHGEF7,PCMT1,RAB6A,STAU2,AFF1,CKAP5,NEDD4,DYRK1A,RB1,NPEPPS,MAN2A1,PIP4K2A,AGAP1,G6PD,RNGTT,MYCB…	6.EryMeg	Trisomy21vsGATA1s	3155
CUI_TCF21_TARGETS_2_DN	7.92672	1e-50	1.1134328358209e-48	830	MED12L,MTSS1,ARMC8,PLXDC2,SLC2A3,VCL,LRBA,RABGAP1L,CD36,SGMS1,KMT2C,PARD3B,JARID2,MACF1,CD55,MEF2C,LIMS1,ELF1,SPTLC2,DIPK2A,PTPRC,UBR3,RREB1,YES1,MAST4,ATXN7,ITGB1,CDYL,ELL2,IL2RG,NEAT1,RANBP9,PLEKHG1,TP53INP1,BTAF1,CPEB4,GALNT10,NCOR1,GPD2,NID1,STAT1,NPL,INF2,CBFA2T3,LMBRD1,PIK3CA,OSBPL8,PROS1,AGFG1,LPP,VPS13A,KDM6A,CAVIN2,TXNIP,CPEB2,KDM4C,TMOD3,FOXN2,LNPEP,CDC14A,ATG10,QKI,ZEB2,PTPN12,ZC3HAV1,…	7.EMPP	Trisomy21vsGATA1s	3284
SENESE_HDAC3_TARGETS_UP	7.92494	1e-50	8.77529411764706e-49	475	KYNU,KLF6,IL1RAP,PAPPA,MALAT1,NR4A2,SLC2A3,AKR1C1,CD55,ABCC4,NEAT1,ACTR2,BACH1,IQGAP1,SQSTM1,NFAT5,PTBP3,JAK1,RHOB,TRAPPC10,YWHAZ,PDGFC,SMG1,RHOC,MBNL1,CD46,GTDC1,NFKBIA,GLS,JMJD1C,ATP2B1,RNF19A,TMOD3,CPEB2,CPEB4,TGFBR2,B4GALT1,FCHO2,CDKN1C,G3BP2,AFF4,ARF3,TNIK,EZR,MCL1,ZMAT3,PLEKHB2,ATP6V1A,CEP170,ETS2,STK10,GNG2,STRN,PPTC7,ASH1L,SF3B1,PLCXD1,ZBTB20,ZNF644,PTPN12,RAB8B,MAP3K2,RANBP2,TNKS2,TPP1,I…	5.EryP	Trisomy21vsGATA1s	3742
FISCHER_DREAM_TARGETS	7.90937	1e-50	1.1134328358209e-48	907	MEIS2,SCLT1,RSRC1,EXOC4,DYRK1A,TP53INP1,BIRC6,TOP1,PPP3R1,GPD2,STAT1,NET1,ABHD2,FAR1,ATF2,RAD51B,SMCHD1,TUBA1C,NIPBL,DCP2,RUNX1,ANKRD17,LCORL,CENPC,FAF1,ARID2,ZNF273,ATF7IP,JPT1,AP2B1,STAG1,FBXL20,NUFIP2,CUL3,GATAD2A,CDKAL1,EIF2AK3,ACACA,CKAP5,WRN,SS18,RDX,CEP192,IFRD1,AHCTF1,POU2F1,KIF20B,PBRM1,HS2ST1,MSH3,TNPO3,CCDC14,RIF1,OPA1,FKBP5,EZH2,SPAG9,ZNF518A,CEP85,CDR2,SLC25A36,HNRNPA2B1,SMC5,CEP83,Z…	7.EMPP	Trisomy21vsGATA1s	3283
DACOSTA_UV_RESPONSE_VIA_ERCC3_COMMON_DN	7.90913	1e-50	1.69568181818182e-48	457	DLC1,MEIS2,IL1RAP,STAM,ZNF804A,GNAQ,STK24,PPP1R12A,CDC42BPA,ROCK2,ZMYND8,LYN,JARID2,FNBP1L,SEMA3C,FAM171A1,RCOR1,MED13L,ACSL3,ARHGEF7,RUNX1,NCOA1,CNOT2,ARHGAP12,MAP2K4,PTPRA,FUT8,CDYL,PTPN12,NUMB,SMAD3,TRIP12,OSBPL8,SRSF7,TP53BP2,ATAD2B,MBNL1,NCOA3,E2F3,CREB3L2,GBE1,CLASP2,MID1,MAP2K1,FYN,STAU2,FRYL,CREBBP,ANKMY2,PJA2,PTPN2,SOS1,IBTK,BAZ2B,ITSN1,DYRK1A,ATP2B1,AUH,MAN2A1,AKAP9,RBM6,CKAP5,PRRC2C,ZN…	7.EMPP	NormalvsGATA1s	3139
ENK_UV_RESPONSE_KERATINOCYTE_DN	7.89937	1e-50	1.1134328358209e-48	473	GNAQ,SLC2A3,MACF1,KIFAP3,DHRS3,MAP3K5,SEMA3C,ZMYND8,AFF1,MBNL1,YES1,ROCK2,CLTC,CD46,TRIP12,ATP2C1,IGF2BP3,ACTR3,TPST2,NCOA3,ARHGEF7,ACTR2,DDX17,DDX3Y,ACSL3,AUH,MAN2A1,PICALM,MARK3,SCFD1,ATP6V1A,MAP4,SP100,COG5,CNOT2,USP14,NPTN,TOP2B,PTPN1,NPEPPS,TGFBR2,CD2AP,CTNNA1,ZNF148,KRAS,STK3,RANBP2,RDX,PUM2,GBE1,G3BP2,TLK2,SCAF11,WNK1,ATP2A2,FNTB,DHX9,ARFGEF1,TACC1,FMR1,CUX1,FKBP5,EPS15,GOLGA4,SNX4,SIAH1,A…	7.EMPP	Trisomy21vsGATA1s	3282
JIANG_MELANOMA_TRM9_CD8	7.89618	1e-50	9.94933333333333e-49	522	RPS3,CTSW,APRT,IFITM2,ZFP36L2,EEF1A1,SOD1,HMGN1,HSPA8,ENO1,RPL28,SRGN,GAPDH,ARHGDIB,AREG,RPS12,RBM8A,LSP1,C12orf57,VPS28,PABPC1,TSEN54,CCDC85B,TPI1,MATK,ECH1,FKBP8,RPL13,CDC37,PYURF,PNPLA2,BCAP31,IL2RG,MFSD10,ANXA11,TRAPPC1,ARPC1B,PCBP1,EID1,RPLP1,NR4A1,RAC2,CTDSP1,RGS1,CLIC1,MT-CO2,PTPN6,LSM2,MT-ND4L,GPI,IFITM1,MYL12B,NPM1,CNBP,SF3A2,YWHAB,CRIP1,CTSC,SRSF7,PRR13,HNRNPF,DAZAP2,PGAM1,PPP1CA,SH3BGR…	5.EryP	NormalvsTrisomy21	2880
MILI_PSEUDOPODIA_HAPTOTAXIS_UP	7.89113	1e-50	8.77529411764706e-49	514	LIMS1,CELF2,ACTR2,YES1,PJA2,CYB5R4,AGTPBP1,SEPTIN6,PPP1CB,TAX1BP1,WDR26,MBNL1,ANKRD11,HIF1A,STAG1,PDCD10,PPP1R12A,EIF4G2,MYEF2,QKI,BZW1,RBM25,CUL3,FNBP1L,PTP4A2,AGFG1,ZNF326,UBR3,MKRN1,NET1,NCOR1,NCOA2,STRN,TUT7,SF3B1,BTBD1,ESCO1,PDK1,RAB8B,KRAS,TNKS2,CPSF6,DCUN1D1,CAPZA1,APC,RIOK3,CNOT2,CAVIN2,SH3GLB1,DCAF6,FXR1,TANK,MEF2A,TCF12,NIPBL,GPBP1,WWP1,OPA1,FAM13B,YTHDF3,FAR1,USP24,DCAF5,CYB5R3,MAPK8,A…	5.EryP	Trisomy21vsGATA1s	3741
BLALOCK_ALZHEIMERS_DISEASE_UP	7.89049	1e-50	1.24366666666667e-48	1615	TGFB1,ARHGAP6,GYPB,ASAH1,LDLRAD4,S100A4,IL2RG,FLNA,ZFP36L1,RUFY1,MAX,MLC1,LRRFIP2,LMNA,ARMC8,NID1,CD164,IQGAP1,SPTLC2,CD84,RHOBTB3,PTGS1,CCND3,UROD,AKR1C1,PTTG1IP,ATP6V0E1,SNTA1,MACF1,TXNIP,PRMT2,SERPING1,NAA10,TMBIM6,ZBTB16,GPC4,BMP2K,C21orf91,TMBIM1,ARPC1B,SLC25A21,CTSH,FYN,ITGA6,NBAS,PTBP3,CTDSPL,ELF4,CLIC1,LPP,STOM,GPSM3,CLIP2,NCAM1,PTP4A2,RREB1,SEMA3C,CSK,RNPEPL1,RNASET2,DAG1,HMGN3,LRP10,PLC…	6.EryMeg	Trisomy21vsGATA1s	3154
MILI_PSEUDOPODIA_HAPTOTAXIS_DN	7.87617	1e-50	1.24366666666667e-48	674	TGFB1,APLP2,CST3,VCL,FLNA,TLN1,RPS10,SPNS1,CD9,NID1,IQGAP1,ITGB1,SPTLC2,CD151,LY6E,DAD1,PTGS1,LTBP1,SGMS1,PTTG1IP,SLC22A23,TNFSF9,TMBIM6,HSPA5,LRP12,RPN1,ZMYND8,SLC43A3,DCBLD2,CTSZ,SQSTM1,KANTR,RNASEK,GLG1,NCAM1,NEAT1,ESYT1,DAG1,LRP10,SERPINH1,TSPAN14,SEC11A,PDIA3,RTN3,THBS1,VCP,SFT2D1,FAM171A1,TGOLN2,OBSL1,ECE1,SCAMP2,CMTM6,HLA-B,MFSD11,MPDU1,ORAI1,M6PR,GRN,SLC10A3,FBXO34,MAFG,SPPL2A,CDIP1,PDIA5…	6.EryMeg	Trisomy21vsGATA1s	3153
REACTOME_RNA_POLYMERASE_II_TRANSCRIPTION	7.83333	1e-50	8.77529411764706e-49	1292	TGFB1,ITGA2B,MAX,NR4A2,SLC2A3,TP53INP1,GATA1,U2AF1,AUTS2,PRKCB,YES1,SMAD3,ELF1,MT-CO1,ELL2,STAT1,KMT2C,YWHAZ,TFDP2,TXNIP,CCND3,TP53BP2,PTEN,CTNNB1,HDAC5,ITCH,ZNF273,GLS,BNIP3L,UBC,SESN1,SPI1,MEF2C,AFF4,FOS,ELF2,FKBP5,POLR2A,NFKB1,TXNRD1,SERPINE1,SMURF1,NRBP1,NCOR1,FURIN,EP300,CREB1,YWHAG,ZNF385A,CTDP1,PRKCQ,KRAS,ARID2,RICTOR,CPSF6,ING5,ZNF778,GATAD2A,LAMTOR1,CNOT2,ZNF267,PTPN1,ZNF440,TBL1XR1,CITE…	5.EryP	Trisomy21vsGATA1s	3740
KRIGE_RESPONSE_TO_TOSEDOSTAT_6HR_UP	7.83287	1e-50	1.69568181818182e-48	890	SLC2A3,ARMC8,ABCC4,CD55,CDC42BPA,RHOBTB3,TYROBP,PTH2R,PLP2,TXNIP,CPEB4,RPS6KC1,TES,LPP,NEAT1,ITM2A,PTBP3,SCAF4,BMP2K,PTPRC,SP100,IFRD1,HCST,LGALS1,MAML3,SPRY1,KLHL2,PREX1,JAK1,NUMB,ABHD2,CPEB2,DBN1,RSRP1,TANK,SYNJ1,SPPL2A,ATAD2B,LYZ,LNPEP,UGGT1,GPCPD1,STIM1,IGFBP7,NCOA3,PNPLA8,TBC1D4,F11R,FYN,SLC39A3,YPEL5,NFAT5,FCER1G,SLC12A6,WSB1,AGPS,ITPR2,CR1,NFIL3,BAZ2B,ZNF641,DCAF5,TSC22D3,STAT2,SLC25A24,PR…	7.EMPP	NormalvsGATA1s	3138
MARTENS_TRETINOIN_RESPONSE_DN	7.83284	1e-50	9.81842105263158e-49	762	RPS4X,FTH1,RPL7A,CIRBP,RPLP0,RPS3,APRT,HMGN1,ZFP36L2,IMPDH2,VIM,RPL10,RPL19,ACTG1,EEF1A1,RPS14,RPL18A,EIF1,RACK1,HINT1,IL2RG,RPL29,PGLS,DIPK1B,PABPC1,SRSF7,RPS5,PHB2,LAT2,MAZ,TUFM,SOX4,RPL18,CTSC,GLUL,EIF3G,SYNGR2,FABP5,REST,C1orf43,RPL11,RPSA,UBB,GRK2,PNPLA2,TRIM28,RPS12,CITED2,MRPL57,HSPA8,SUPT4H1,HNRNPA1,RAN,MICAL1,RPL7L1,ERP29,RNH1,ABT1,APEH,RBM15B,MAT2A,RSL1D1,EIF5,RBM3,ZNF22,IRAK3,HNRNPK,FA…	6.EryMeg	NormalvsTrisomy21	3023
SCHLOSSER_SERUM_RESPONSE_DN	7.81102	1e-50	8.77529411764706e-49	684	SPTLC2,CD164,HSPA5,PTPRC,CD55,ACTR2,LYZ,LDLRAD4,BACH1,PJA2,KIFAP3,RABGAP1L,RSRP1,STAT1,TAOK3,YWHAZ,TPP2,SEPTIN6,TAX1BP1,CD9,TP53BP2,DYRK1A,MBNL1,ANKRD28,ZNF273,RNF24,ARIH1,PDCD10,UBC,PPP1R12A,SP100,FCGR2A,ATAD2B,ABI1,PHLPP1,PIM2,LAMP2,NCKAP1L,CLASP2,RAB1A,BZW1,ITSN2,ELMO1,PTP4A2,ZNF217,NT5C2,TRA2A,RSU1,SERTAD2,ETS2,DOCK2,MORC3,NCOA2,EP300,PRKAR1A,SF3B1,MAP1LC3B,MAP2K4,SECISBP2L,TRAM1,SNRK,NPTN,CA…	5.EryP	Trisomy21vsGATA1s	3739
MILI_PSEUDOPODIA_HAPTOTAXIS_UP	7.80073	1e-50	1.24366666666667e-48	514	LIMS1,PDCD10,CAVIN2,ACTR2,EIF4G2,FNBP1L,PPP1R12A,PDK1,RAB11A,PJA2,UBR3,PTP4A2,PSMD6,DCAF6,NET1,KIF2A,CYB5R3,TUT7,HMGN3,YES1,YWHAB,STRN,RABEP1,SEPTIN7,AGTPBP1,SELENOT,SNAP23,C1D,CCND2,FGFR1OP2,ZBTB38,NCOR1,PPP1CB,QKI,WDR26,APC,RBM41,VTI1B,GSPT1,EIF3J,AGFG1,DCAF5,CAPZA1,MKRN1,CDV3,CAPZA2,OGFRL1,NCOA2,LTN1,TAX1BP1,ZDHHC2,RIOK3,SEPTIN6,MPP7,MYEF2,OXR1,SCP2,EFR3A,SH3GLB1,BZW1,FRG1,FYTTD1,PIP4K2A,WWP1,…	6.EryMeg	Trisomy21vsGATA1s	3152
RODRIGUES_THYROID_CARCINOMA_POORLY_DIFFERENTIATED_DN	7.79698	1e-50	8.77529411764706e-49	776	PDLIM5,KLF6,MALAT1,SELENBP1,AKR1C1,NEAT1,CST3,MED13L,EPB41,ELL2,CAPN1,DHRS3,PTGER4,TXNIP,PPP1CB,CSRNP1,TAB2,MBNL1,PTEN,ANKRD28,GNAS,GADD45B,NFKBIA,DDX17,F11R,SESN1,TGFBR2,CTNND1,PRMT2,CYLD,PNRC1,RNASET2,AFF4,ELF2,FGD4,FKBP5,TMBIM1,PIAS1,CUL3,SUSD6,SRRM2,MKRN1,TPST2,NET1,GPATCH2L,NCOR1,CHD2,FTX,PCMTD1,ZBTB20,GPBP1L1,SECISBP2L,ARID2,SNRK,LRRFIP1,ADD1,ZBTB46,RILPL2,ZMYM2,MTMR10,SYNE2,ATF7IP,MLXIP,HI…	5.EryP	Trisomy21vsGATA1s	3738
DOUGLAS_BMI1_TARGETS_DN	7.79261	1e-50	8.77529411764706e-49	307	IL1RAP,MLC1,AGPAT3,SQSTM1,STAT1,TPM3,CLIC2,PHKB,OSBPL8,LPP,SP100,CPEB4,IRF9,MYEF2,PIK3CB,RAPGEF2,TMBIM1,ATP6V1A,VEZT,PCMTD1,RAB8B,SNRK,MAPK6,TPP1,DCP2,SDE2,COG5,FAM234A,CD2AP,NFKB2,ICAM1,SUN2,BIRC2,MTMR14,MICU1,DIDO1,TDG,TNFAIP3,VPS36,CSNK1D,KLHL24,STAT6,SLC33A1,MFSD1,FAM199X,PCYT1A,ATP6V0D1,APAF1,NEU1,ARL5B,TMED8,CASP8,TACC1,NGLY1,KPNA6,FZD6,ARL6IP1,SLC9A8,SLC10A7,STK38L,LIPH,RNF168,KATNAL1,MVP,…	5.EryP	Trisomy21vsGATA1s	3737
ONKEN_UVEAL_MELANOMA_UP	7.78505	1e-50	1.69568181818182e-48	778	HERC2,LDLRAD4,PDLIM1,MEIS2,MTSS1,SLC2A3,CHD7,STAM,RABGAP1L,NR4A2,CD55,PPP1R12A,CDC42BPA,TRAPPC10,TYROBP,S100A11,MACF1,ZMYND8,LYN,MSN,TPST2,LAMA5,ACTR3,HACD1,RAB2A,STAT1,GNPTAB,IQGAP1,PTPRC,LGALS1,PTPRA,TMEM87A,PTGS1,NCOR1,NUMB,SMAD3,ITGA6,ELOVL6,SRSF7,RIN3,PSAP,PDE4DIP,BTAF1,VPS13B,IGFBP7,COL18A1,TMEM164,CTSC,ACIN1,RHOB,YWHAZ,ETS2,NCOA2,FCER1G,EFR3A,CTSH,ADGRE5,MAP4K3,WWP1,WSB1,MTR,MCM3AP,ITPR2,T…	7.EMPP	NormalvsGATA1s	3137
GEORGES_TARGETS_OF_MIR192_AND_MIR215	7.78015	1e-50	1.1134328358209e-48	865	HERC2,MEIS2,MTSS1,LRRFIP2,STAM,IL1RAP,PPP1R12A,CHD7,MACF1,BMP2K,LIMS1,ITGB1,RHOBTB3,DNAJC3,ELL2,RSRC1,DYRK1A,IQGAP1,RAB2A,TOP1,NCOA3,OSBPL8,ACTR2,GPC4,DCBLD2,OSBPL6,CDC14A,XK,C21orf91,ATG10,APC,WWC2,IL7,BMPR2,DENND1A,ZMAT3,USP34,USP14,CD164,ZNF273,MSN,AMMECR1,FAM20B,FNDC3B,IGF1R,SGPP1,ZDHHC2,UVRAG,PPP1CB,ZC3H12C,STK3,EIF2AK3,SEMA4D,CDKN2A,TMEM164,SS18,TDG,CEMIP2,IFRD1,HOOK3,POU2F1,NLK,KIF20B,EHBP…	7.EMPP	Trisomy21vsGATA1s	3281
MILI_PSEUDOPODIA_HAPTOTAXIS_DN	7.76931	1e-50	1.1134328358209e-48	674	VCL,APLP2,SGMS1,FLNA,TGFB1,LRP12,SPTLC2,ZMYND8,ITGB1,NEAT1,SLC22A23,TLN1,HSPA5,IQGAP1,GLG1,LTBP1,FAM171A1,PDIA3,ARHGEF7,NID1,KANTR,CST3,FBXO34,WDR26,DCBLD2,ATP11A,SLC7A5,SPNS1,SCFD1,SPPL2A,PTGS1,RPN1,NPTN,TNFSF9,B4GALT1,ANKRD11,TM9SF3,CD151,IGF1R,SGPP1,TSPAN14,CREB3L2,CD9,TMEM245,SPPL3,TXNDC11,ATP6V0A1,PSEN1,EIF2AK3,DAG1,RTN4,NCAM1,SLC43A3,PAN3,ATP2A2,HS2ST1,MED15,RPS10,TGOLN2,MPZL1,ESYT1,ANO10,H…	7.EMPP	Trisomy21vsGATA1s	3280
DOUGLAS_BMI1_TARGETS_DN	7.75208	1e-50	1.24366666666667e-48	307	MLC1,IL1RAP,TPM3,TMBIM1,PHKB,LIPH,FAM234A,PIK3CB,AGPAT3,STAT1,SQSTM1,LPP,ATP6V1A,CPEB4,ATP6V0D1,ABHD4,CLIC2,SP100,IRF9,MOCS2,ZDHHC12,DCP2,M6PR,TAF10,STAT6,MFSD1,SHKBP1,SLC33A1,MICU1,NGLY1,APAF1,MYEF2,MVP,HMOX2,TMEM175,GOLT1B,PPCS,TPP1,YIPF4,BIRC2,TACC1,FAM199X,RASA1,TAFA2,MED16,SNRK,VPS36,VEZT,SOAT1,OSBPL8,IFI35,DIDO1,SUN2,RMND5B,STYXL1,PIGS,TDG,MR1,PCYT1A,RO60,SLC10A7,MTMR14,NHLRC2,CCNDBP1,RWDD2…	6.EryMeg	Trisomy21vsGATA1s	3151
IBRAHIM_NRF1_UP	7.71996	1e-50	8.77529411764706e-49	409	MIR4435-2HG,HSPA5,STAM,LRRFIP2,PSAP,GSTP1,CYTOR,PDIA3,DNAJB11,JAK1,TPM3,TAOK3,SLC7A5,TP53BP2,WDR26,SPAG9,TFG,ALDOA,EIF4G2,MCL1,RAB1A,PRNP,ITSN2,TMBIM6,ELMO1,TPST2,TALDO1,YWHAG,SYAP1,PPP6R3,VEZT,MARK3,SNRK,MAP4,SCFD1,GATAD2A,MAPK6,MACO1,PTPN1,RYR3,AREL1,FXR1,USP14,RTN4,UBQLN1,MAP2K1,SENP2,CSDE1,MAP4K4,SDCBP,KIDINS220,DDHD1,CLIP1,SH3BGRL2,HYOU1,AHCYL2,RAB14,KIF5B,PAFAH1B1,FYTTD1,FBXW11,TM9SF3,CDC37…	5.EryP	Trisomy21vsGATA1s	3736
RODRIGUES_THYROID_CARCINOMA_POORLY_DIFFERENTIATED_UP	7.71155	1e-50	1.1134328358209e-48	625	CYTOR,STAM,IL1RAP,VPS50,MBNL1,ITGB1,RHOBTB3,RSRC1,YWHAZ,HACD1,IGF2BP3,EIF4G2,USP47,GPD2,ACTR2,AGFG1,OSBPL3,ZNF644,ITCH,DCUN1D1,LNPEP,SLMAP,APC,PTPN12,TFDP2,TANK,EVI5,FAF1,UBA6,CTSA,ELOVL6,TNFSF9,JPT1,MAPK1,CCDC88A,YTHDF3,FRYL,AFF4,STAM2,CDKAL1,WDR41,MICU1,SS18,MKLN1,ABCD3,MTREX,SAR1A,KIF20B,DHX9,GSR,EDRF1,TFRC,SNX13,CCDC14,RIF1,KIF5B,MRPS12,ANXA1,SRPK2,HERC4,ATP1B3,RALGPS2,MAN1A2,IDE,SEL1L,SSX2IP…	7.EMPP	Trisomy21vsGATA1s	3279
SENESE_HDAC3_TARGETS_UP	7.70915	1e-50	1.1134328358209e-48	475	KYNU,ABCC4,SLC2A3,PAPPA,IL1RAP,CD55,BACH1,NR4A2,TNIK,MBNL1,MALAT1,PTBP3,NEAT1,CD46,YWHAZ,SMG1,IQGAP1,PDGFC,IGF2BP3,GTDC1,TOP1,CPEB4,NFAT5,MAML3,TRAPPC10,JMJD1C,ACTR2,ZNF644,CPEB2,TMOD3,PTPN12,KLF6,DCP2,GLS,ASH1L,STRN,FCHO2,ATP6V1A,PLD1,ZMAT3,USP34,STK4,JAK1,B4GALT1,RNF19A,GNG2,PSME4,TAOK1,TGFBR2,ADAM10,CCDC88A,PLEKHB2,AFF4,TNKS2,ATP2B1,PPP3CA,CDKAL1,ATP11B,RANBP2,SCYL2,G3BP2,AHCTF1,AKR1C1,CHD4,IT…	7.EMPP	Trisomy21vsGATA1s	3278
SCHLOSSER_SERUM_RESPONSE_DN	7.70674	1e-50	1.1134328358209e-48	684	LDLRAD4,RABGAP1L,PPP1R12A,KIFAP3,CD55,MAP3K5,PRKAR2B,BACH1,SPTLC2,PTPRC,MBNL1,PDCD10,RNF24,YWHAZ,DYRK1A,HSPA5,CLASP2,FCGR2A,ATAD2B,STAT1,PJA2,ACTR2,RSRP1,TP53BP2,GLUL,TCF12,ATF2,TPP2,ZEB2,NCOA2,IL7,MAP2K4,MEF2A,MYCBP2,EP300,SP100,PHLPP1,MORC3,EVI5,ABI1,NPTN,PSMD1,CD164,LYZ,ZNF273,SDCBP,TOP2B,HIPK1,RSU1,CAPZA1,ADAM10,TAX1BP1,CD2AP,CD9,EIF4G3,PPP3CA,SECISBP2L,ANKRD28,STK3,CRY1,RTN4,ATP11B,SH3GLB1,S…	7.EMPP	Trisomy21vsGATA1s	3277
CAIRO_HEPATOBLASTOMA_CLASSES_UP	7.70232	1e-50	9.94933333333333e-49	598	RPS3,RPS14,APRT,RACK1,RPL18A,RPLP0,IMPDH2,RPL19,RPL6,ENO1,RPL28,EEF1B2,RPL8,AHCY,RPL18,EIF4A1,ADSL,CPSF1,RPL11,TRIM28,PHB2,LAPTM4B,ERGIC3,PUF60,TPI1,EIF3F,DDOST,CCT7,RUVBL2,NME2,MAZ,ATP5MC2,PSMG1,JPT1,EIF3L,PLTP,RAN,EEF1D,CDK4,RPL5,SNX5,HMGA1,SRSF9,RPS8,STOML2,CLIC1,PSMF1,HSF1,PRMT1,TRAP1,GART,FARSA,SF3A1,LSM2,HSP90AB1,OXA1L,MRPL12,NPM1,APEX1,ILF2,UBE2S,STK25,ODC1,C1QBP,RPL36,NME1,CLNS1A,MRPS18B,…	5.EryP	NormalvsTrisomy21	2879
LASTOWSKA_NEUROBLASTOMA_COPY_NUMBER_DN	7.69414	1e-50	8.77529411764706e-49	784	APLP2,NEAT1,LUZP1,MACF1,RSRP1,EPB41,JAK1,CDC42,UBR4,PTEN,ANKRD28,CTNNB1,COL9A2,CPEB2,BTAF1,PHACTR4,ZMIZ1,SH3BGRL3,CLASP2,UVRAG,PTP4A2,HP1BP3,R3HCC1L,ODF2L,CAPZB,LAPTM5,LCOR,GPBP1L1,XPNPEP1,CNTN4,VTI1A,TNKS2,RAB6A,SHOC2,LAMTOR1,SH3GLB1,RLF,RDX,TBC1D5,ATXN7,FOXJ3,UBE2E1,PRDM2,USP48,GNB1,PPP1CA,RNF4,AGO3,SPEN,CCNL2,CACUL1,PBRM1,ATG16L2,MIER1,AKIRIN1,SETD2,PNRC2,VPS26A,HYOU1,CMTM6,TOP2B,SORBS1,TUT4,C…	5.EryP	Trisomy21vsGATA1s	3735
LOPEZ_MBD_TARGETS	7.69204	1e-50	2.19470588235294e-48	925	AREG,PCBP2,EIF1,EEF2,IFITM2,IFITM1,NR4A1,EIF4A1,RPLP0,HLA-E,SRGN,ILF2,GSTP1,NPDC1,NFKBIA,CCS,CCNI,SPINT2,SON,SF3A1,APRT,BTG1,JUNB,ANXA1,APP,CORO1A,RACK1,PPP2R1A,CDC37,DAZAP2,SEC61B,KDELR1,TSC22D1,RAN,APH1A,HLA-B,HSPA8,RPS14,EEF1D,EIF3K,EIF1AX,APEX1,AHCY,RPL11,PTTG1IP,EIF3I,MALT1,CSF3R,SOD1,FES,CTSC,ENO1,NUCB2,DDX3X,IRAK3,PUF60,ATP6V0C,ADSL,C15orf39,FDX1,ATP6V1G1,WIPF1,LAPTM4A,FKBP8,ATP5MC2,BCL7B,…	7.EMPP	NormalvsTrisomy21	2780
MILI_PSEUDOPODIA_HAPTOTAXIS_DN	7.69025	1e-50	1.69568181818182e-48	674	TGFB1,VCL,FLNA,APLP2,LRP12,SGMS1,ITGB1,SLC22A23,ZMYND8,GLG1,LTBP1,FAM171A1,PDIA3,SLC7A5,TLN1,HSPA5,CST3,NID1,NEAT1,ARHGEF7,FBXO34,CD151,IQGAP1,TSPAN14,KANTR,SPNS1,RPN1,NPTN,PTGS1,TNFSF9,SPTLC2,VCP,PSEN1,SPPL2A,PTTG1IP,CMTM6,CD9,CTSZ,SREBF1,SON,DCBLD2,TMEM245,B4GALT1,CREB3L2,TXNDC11,NCAM1,BSG,CSF1,SLC10A3,MPZL1,ESYT1,WDR26,ATP11A,LMTK2,IGF1R,SLC19A2,SERPINH1,SQSTM1,SLC43A3,DAG1,CTR9,GPR89A,TMBIM6,…	7.EMPP	NormalvsGATA1s	3136
BLALOCK_ALZHEIMERS_DISEASE_UP	7.68793	1e-50	1.1134328358209e-48	1615	LDLRAD4,ARHGAP6,LRRFIP2,ARMC8,FLNA,TGFB1,RUFY1,CD84,GYPB,MACF1,BMP2K,ZBTB16,ASAH1,NBAS,ZFP36L1,SPTLC2,MAX,SEMA3C,AFF1,RREB1,YES1,RHOBTB3,PTBP3,IL2RG,RNF24,ZFAND3,CTNNBL1,IQGAP1,RAB2A,GALNT10,NCOA3,USP47,LMNA,NID1,NUMB,LPP,GPC4,KDM6A,TXNIP,SCAF4,PIP4K2A,ERP44,PACSIN2,SLC7A5,CDC14A,ERBIN,C21orf91,PRMT2,QKI,NIPBL,STIM1,SLC25A21,ZC3HAV1,CTDSPL,CDK13,USP48,TBC1D5,MARK3,TIPARP,MLC1,MAP4,EP300,SP100,TES…	7.EMPP	Trisomy21vsGATA1s	3276
REACTOME_RNA_POLYMERASE_II_TRANSCRIPTION	7.67978	1e-50	1.24366666666667e-48	1292	GATA1,TGFB1,ITGA2B,SLC2A3,MAX,NR4A2,MT-CO1,MEF2C,LAMTOR1,YWHAZ,CCND3,AUTS2,TXNIP,PRKCB,U2AF1,ELF1,CDKN2A,CALM1,SMAD3,GP1BA,SNRPD3,CITED2,KMT2C,PRKCQ,STAT1,ZNF385A,NRBP1,PSMD6,NFE2,TP53BP2,TMEM219,TP53INP1,YES1,ARNT,THBS1,HDAC5,ZNF641,UBC,FOS,MT-CO2,YWHAB,YWHAH,CASP6,POLR2L,BAX,ZNF273,ARID3A,GPS2,CCND2,SERPINE1,FURIN,CR1,NCOR1,TAF10,FKBP5,SESN1,SP7,GSR,RETN,BMP2,ELL2,NEDD4L,PSMA7,BBC3,PRKACA,SMYD2…	6.EryMeg	Trisomy21vsGATA1s	3150
ACEVEDO_LIVER_CANCER_UP	7.67822	1e-50	1.24366666666667e-48	932	RBPMS2,MTSS1,ZFP36L1,B2M,TAGLN2,SPNS1,CD9,SELENBP1,DUSP23,IQGAP1,RNH1,LYZ,KIFAP3,RHOBTB3,DAD1,S100A10,DYNLRB1,HIGD1A,PTTG1IP,ATP6V0E1,ROCK2,CCL5,NAA10,JARID2,CTSH,UBE2Q1,ARPC5,RSRP1,NBAS,PTBP3,PIM2,ARF3,PIR,PRKAR1A,CD46,PSMD6,PDGFC,ARHGAP12,TP53BP2,JPT1,VPS25,ATP6V1A,HLA-C,YPEL5,LRP10,SERPINH1,TSPAN14,SUB1,TALDO1,TOM1L1,PECAM1,GNG5,TRIP12,ACTR3,RSRC1,CPQ,NQO2,AP1S2,PTPN12,AUH,PPP2R5A,IRF9,POLD4,H…	6.EryMeg	Trisomy21vsGATA1s	3149
ZHENG_BOUND_BY_FOXP3	7.67725	1e-50	1.1134328358209e-48	486	LDLRAD4,MIR4435-2HG,RABGAP1L,SGMS1,STK24,JARID2,CHD7,MACF1,MAP3K5,FYB1,PRKAR2B,ELF1,MT-ATP6,NR4A2,PTPRC,MBNL1,ATXN7,PTBP3,SMAD3,MAP4K4,EPB41,ZFAND6,TP53INP1,ACTR3,GTDC1,PRKCQ,NCOA3,GPD2,MRTFA,CDC42SE2,JMJD1C,OSBPL8,HBS1L,PIP4K2A,TCF12,TPP2,C21orf91,NIPBL,ZC3HAV1,KLF6,ITPR2,TBC1D5,ARHGAP15,SP100,EVI5,CNOT2,SNX14,TOP2B,JAK1,TEC,ZDHHC20,GNG2,ANKRD11,STAT5B,CITED2,TGFBR2,USP6NL,HECTD1,CHD2,FYN,ATP2B1…	7.EMPP	Trisomy21vsGATA1s	3275
ONKEN_UVEAL_MELANOMA_UP	7.6702	1e-50	8.77529411764706e-49	778	PDLIM1,MEIS2,HERC2,TYROBP,NR4A2,SLC2A3,PTPRC,CHD7,CD55,STAM,CELF2,MSN,B2M,MTSS1,EMP3,LDLRAD4,PDE4DIP,MACF1,PSAP,LAMA5,COL18A1,IQGAP1,LYN,SMAD3,HLA-B,S100A11,RABGAP1L,TAGLN2,STAT1,RHOB,TRAPPC10,YWHAZ,TPP2,PTGER4,ARPC2,HACD1,GNAS,RAB2A,PTGS1,JMJD1C,ATP2B1,CTSH,NUMB,PPP1R12A,CALR,IRF9,BTAF1,MAP4K3,VMP1,ELOVL6,SH3BGRL3,FCER1G,BAZ2B,RBM25,KIAA0232,NFIL3,AGAP1,TRA2A,TPST2,ETS2,NCOR1,NCOA2,AUH,LAPTM5,AR…	5.EryP	Trisomy21vsGATA1s	3734
MOOTHA_MITOCHONDRIA	7.66235	2.39259740329445e-50	2.28891818248502e-48	442	ATP5PO,TUFM,ATP5F1B,MRPS2,CYB5R3,SLC25A5,ATP5PF,NME2,ATP5MC2,MDH2,RAN,MRPL57,SHMT2,TXN2,MRPL3,MPST,ATP5F1D,NME4,CNOT7,FARSA,TOMM40,FPGS,GPX4,UQCRC1,OXA1L,MRPL12,BCKDHA,IMP3,MRPL4,TOMM22,C1QBP,MRPS18B,MRPS7,ACAA1,COX5A,SDHC,CYBA,NDUFB2,NDUFB8,NDUFS2,TST,MRPS12,MRPL34,CYC1,HADHA,TIMM13,HAX1,MRPS34,MTHFD2,SDHD,LYPLA2,NDUFS3,PCCB,HTRA2,UCP2,ACADS,TBCB,MRPL28,NDUFA8,DECR1,FIBP,TSPO,CAT,TIMM10,ETFA,PMP…	5.EryP	NormalvsTrisomy21	2878
REACTOME_RNA_POLYMERASE_II_TRANSCRIPTION	7.66178	1e-50	1.1134328358209e-48	1292	ITGA2B,GATA1,AUTS2,SLC2A3,TGFB1,KMT2C,MEF2C,ELF1,MAX,NR4A2,PRKCB,U2AF1,YES1,MT-CO1,SMAD3,ELL2,YWHAZ,CTNNB1,TP53INP1,PRKCQ,NCOR1,MAML3,STAT1,TXNIP,TP53BP2,PIP4K2A,ITCH,TCF12,ATF2,TFDP2,CDK13,USP9X,GLS,RUNX1,EP300,PTEN,CNOT2,SMURF1,ARID2,PSMD1,POLR2A,ZNF273,PTPN1,RNGTT,RICTOR,HIPK1,UBE2E1,MT-CO2,CDC73,PSME4,MAPK1,CTDP1,CITED2,TXNRD1,WWP1,AFF4,TNRC6A,ARNT,SESN1,MED13,ZNF440,TRIM33,GATAD2A,KRAS,CDKN2…	7.EMPP	Trisomy21vsGATA1s	3274
REACTOME_MEMBRANE_TRAFFICKING	7.64959	1e-50	1.69568181818182e-48	620	DNM3,ANK1,STON2,STAM,KIFAP3,CD55,RHOBTB3,TRAPPC10,TUBA1C,FNBP1L,AP3B1,RAB10,CD4,ACTR3,NBAS,RABGEF1,PACSIN2,CLTC,TFG,SPTA1,DNM2,ACTR2,AGPAT3,RIN3,MYH9,VTI1A,SYNJ1,GJA4,PPP6R1,LNPEP,AGFG1,HPS1,CTSZ,CTSC,EXOC4,KIF5B,STAM2,TUBB1,FCHO2,TUBB4B,TBC1D4,RALA,AP2B1,YWHAZ,ANKRD27,NAPG,YWHAB,TRAPPC1,NAPA,PIP5K1C,AP1G1,NSF,EXOC2,COG5,RAB35,DENND6B,ITSN1,ARF3,MAN2A1,TFRC,AP1G2,SCFD1,RABEP1,GOLGB1,GBF1,CAPZA1,V…	7.EMPP	NormalvsGATA1s	3135
ONKEN_UVEAL_MELANOMA_UP	7.64294	1e-50	1.24366666666667e-48	778	PDLIM1,HERC2,SLC2A3,LDLRAD4,MEIS2,MTSS1,TYROBP,EMP3,S100A11,NR4A2,B2M,TAGLN2,S100A6,PFN1,ACTB,FCER1G,HACD1,IQGAP1,YWHAZ,RABGAP1L,LY6E,CHD7,PTGS1,TPST2,MSN,CD55,STAM,MACF1,SH3BGRL3,GNAS,LAMA5,SULT1A3,PTPRC,PSAP,CALM1,ZMYND8,PPP1R12A,CTSH,SMAD3,CDC42BPA,ITGA6,ARPC2,STAT1,STOM,RHOB,LYN,EBAG9,ELOVL6,TRAPPC10,NFIL3,LGALS1,NRDC,ACTR3,ANXA11,PGAM1,ARHGAP1,PTPRA,AUH,IRF9,HLA-B,GNPTAB,SLC39A4,TPP2,CCND2,R…	6.EryMeg	Trisomy21vsGATA1s	3148
RODRIGUES_THYROID_CARCINOMA_POORLY_DIFFERENTIATED_DN	7.63117	1e-50	1.1134328358209e-48	776	PDLIM5,DHRS3,MAP3K5,MED13L,MBNL1,MALAT1,SLC40A1,ELL2,NEAT1,EPB41,FTX,TPST2,GALNT10,NCOR1,CST3,FBXO34,NET1,DDX17,TXNIP,GLUL,PRMT2,ZEB2,STIM1,KLF6,AHCYL2,CDK13,PTEN,HERC1,KANSL1,USP34,ARID2,CTNND1,ATF7IP,NSD1,ITPR1,FBXL17,CITED2,TGFBR2,RNF38,HECTD1,CHD2,SUSD6,SRRM2,ZDHHC2,AFF4,CPQ,SESN1,PPP1CB,GPATCH2L,CUL3,SECISBP2L,ANKRD28,PIAS1,CROT,MTMR10,MON2,WDR11,TNRC6B,TMEM164,SELENBP1,HOOK3,RNASET2,GPBP1L1…	7.EMPP	Trisomy21vsGATA1s	3273
REACTOME_POST_TRANSLATIONAL_PROTEIN_MODIFICATION	7.62752	1e-50	1.1134328358209e-48	1370	HERC2,PRKN,ANK1,APLP2,STAM,TGFB1,ZBTB16,CD55,NR4A2,RAB10,USP15,ATXN7,TIMP1,SMAD3,DNAJC3,DCAF6,ADAMTS3,NCOA1,AGTPBP1,RAB2A,TOP1,LTBP1,TPST2,SPTA1,GALNT10,FUT8,USP47,ANKRD9,TRAPPC10,PDIA3,NPL,CST3,MRTFA,PROS1,DDX17,MAN2A1,DCUN1D1,TUBA1C,NGLY1,FBXW7,APC,TFG,NCOA2,MBD5,USP9X,USP48,SCFD1,USP8,EP300,SP100,PTEN,HSP90B1,COP1,COG5,RPN1,UBA6,USP34,CTSA,USP14,PSMD1,TRAPPC9,UGGT1,TOP2B,SENP5,RIPK1,STAG1,UBE2…	7.EMPP	Trisomy21vsGATA1s	3272
REACTOME_METABOLISM_OF_RNA	7.627	1e-50	9.94933333333333e-49	714	RPS4X,RPS26,PCBP2,RPL7A,RPL12,RPS3,RPS14,RPL18A,RPL10,RPLP0,RPL19,RPL6,HSPA8,RPL28,RPL29,RPL8,RPS5,RPS2,RPL18,EIF4A1,RPS12,CPSF1,RBM8A,RPL11,RPS15,PABPC1,TSEN54,RPL22L1,PUF60,RPL41,RPS28,RPS7,RPL3,RPL13,RPSA,RRP1,PPP2R1A,LSM7,RAN,RPL32,DDX39B,PCBP1,THOC3,RPL30,RPL5,RPLP1,WDR18,NOB1,SRSF9,RPS8,PSMF1,CNOT7,SF3A1,LSM2,IMP3,PES1,RPL36AL,RPL35A,SF3A2,RPL36,YWHAB,EXOSC5,CLNS1A,SRSF7,PSMD8,HNRNPF,SNRPD2…	5.EryP	NormalvsTrisomy21	2877
MILI_PSEUDOPODIA_HAPTOTAXIS_DN	7.60558	1e-50	1.165e-48	674	TGFB1,FLNA,PTTG1IP,TLN1,APLP2,HLA-B,BSG,ZFP36,TNFSF9,CST3,HSPA5,SLC7A5,VCL,NEAT1,SPNS1,HSPG2,PDIA3,HLA-A,FAM171A1,SQSTM1,IQGAP1,CD151,VCP,NID1,SON,DUSP1,CD9,OBSL1,RPN1,PIM3,CTSZ,PTGS1,ESYT1,LRP12,CTSD,GRN,MYADM,TSPAN14,RPS10,GLG1,SPTLC2,ORAI1,LY6E,SLC10A3,SLC22A23,TMED9,SGMS1,LRP10,MFSD10,FBXO34,ZMYND8,CSF1,ATP6AP1,RNASEK,SCAMP2,ARHGEF7,SREBF1,DDOST,MFSD1,SERPINH1,KANTR,ATP6V0B,TXNDC11,TMBIM6,CMT…	5.EryP	NormalvsGATA1s	3645
PUJANA_ATM_PCC_NETWORK	7.60276	1e-50	1.1134328358209e-48	1325	KYNU,ITGA2B,ZNF804A,GNAQ,CD36,TGFB1,JARID2,LYN,ELF1,SPTLC2,MAX,PTPRC,MBNL1,U2AF1,RREB1,GYPE,PDCD10,RCOR1,IL2RG,AP3B1,EPB41,RANBP9,BTAF1,ACTR3,FCGR2A,TOP1,GPD2,STAT1,CBFA2T3,ACTR2,PDK1,OSBPL3,RSRP1,ATP11A,ATF2,CDC14A,SMCHD1,TPP2,APC,PRMT2,ZC3HAV1,TFDP2,IL7,DCP2,CDK13,STRN,RUNX1,TBC1D5,SCFD1,EP300,SP100,TANK,PTEN,CENPC,ABI1,NBEAL2,JAK2,USP34,ZNF273,STK4,TOP2B,PTPN1,SENP5,RNGTT,TMEM131L,TEC,AMMECR1,…	7.EMPP	Trisomy21vsGATA1s	3271
LASTOWSKA_NEUROBLASTOMA_COPY_NUMBER_DN	7.58574	1e-50	1.69568181818182e-48	784	APLP2,LUZP1,MACF1,CTNNB1,ATXN7,PDZD8,NEAT1,EPB41,CTDSPL,UBR4,PHACTR4,JAK1,CPEB2,RSRP1,COL9A2,VTI1A,CMTM6,BTAF1,PRDM2,CLASP2,PBRM1,UBE2E1,XPNPEP1,EDRF1,HP1BP3,FRYL,PTS,WDR11,CNTN4,NGLY1,THRAP3,ZC3H12C,ATE1,CCNL2,USP33,USP48,ACAD8,TNKS2,TBC1D5,MTMR14,RBM6,ZNF518A,SIRT1,ODF2L,MFN2,BIRC2,EFCAB14,CAP1,CEP85,LCOR,ZMIZ1,R3HCC1L,FAF1,DNAJB12,ARMH3,GBF1,SMIM12,MICU1,GPBP1L1,OXSR1,PRKAR2A,CAPZB,RCAN3,SMARC…	7.EMPP	NormalvsGATA1s	3134
REACTOME_VESICLE_MEDIATED_TRANSPORT	7.583	1e-50	1.24366666666667e-48	707	DNM3,ANK1,TUBA1C,CD36,STON2,CD4,ACTB,YWHAZ,KIFAP3,RHOBTB3,GJA4,ACTR2,CD55,STAM,ARPC3,HPS1,TRAPPC1,RAB10,SPTA1,CALM1,CAPZB,FNBP1L,TUBB1,DENND6B,CLTC,CTSZ,ARPC5,AGPAT3,NBAS,ARPC2,ARF3,RAB11A,ARPC4,MYH9,KIF2A,NAA38,PPP6R1,VPS25,PIP5K1C,RAB8A,TRAPPC10,UBC,VTI1A,ACTR3,SPTB,RAB5C,RABGEF1,YWHAB,AP2M1,TUBB2A,TGOLN2,YWHAH,RABEP1,MAP1LC3B,RAC1,AP1S2,RAB14,NAPA,FCHO2,CHMP4B,SNAP23,COPE,LNPEP,M6PR,VPS37A,ANK…	6.EryMeg	Trisomy21vsGATA1s	3147
MULLIGHAN_MLL_SIGNATURE_2_UP	7.58089	1e-50	1.24366666666667e-48	412	KYNU,APOC2,S100A4,FLNA,OAZ1,S100A6,IQGAP1,CYBA,CTSA,CCND3,ACTR2,ATP6V0E1,SLC16A3,ABHD17A,RNF167,EHBP1L1,SERF2,ARPC2,ELF4,PRKCD,GLG1,ARPC4,ABHD2,RNPEPL1,LRP10,PECAM1,C15orf39,TRAPPC10,LGALS1,NINJ2,C11orf21,FES,LAT2,TGOLN2,MYO1F,SCPEP1,ARHGAP1,KIAA0930,AP1S2,CLASP2,APOBR,SYK,POLD4,LNPEP,GPS2,M6PR,GRN,BCAP29,BLOC1S1,UGGT1,COQ2,APBB1IP,PTMS,MICAL1,MFSD1,LAPTM5,TADA3,LAMP1,RAB6A,GRB2,FAM53B,SFMBT1,POL…	6.EryMeg	Trisomy21vsGATA1s	3146
ENK_UV_RESPONSE_KERATINOCYTE_UP	7.57816	1e-50	9.94933333333333e-49	510	RPL12,RPS3,APRT,RACK1,RPL18A,RPL10,RPL19,ENO1,RPL28,RPL29,RPL8,GSTP1,RPS5,TSC22D1,RPL18,EIF4A1,ETS2,AREG,TUFM,RPS15,TRIM28,PHB2,ERGIC3,EIF3F,EIF3G,EIF3K,COMT,LY6E,ECH1,TAGLN2,RNH1,NME2,S100A11,CDC37,PPP2R1A,IL1B,OAZ1,EIF1,IER2,PCBP1,TGFB1,TXN2,ATP5F1D,HMGA1,TUBB4B,JUNB,NME4,TALDO1,STOML2,SF3A1,GPX4,UQCRC1,HSP90AB1,CITED2,FOS,VAT1,ZNF593,CTSD,ODC1,EIF3I,ACAA1,RAB9A,PSMD8,BTF3,ATP5F1A,CSNK2B,EIF6,P…	5.EryP	NormalvsTrisomy21	2876
BLALOCK_ALZHEIMERS_DISEASE_UP	7.57124	1e-50	1.69568181818182e-48	1615	LDLRAD4,ARHGAP6,TGFB1,ARMC8,IL2RG,FLNA,RUFY1,ASAH1,GYPB,ZFP36L1,MAX,ZBTB16,CD84,LRRFIP2,RHOBTB3,PRMT2,MACF1,ANXA1,YES1,PIM1,TXNIP,SEMA3C,RREB1,SLC7A5,MLC1,TES,NBAS,RAB2A,LPP,NID1,GPC4,PACSIN2,PTBP3,SCAF4,C21orf91,CD164,IQGAP1,BMP2K,RNF24,CLIP2,SP100,GALNT10,LMNA,IFRD1,TRIM24,ATP6V0E1,SLC25A21,ANGPT1,CNOT2,CTDSPL,PTGS1,SPTLC2,NUMB,ITGA6,CTNNBL1,GCLC,ELOVL6,CPQ,RIN3,PTTG1IP,CMTM6,MYCN,CCND3,STIM1,C…	7.EMPP	NormalvsGATA1s	3133
JOHNSTONE_PARVB_TARGETS_3_DN	7.56125	1e-50	1.24366666666667e-48	847	ACTN1,PRKAR2B,RABGAP1L,SGMS1,CCND3,HIGD1A,TPM1,PDK3,CDC42BPA,CDC42SE1,PIK3CB,FOXN2,PTBP3,DNAJB6,TMEM50A,DNAJC3,KIF2A,ORC4,MID1,SUB1,EBAG9,YES1,NINJ2,RSRC1,TUBB2A,C1orf174,MAP1LC3B,AP1S2,G3BP2,TIPARP,LNPK,ZNF273,ATP2C1,PPP1CB,FKBP5,QKI,ATP9B,AP1G1,ELL2,ENY2,PCMT1,BMPR2,SLC7A5,MLF1,BLZF1,MORC3,TAX1BP1,LAMP2,TMED7,RECQL,STAM2,OXR1,CTNNB1,ADI1,PLEKHB2,CCDC14,UBA6,ANP32E,SAR1A,GOLT1B,MAN2A1,LSM10,FBXW…	6.EryMeg	Trisomy21vsGATA1s	3145
GARY_CD5_TARGETS_UP	7.56047	1e-50	8.77529411764706e-49	455	TGFB1,MALAT1,SLC2A3,IL2RG,TLN1,CD55,NEAT1,ZFP36L1,TNFSF9,LRBA,ZFAND3,SQSTM1,NFAT5,PJA2,CD83,SESTD1,STAT1,SEPTIN6,NCOA3,PPP1R18,GNAI2,CDC42,PTPN6,RELB,MIDN,ANKRD11,WASF2,NFKBIA,DDX17,BNIP3L,CALR,IRF9,SPI1,VMP1,RBM39,PIM2,BRAF,CAB39,STAT5B,IRF2BP2,FNIP1,CD70,KDM6B,MKRN1,RSRC1,AUH,CTNNA1,MAP1LC3B,PDK1,AKAP13,SECISBP2L,TPP1,ZMYM2,PFKL,MYADM,MEF2A,USP47,HMG20B,MAP2K3,GSK3B,GNB1,LENG8,STK4,SDCBP,NBEAL2…	5.EryP	Trisomy21vsGATA1s	3733
GABRIELY_MIR21_TARGETS	7.55878	1e-50	8.77529411764706e-49	284	RHOBTB3,ACTR2,NFAT5,PTBP3,WWC2,GNAQ,ANKRD28,ARHGAP21,SESN1,ATAD2B,TGFBR2,ACAP2,MYEF2,ITSN2,CUL3,PAN3,ZNF326,UBR3,LMBR1,ZBTB20,MAP3K2,EIF2AK3,CEMIP2,APC,ZMYM2,ZNF292,DLG1,SYNE2,MYCBP2,BMPR2,TBL1XR1,NIPBL,USP47,RFX7,TNRC6B,PIK3R1,GPD2,OSBPL3,PLD1,HECTD1,ATF2,PIK3C2A,ESYT2,PBRM1,FBXL17,DDX3X,USP34,FBXO11,RALGPS2,ZBTB38,RNF38,TRPM7,LCORL,FAM3C,RAB3GAP2,USP7,PHIP,VPS36,KLHL24,MEGF9,MAP3K1,SUZ12,DYNC1L…	5.EryP	Trisomy21vsGATA1s	3732
MILI_PSEUDOPODIA_CHEMOTAXIS_DN	7.5552	1e-50	1.165e-48	453	TLN1,FOSB,APLP2,TXNIP,PFKL,ZFP36,TNFSF9,HSPA5,PSAP,VCL,FOS,NEAT1,SPNS1,PDIA3,HLA-A,FAM171A1,SQSTM1,KLF6,MAN2B1,VCP,SON,DUSP1,CD9,OBSL1,CLIC1,RPN1,MALAT1,PIM3,PTGS1,ZMIZ1,ESYT1,SERPINE1,LRP12,KDM6B,ADD1,GRN,RPS10,GLG1,PRNP,SUN2,LY6E,SLC10A3,SGMS1,MFSD10,ZMYND8,SERPINF1,SCAMP2,HSPA8,DDOST,SLC19A2,PDIA6,PTPRA,CDIP1,CTNNB1,SEL1L,BCAP31,SPPL2A,SNX29,CNNM2,GPR108,THRAP3,PABPN1,SNX14,BIRC2,CCNY,RPN2,TME…	5.EryP	NormalvsGATA1s	3644
DANG_BOUND_BY_MYC	7.54439	1e-50	1.24366666666667e-48	1010	TGFB1,ASAH1,MEIS2,ZFP36L1,OAZ1,TAGLN2,PFN1,PAPPA,ABCC4,LMNA,CD63,NID1,CD164,SNX3,ITGB1,SPTLC2,CYBA,MAP3K5,PDCD10,XK,MSN,UROD,ILK,PTPN6,FLOT2,U2AF1,ATP5F1E,JARID2,PSAP,PPP1R12A,PDK3,SMAD3,UBAC1,GSTP1,SNRPD3,VASP,ITGA6,PMVK,SQSTM1,CMAS,GPSM3,RAB11A,ARPC4,VPS29,FXN,DDX17,RNASET2,RPS27L,RAB8A,MKNK1,VCP,NFIL3,HERPUD1,SDF2L1,ACTR3,RABGEF1,AMMECR1,YWHAH,RNFT1,SYK,IRF9,BAX,POLD4,ACAD8,MOCS2,RBM4,TPP2,LNP…	6.EryMeg	Trisomy21vsGATA1s	3144
FLECHNER_BIOPSY_KIDNEY_TRANSPLANT_OK_VS_DONOR_UP	7.5369	1e-50	8.77529411764706e-49	556	PDLIM5,ITM2A,APLP2,RHOBTB3,SELENBP1,HSPA5,AKR1C1,PTPRC,ACTN1,AUTS2,ACTR2,MSN,LYZ,TFPI,HLA-A,PDIA3,PJA2,RSRP1,STAT1,SEPTIN6,CD9,HERPUD1,NCOA3,SMG1,PHKB,CFH,DYRK1A,CD46,MYH9,RAB2A,GLS,BMP2K,GABBR1,TGFBR2,ABI1,LAMP2,QKI,MCL1,CLASP2,RAB1A,BZW1,CRYM,FNBP1L,PTP4A2,ATP6V1A,TRA2A,MORC3,NCOA2,AUH,CREB1,CTNNA1,PRKAR1A,ZBTB20,PTPN12,E2F3,NPTN,LRRFIP1,SHOC2,CAPZA1,SCFD1,ZMYM2,COPA,SIAH1,CREB3L2,TANK,USP14,CI…	5.EryP	Trisomy21vsGATA1s	3731
MARTORIATI_MDM4_TARGETS_FETAL_LIVER_DN	7.53063	1e-50	1.1134328358209e-48	512	RHAG,VCL,PRKAR2B,RAB10,ROCK2,SMAD3,FADS2,ELL2,EPHA3,PJA2,WDR26,ACTR2,LPP,DDX17,AP1G1,ERBIN,QKI,USP48,MEF2A,NUDT4,PTEN,COP1,FAF1,ANGPT1,ATF7IP,RBM25,GNG2,MT-ND3,ADAM10,RNF38,YTHDF3,SLC44A1,ARNT,ATP2B1,NUFIP2,ZNF148,CUL3,ANKRD28,STK3,NFATC3,SCYL2,HP1BP3,CCNT2,SH3GLB1,TENT5C,NORAD,GALNT1,PPM1B,MACO1,UBAP2,DHX9,TFRC,TGOLN2,TNPO3,CERT1,MMP14,GLYR1,PSAP,PRKAR2A,AKAP10,PCYT1A,ARHGAP5,SMARCA5,ILRUN,PELI1…	7.EMPP	Trisomy21vsGATA1s	3270
KRIGE_RESPONSE_TO_TOSEDOSTAT_6HR_DN	7.51911	3.62273984712061e-50	7.30618506465243e-48	909	RPS26,ZFP36L2,IFITM2,LAPTM4B,CA2,SRGN,SNHG5,RCSD1,LSP1,IGFBP7,DNAJB1,SOX4,ARHGAP9,PEBP1,RRP1B,PGK1,SYNGR2,FGD3,LGALS12,DNAJB6,ARHGAP25,CAPG,MRPL57,IMP3,FSCN1,CD81,MYC,MAZ,PRMT2,CLEC11A,DUS3L,LGALS9,ZNF593,C4orf3,MYLIP,PNP,NDUFC1,ARHGDIA,CCDC85B,RRP7A,LSM7,MGLL,MDFIC,FKBP1A,PWP1,GADD45B,MGAT4A,RRP1,P2RY8,ACTR5,SNU13,TM7SF3,DDX54,CABLES1,TENT5A,EIF4E2,NDUFS3,DUT,ERGIC1,SLC25A32,VAMP8,JPT1,TXNDC17,C…	7.EMPP	NormalvsTrisomy21	2779
HOUNKPE_HOUSEKEEPING_GENES	7.51345	1e-50	1.165e-48	1108	DNAJB6,MAX,ACTR2,PDIA3,LAMTOR1,STK24,VCP,ARPC2,SON,CALR,CDC37,RPN1,JAK1,PACSIN2,ATP6V0E1,ZMIZ1,PPP6R1,ADIPOR2,U2AF1,NAPA,DNAJC3,HSP90B1,EIF2AK1,ADRM1,OS9,NRBP1,PRKAR1A,PBX2,BNIP3L,UBR4,SNX3,HP1BP3,P4HB,RNF167,TMED9,RALA,PPIB,EIF4G2,TAX1BP1,FAM20B,DDX17,DNAJB11,TMBIM6,MAP2K1,PDIA6,RAB1B,TMEM219,CTNNB1,CMPK1,AP2M1,BCAP31,RAB11B,SENP5,CDC42SE1,UBE2Q1,PIP5K1C,MED21,THRAP3,CNPPD1,SF3A2,RALY,HGS,PABPN1…	5.EryP	NormalvsGATA1s	3643
BENPORATH_MYC_MAX_TARGETS	7.51216	1e-50	1.24366666666667e-48	738	ASAH1,TMSB4X,OAZ1,TAGLN2,PFN1,ABCC4,CD164,SNX3,SPTLC2,CYBA,MAP3K5,PDCD10,XK,ILK,PTPN6,FLOT2,U2AF1,ATP5F1E,JARID2,PPP1R12A,PDK3,SMAD3,SNRPD3,VASP,PDK1,PMVK,SQSTM1,STOM,GPSM3,RAB11A,ARPC4,VPS29,DDX17,RNASET2,RPS27L,RAB8A,MKNK1,VCP,SDF2L1,ACTR3,RABGEF1,AMMECR1,YWHAH,RNFT1,SYK,POLD4,ACAD8,MOCS2,RBM4,TPP2,LNPEP,TRIM24,M6PR,PPP1CB,NDUFB2,IER2,RGL2,RRAS,GMIP,NDUFB1,FKBP2,IFNAR1,CORO1C,STX7,KHSRP,ARHGEF7…	6.EryMeg	Trisomy21vsGATA1s	3143
IBRAHIM_NRF2_UP	7.51197	1e-50	1.69568181818182e-48	510	ABCC4,BACH1,LRP12,EIF4G2,STK24,LRRFIP2,YES1,MSN,RAB10,PDIA3,DNAJC3,SLC7A5,RPS6KC1,ACTR3,HSPA5,VEZT,IFRD1,TMEM87A,NUMB,MICU2,SPX,CTNNBL1,GCLC,AGFG1,PPP2CB,NCOA3,DNAJA1,KIF5B,PNPLA8,GBE1,ABCD3,STAU2,YWHAB,WWP1,RANBP9,TXNRD1,WDR26,TMOD3,AKR1C1,GTF2E2,PIR,ITCH,SQSTM1,WASHC2C,HSP90B1,RNF216,GPR89A,TFRC,TMBIM6,NOCT,SCFD1,CEP85,RABEP1,YME1L1,TBK1,SDCBP,RTN4,IKBKG,MAPRE1,GGNBP2,BTBD10,PGGT1B,DNAJB11,MERT…	7.EMPP	NormalvsGATA1s	3132
LOPEZ_MBD_TARGETS	7.49043	1e-50	9.94933333333333e-49	925	EEF2,PCBP2,RPS14,APRT,IFITM2,RACK1,RPLP0,SOD1,HSPA8,ENO1,SRGN,AHCY,GSTP1,ARL6IP4,RPS2,TSC22D1,RPL18,EIF4A1,AREG,ADSL,RPL11,MYC,CCS,ANXA1,MAT2A,PUF60,EIF3K,ECH1,RPS7,EIF1AX,FES,MAZ,FKBP8,ATP5MC2,ARL2,CDC37,PRELID1,PPP2R1A,RAN,EEF1D,EIF1,MFNG,ANXA11,TXN2,SPINT2,NR4A1,CAPN1,JUNB,WDR18,RPS8,APH1A,OTUB1,TRAP1,SF3A1,TOMM40,OXA1L,IFITM1,APEX1,ILF2,CNBP,RPL36AL,RPL35A,UBE2S,HSPG2,PKM,CTSC,EIF3I,KDELR1,RA…	5.EryP	NormalvsTrisomy21	2875
KINSEY_TARGETS_OF_EWSR1_FLII_FUSION_UP	7.48572	1e-50	1.1134328358209e-48	1250	PLXDC2,IL1RAP,DIPK2A,CLEC11A,RNF182,PRKCB,UBR3,RCOR1,PTBP3,CDYL,EPB41,RANBP9,IGF2BP1,USP47,ANKRD9,GPD2,CDC42SE2,ACTR2,NET1,OSBPL3,UBR1,FAR1,DCUN1D1,PLP2,CYB5R4,SLC25A21,DCP2,DNAJB6,CDK13,NUDT4,SPPL2A,PSMD1,AMMECR1,STAG1,TM9SF3,USP6NL,WWP1,ATG5,UVRAG,ASAP1,TMEM245,CUL3,STAU2,CDKAL1,CKAP5,NFATC3,SS18,DIDO1,SLC43A3,IFRD1,ATP2A2,SENP6,KIF20B,MAP2K1,PBRM1,HS2ST1,KIF13B,TACC1,XPNPEP1,CUX1,KPNA1,MIB1,RI…	7.EMPP	Trisomy21vsGATA1s	3269
KOINUMA_TARGETS_OF_SMAD2_OR_SMAD3	7.48339	1e-50	1.1134328358209e-48	813	STON2,PDLIM1,VCL,SGMS1,MBOAT2,KMT2C,ACTN1,DHRS3,CD55,ZFP36L1,BACH1,ZMYND8,MBNL1,MAST4,ITGB1,MALAT1,CLTC,PTBP3,SMAD3,ELL2,SUSD1,TLN1,GSE1,YWHAZ,SMG1,HSPA5,SESTD1,SPECC1,JMJD1C,NET1,ABHD2,OSBPL3,FAR1,ARHGAP21,DENND4A,MICALL2,TMOD3,PLP2,LNPEP,SLC7A5,QKI,KLF6,MBOAT1,PICALM,GLS,MEF2A,RUNX1,FCHO2,MARK3,BMPR2,TIPARP,PLD1,TES,MYH9,CORO1C,SMURF1,ARID2,NPTN,CLIP2,RBM25,S100A10,CMIP,TXNRD1,TAX1BP1,SUSD6,STA…	7.EMPP	Trisomy21vsGATA1s	3268
REACTOME_POST_TRANSLATIONAL_PROTEIN_MODIFICATION	7.47754	1e-50	8.77529411764706e-49	1370	TGFB1,TIMP1,HERC2,PRKN,APLP2,ZBTB16,NR4A2,CD55,STAM,CST3,HLA-A,SMAD3,SQSTM1,PDIA3,HSP90B1,DNAJC3,ANK1,AGTPBP1,TRAPPC10,CTSA,USP20,CFP,ADAMTS3,ANKRD9,TGOLN2,PTEN,ANKRD28,NPL,TUBA1C,RAB2A,UBE2H,NFKBIA,DDX17,HIF1A,RAB10,STAG1,UBC,SP100,TFG,CALR,TGFBR2,B4GALT1,CYLD,MRTFA,ARF3,VCP,RAB1A,CTSZ,PIAS1,CUL3,PTP4A2,SEL1L,CAPZB,TPST2,RPN1,UBA6,TRAF6,FURIN,OBSL1,NCOA2,EP300,SNX3,PPP6R3,USP15,TMED7,SENP5,BTBD1…	5.EryP	Trisomy21vsGATA1s	3730
ZHENG_FOXP3_TARGETS_IN_THYMUS_UP	7.46675	9.34502389483798e-48	9.1728787178278e-46	199	LDLRAD4,RABGAP1L,SGMS1,JARID2,CD84,MAP3K5,ELF1,MBNL1,PTBP3,ZFAND6,TOP1,NCOA3,JMJD1C,HBS1L,PIP4K2A,TCF12,TPP2,C21orf91,ZC3HAV1,KLF6,TBC1D5,ARHGAP15,ATP6V1A,EVI5,CNOT2,SDCBP,TOP2B,STAT5B,CITED2,ATP2B1,SESN1,CDK19,TOX,CBLB,OTULIN,CELF2,WNK1,HEATR5A,ITGA6,CHD9,NSMCE2,PPP2R5C,ZNF217,GPHN,B3GNT2,FAM91A1,SMC5,MYO9A,MAN1A2,BTBD10,ANKRD12,IBTK,TASP1,ARHGAP5,RAB8B,ARL4A,TBC1D15,PELI1,LNX2,MAN1A1,RAPGEF6,ST…	7.EMPP	Trisomy21vsGATA1s	3267
DIAZ_CHRONIC_MYELOGENOUS_LEUKEMIA_UP	7.45908	1e-50	1.165e-48	1381	KYNU,RHAG,PDLIM5,TGFB1,ITGA2B,TIMP1,DLC1,LAT,FLNA,ITM2A,IL1RAP,CD63,GATA1,ZFP36L1,NCF4,MSN,HDC,TAGLN2,BSG,PLP2,PTPN6,DNAJB6,ETS2,SLC7A5,VCL,KIFAP3,ANXA1,ACTR2,CD55,HSPG2,MPP1,CAPNS1,STAT5A,SQSTM1,STK24,EMP3,S100A10,TMBIM1,HACD1,CITED2,ARPC3,CFH,CDC37,CLIC2,FCGR2A,ABCC4,HBG1,STAM,LMNA,ARF3,FLOT2,PTGS1,PIM1,TSC22D1,PACSIN2,ATP6V0E1,FKBP5,EPB41,ELF4,NAPA,ADAM8,YES1,F11R,EIF2AK1,RPS6KC1,KEL,DNM2,CD7,…	5.EryP	NormalvsGATA1s	3642
ENK_UV_RESPONSE_KERATINOCYTE_UP	7.44378	1e-50	9.81842105263158e-49	510	AREG,RPS3,APRT,EIF4A1,ETS2,MYCN,RPL10,RPL19,LGALS1,RPL28,GSTP1,RPL12,RPL18A,COMT,EIF1,RACK1,ENO1,RPL8,RPL29,EIF3K,HLA-B,RPS5,PHB2,TUFM,PSMB8,ERGIC3,CDC37,RPL18,TALDO1,EIF3F,EIF3G,RABAC1,CLTA,S100A11,ECH1,ATP5F1A,RPS15,UBB,BTF3,PPP2R1A,PPIF,VAT1,TRIM28,EIF3I,UQCRC1,CAPG,CITED2,SF3A1,HLA-E,TAGLN2,CCNI,SUPT4H1,NUCB1,CYBA,RNH1,ARHGDIA,CTSD,TSC22D1,EIF5,ACAA1,JUNB,ATP6V0E1,P4HB,STOML2,MAGED2,IL1B,CEBP…	6.EryMeg	NormalvsTrisomy21	3022
IBRAHIM_NRF1_UP	7.43582	1e-50	1.69568181818182e-48	409	MIR4435-2HG,STAM,CYTOR,EIF4G2,LRRFIP2,RYR3,MAP4K4,TPST2,PDIA3,SLC7A5,HSPA5,VEZT,TFG,SYAP1,JAK1,PSAP,TP53BP2,PPP2CB,PTPN1,AREL1,DNAJA1,KIF5B,CDC37,LIPH,MAP4,MAP2K1,AHCYL2,MPZL1,WDR26,TNPO3,PCYT1A,RAB35,BNIP3,SH3BGRL2,USP14,CTR9,SLC25A24,RBM6,TMBIM6,MFN2,SCFD1,RABEP1,YME1L1,KIDINS220,TBK1,SDCBP,PTPN11,RTN4,MAPRE1,GRB2,SOAT1,DNAJB11,SLC7A11,CYREN,PPIF,ZNF746,DDHD1,TAF2,CDK12,CMAS,GATAD2A,TPM3,MACO1,…	7.EMPP	NormalvsGATA1s	3131
KRIGE_RESPONSE_TO_TOSEDOSTAT_24HR_UP	7.43337	1e-50	1.165e-48	734	DBN1,TYROBP,TXNIP,HCST,RHOBTB3,PLP2,SLC2A3,PRMT2,BIN2,NEAT1,CD55,HLA-A,SQSTM1,KLF10,GPSM3,LPP,PTH2R,TSC22D3,RSRP1,TES,FCER1G,JAK1,LGALS1,ITM2B,NFIL3,KDM6B,BMP2K,MYL12A,CPEB4,F11R,G6PD,RPS6KC1,PTBP3,EHBP1L1,AP1G2,SP100,BNIP3L,PRNP,MBD6,LRP10,YPEL5,EIF5,AP1S2,PREX1,PRAM1,ZBTB46,NORAD,SCAF4,RCSD1,SEC14L1,PTPRC,SYTL1,C11orf21,JAG1,ABHD2,CCDC92,AKAP13,MAFF,SPPL2A,CTSS,NCOA3,AGA,VSIR,CARD19,SYNJ1,CPEB2…	5.EryP	NormalvsGATA1s	3641
THEILGAARD_NEUTROPHIL_AT_SKIN_WOUND_DN	7.43166	1.19034023813383e-49	9.86527537360022e-48	226	TGFB1,MEIS2,STK24,ACTN1,CELF2,PRKCB,NCOA4,IQGAP1,JAK1,TAOK3,PHKB,GNAI2,CBFA2T3,GNAQ,OAZ1,GNAS,CD46,HDAC5,NCF4,SEC14L1,PPP1R12A,PRMT2,EIF4G2,ARPC1B,NPEPPS,ARPC3,ZNF217,CAPZB,TPST2,PDE3B,DOCK2,USP15,CDKN2D,PRKAR1A,MAP2K4,FLOT2,LRRFIP1,NCOA1,CITED2,INPP5D,GSK3B,PPP1CA,ADGRE5,OGT,CDK13,RIPK1,MAP3K5,MYO9B,ARHGAP4,KLC1,ADAM10,NUP153,FOXO1,RGS19,CREBBP,STAT6,UBN1,LASP1,MTMR3,APAF1,PLCG2,SRPK2,STX16,SPTL…	5.EryP	Trisomy21vsGATA1s	3729
NUYTTEN_EZH2_TARGETS_UP	7.39707	1e-50	8.77529411764706e-49	999	MEIS2,KLF6,APLP2,MAX,HSPA5,DNAJB6,ZFP36L1,B2M,BACH1,C15orf39,AGPAT3,SGMS1,SQSTM1,HLA-B,JARID2,NFAT5,HSP90B1,ARMC8,CD83,FYB1,ANK1,STAT1,CDC42SE2,WWC2,YWHAZ,HLA-C,TXNIP,PPP1CB,HERPUD1,TAB2,NCOA3,CDC42SE1,TP53BP2,RHOC,CDC42,S100A4,RPS6KC1,GNAQ,WDR26,SLC25A36,PIK3CA,SPAG9,NFKBIA,ARHGAP21,CPEB2,SP100,TFG,TGFBR2,FCHO2,ADIPOR2,CYLD,PNRC1,PIK3CB,FNDC3B,LAMP2,ARF3,QKI,TNIK,MCL1,CAB39,MIR22HG,PRNP,RBM25,PT…	5.EryP	Trisomy21vsGATA1s	3728
MARSON_BOUND_BY_FOXP3_STIMULATED	7.3933	1e-50	1.69568181818182e-48	950	ARMC8,BACH1,APLP2,RABGAP1L,ZFP36L1,FYB1,ROCK2,SLC9A9,MAP4K4,PIM1,TPST2,MAP3K5,PDIA3,CITED2,TES,RAB2A,LCP2,PTBP3,GPD2,PTPRC,PDK1,HCST,CNOT2,ARHGAP12,NPTN,CENPC,ARHGAP10,ABHD2,RSRP1,PSEN1,OSBPL8,NDFIP1,LNPEP,CCND3,ZFAND6,GNG2,APBB1IP,CROT,TMEM164,JAK2,ADD1,CTSC,MBNL1,NCOA3,KIF5B,SUSD6,PECAM1,LIPH,NRBP1,ZC3HAV1,PBRM1,CSF1,FYN,LCORL,HP1BP3,NFAT5,SRRM2,GADD45B,PPP2R5A,ANKMY2,OAZ1,MSH3,NFATC3,USP8,EPC2…	7.EMPP	NormalvsGATA1s	3130
PUJANA_ATM_PCC_NETWORK	7.37956	1e-50	8.77529411764706e-49	1325	KYNU,TGFB1,ITGA2B,MAX,SPTLC2,IL2RG,PTPRC,U2AF1,ACTR2,B2M,ZNF804A,GYPE,LYN,JARID2,ELF1,RSRP1,EPB41,STAT1,TAOK3,TPP2,TFDP2,ARPC2,FMNL1,RCOR1,PTPN6,TGOLN2,CBFA2T3,GNAQ,RANBP9,AP3B1,MBNL1,PTEN,ZNF273,NCF4,REL,PDCD10,SP100,FCGR2A,HPS1,STAT5A,ABI1,BTAF1,SPI1,PRMT2,STK17B,PIM2,ACAP2,NCKAP1L,ATP11A,ARPC1B,UVRAG,PTP4A2,ARPC3,NFKB1,NT5C2,TRA2A,RSU1,SERTAD2,TEC,SYK,GPSM3,STK10,TMEM131L,DOCK2,STRN,EP300,LAPT…	5.EryP	Trisomy21vsGATA1s	3727
ZHENG_FOXP3_TARGETS_IN_THYMUS_UP	7.3728	2.1358339167052e-49	1.7316505635548e-47	199	KLF6,CELF2,LDLRAD4,SGMS1,JARID2,PTBP3,ELF1,RABGAP1L,TPP2,NCOA3,MBNL1,ZFAND6,JMJD1C,ATP2B1,HIF1A,C21orf91,SESN1,STAT5B,TOX,CD84,ATP6V1A,ZNF217,ARL4A,ZBTB20,AKAP13,ZC3HAV1,RAB8B,CNOT2,HIVEP2,ARHGAP15,CITED2,TBC1D5,TCF12,TOP1,PIK3R1,EVI5,MAN1A2,SDCBP,MAP3K5,MALT1,TOP2B,DUSP22,NUP153,FAM3C,SIK3,TMEM64,CDK17,STRN3,TNFAIP3,HBS1L,ARHGAP5,MAP3K1,CNOT6L,HEATR5A,WNK1,WDR37,TUBB4B,RAPGEF6,FEM1C,IBTK,LATS2,F…	5.EryP	Trisomy21vsGATA1s	3726
NUYTTEN_NIPP1_TARGETS_DN	7.37122	1e-50	8.77529411764706e-49	825	TGFB1,DLC1,SPTLC2,VCL,PTTG1IP,ATP2A3,MBOAT2,LAMA5,PLP2,INF2,PJA2,DHRS3,TXNIP,PPP1CB,DIPK2A,GNAI2,TGOLN2,AHNAK,RANBP9,GNAS,LPP,KLF2,GTDC1,ERC1,RAB10,BMP2K,SEC14L1,PDCD10,SESN1,PACSIN2,PRMT2,B4GALT1,PIR,EIF4G2,CDKN1C,LAMP2,SH3BGRL3,CCNY,LIMD2,CTSZ,S100A10,CUL3,ATP6V1A,SEL1L,ZNF326,SYK,LMBR1,STK10,YWHAG,PRKAR1A,TMED7,PLCXD1,MAP2K4,PCMTD1,FAM89B,TENT5C,MAP3K2,TLE5,HUWE1,BRWD1,CPSF6,EHBP1L1,KLF11,CAPZ…	5.EryP	Trisomy21vsGATA1s	3725
REACTOME_CLASS_I_MHC_MEDIATED_ANTIGEN_PROCESSING_PRESENTATION	7.36522	2.68056927060973e-50	3.17498538052219e-48	377	PRKN,HERC2,CD36,B2M,CYBA,RNF182,HSPA5,NCF4,ZBTB16,UBAC1,UBE2Q1,BTK,PJA2,PSMD6,HLA-C,PDIA3,TRIP12,UBE2F,UBC,HECTD3,IKBKG,HLA-B,RNF19A,SNAP23,TPP2,LNPEP,HECTD1,UBR4,BTBD6,NEDD4L,PSMA7,ASB8,ANAPC11,MKRN1,ITCH,LTN1,AREL1,UBR1,NEDD4,NPEPPS,SIAH2,UBA6,FBXW7,WWP1,RNF14,FBXW5,RNF34,ATG7,KBTBD8,UBE2V1,UBE2W,RBX1,BTBD1,KLHL2,BCAP31,UBE2L3,PSMD1,FBXW2,VAMP3,FBXL15,HUWE1,FBXL4,CDC34,KLHL21,SMURF1,UBA7,LNX1,U…	6.EryMeg	Trisomy21vsGATA1s	3142
DAZARD_RESPONSE_TO_UV_NHEK_DN	7.36119	1e-50	8.77529411764706e-49	297	AUTS2,BACH1,MED13L,SMAD3,JARID2,ELF1,RABGAP1L,NCOA3,DYRK1A,SLC25A36,ARHGEF7,LPP,ATP2B1,PPP1R12A,PHLPP1,ZMIZ1,QKI,ELF2,RAPGEF2,USP6NL,BAZ2B,KIAA0232,FNBP1L,KLF7,GSE1,ZNF217,NFKB1,CEP170,SERTAD2,TMEM131L,MORC3,STRN,SKAP2,TIPARP,E2F3,ZFC3H1,CHD1,SHOC2,ZMYND8,CLASP1,CNOT2,CENPC,IGF2BP3,MTCL1,HIVEP2,CREB3L2,FOXJ3,KBTBD2,USP24,SPEN,ATF2,KLF9,MAP3K5,PRKCD,TLK2,HELZ,VPS13B,PUM2,AFF1,CDYL,ZNF148,ARID3A,TU…	5.EryP	Trisomy21vsGATA1s	3724
MOOTHA_HUMAN_MITODB_6_2002	7.35695	1.05537032729279e-46	8.7501926469542e-45	423	ATP5PO,TUFM,ATP5F1B,MRPS2,CYB5R3,SLC25A5,ATP5PF,RPL3,ATP5MC2,MDH2,MRPL57,SHMT2,TXN2,MPST,ATP5F1D,NME4,TRAP1,CNOT7,FARSA,TOMM40,FPGS,GPX4,UQCRC1,OXA1L,MRPL12,BCKDHA,MRPL4,TOMM22,ODC1,MRPS18B,MRPS7,UROS,COX5A,SDHC,CYBA,NDUFB2,NDUFB8,NDUFS2,TST,RPS3A,MRPS12,MRPL34,CYC1,HADHA,TIMM13,HAX1,MRPS34,MTHFD2,SDHD,LYPLA2,NDUFS3,PCCB,UCP2,ACADS,TBCB,NDUFA8,DECR1,TXN,FIBP,TSPO,TIMM10,ETFA,PMPCB,NDUFAB1,TFAM,TO…	5.EryP	NormalvsTrisomy21	2874
JIANG_MELANOMA_TRM5_CD8	7.35477	4.3203428438663e-49	4.60178232055245e-47	187	TGFB1,CTSW,IL2RG,TESC,FOSB,GSTP1,NR4A2,ZFP36L1,ZFP36,HERPUD1,IER2,HSPA5,NR4A1,FOS,ANXA1,NFKBIA,PDIA3,CAPNS1,SQSTM1,KLF6,GADD45B,KLF10,CITED2,DUSP1,HMGN1,JUNB,LMNA,MALAT1,ALDOA,PIM1,ITM2B,KDM6B,HSP90B1,NDFIP1,PFN1,PRKAR1A,CSRNP1,ORAI1,PPP1R16B,ATP2B1,PKM,MYH9,ZFP36L2,DNAJB1,HSPA8,NR4A3,IFNAR1,B4GALT1,PDIA6,ANXA2,AKAP13,ICAM1,SERTAD1,TNFAIP3,FTL,UBC,STK17B,NFKBID,CHD4,ACTB,BTG2,PPP1R15A,NFKBIZ,IFRD…	5.EryP	NormalvsGATA1s	3640
GEORGES_TARGETS_OF_MIR192_AND_MIR215	7.35453	1e-50	1.24366666666667e-48	865	HERC2,MEIS2,MTSS1,LRRFIP2,LIMS1,CD164,IQGAP1,ITGB1,IL1RAP,CHD7,RHOBTB3,XK,MSN,ACTR2,STAM,MACF1,PPP1CA,GNAS,GPC4,CDKN2D,BMP2K,CDKN2A,C21orf91,DCBLD2,EHBP1L1,PPP1R12A,ZMAT3,OSBPL6,IL7,WWC2,LGMN,PRKAR1A,ATG10,PSMD6,DNAJC3,PPP1R18,ZC3H12C,ZNF641,KLF10,FOS,RSRC1,AMMECR1,FAM20B,MT1F,NMI,MAP1LC3B,AP1S2,NCOA3,CMTM6,ZNF273,CEMIP2,RAB2A,PPP1CB,CMPK1,IL15,CTNNBIP1,APC,SEMA4D,ELL2,STX7,TJP2,ANO6,MRTFB,BMPR2,…	6.EryMeg	Trisomy21vsGATA1s	3141
ACEVEDO_LIVER_CANCER_UP	7.34942	1e-50	1.1134328358209e-48	932	MTSS1,JARID2,KIFAP3,NBAS,ZFP36L1,RHOBTB3,ROCK2,RBPMS2,PTBP3,CD46,RSRC1,TRIP12,ITFG1,IQGAP1,PDGFC,SMYD3,BTAF1,ACTR3,WDR26,RSRP1,TP53BP2,AUH,NGLY1,ARHGAP12,PPP2R5A,LCOR,PTPN12,TFG,CCDC91,XPR1,SPNS1,DCP2,ITPR2,USP8,ATP6V1A,SPPL2A,KANSL1,UBA6,USP34,LYZ,SDCBP,JPT1,FNDC3B,FOCAD,S100A10,KLHL2,TXNRD1,DYNLRB1,YTHDF3,TSPAN14,AFF4,UVRAG,CPQ,SENP2,LMBR1,CD9,TMEM245,CBLB,PIAS1,WDR41,WDR11,SCYL2,RDX,SELENBP1,L…	7.EMPP	Trisomy21vsGATA1s	3266
RODRIGUES_THYROID_CARCINOMA_ANAPLASTIC_UP	7.34541	1e-50	8.77529411764706e-49	692	TGFB1,IL1RAP,RHOBTB3,FLNA,TNFSF9,ACTR2,IQGAP1,CYTOR,PLP2,PTBP3,VPS50,KMT2C,YWHAZ,CTSA,SLC7A5,AHNAK,ELF4,OSBPL8,ITGB1,MBNL1,LPP,PIK3CA,ITCH,ATP2B1,STAG1,TMOD3,SP100,BTAF1,STK17B,EIF4G2,RBM39,ACAP2,ELOVL6,AFF4,BZW1,S100A10,TXNRD1,SEL1L,SMURF1,CKAP2,UBA6,RSRC1,STRN,ARFGEF2,USP15,LNPEP,SF3B1,SENP5,ZNF644,PTPN12,BRWD1,DCUN1D1,APC,IGF2BP3,DLG1,RLF,SERPINH1,DCBLD2,COPA,CORO1C,CCDC88A,FXR1,BLZF1,AKIRIN2,…	5.EryP	Trisomy21vsGATA1s	3723
CUI_TCF21_TARGETS_2_DN	7.34424	1e-50	1.69568181818182e-48	830	MED12L,PLXDC2,MTSS1,SLC2A3,VCL,ARMC8,CD36,IL2RG,ELL2,MEF2C,RABGAP1L,CD55,SGMS1,PARD3B,PLEKHG1,LIMS1,MAST4,ITGB1,DNAJB6,MACF1,ANXA1,CBFA2T3,JARID2,DIPK2A,YES1,TXNIP,RREB1,CPEB4,INF2,NPL,ATXN7,UBR3,TP53INP1,CITED2,LMBRD1,LPP,NID1,NEAT1,PROS1,STAT1,NCOA4,GPD2,PTPRC,CAVIN2,GALNT10,IFRD1,CTDSPL,WWC2,CDYL,LRBA,NCOR1,USP25,PLD1,SPTLC2,ESCO1,PTPN12,JAK1,CPEB2,OSBPL8,FOXN2,PDE4DIP,LYZ,LNPEP,AGFG1,GALC,BTA…	7.EMPP	NormalvsGATA1s	3129
NAKAMURA_TUMOR_ZONE_PERIPHERAL_VS_CENTRAL_DN	7.33086	1e-50	8.77529411764706e-49	615	TIMP1,TESC,MALAT1,RHOBTB3,NR4A2,SLC2A3,HSPA5,NEAT1,MACF1,BACH1,TFPI,HLA-B,YPEL5,PNPLA8,ITM2B,TXNIP,HERPUD1,ANKRD9,PHKB,CFH,SLC25A36,ARHGEF7,PTEN,MIDN,WASF2,BNIP3L,CTSH,SLC22A23,ABI1,ZMIZ1,PNRC1,FNDC3B,LAMP2,FOS,SH3BGRL3,CCNY,CHMP4B,BZW1,NFIL3,NUFIP2,SERTAD2,MKRN1,ETS2,OBSL1,EP300,AUH,PRKAR1A,FTX,BTBD1,PCMTD1,ZBTB20,PDK1,ZG16B,TLE5,ZMYND8,KLF11,DENND4C,ZNF292,SYNE2,GPCPD1,CREB3L2,CITED2,ARID1B,DUS…	5.EryP	Trisomy21vsGATA1s	3722
MULLIGHAN_MLL_SIGNATURE_2_UP	7.32869	1e-50	1.73279069767442e-48	412	KYNU,APOC2,FLNA,OAZ1,S100A4,CYBA,CTSA,ATP6V0E1,CCND3,LGALS1,S100A6,IGFBP7,ARPC2,SLC16A3,LAT2,RNF167,FES,ACTR2,PECAM1,ABHD17A,IQGAP1,SERF2,PKM,C15orf39,RNPEPL1,MICAL1,LRP10,GLG1,RAC2,EHBP1L1,SYK,POLD4,NINJ2,TRAPPC10,GRN,MFSD1,APBB1IP,PPIF,PRKCD,LAMP1,LAPTM5,APOBR,TADA3,ARPC4,ELF4,ARHGAP1,SELPLG,MYO1F,M6PR,SLA,KIAA0930,C11orf21,UQCRC1,SEPHS2,EIF4E2,PLIN3,CTBS,GPS2,AP1S2,ARL6IP5,SCPEP1,KRI1,ECHDC2,C…	6.EryMeg	NormalvsGATA1s	3184
SENESE_HDAC1_TARGETS_UP	7.31675	1e-50	8.77529411764706e-49	433	KYNU,MAX,AKR1C1,CD55,ABCC4,NEAT1,ACTR2,PDE4DIP,BACH1,IQGAP1,TFPI,SQSTM1,PTBP3,CDC42SE2,YWHAZ,MBNL1,LNCAROD,NFKBIA,TMOD3,CPEB4,TGFBR2,FCHO2,G3BP2,ATP11A,EZR,MCL1,ZMAT3,PRNP,PLEKHB2,CEP170,STRN,CTNNA1,PPTC7,SF3B1,ZNF644,PTPN12,RAB8B,MAP3K2,RAB6A,FOSL1,TPP1,IGF2BP3,DLG1,DCP2,COPA,GPCPD1,AKIRIN2,TOP1,KBTBD2,YTHDF3,MOB1A,PRDM2,GSK3B,PSME4,HECTD1,NFKB2,PIK3C2A,ESYT2,BMP2,CCND2,EPG5,SOD2,TFRC,PNRC2,DDX3…	5.EryP	Trisomy21vsGATA1s	3721
JIANG_MELANOMA_TRM9_CD8	7.31028	1e-50	1.69568181818182e-48	522	LDLRAD4,IL2RG,CTSW,SPN,ZFP36L1,NR4A2,EIF4G2,PPP1R12A,LIMS1,FYB1,MACF1,MSN,PIM1,PDIA3,TLN1,ACTR3,MAP3K8,LCP2,ITM2A,MT-CO1,GNPTAB,CD164,IQGAP1,PTPRC,WDR1,HCST,MT-ATP6,ACTR2,NCOR1,SPRY1,JAK1,S100A10,SRSF7,BIN2,MYH9,SEMA4D,SYTL3,HMGN1,LNPEP,CCND3,DOK2,GNG2,APBB1IP,MT-CO2,SON,CTSC,MBNL1,DNAJA1,RHOC,CDC37,TAX1BP1,YWHAZ,FYN,SELPLG,YPEL5,YWHAB,TRAPPC1,GADD45B,ADGRE5,CD63,ILK,CDC42SE2,GNAS,CCL5,NR4A1,STK1…	7.EMPP	NormalvsGATA1s	3128
OSMAN_BLADDER_CANCER_UP	7.30566	1e-50	1.69568181818182e-48	390	PDLIM5,KYNU,TGFB1,FLNA,FYB1,RAB10,PDIA3,RPS6KC1,ACTR3,CITED2,NEAT1,IQGAP1,PTPRC,ZMAT3,USP16,RNH1,ATG5,FOXN2,SPPL2A,SLC44A1,LNPEP,CCND3,EIF4G1,IGFBP7,SESTD1,CTSC,MBNL1,KLF2,TOP1,GBE1,BSG,TUBB4B,USP47,DCUN1D1,FCER1G,NCKAP1L,P4HB,AGPS,TMOD3,WDR41,TNPO3,SMG1,SOS1,ZFYVE16,PIK3R1,TNKS2,ZNF641,MAN2A1,HSP90B1,IL15,MALAT1,ABHD17A,INO80D,STRN,ATF7IP,PARP4,SSH1,AKAP13,RASA2,XRCC4,GALNT1,PREP,RBMS1,BRWD3,UGC…	7.EMPP	NormalvsGATA1s	3127
REACTOME_TRANSLATION	7.29305	4.48912145108875e-43	3.31661626416082e-41	275	RPS4X,RPS26,EEF2,RPL7A,RPLP0,RPS3,EIF4A1,RPL10,RPL19,RPL28,RPL12,EEF1A1,RPS14,RPL18A,RPL6,DDOST,RPL8,RPL29,PABPC1,EIF3K,OXA1L,RPS5,TUFM,RPL18,EIF3F,EIF3G,EEF1D,RPL11,RPN2,RPS15,RPSA,RPL41,RPS12,EEF1G,RPL36AL,EIF3I,MRPS2,RPS2,EIF1AX,MRPL57,EIF3L,RPS7,APEH,RPLP1,EIF5,SEC61B,MRPS21,RPL35A,SSR2,FARSA,RPL30,MRPS7,MRPL27,RPL3,RPS8,MRPL3,RPL32,RPL5,MRPL10,MRPL9,MRPL54,EIF3D,EIF4H,RPL22L1,EEF1B2,SSR3,ERA…	6.EryMeg	NormalvsTrisomy21	3021
REACTOME_VESICLE_MEDIATED_TRANSPORT	7.29233	1e-50	8.77529411764706e-49	707	RHOBTB3,STON2,CD55,STAM,DNM3,CD4,ACTR2,AGPAT3,HSP90B1,RABGEF1,KIFAP3,ANK1,TRAPPC10,YWHAZ,ARPC2,TGOLN2,AP3B1,ANKRD28,TUBA1C,MYH9,RAB10,UBC,TFG,PACSIN2,CALR,HPS1,FCHO2,CLTC,EXOC4,ARF3,CHMP4B,RAB1A,USP6NL,CTSZ,ITSN2,FNBP1L,AGFG1,ARPC3,AP1G1,UBAP1,CAPZB,AP1S2,NBAS,YWHAG,PPP6R3,LNPEP,TMED7,MAP1LC3B,VTI1A,RAB5C,RAB8B,NAPA,RIN3,RIC1,RAB6A,CAPZA1,SCFD1,SPTA1,DENND4C,CUX1,DNM2,COPA,GGA1,WASL,TRAPPC1,DCTN1…	5.EryP	Trisomy21vsGATA1s	3720
DANG_BOUND_BY_MYC	7.28503	1.31352799415558e-50	2.77308212381579e-48	1010	RPS26,ZFP36L2,GAPDH,SRSF5,ACTG1,SRSF7,EIF4A1,GSTP1,HINT1,RBM8A,RBM3,CCT8,RPL10,IER2,MAFF,LSP1,JUNB,ATP5PO,APP,SLC25A3,ATP5F1B,RPL19,DDX5,SEC61B,AKR1A1,HSPA8,EIF3K,APEX1,RPL8,PMPCB,ID2,PHB2,CSTB,GPSM3,EIF3I,SOD1,CCT7,CTSC,RNF7,CTDSP1,RAC2,ENO1,SERP1,DDX3X,SNX3,RPS5,SYNGR2,RBM15B,SERTAD1,MSN,MIR155HG,NPM1,SNRPB,PRDX3,CPSF1,USP11,ATP5MC2,PTPN6,MYC,RPS15,RPL18,EIF4H,VCP,VDAC2,POLD4,PKM,HERPUD1,THRAP3…	7.EMPP	NormalvsTrisomy21	2778
REACTOME_NEUTROPHIL_DEGRANULATION	7.2787	6.15786457538703e-42	9.00980107088981e-40	465	FTH1,EEF2,SELL,SERPINB1,GMFG,CNN2,ATP8B4,ILF2,GSTP1,PFKL,EEF1A1,CCT8,CYB5R3,APRT,PECAM1,IMPDH2,JUP,ARHGAP9,TRAPPC1,DDOST,HLA-B,IQGAP2,LAMTOR1,HSPA8,ITGB2,CSTB,CTSC,VAT1,DDX3X,ATP6V0C,CTSD,A1BG,CMTM6,TUBB4B,S100A11,CTSA,B2M,GSDMD,PTPN6,MAN2B1,CAPN1,PLAC8,VCP,APEH,BST2,DYNLT1,PKM,PRDX6,SLC27A2,FTL,PNP,GRN,ARPC5,HLA-C,HSP90AB1,PYGL,TBC1D10C,ADAM8,PSAP,RAB5C,NPC2,CSNK2B,VAMP8,PYCARD,TUBB,LAIR1,CD59,C…	7.EMPP	NormalvsTrisomy21	2777
HALLMARK_OXIDATIVE_PHOSPHORYLATION	7.26968	1.50002406712066e-43	1.13062420089438e-41	200	SLC25A6,ATP5PO,ATP5F1B,PHB2,CYB5R3,SLC25A5,ECH1,ATP5PF,ATP5MC2,MDH2,ATP5F1D,GPX4,UQCRC1,LDHB,OXA1L,GPI,BCKDHA,TOMM22,ACAA1,ATP5F1A,COX5A,SDHC,ATP6V0C,NDUFB2,NDUFB8,ATP6V0E1,NDUFS2,MRPS12,MRPL34,CYC1,HADHA,TIMM13,ATP6V1G1,SDHD,NDUFS3,HTRA2,TIMM50,NDUFV1,NDUFA8,DECR1,TIMM10,ETFA,NDUFAB1,ECHS1,SLC25A11,NDUFB5,PMPCA,FDX1,ECI1,ACADM,IDH2,GRPEL1,POLR2F,MRPL11,PDHB,ATP5PB,BAX,ATP5MF,VDAC1,PDHA1,LDHA,ATP…	5.EryP	NormalvsTrisomy21	2873
REACTOME_SIGNALING_BY_RHO_GTPASES_MIRO_GTPASES_AND_RHOBTB3	7.26082	1e-50	1.1134328358209e-48	652	DLC1,ARHGAP6,STAM,FLNA,PPP1R12A,ACTN1,CDC42BPA,PRKCB,ITGB1,RHOBTB3,ROCK2,CLTC,FNBP1L,YWHAZ,CTNNB1,PLEKHG1,IQGAP1,CLASP2,ACTR3,SOS1,ARHGEF7,MRTFA,CDC42SE2,PIK3CA,ACTR2,NET1,ARHGAP21,KDM4C,TMOD3,ERBIN,TUBA1C,ARHGAP12,PPP2R5A,NCOA2,PICALM,USP9X,SCFD1,ARHGAP15,PLD1,ARHGAP18,MYH9,CENPC,ABI1,CYBA,NDEL1,DBN1,PREX1,MTR,MAPK1,TAOK1,CCDC88A,WASL,STAM2,CTNNA1,PPP1CB,CUL3,CLASP1,ARHGAP10,GRB2,FRS2,TUBB1,WDR1…	7.EMPP	Trisomy21vsGATA1s	3265
MARTENS_BOUND_BY_PML_RARA_FUSION	7.26063	1e-50	1.165e-48	439	ZBTB16,SPN,TESC,TYROBP,FOSB,STXBP2,TUBA1C,APLP2,CD164,CHD7,C15orf39,TAGLN2,PTPN6,PSAP,SLC7A5,CCND3,MYO1F,OAZ1,PDE4DIP,FMNL1,SQSTM1,STK24,KLF2,SH3BGRL3,ATP6V0C,LAPTM5,SPI1,CELF2,ANXA11,ZMIZ1,FERMT3,ELF4,ADAM8,CXXC5,SMAD3,F11R,CTSD,DNM2,LCP2,MIDN,MBD6,DCTN1,APBB1IP,IRF2BP2,PKM,MYH9,VASP,PREX1,LYN,RAC2,SREBF1,MBP,ICAM4,FAM89B,RCSD1,B4GALT1,C11orf21,ABHD2,CSK,PLAC8,ICAM1,TNFAIP3,GSE1,ATG16L2,GGA1,WDR…	5.EryP	NormalvsGATA1s	3639
RODRIGUES_THYROID_CARCINOMA_ANAPLASTIC_UP	7.25823	1e-50	1.69568181818182e-48	692	TGFB1,FLNA,IL1RAP,CYTOR,EIF4G2,VPS50,RHOBTB3,ITGB1,USP15,CTSA,PLP2,SEMA3C,SLC7A5,JPT1,LPP,PTBP3,RUNX1,RSRC1,IQGAP1,SP100,IFRD1,SLC16A3,CDYL,ACTR2,USP16,APC,TNFSF9,PTPN12,S100A10,CCDC88A,ATG5,OSBPL8,TANK,ELOVL6,SENP5,LNPEP,BTAF1,EIF4G1,ZNF644,DCBLD2,MBNL1,BLZF1,HECTD1,KIF5B,STAM2,DDX3X,TOP1,CDKN2A,TP53RK,USP47,YWHAZ,DCUN1D1,LCORL,AMMECR1,AHNAK,RARS2,TXNRD1,ITPRID2,AGPS,TMOD3,TTC3,STK17A,SERPINH1,Z…	7.EMPP	NormalvsGATA1s	3126
SPIELMAN_LYMPHOBLAST_EUROPEAN_VS_ASIAN_DN	7.25716	1e-50	1.69568181818182e-48	584	PDLIM5,MEF2C,ASAH1,KIFAP3,PIP5K1B,PDE3B,GLG1,AP3B1,PDCD10,ARHGEF7,PTBP3,CD164,PTPRC,CLTC,TFG,CD46,ATP6V0E1,CNOT2,NPTN,SLC16A3,CDYL,ACTR2,USP16,PTPN12,JAK1,ATG5,SYK,SEMA4D,PSAP,GALC,DOK2,ORC4,PTPN1,SON,DNAJA1,KIF5B,TAX1BP1,RHOB,PDK3,AP2B1,MAP2K1,YWHAZ,XPNPEP1,MYLIP,CYB5R4,CD63,ILK,NFATC3,USP8,TXNRD1,NAPA,MCM3AP,TTC3,NSF,NFIL3,PCYT1A,STK17A,ANXA11,SQSTM1,MAN2A1,STAT3,USP14,TMBIM6,SRSF6,BIRC2,MED21,…	7.EMPP	NormalvsGATA1s	3125
CUI_TCF21_TARGETS_2_DN	7.25573	1e-50	1.24366666666667e-48	830	SLC2A3,MED12L,VCL,MTSS1,IL2RG,CD36,LIMS1,MEF2C,PARD3B,ARMC8,NID1,PLXDC2,ITGB1,SPTLC2,INF2,LYZ,NPL,RABGAP1L,SGMS1,CAVIN2,CD55,LRBA,MACF1,TXNIP,MAST4,GPD2,DIPK2A,PROS1,GSN,PTPRC,NCOA4,EXOC3L2,ATP2A3,JARID2,ELF1,TMBIM1,CALM1,TPM1,TUBB1,PLEKHG1,FYN,CITED2,FOXN2,KMT2C,CTDSPL,SERPINI1,STAT1,JAK1,WWC2,LPP,DNAJB6,UBR3,NEAT1,CPEB2,TMOD3,ATG10,RANBP9,RREB1,CBFA2T3,TUT7,LMBRD1,YPEL5,TP53INP1,CPEB4,EBAG9,YES…	6.EryMeg	Trisomy21vsGATA1s	3140
DEBIASI_APOPTOSIS_BY_REOVIRUS_INFECTION_UP	7.24696	3.67807904601023e-48	2.94997759184842e-46	286	KLF6,NR4A2,SLC2A3,DNAJB6,CD55,BACH1,MED13L,STAT1,GNAQ,DYRK1A,SPRY1,ITCH,UBE2H,NFKBIA,SP100,IRF9,PIR,STK17B,MCL1,BAZ2B,AGFG1,ZNF217,ZFP36,MAP2K4,ZBTB20,MED21,ZC3HAV1,MKLN1,SECISBP2L,TIPARP,SNRK,SHOC2,PPP1R15A,ANXA1,ATF3,ZNF292,RLF,WASL,FXR1,BLZF1,FOXJ3,IRF7,DUSP1,USP9X,GABARAPL1,WASHC4,CD2AP,ATF6,NR1D2,NF1,ZNF529,CDK17,STRN3,TNFAIP3,RAB21,RYBP,ARHGAP5,MAP3K1,MID1,PANK3,GNA13,NRAS,YTHDC1,IFRD1,SOCS…	5.EryP	Trisomy21vsGATA1s	3719
JIANG_MELANOMA_TRM8_CD4	7.23454	1e-50	1.73279069767442e-48	423	LAT,IL2RG,PLP2,S100A11,ITM2A,TMSB4X,HCST,SPN,TAGLN2,B2M,ZFP36L1,S100A4,SLC2A3,MYL12A,ARHGDIB,PRMT2,EMP3,FYB1,RPS10,CCND3,PFN1,LY6E,MT-CO1,S100A10,CD4,S100A6,NR4A2,SH3BGRL3,CITED2,ARPC1B,TSC22D3,GPSM3,TXNIP,HLA-B,PIM1,RPL36AL,ANXA1,CORO1B,NR4A1,LCP2,CDC37,CALM1,GMFG,ITM2B,TPM3,ZFP36,STOM,MYH9,DAZAP2,SOD1,FOSB,APBB1IP,LAPTM5,OSTF1,FOS,PTPRCAP,NDFIP1,MYL12B,YWHAH,SELPLG,FTH1,CFL1,BCAP31,HSPA8,M6PR,S…	6.EryMeg	NormalvsGATA1s	3183
DOUGLAS_BMI1_TARGETS_DN	7.23318	3.50995083172159e-48	3.49123109395241e-46	307	IL1RAP,PIK3CB,PHKB,CPEB4,STAT1,OSBPL8,LPP,NGLY1,CLIC2,DCP2,MLC1,AGPAT3,ATP6V1A,SP100,COG5,MYEF2,VEZT,CD2AP,PPP3CA,SLC10A7,MICU1,TMEM164,DIDO1,LIPH,TDG,TACC1,PCMTD1,SQSTM1,FAM91A1,SNRK,PCYT1A,RAB8B,TAFA2,IRF9,FAM234A,KPNA6,RPRD1B,SLC20A2,SLC33A1,ANKS1A,RO60,TMBIM1,APAF1,SOAT1,SLC7A11,RASA1,MFSD14B,NHLRC2,FAM199X,GOLT1B,ZFYVE26,LCP1,MAPK6,CASP8,STK38L,DDI2,ETNK1,IREB2,DNAJC16,MTMR14,UBE4B,SLC9A8,YI…	7.EMPP	Trisomy21vsGATA1s	3264
LOPEZ_MBD_TARGETS	7.23196	1e-50	9.81842105263158e-49	925	IFITM2,PCBP2,EEF2,AREG,IFITM1,RPLP0,APRT,EIF4A1,GSTP1,ANXA1,SOD1,AHCY,RPS14,PKM,SRGN,EIF1,NPDC1,RACK1,ENO1,SPINT2,CORO1A,APEX1,NR4A1,EIF3K,OXA1L,HLA-B,KDELR1,APP,FES,MAZ,DAZAP2,PUF60,CDC37,RPL18,CTSC,ATP5MC2,FKBP8,PTTG1IP,SON,EEF1D,ECH1,RPL11,NUCB2,ADSL,BTF3,APH1A,PPP2R1A,PPIF,RPL36AL,EIF3I,RPS2,ARPC3,CAPN1,CCS,SF3A1,NFKBIA,HLA-E,EIF1AX,CCNI,HSPA8,ATP6V1G1,RAN,ILF2,NCOA4,RPS7,ARHGDIA,LRPAP1,MAT2A…	6.EryMeg	NormalvsTrisomy21	3020
JOHNSTONE_PARVB_TARGETS_2_DN	7.2227	1.34522929364984e-46	1.25442631632848e-44	332	MBNL1,RREB1,CDYL,ATP2C1,RANBP9,PDGFC,AGTPBP1,SESTD1,RFX7,PDZD8,OSBPL8,NET1,AGFG1,VPS13A,DCUN1D1,MOB1B,DCP2,CDK13,GLS,MYCBP2,FAF1,USP34,ANGPT1,TOP2B,STAG1,HIPK1,E2F3,RNF19A,TM9SF3,FOXJ3,SLC44A1,ZDHHC2,NUFIP2,PPP3CA,ATP11B,CTBP2,GBE1,IFRD1,HOOK3,OXR1,OPA1,STK17A,PPP2R5C,GXYLT1,TAF2,TMEM165,RBM26,SLC5A3,LNPK,PRIM2,TBL1XR1,GMDS,PTAR1,EXOC5,KPNA6,CUL5,SEC24B,CCDC126,RAP2B,PPM1A,RO60,STK17B,C1GALT1,MAP…	7.EMPP	Trisomy21vsGATA1s	3263
REACTOME_NEUTROPHIL_DEGRANULATION	7.20043	1e-50	1.165e-48	465	LRRC7,CYBA,ASAH1,TYROBP,S100A11,GSTP1,CD63,HLA-B,PFKL,CAPN1,B2M,LYZ,SLC2A3,PTPN6,CST3,PSAP,VCL,CTSA,BIN2,ACTR2,CD55,CYB5R3,LAMTOR1,TMBIM1,IQGAP1,MAN2B1,CFP,TRAPPC1,VCP,ATP6V0C,FCGR2A,HLA-C,LAMP1,CTSZ,FCER1G,ALDOA,CTSH,RAB5C,DNAJC3,ADAM8,CD33,TUBB4B,NCKAP1L,CTSD,GRN,CD68,GMFG,TSPAN14,ALDH3B1,ARMC8,DDX3X,UBR4,YPEL5,PKM,ADGRE5,STK10,HSPA8,JUP,PDXK,DDOST,NBEAL2,CMTM6,ARPC5,B4GALT1,PTPRC,ANXA2,CTSC,PL…	5.EryP	NormalvsGATA1s	3638
GRYDER_PAX3FOXO1_ENHANCERS_IN_TADS	7.19135	1e-50	1.1134328358209e-48	990	STXBP5,CRPPA,HERC2,DNM3,MEIS2,ZNF804A,LRRFIP2,AUTS2,SGMS1,STK24,MYO18B,IL1RAP,JARID2,CHD7,IRX1,ZFP36L1,MED13L,UBR3,USP15,ITGB1,CDYL,MAP4K4,VPS13B,GSE1,ZFAND3,YWHAZ,ATP9B,RPS6KC1,CTNNBL1,NCOA1,PDGFC,BTAF1,TOP1,ATAD2B,VTI1A,ZNF644,ACSL3,GLUL,MAN2A1,NLGN1,TCF12,FOXN2,RAD51B,TPP2,ARHGAP12,QKI,ZEB2,PTPN12,WDR1,DCP2,DNAJB6,TFPI,RUNX1,ARHGAP15,ANKRD17,TANK,MYH9,RNF216,CNOT2,FAF1,PREX1,ATF7IP,RNGTT,TMEM1…	7.EMPP	Trisomy21vsGATA1s	3262
BLALOCK_ALZHEIMERS_DISEASE_UP	7.18931	1e-50	1.165e-48	1615	TGFB1,IL2RG,GYPB,FLNA,ASAH1,ZBTB16,PTTG1IP,TXNIP,COL18A1,CD164,ZFP36L1,C15orf39,GPC4,RHOBTB3,AKR1C1,ZFP36,MLC1,ARHGAP6,IER2,MAX,CLIP2,SLC7A5,PRMT2,SERPING1,ANXA1,NFKBIA,CCND3,ARPC1B,RUFY1,S100A4,GADD45B,KLF2,TMBIM1,IQGAP1,GPSM3,LPP,MAN2B1,NID1,LDLRAD4,SLC25A21,TES,SEPTIN6,CLIC1,LMNA,LAMP1,SNTA1,PTGS1,PIM1,CTSH,MYCN,PACSIN2,ATP6V0E1,ZMIZ1,ELF4,LAT2,SUMO3,ELOVL6,YES1,BMP2K,G6PD,CDKN1C,C21orf91,OS9,…	5.EryP	NormalvsGATA1s	3637
MARTENS_BOUND_BY_PML_RARA_FUSION	7.1879	1e-50	8.77529411764706e-49	439	APLP2,TYROBP,TESC,ZBTB16,CD164,SPN,CHD7,STK24,CELF2,STXBP2,PDE4DIP,PSAP,C15orf39,LYN,SMAD3,SQSTM1,MYO1F,FOSB,TAGLN2,FMNL1,CCND3,SLC7A5,PTPN6,ELF4,WDR26,OAZ1,PTEN,MIDN,ANKRD11,KLF2,TUBA1C,MYH9,ABHD2,LCP2,F11R,SPI1,B4GALT1,ZMIZ1,SH3BGRL3,IRF2BP2,GSE1,LMBR1,AUH,LAPTM5,ADAM8,FAM89B,ATP6V0C,ARID2,APBB1IP,PREX1,CUX1,VASP,DNM2,MBD6,HIVEP2,GGA1,RAB11FIP1,SDE2,DCTN1,DDX5,MAP2K3,ICAM1,PRKCD,ATG16L2,MYO9B,P…	5.EryP	Trisomy21vsGATA1s	3718
DOUGLAS_BMI1_TARGETS_DN	7.1839	2.14405171667125e-47	3.19935397161683e-45	307	IL1RAP,PIK3CB,CPEB4,MLC1,LPP,STAT1,VEZT,SP100,PHKB,AGPAT3,CLIC2,DCP2,OSBPL8,TMEM164,LIPH,FAM234A,TMBIM1,NGLY1,TDG,IRF9,PCYT1A,COG5,SQSTM1,MTMR14,BIRC2,MICU1,MFSD1,ATP6V1A,MYEF2,ATP6V0D1,ZFYVE26,SOAT1,STAT6,SLC7A11,GOLT1B,CSNK1D,MVP,MR1,TPP1,CASP8,YIPF4,CHUK,TACC1,SLC10A7,ZDHHC12,TPM3,NIPAL3,APAF1,DIDO1,SLC20A2,PPCS,HMOX2,SHKBP1,ARAP1,DDI2,SUN2,ICAM2,M6PR,TMEM127,PBXIP1,EXD2,TAFA2,GNAI3,KLHL12,STK…	7.EMPP	NormalvsGATA1s	3124
REACTOME_INFECTIOUS_DISEASE	7.18202	1e-50	1.24366666666667e-48	993	TGFB1,RPS10,TUBA1C,FCGR2A,B2M,CD9,CD4,ACTB,ITGB1,CYBA,YWHAZ,PRKAR2B,DAD1,ACTR2,STAM,ARPC3,TXNIP,ROCK2,PPP1CA,GNAS,PTPN6,GPC4,RPN1,CALM1,ARPC1B,GNAI2,TUBB1,FUT8,SMAD3,CLTC,SNRPD3,FYN,ARPC5,ARPC2,BTK,STAT1,JAK1,PRKAR1A,ARPC4,PSMD6,RCOR1,DNAJC3,MYH9,MGAT4B,LYN,VPS25,HLA-C,PLCG2,SEC11A,CDC42,RPS27L,GNG5,YES1,VCP,UBC,FNTB,ACTR3,RAB5C,RPS4Y1,YWHAB,MED13L,AP2M1,TUBB2A,YWHAH,WASF2,NMI,GNG2,POLR2L,MAP1LC3…	6.EryMeg	Trisomy21vsGATA1s	3139
REACTOME_CELL_CYCLE	7.17628	1e-50	1.24366666666667e-48	627	HERC2,TUBA1C,MAX,LMNA,YWHAZ,PRKAR2B,CCND3,PRKCB,CDKN2D,CDKN2A,PPP1R12A,TUBB1,ZNF385A,PSMD6,KIF2A,ORC4,LYN,RAB8A,UBC,YWHAB,TUBB2A,YWHAH,POLR2L,CLASP2,PPP2R5A,POLD4,CHMP4B,CCND2,RAB2A,DYNC1I2,PPP1CB,SYNE2,RAB1B,JAK2,CHTF8,PSMA7,PRKACA,ANAPC11,BLZF1,TUBB4B,BABAM2,POLR2J,CKAP5,TFDP2,CHMP2A,AKT2,TAOK1,DYRK1A,SSNA1,YWHAE,CHMP4A,RB1,DCTN1,SPAST,CDK11A,PPP6R3,LPIN2,STAG3,DYNC1I1,DYNC1LI2,RBX1,E2F3,NUMA1,…	6.EryMeg	Trisomy21vsGATA1s	3138
REACTOME_SIGNALING_BY_RHO_GTPASES_MIRO_GTPASES_AND_RHOBTB3	7.16745	1e-50	8.77529411764706e-49	652	DLC1,CYBA,DBN1,RHOBTB3,FLNA,ARHGAP6,STAM,ACTN1,ACTR2,PRKCB,IQGAP1,TPM3,TAOK3,CDC42SE2,RHOB,YWHAZ,PPP1CB,ARPC2,FMNL1,RHOC,CDC42,ITGB1,ARHGEF7,CTNNB1,PIK3CA,TUBA1C,MYH9,WASF2,NCF4,ARHGAP21,TMOD3,PPP1R12A,ABI1,GMIP,CLTC,ARHGAP12,MRTFA,NCKAP1L,ARPC1B,VCP,CLASP2,FGD4,ITSN2,CUL3,FNBP1L,ARPC3,CAPZB,NET1,STK10,DOCK2,NCOA2,CTNNA1,YWHAG,AKAP13,FLOT2,ESYT1,RANBP2,CLASP1,SCFD1,LAMTOR1,MACO1,CENPC,PREX1,SOS2,…	5.EryP	Trisomy21vsGATA1s	3717
MARTORIATI_MDM4_TARGETS_FETAL_LIVER_DN	7.16346	1e-50	8.77529411764706e-49	512	RHAG,VCL,RELN,ACTR2,PSAP,SMAD3,PJA2,ELL2,TGOLN2,WDR26,PTEN,ANKRD28,EPHA3,LPP,ATP2B1,DDX17,RAB10,ARF3,QKI,ARPC1B,ARID4B,RBM25,CUL3,HP1BP3,AP1G1,NUFIP2,GNG2,YWHAG,TENT5C,CLIC1,MACO1,SON,MAPKAPK2,SH3GLB1,MT-ND3,ATF7IP,NORAD,CHP1,NUDT4,MEF2A,GPBP1,HMG20B,USP22,ROCK2,YTHDF3,USP48,PPM1B,PIK3R1,RAB7A,ARNT,PIM1,SEC24B,CERT1,FADS2,STK3,NFATC3,MDM4,PPP6R1,COP1,TFRC,MAGT1,PAFAH1B2,DDX3X,TRAK2,RNF38,ZNF148,A…	5.EryP	Trisomy21vsGATA1s	3716
SCHLOSSER_SERUM_RESPONSE_DN	7.16294	1e-50	1.24366666666667e-48	684	LDLRAD4,FCGR2A,MYL12A,CD9,CD164,SPTLC2,LYZ,YWHAZ,PRKAR2B,KIFAP3,RABGAP1L,RSU1,MAP3K5,PDCD10,ACTR2,CD55,BACH1,GLUL,PTPRC,HSPA5,PPP1R12A,RSRP1,PIM2,IL7,STAT1,PJA2,PTP4A2,PRKAR1A,PSMD6,NFE2,TP53BP2,HMGN3,SEC11A,SUB1,HMGN1,UBC,NMI,MAP1LC3B,CLASP2,SP100,ZNF273,TPP2,C1D,PAK2,INSR,DECR1,EVI5,COQ2,ABI1,ATAD2B,NCKAP1L,TOP2B,PCMT1,ATP5MF,CAPZA1,SDCBP,ZFYVE16,NPTN,NDUFS4,MORC3,POLR2J,NCOA2,TAX1BP1,LAMP2,FAM…	6.EryMeg	Trisomy21vsGATA1s	3137
REACTOME_CELL_CYCLE	7.1594	1e-50	1.1134328358209e-48	627	HERC2,PPP1R12A,LYN,PRKAR2B,MAX,PRKCB,YWHAZ,DYRK1A,CLASP2,RAB2A,LMNA,CDC14A,TUBA1C,PPP2R5A,ORC4,NIPBL,TFDP2,ESCO1,EP300,COP1,CENPC,JAK2,PSMD1,POLR2A,NDEL1,STAG1,UBE2E1,E2F3,CDK11A,PSME4,MAPK1,TAOK1,EML4,PPP1CB,CLASP1,ANKRD28,BLZF1,TUBB1,PPP6R3,BABAM2,CKAP5,CDKN2A,RANBP2,WRN,DIDO1,CEP192,CEP70,AHCTF1,PCM1,MNAT1,PPP2CB,CCND3,PPP2R5C,PPP1R12B,RAB1A,SPAST,CHMP4B,GSK3B,PPP2R2A,SMARCA5,PRIM2,TUBGCP3,CCN…	7.EMPP	Trisomy21vsGATA1s	3261
MULLIGHAN_MLL_SIGNATURE_1_UP	7.15926	7.76578726871872e-46	7.93812391769577e-44	378	S100A4,FLNA,OAZ1,FCGR2A,S100A6,CYBA,CTSA,CCND3,ACTR2,ATP6V0E1,SLC16A3,ABHD17A,CALM1,ARPC1B,SLC43A3,RNF167,EHBP1L1,ARPC2,ELF4,PRKCD,GLG1,ARPC4,ABHD2,FUCA1,PECAM1,C15orf39,TRAPPC10,LGALS1,NINJ2,C11orf21,FES,LAT2,TGOLN2,MYO1F,SCPEP1,ARHGAP1,KIAA0930,APOBR,SYK,POLD4,M6PR,GRN,INSR,MICAL1,MFSD1,LAPTM5,TADA3,LAMP1,RAB6A,GRB2,MRTFA,FAM53B,DNM2,SFMBT1,POLR2J,PLD3,SELPLG,RAC2,ARL6IP5,PKM,CHD3,DHRS7B,HDAC6,…	6.EryMeg	Trisomy21vsGATA1s	3136
JIANG_MELANOMA_TRM8_CD4	7.15633	1e-50	8.77529411764706e-49	423	LAT,KLF6,TMSB4X,ITM2A,MT-ATP6,MALAT1,NR4A2,SLC2A3,IL2RG,PTPRC,SPN,ZFP36L1,CD4,HCST,B2M,EMP3,PLP2,HLA-A,HLA-B,S100A11,YPEL5,NDFIP1,FOSB,FYB1,RSRP1,TAGLN2,MT-CO1,STAT1,TPM3,CDC42SE2,ITM2B,YWHAZ,PTGER4,TXNIP,CSRNP1,CCND3,S100A4,AHNAK,RPS10,MBNL1,MYH9,GADD45B,NFKBIA,LCP2,PRMT2,PNRC1,FOS,SH3BGRL3,ARPC1B,MCL1,PRNP,S100A10,ODF2L,SYTL3,GPSM3,ARL4A,GNG2,LAPTM5,PTPRCAP,ZFP36,ZC3HAV1,APBB1IP,CORO1B,TLE5,LRR…	5.EryP	Trisomy21vsGATA1s	3715
BUYTAERT_PHOTODYNAMIC_THERAPY_STRESS_UP	7.15512	1e-50	1.165e-48	803	TXNIP,RELN,AKR1C1,ZFP36,TNFSF9,SLC2A3,BACH1,DNAJB6,HERPUD1,ETS2,CLIP2,FOS,NFKBIA,CD55,DHRS3,PDE4DIP,RHOB,SQSTM1,KLF6,KLF10,CITED2,DUSP1,STAM,PTGS1,PIM1,RELB,TSC22D1,ZMIZ1,TFPI,IRF9,NFIL3,KDM6B,RABGEF1,F11R,CDKN1C,RPS6KC1,PTBP3,SPTLC2,ATP2B1,YPEL5,KLF11,SOD2,EIF5,DNAJB1,STK10,TFDP2,ABCA1,MORC3,IRF7,ARHGEF7,HDAC5,SERPINH1,WASHC2C,MBP,ARHGAP12,BMP2,MAFF,GSE1,FTL,SENP5,PER1,MKRN1,PRKCD,TICAM1,NUDT4,S…	5.EryP	NormalvsGATA1s	3636
FLECHNER_BIOPSY_KIDNEY_TRANSPLANT_OK_VS_DONOR_UP	7.15163	1e-50	1.1134328358209e-48	556	PDLIM5,AUTS2,APLP2,ACTN1,BMP2K,CFH,CDC42BPA,PTPRC,AFF1,RHOBTB3,PHKB,CD46,FNBP1L,SMG1,DYRK1A,HSPA5,CLASP2,RAB2A,NCOA3,PDIA3,STAT1,PJA2,ACTR2,RSRP1,ACSL3,AUH,ATF2,QKI,ZEB2,PTPN12,NCOA2,PICALM,CDK13,GLS,TFPI,GABBR1,SCFD1,ATP6V1A,TANK,MORC3,MYH9,ABI1,USP14,NPTN,LYZ,SDCBP,TOP2B,MSN,HIPK1,CAPZA1,E2F3,CITED2,TGFBR2,IGF1R,FOXJ3,WWP1,PUM1,CD2AP,CREB3L2,FYN,CTNNA1,CD9,MED13,SELENBP1,LTN1,GBE1,TEK,CREBBP,AK…	7.EMPP	Trisomy21vsGATA1s	3260
REACTOME_VESICLE_MEDIATED_TRANSPORT	7.12659	1e-50	1.1134328358209e-48	707	DNM3,ANK1,STON2,STAM,CD36,KIFAP3,CD55,NBAS,RAB10,RHOBTB3,CLTC,AP3B1,EXOC4,FNBP1L,YWHAZ,RABGEF1,CD4,ACTR3,VTI1A,SPTA1,TRAPPC10,ACTR2,AGFG1,DENND4A,MAN2A1,AP1G1,PACSIN2,LNPEP,TUBA1C,TFG,PICALM,ANKRD27,FCHO2,SCFD1,AGPAT3,DENND1A,HSP90B1,MYH9,COG5,TRAPPC9,DENND4C,AP2B1,DNAJC6,CAPZA1,HPS1,USP6NL,PUM1,WASL,UBAP1,DNM2,RIC1,STAM2,GJA4,RIN3,GRB2,RAB6A,VPS37A,ANKRD28,RAB3GAP2,TUBB1,PPP6R3,SEC31A,GALNT1,RAB…	7.EMPP	Trisomy21vsGATA1s	3259
REACTOME_CLASS_I_MHC_MEDIATED_ANTIGEN_PROCESSING_PRESENTATION	7.10471	4.86873830880307e-50	4.12680898242751e-48	377	HERC2,CYBA,PRKN,ZBTB16,HSPA5,RNF182,B2M,HLA-A,PDIA3,HLA-B,PJA2,TPP2,HLA-C,UBR4,ITCH,UBE2H,NCF4,RNF19A,UBC,CALR,UBE2Q1,NPEPPS,TRIP12,CUL3,SMURF1,MKRN1,UBA6,LNPEP,BTBD1,HUWE1,FBXW7,AREL1,SIAH1,WWP1,UBE2E1,LONRF1,PSME4,SEC24B,RNF4,HERC1,HECTD1,SMURF2,SEC31A,FBXO11,UBE2W,SIAH2,KLHL2,ITGAV,MGRN1,FBXL20,NEDD4L,RNF115,FBXW11,PSMD1,UBE2K,KBTBD8,CTSS,FBXW2,UBR1,UBE2Q2,UBE2G1,WSB1,UBE2J1,LNX1,PIK3R4,FZR1,S…	5.EryP	Trisomy21vsGATA1s	3714
BLANCO_MELO_COVID19_SARS_COV_2_INFECTION_A594_ACE2_EXPRESSING_CELLS_UP	7.10465	1e-50	8.77529411764706e-49	480	KLF6,ZFP36L1,SERPING1,CD83,FOSB,FYB1,CSRNP1,HSH2D,CFP,RELB,CCNL1,NFKBIA,REL,SP100,CYLD,RBM39,PNRC1,FOS,ARID4B,HOTAIRM1,KLF7,NFIL3,KDM6B,NFKB1,ZBTB43,SERTAD2,PPTC7,CHD2,ZBTB10,ADAM8,ZFP36,ZBTB20,TIPARP,FBXW7,PPP1R15A,KLF11,FOSL1,ZNF267,ATF3,ZNF292,HIVEP2,TANK,FOXN2,GPBP1,TICAM1,INO80D,IRF7,DUSP1,PER1,IER2,ICAM5,NOCT,PIM1,N4BP3,CRY1,FRS2,NFKB2,MDM4,BMP2,TLK2,MIER1,SMCHD1,FERMT3,CHIC2,ARID3B,PPP4R2,…	5.EryP	Trisomy21vsGATA1s	3713
REACTOME_CELLULAR_RESPONSES_TO_STIMULI	7.10279	1e-50	1.24366666666667e-48	750	TLN1,RPS10,TUBA1C,MT-CO1,MEF2C,LMNA,LAMTOR1,CYBA,MAP3K5,HIGD1A,ATP6V0E1,TNIK,TXNIP,BACH1,SULT1A3,HSPA5,NCF4,CDKN2D,CDKN2A,CAPZB,TUBB1,CLEC1B,GSTP1,CITED2,SQSTM1,PRKCD,DNAJB6,PSMD6,DNAJC3,EIF2AK1,ATP6V1A,SERPINH1,TALDO1,ATP6V0C,RPS27L,ATP6V0D1,ARNT,VCP,HERPUD1,UBC,FOS,RPS4Y1,DNAJB11,ADD1,MT-CO2,TUBB2A,MT1F,MAP1LC3B,RPL36AL,DCP2,TCIRG1,MAFG,NCOR1,DYNC1I2,FKBP5,PDIA5,SESN1,MAP4K4,NCOA1,WIPI1,GSR,PSM…	6.EryMeg	Trisomy21vsGATA1s	3135
WAKABAYASHI_ADIPOGENESIS_PPARG_RXRA_BOUND_8D	7.10132	1e-50	8.77529411764706e-49	830	DLC1,ASAH1,HSPA5,PTTG1IP,ABCC4,LUZP1,NID1,BSG,CST3,LTC4S,LMNA,HSP90B1,YPEL5,ARMC8,PNPLA8,STAT1,TXNIP,GNAI2,PTPN6,MBNL1,PIM3,BNIP3L,BMP2K,STAG1,STAT5A,ABI1,ADIPOR2,PNRC1,RNASET2,G3BP2,FNDC3B,LMBRD1,QKI,USP6NL,PRNP,KIAA0232,FNIP1,PTP4A2,KDM6B,SERPINE1,ZNF326,NET1,RPN1,PBX2,LMBR1,TALDO1,YWHAG,LNPEP,ATP6V0C,MKLN1,SIPA1L1,TIPARP,ESYT1,RANBP2,ZMYND8,EHBP1L1,ANXA1,KLF11,RIOK3,BAZ2A,PFKL,SH3GLB1,MBD6,MYC…	5.EryP	Trisomy21vsGATA1s	3712
IVANOVA_HEMATOPOIESIS_MATURE_CELL	7.09949	1.51452583428164e-44	1.3952335525197e-42	289	RHAG,MTSS1,FYB1,KEL,LIMS1,ANKRD9,CCND3,SLC22A23,SPECC1,SPTA1,CDKN2D,BMP2K,RNF167,EHBP1L1,CTSH,UBAC1,PIK3CB,SLC40A1,CMAS,LGMN,STX11,GPX4,GYPA,NUDT4,TENT5C,YPEL5,SNCA,CPEB4,KLF11,THBS1,DAAM1,SPTB,ADD1,MPP1,LNPK,RNF19A,HECTD1,FBXO34,WDR26,SYNJ1,WIPI1,TRAK2,FN3K,AGFG1,NOCT,TMEM9B,LAMP1,RAB6A,MKRN1,STRADB,SDCBP,LAMP2,TFDP2,RIOK3,GPCPD1,ANO10,SLC66A3,ATP6V0A1,ATP6V1E1,HAGH,BNIP3L,CHP1,AP2A2,DERL2,ABCB6…	6.EryMeg	Trisomy21vsGATA1s	3134
YAO_TEMPORAL_RESPONSE_TO_PROGESTERONE_CLUSTER_17	7.08665	3.87105886070197e-41	2.57909296594269e-39	183	IMPDH2,GSTP1,ADSL,LAMTOR1,PHB2,PUF60,DDOST,EIF1AX,NME2,PSMG1,MDH2,PRELID1,LSM7,MARCKSL1,CDK4,NDUFA11,DDX54,TALDO1,SRSF9,ERP29,UBE2S,RPN2,MRPS7,PSMD8,CSNK2B,SMDT1,TUBB,DRAP1,PDCD2,MRPS12,MRPL34,TIMM13,KRT10,MRPS34,CRYGD,UFC1,NDUFS3,LRPAP1,TWF2,RNF7,PTDSS1,UBA1,PSMD13,ABRACL,FKBP1A,PSMA7,NDUFAB1,STUB1,EIF4E2,CMBL,ROMO1,AKT1,EIF4A3,SLC39A4,MRPL21,MRPL58,TMED10,EVL,SERF2,GRPEL1,COPE,ARL2BP,LYPLA1,KRT…	5.EryP	NormalvsTrisomy21	2872
FISCHER_DREAM_TARGETS	7.08575	1e-50	1.24366666666667e-48	907	MEIS2,TUBA1C,GPD2,CDKN2D,STAT1,SCLT1,ABHD2,NET1,KIF2A,JPT1,TP53INP1,EBAG9,RAB8A,RSRC1,C1orf174,LNPK,ZNF273,DCP2,RDX,FKBP5,AP2B1,EXOC4,IFNAR1,KHSRP,HNRNPF,ZNF518A,CKAP5,PKNOX1,TOP1,DYRK1A,FAF1,UACA,CCDC14,ANP32E,ZNF267,PTBP1,NT5C3A,PGP,PBRM1,FAR1,KATNA1,GPATCH11,XRCC2,VPS26C,RAD51B,CEP85,NAPEPLD,ATF7IP,PIM1,HS2ST1,SMC6,TNPO3,THRAP3,DLEU1,USP37,STIP1,THEM4,CENPJ,IFT80,SLC25A36,XRCC4,MSH3,CDC42EP4,C…	6.EryMeg	Trisomy21vsGATA1s	3133
SENESE_HDAC1_TARGETS_UP	7.08172	5.22718583624493e-47	4.99933414594707e-45	433	KYNU,ABCC4,CD55,BACH1,MAX,MBNL1,MAST4,PTBP3,NEAT1,LNCAROD,YWHAZ,IQGAP1,IGF2BP3,TOP1,CPEB4,CDC42SE2,ACTR2,ZNF644,ATP11A,TMOD3,GPCPD1,PTPN12,DCP2,STRN,TFPI,FCHO2,ZMAT3,USP34,ITPR1,PSME4,PRDM2,TAOK1,TGFBR2,SGPP1,ADAM10,HECTD1,YTHDF3,PLEKHB2,CTNNA1,RAB6A,ATP11B,SCYL2,G3BP2,SLC43A3,AHCTF1,AKR1C1,CHD4,ITGA6,DHX9,GSR,TMEM41A,TFRC,PDE4DIP,MAP3K2,PLEKHM1,RRN3,EPG5,GLYR1,PPTC7,ATP13A3,SQSTM1,PTPN11,NFE2L2,…	7.EMPP	Trisomy21vsGATA1s	3258
GARY_CD5_TARGETS_UP	7.07896	1e-50	1.165e-48	455	TGFB1,IL2RG,TLN1,ZFP36L1,GNAI2,PFKL,TNFSF9,SLC2A3,PTPN6,NFKBIA,NEAT1,CD55,PPP1R18,CAPNS1,SQSTM1,CD83,STAT1,JUNB,CALR,PIM2,SEPTIN6,MALAT1,SPI1,RELB,IRF9,KDM6B,MYADM,NR1H2,MIDN,BNIP3L,WASF2,IRF2BP2,SHKBP1,RALA,ARHGDIA,ZFP36L2,HMG20B,PKN1,DDX17,CD70,MBP,NBEAL2,PBXIP1,SESTD1,AKAP13,ICAM1,PTOV1,TNFAIP3,RAB11B,STAT5B,NFKB2,TTC3,MKRN1,SIPA1,PRRC2A,PDK1,TPP1,NCOA3,MGAT4B,SF3A2,PGK1,IRF1,MYLIP,BTG2,ALDH16…	5.EryP	NormalvsGATA1s	3635
WAKABAYASHI_ADIPOGENESIS_PPARG_RXRA_BOUND_8D	7.06804	1e-50	1.1134328358209e-48	830	DLC1,ABCC4,ARMC8,CD36,BMP2K,ASAH1,ZMYND8,MBNL1,LUZP1,FADS2,CTNNBL1,HSPA5,SMYD3,LMNA,LTC4S,NID1,STAT1,CST3,LMBRD1,NET1,TXNIP,ACSL3,LNPEP,PNPLA8,QKI,ZEB2,NIPBL,FNIP1,CDK13,ADIPOR2,MYCBP2,TIPARP,TANK,HSP90B1,ABI1,RPN1,NDEL1,STAG1,HIPK1,FNDC3B,USP6NL,CD151,TMEM131,DYNLRB1,KIAA0232,CREB3L2,ZCCHC7,LMBR1,EFR3A,EIF4G3,ZNF326,REEP5,CBLB,STK3,OXSR1,MPP7,PCCA,TBXAS1,RANBP2,GIGYF2,SH3GLB1,MKLN1,G3BP2,IFRD1,A…	7.EMPP	Trisomy21vsGATA1s	3257
DODD_NASOPHARYNGEAL_CARCINOMA_UP	7.06764	1e-50	1.1134328358209e-48	1357	U2AF1,DCAF6,RSRC1,TYROBP,ATP2C1,SMG1,FCGR2A,FAM171A1,PPP3R1,NID1,STAT1,NPL,TCF12,SLC7A5,QKI,DNAJB6,MAP2K4,GLS,ADIPOR2,AGPAT3,FRRS1,DENND1A,TANK,PTEN,HSP90B1,CNOT2,ARID2,USP14,TRIM24,FNDC3B,MTR,E2F3,VEZT,SLC44A1,CAMTA1,ASAP1,LMBR1,CLASP1,STK3,CKAP5,FCER1G,ETV6,RANBP2,SCYL2,WRN,TRPM7,TDG,MKLN1,CEP192,IFRD1,MED21,AHCTF1,OTULIN,SENP6,KIF20B,LUC7L2,FXN,EDRF1,FARP2,CPSF6,TFRC,MPZL1,FBH1,CCDC14,RIF1,FKB…	7.EMPP	Trisomy21vsGATA1s	3256
REACTOME_POST_TRANSLATIONAL_PROTEIN_MODIFICATION	7.06574	1e-50	1.69568181818182e-48	1370	HERC2,PRKN,ANK1,TGFB1,STAM,APLP2,NR4A2,CD55,ZBTB16,TRAPPC10,ANKRD9,TIMP1,USP15,TUBA1C,CTSA,ADAMTS3,LTBP1,TPST2,RAB10,PDIA3,DNAJC3,NPL,ATXN7,RAB2A,CST3,PROS1,NCOA1,SP100,GALNT10,TFG,SPTA1,LGALS1,RPN1,FUT8,DCAF6,USP16,APC,USP25,KLHL2,VCP,SMAD3,MRTFA,DDX17,AGTPBP1,SENP5,RIPK1,PPP6R1,UGGT1,TGFBR2,CTSZ,IGFBP7,CTSC,B4GALT1,STAM2,TOP1,TUBB1,CDKN2A,TUBB4B,USP47,DCUN1D1,UBE2E1,NCOA2,CSF1,NAPG,NUS1,TRAPPC1…	7.EMPP	NormalvsGATA1s	3123
ACEVEDO_LIVER_TUMOR_VS_NORMAL_ADJACENT_TISSUE_UP	7.04975	1e-50	1.24366666666667e-48	832	TUBA1C,TAGLN2,PFN1,LMNA,CD9,LAMTOR1,LYZ,KIFAP3,DAD1,S100A10,DYNLRB1,HIGD1A,PTTG1IP,ATP6V0E1,ROCK2,PPP1CA,CCL5,NAA10,JARID2,CORO1B,UBE2Q1,ZMAT3,PTBP3,ARF3,PIR,PSMD6,VPS29,ARHGAP12,TP53BP2,VPS25,HLA-C,SERPINH1,TSPAN14,TOM1L1,ATP6V0C,PECAM1,GNG5,ELOVL6,NRDC,SDF2L1,DNAJB11,RSRC1,CPQ,FAM20B,PTPN12,CDK2AP2,PPP2R5A,SELENOT,RPL36AL,HLA-B,PHACTR4,COPE,GRN,TFIP11,FKBP5,GTF2IRD2B,ANKMY2,AP3B1,WIPI1,SNAP29,G…	6.EryMeg	Trisomy21vsGATA1s	3132
REACTOME_INFECTIOUS_DISEASE	7.04844	1e-50	1.1134328358209e-48	993	STAM,TGFB1,LYN,PRKAR2B,MED13L,YES1,ITGB1,ROCK2,CLTC,RCOR1,SMAD3,DNAJC3,YWHAZ,CTNNB1,CD4,ACTR3,FCGR2A,SOS1,FUT8,NCOR1,STAT1,ACTR2,GPC4,TXNIP,MAN2A1,ITCH,AP1G1,TUBA1C,MAP2K4,ITPR2,RUNX1,EP300,MYH9,ABI1,RPN1,JAK2,CYBA,PSMD1,POLR2A,CTNND1,JAK1,RIPK1,RNGTT,AP2B1,ZDHHC20,ITPR1,GNG2,PSME4,MAPK1,CTDP1,IGF1R,TXNRD1,WASL,UBAP1,ZDHHC2,FYN,UVRAG,PHF21A,STAM2,CD9,MED13,PPP1CB,CDK19,CUL3,GATAD2A,GRB2,VPS37A,TU…	7.EMPP	Trisomy21vsGATA1s	3255
HAMAI_APOPTOSIS_VIA_TRAIL_UP	7.04727	1e-50	8.77529411764706e-49	646	ITM2A,ASAH1,CD55,CELF2,NID1,HSP90B1,DNAJB11,PJA2,DNAJC3,FYB1,RABGAP1L,AGTPBP1,STAT1,TAOK3,TAX1BP1,RPS6KC1,OSBPL8,AP3B1,ITGB1,PTEN,CCNL1,PIK3CA,BNIP3L,PDCD10,PIR,MYEF2,SETX,ARID4B,BAZ2B,CTSZ,ITSN2,CEP170,AP1S2,TRIM24,ITFG1,CREB1,TUT7,ZNF644,SKAP2,MAP3K2,CHD1,DCUN1D1,CCDC91,FER,APC,MAPK6,SON,CENPC,SYNE2,RLF,ATF7IP,MYCBP2,GNPTAB,GGNBP2,CCDC88A,FXR1,RDX,BLZF1,NIPBL,GPBP1,USP47,WWP1,CEP70,OPA1,GOLGB1,…	5.EryP	Trisomy21vsGATA1s	3711
REACTOME_ASPARAGINE_N_LINKED_GLYCOSYLATION	7.038	1.07728847983893e-45	1.08631441034569e-43	297	ANK1,TUBA1C,CTSA,NPL,DAD1,CD55,TRAPPC1,SPTA1,RPN1,CAPZB,TUBB1,FUT8,CTSZ,ARF3,CMAS,FUCA1,MGAT4B,PPP6R1,PDIA3,VCP,TRAPPC10,UBC,SPTB,TUBB2A,NAPA,MPDU1,COPE,DYNC1I2,UGGT1,RAB1B,RENBP,CAPZA1,CAPZA2,TUBB4B,TFG,SEL1L,TMED7,NGLY1,STX5,ARF4,GOLGB1,DCTN1,B4GALT1,PPP6R3,MAN2A1,SCFD1,DYNC1I1,DYNC1LI2,DPM2,DERL2,NUS1,CTSC,MGAT3,COG4,DCTN2,NSF,TRAPPC2,ARFGAP1,GBF1,ST3GAL2,ARCN1,MAGT1,ST3GAL3,HK1,LMAN2,TRAPPC3,…	6.EryMeg	Trisomy21vsGATA1s	3131
MILI_PSEUDOPODIA_CHEMOTAXIS_DN	7.0378	4.35649099356792e-49	6.91569772404473e-47	453	VCL,APLP2,LRP12,SGMS1,FOSB,MAST4,ITGB1,ZMYND8,GLG1,CTNNB1,TXNIP,FAM171A1,PDIA3,TLN1,HSPA5,LMBRD1,PFKL,NEAT1,SPNS1,RPN1,PTPRA,PTGS1,TNFSF9,VCP,PSAP,SPPL2A,CD9,AREL1,SON,ADD1,SNX29,NDEL1,CLCN4,SNX14,SLC10A3,MPZL1,ESYT1,WDR26,THRAP3,WWP2,IGF1R,MMP14,SLC19A2,MAN2B1,SQSTM1,DAG1,USP14,MALAT1,BIRC2,CTNNA1,SCFD1,ANKRD11,ZMIZ1,ADORA2B,FAM53B,GRN,ZFP36,CCNY,PPIL2,PSMD1,GGNBP2,THBS1,CDIP1,KDM6B,HSD17B12,NED…	7.EMPP	NormalvsGATA1s	3122
RODRIGUES_THYROID_CARCINOMA_ANAPLASTIC_UP	7.03638	1e-50	1.24366666666667e-48	692	TGFB1,CYTOR,PLP2,FLNA,IQGAP1,ITGB1,YWHAZ,CTSA,IL1RAP,RHOBTB3,VPS50,S100A10,ACTR2,SLC16A3,EIF4G2,TNFSF9,CDKN2A,ADRM1,DCBLD2,PTBP3,KMT2C,ELF4,LPP,GALE,TMOD3,SEMA3C,KIF2A,JPT1,SERPINH1,USP15,ELOVL6,RSRC1,STRN,AMMECR1,NMI,PTPN12,SP100,CDYL,LNPEP,HECTD1,PAK2,FGFR1OP2,ZBTB38,LZIC,APC,STK4,IGF2BP3,CORO1C,ATG5,EIF4G1,BBC3,BTAF1,SLC7A5,MLF1,BLZF1,GAD1,ITCH,OGFRL1,CD58,SEL1L,CKAP5,RECQL,TP53RK,STAM2,TOP1,M…	6.EryMeg	Trisomy21vsGATA1s	3130
STARK_PREFRONTAL_CORTEX_22Q11_DELETION_DN	7.03478	1.7071304943605e-43	1.24888311263903e-41	511	RPL8,ATP5PO,RPL18,DIPK1B,LAMTOR1,RPL22L1,SLC25A5,AKR1A1,TPI1,EIF3F,MZT2A,EIF3K,COMT,ATP5PF,NME2,NR1H2,MDH2,NACA,PRELID1,EIF3L,MRPL57,BCAP31,EIF1,MRPL3,NDUFA11,ELP5,GPI,C1QBP,NME1,CLNS1A,EIF6,SNRPD2,PPP1CA,NDUFB2,B4GALT3,TST,NIPSNAP1,MRPS12,MICOS13,DDX56,AP2M1,CYC1,SCAND1,ABT1,PDCD6,S100A6,UFC1,SMARCB1,MPC2,FMC1,NDUFS3,ST13,LRPAP1,SEC61B,NENF,RRP7A,MRPL28,NDUFA8,NAA38,TXN,KXD1,VPS4A,C4orf3,NDUFAF3…	5.EryP	NormalvsTrisomy21	2871
MILI_PSEUDOPODIA_CHEMOTAXIS_DN	7.03407	4.97331084899475e-46	4.52449986993912e-44	453	VCL,APLP2,SGMS1,LRP12,ZMYND8,MAST4,ITGB1,MALAT1,NEAT1,TLN1,HSPA5,CTNNB1,GLG1,FAM171A1,PDIA3,LMBRD1,WDR26,TXNIP,AREL1,KLF6,SPNS1,SCFD1,SPPL2A,PTGS1,RPN1,USP14,PTPRA,PSMD1,NDEL1,TNFSF9,SNX14,ANKRD11,OSBPL9,SNX29,IGF1R,ASAP1,CTNNA1,CD9,EIF2AK3,CLCN4,PPP6R3,DAG1,FOSB,DIDO1,CCNT2,PAN3,AHCTF1,MACO1,MED15,GGNBP2,RPS10,MPZL1,ESYT1,CUX1,MMP14,B3GNT2,SQSTM1,CCNY,OGT,DIAPH1,PSAP,ADD1,GSK3B,HTT,SLC10A3,NEDD4…	7.EMPP	Trisomy21vsGATA1s	3254
ENK_UV_RESPONSE_KERATINOCYTE_DN	7.02912	1e-50	8.77529411764706e-49	473	SLC2A3,ACTR2,MACF1,YES1,KIFAP3,ATP2C1,DHRS3,NCOA3,GNAQ,MBNL1,ARHGEF7,CD46,DDX17,BNIP3L,SP100,TGFBR2,CLTC,G3BP2,LAMP2,FOS,MCL1,FKBP5,ITSN2,NPEPPS,TRIP12,PTP4A2,KLF7,ATP6V1A,MKRN1,TPST2,AUH,CREB1,CTNNA1,PRKAR1A,MARK3,KRAS,RANBP2,NPTN,MAP4,ZMYND8,SCFD1,ZMYM2,CNOT2,IGF2BP3,PTPN1,CUX1,SIAH1,RDX,USP14,ROCK2,FNTB,GSK3B,COG5,ITSN1,OGT,SEC24B,STXBP3,DDX3Y,STK3,KLF9,CD2AP,MAP3K5,TLK2,ATP2A2,CCND2,CLIP1,PUM…	5.EryP	Trisomy21vsGATA1s	3710
MARTINEZ_RESPONSE_TO_TRABECTEDIN_DN	7.02406	4.83870009435428e-44	4.19729101207941e-42	265	CDC42BPA,ZMYND8,RCOR1,LUZP1,EPB41,TP53INP1,BIRC6,RAB2A,BTAF1,TOP1,PJA2,JMJD1C,NET1,ACSL3,MYCBP2,USP8,CORO1C,FAF1,ELOVL6,RBM25,RIPK1,TRIM24,OSBPL9,ARFGEF2,TXNRD1,ATG5,TSPAN14,FRYL,SRRM2,FYN,EML4,RAB6A,BLZF1,TDG,USP3,FNDC3A,STK17A,EPS15,RAB1A,SRPK2,HERC4,SQSTM1,OGT,ZMYM2,IMMP2L,PHF6,SMARCA5,PKN2,EP400,B4GALT5,PRIM2,TBK1,TBL1XR1,PSMD14,MTCL1,STK17B,MAPK14,CSNK2A1,NCOA6,JAG1,SIRT1,PRKACB,ARFGAP1,LRRC…	7.EMPP	Trisomy21vsGATA1s	3253
REACTOME_INNATE_IMMUNE_SYSTEM	7.02341	1e-50	1.165e-48	1031	LRRC7,FCER1A,LAT,CYBA,ASAH1,TYROBP,S100A11,GSTP1,CD63,TXNIP,HLA-B,PFKL,NCF4,CAPN1,B2M,LYZ,SLC2A3,PTPN6,CD4,CST3,DNM3,PSAP,VCL,FOS,CTSA,SERPING1,BIN2,ACTR2,NFKBIA,CD55,ARPC1B,CYB5R3,LAMTOR1,TMBIM1,IQGAP1,MAN2B1,CFP,MAP3K8,TRAPPC1,VCP,ARPC2,ATP6V0C,ARPC3,CFH,FCGR2A,HLA-C,LAMP1,CTSZ,FCER1G,ALDOA,CTSH,MEF2C,RAB5C,RELB,ATP6V0E1,LAT2,DNAJC3,ADAM8,YES1,CD33,TUBB4B,HSP90B1,NCKAP1L,CTSD,GRN,CD68,GMFG,TSPA…	5.EryP	NormalvsGATA1s	3634
REACTOME_INFECTIOUS_DISEASE	7.01553	1e-50	8.77529411764706e-49	993	TGFB1,CYBA,GPC4,STAM,CD4,ACTR2,B2M,YES1,MED13L,HLA-A,LYN,SMAD3,HLA-B,DNAJC3,JAK1,STAT1,YWHAZ,HLA-C,TXNIP,PPP1CB,ARPC2,CD9,TAB2,GNAI2,RCOR1,CDC42,PTPN6,RPS10,ITGB1,GNAS,CTNNB1,TUBA1C,ITCH,MYH9,WASF2,NFKBIA,ARIH1,UBC,FCGR2A,CALR,ABI1,CTNND1,CLTC,G3BP2,NCKAP1L,ARPC1B,ARID4B,CHMP4B,VCP,HSPG2,POLR2A,UVRAG,CUL3,ELMO1,ARPC3,NFKB1,TXNRD1,AP1G1,UBAP1,SERPINE1,AP1S2,RPN1,SYK,TRAF6,NCOR1,FURIN,DOCK2,GNG2,EP…	5.EryP	Trisomy21vsGATA1s	3709
KOINUMA_TARGETS_OF_SMAD2_OR_SMAD3	7.01271	1e-50	1.24366666666667e-48	813	PDLIM1,PLP2,VCL,ACTN1,TLN1,ZFP36L1,MBOAT2,TAGLN2,PFN1,STON2,RNH1,ITGB1,YWHAZ,RHOC,DHRS3,SGMS1,S100A10,CD55,AKR1C1,KLF6,MALAT1,MAST4,BACH1,SULT1A3,HSPA5,MICALL2,SESTD1,SPECC1,TSPAN15,CXXC5,TMBIM1,ZMYND8,SMAD3,CLTC,PTBP3,KMT2C,ARHGDIB,CLIP2,TMOD3,ABHD2,MBOAT1,SUSD1,MYH9,NET1,GNG5,ARHGAP21,C15orf39,THBS1,NFIL3,OSBPL3,ARL4A,KLF10,UBC,GSE1,STK10,ANXA3,TUBB2A,NQO2,WASF2,MORF4L1,CAPNS1,AP1S2,IKBKG,TIPAR…	6.EryMeg	Trisomy21vsGATA1s	3129
MILI_PSEUDOPODIA_HAPTOTAXIS_DN	7.01151	1e-50	1.73279069767442e-48	674	TGFB1,FLNA,APLP2,CST3,TLN1,VCL,CD151,PTTG1IP,SPNS1,CD9,RPS10,LY6E,NID1,PTGS1,CTSZ,HLA-B,RPN1,IQGAP1,LTBP1,ITGB1,TMBIM6,VCP,RNASEK,SLC22A23,TNFSF9,DAD1,ZMYND8,LRP10,GLG1,LRP12,CMTM6,TSPAN14,ZFP36,CDIP1,ESYT1,SQSTM1,NCAM1,GRN,SCAMP2,MFSD1,THBS1,SERPINH1,SGMS1,HSPA5,OBSL1,ORAI1,SON,PDIA3,CERS2,BCAP31,SEC11A,M6PR,SLC10A3,SFT2D1,DDOST,KANTR,SLC43A3,HSD17B12,FAM171A1,RTN3,CSF1,FBXO34,YIPF3,DCBLD2,MFSD1…	6.EryMeg	NormalvsGATA1s	3182
MULLIGHAN_MLL_SIGNATURE_1_UP	7.00983	5.54928698091508e-49	8.10739946956828e-47	378	FLNA,OAZ1,FCGR2A,S100A4,CYBA,CTSA,ATP6V0E1,CCND3,LGALS1,S100A6,ARPC1B,IGFBP7,ARPC2,SLC16A3,LAT2,RNF167,FES,ACTR2,PECAM1,ABHD17A,PKM,C15orf39,MICAL1,GLG1,CALM1,RAC2,EHBP1L1,SYK,POLD4,NINJ2,TRAPPC10,FUCA1,GRN,MFSD1,PPIF,PRKCD,LAMP1,LAPTM5,APOBR,TADA3,ARPC4,ELF4,ARHGAP1,SELPLG,MYO1F,M6PR,DNM2,SLA,SLC43A3,KIAA0930,C11orf21,UQCRC1,SEPHS2,ARL6IP5,SCPEP1,KRI1,CHD3,CLTB,TRAF3IP3,HCLS1,HSPA1A,P4HB,HDAC6,S…	6.EryMeg	NormalvsGATA1s	3181
NUYTTEN_NIPP1_TARGETS_DN	6.99456	1e-50	1.1134328358209e-48	825	DLC1,VCL,MBOAT2,TGFB1,BMP2K,DHRS3,SPTLC2,DIPK2A,FER,RAB10,SLC40A1,ROCK2,PDCD10,MAP4K4,RANBP9,NCOA1,LAMA5,EIF4G2,GTDC1,GALNT10,INF2,PDZD8,PJA2,LPP,OSBPL3,ERC1,TXNIP,ACSL3,MAN2A1,PACSIN2,PLP2,SLMAP,XK,PRMT2,ORC4,CCDC91,DCP2,MAP2K4,RUNX1,NUDT4,BMPR2,ATP6V1A,ANKRD17,PREX1,AP2B1,AMMECR1,HIPK1,CAPZA1,B4GALT1,S100A10,SLC35F5,SGPP1,SLC44A1,ARNT,SESN1,ASAP1,LMBR1,HUWE1,PPP1CB,ZNF326,SLC12A6,TMEM245,CUL3,T…	7.EMPP	Trisomy21vsGATA1s	3252
HALLMARK_MYC_TARGETS_V1	6.98979	2.68252699398282e-39	1.66808470242498e-37	195	RPS3,RACK1,RPLP0,IMPDH2,RPL6,EEF1B2,RPS5,RPS2,RPL18,EIF4A1,TUFM,MYC,TRIM28,PABPC1,PHB2,CCT7,RUVBL2,EIF1AX,SRM,LSM7,RAN,EIF3D,PCBP1,CDK4,SF3A1,LSM2,HSP90AB1,NPM1,APEX1,ILF2,CNBP,ODC1,C1QBP,NME1,CLNS1A,MRPS18B,SRSF7,PSMD8,SNRPD2,COX5A,HDDC2,RNPS1,RSL1D1,NHP2,POLD2,CYC1,PGK1,XRCC6,AIMP2,PWP1,PSMD3,NOP56,PSMA7,CTPS1,NDUFAB1,PSMD7,MRPL9,BUB3,FBL,SERBP1,EIF3B,CCT4,DDX18,NOP16,SNRPA,ABCE1,CCT3,VDAC1,LDH…	5.EryP	NormalvsTrisomy21	2870
BLALOCK_ALZHEIMERS_DISEASE_DN	6.98254	1e-50	1.24366666666667e-48	1223	APLP2,ASAH1,HERC2,ACTN1,B2M,MEF2C,MYL12A,PIP5K1B,ABCC4,FCER1G,STK24,SNX3,DMTN,YWHAZ,PRKAR2B,KIFAP3,RSU1,XK,DYNLRB1,HIGD1A,ACTR2,STAM,NDFIP1,PTH2R,ARPC3,ROCK2,GNAS,PRKCB,GLUL,ATP5F1E,TMBIM6,HSPA5,LRP12,CDKN2D,CALM1,LXN,PPP1R12A,CLTC,NOS1AP,ARPC5,ZMAT3,ARPC2,SERPINI1,STAT1,ARF3,GABBR1,CAP1,RAB11A,PRKAR1A,TMEM50A,SNRPN,PSMD6,RCOR1,DCAF6,RANBP9,MEG3,EIF2AK1,KIF2A,FUCA1,RNASET2,ATP6V1A,YPEL5,BNIP3,SNC…	6.EryMeg	Trisomy21vsGATA1s	3128
JOHNSTONE_PARVB_TARGETS_3_DN	6.97437	1e-50	8.77529411764706e-49	847	DNAJB6,ACTN1,YES1,SGMS1,PTBP3,DNAJC3,RABGAP1L,ATP2C1,ELL2,CDC42SE2,PPP1CB,TAX1BP1,CDC42SE1,CCND3,SLC7A5,ATP9B,MBNL1,PTEN,ANKRD28,CTNNB1,ZNF273,GLS,SEC14L1,G3BP2,ACAP2,PIK3CB,LAMP2,QKI,FKBP5,RAPGEF2,CUL3,PLEKHB2,AP1G1,TRA2A,SERTAD2,CKAP2,AP1S2,UBA6,RSRC1,MORC3,TMED7,MAP1LC3B,TIPARP,MAP3K2,CPSF6,FBXW7,DCUN1D1,MAPK6,BMPR2,HIGD1A,BLZF1,FOXN2,TCF12,MLF1,GNB4,CEP70,OPA1,ZNF652,FAM13B,TNRC6B,PRRC2C,PPM1…	5.EryP	Trisomy21vsGATA1s	3708
HAMAI_APOPTOSIS_VIA_TRAIL_UP	6.96879	2.15537825776526e-50	2.59410202571683e-48	646	ASAH1,ITM2A,FYB1,NID1,ITGB1,RABGAP1L,PDCD10,CD55,PROS1,SPECC1,CDC42BPA,CTSZ,ITGA6,STAT1,PIR,PJA2,FER,DNAJC3,SEMA3C,CROT,TUT7,MID1,RPS6KC1,DAAM1,DNAJB11,ARHGAP10,RABEP1,NMI,AP1S2,SKAP2,AGTPBP1,GNPTAB,TRIM24,HECTD1,TCIRG1,BCAP29,RDX,ZBTB38,SYNE2,APC,AP3B1,SETX,STX7,EIF3J,USP8,TOP2B,BLZF1,NDUFS4,TAX1BP1,SLC16A7,MYEF2,RECQL,WDR11,STXBP3,GOLGB1,CCDC91,SCP2,HSP90B1,NT5C,POLK,LINC00467,ITFG1,MTR,PIK3CA,…	6.EryMeg	Trisomy21vsGATA1s	3127
ZHENG_BOUND_BY_FOXP3	6.96551	2.09040580409528e-50	1.81306242938915e-48	486	KLF6,TMSB4X,MT-ATP6,MIR4435-2HG,NR4A2,TP53INP1,PTPRC,CHD7,STK24,CELF2,LDLRAD4,MACF1,SGMS1,SMAD3,JARID2,PTBP3,ELF1,FYB1,RABGAP1L,EPB41,JAK1,CDC42SE2,ITM2B,TPP2,PTGER4,NCOA3,OSBPL8,MBNL1,ANKRD28,ANKRD11,KLF2,ZFAND6,UBE2H,GTDC1,JMJD1C,ATP2B1,HIF1A,MAP3K8,C21orf91,SESN1,SP100,TGFBR2,STK17B,MRTFA,RAPGEF2,STAT5B,USP6NL,TOX,ELMO1,ZNF217,TEC,STK10,ARL4A,GNG2,CHD2,ZBTB20,TENT5C,AKAP13,PRKCQ,ZC3HAV1,NUS1,R…	5.EryP	Trisomy21vsGATA1s	3707
GOBERT_OLIGODENDROCYTE_DIFFERENTIATION_DN	6.96421	1e-50	8.77529411764706e-49	1065	DBN1,SPTLC2,MALAT1,RHOBTB3,SLC2A3,TP53INP1,PLXDC2,RELN,TNFSF9,MBOAT2,DNM3,EMP3,ELF1,RABGAP1L,VPS50,STAT1,TPP2,PDGFC,TXNIP,CD9,USP20,DIPK2A,ANKRD28,HECTD4,HDAC5,PDLIM7,GADD45B,UBE2H,RASGEF1B,C21orf91,BNIP3L,PDCD10,CPEB2,SLC22A23,ABI1,SCAF4,CYLD,PNRC1,FOS,LMBRD1,AGPAT4,QKI,ARPC1B,EZR,ALDH3B1,USP6NL,BAZ2B,PRNP,TMBIM1,RBM25,KDM6A,MBOAT1,TRA2A,SMURF1,MKRN1,AP1S2,MAN2B1,ARL4A,NCOR1,STRN,PTPRCAP,TET2,MA…	5.EryP	Trisomy21vsGATA1s	3706
BENPORATH_NANOG_TARGETS	6.96071	1e-50	8.77529411764706e-49	958	APLP2,ASAH1,HSPA5,GPC4,ZFP36L1,MBOAT2,CELF2,B2M,STXBP2,SGMS1,SMAD3,S100A11,JARID2,NFAT5,INF2,ELL2,DHRS3,SEPTIN6,SLC7A5,AP3B1,ITGB1,SPRY1,ABHD2,SPAG9,ZFAND6,DDX17,F11R,RNF24,ARIH1,UBC,CALR,SCAF4,EIF4G2,CYLD,RBM39,PIM2,MYEF2,SGK3,EXOC4,ARF3,KDM2A,PRNP,KLF7,ATP6V1A,ZNF217,NT5C2,TXNRD1,AP1G1,ODF2L,MKRN1,AP1S2,TRIM24,NCOR1,OBSL1,TALDO1,STRN,SF3B1,CHD2,MAP1LC3B,ADAR,GLG1,E2F3,CLIC1,EIF2AK3,ANXA1,SON,MO…	5.EryP	Trisomy21vsGATA1s	3705
MULLIGHAN_MLL_SIGNATURE_2_UP	6.95192	4.30151747720212e-50	4.85941125909378e-48	412	KYNU,APOC2,CYBA,FLNA,C15orf39,CTSA,ACTR2,CCND3,MYO1F,OAZ1,IGFBP7,S100A4,IQGAP1,TRAPPC10,ARPC2,LAPTM5,FES,LAMP1,SPI1,LGALS1,ATP6V0E1,ELF4,LAT2,GRN,ABHD17A,EHBP1L1,ALDH3B1,GLG1,APBB1IP,P4HB,RNF167,LRP10,PKM,AP1S2,RAC2,HCLS1,SLC16A3,SYK,MFSD1,MALT1,RNPEPL1,C11orf21,APOBR,ABHD2,PLIN3,OSBPL8,SIPA1,PRKCD,TPP1,CHD3,TGOLN2,SERF2,PSEN1,MICAL1,LNPEP,PECAM1,M6PR,ECHDC2,HSPA1A,AKR7A2,PTK2B,ARPC4,RASSF2,HDAC6…	5.EryP	NormalvsGATA1s	3633
REACTOME_SIGNALING_BY_RHO_GTPASES_MIRO_GTPASES_AND_RHOBTB3	6.94653	1.34263712579741e-49	1.54134742041542e-47	652	DLC1,ARHGAP6,ACTN1,FLNA,TUBA1C,PFN1,ACTB,LAMTOR1,MYL6,IQGAP1,ITGB1,CYBA,YWHAZ,RHOC,DBN1,RHOBTB3,ACTR2,STAM,ARHGAP18,ARPC3,ROCK2,PRKCB,FLOT2,NCF4,TPM3,CALM1,CAPZB,ARPC1B,FNBP1L,RHOA,PPP1R12A,TUBB1,CDC42BPA,CLTC,PLEKHG1,ARPC5,ARPC2,BTK,ARHGDIB,PRKCD,STOM,TMOD3,ARPC4,RHOB,CSK,MYH9,ARHGAP12,NET1,KIF2A,ESYT1,CTNNA1,CDC42,ARHGAP21,VCP,PREX1,DAAM1,ACTR3,STK10,YWHAB,ARHGAP10,TUBB2A,YWHAH,ARHGAP1,WASF2,RA…	6.EryMeg	Trisomy21vsGATA1s	3126
NUYTTEN_EZH2_TARGETS_UP	6.94299	1e-50	1.1134328358209e-48	999	ANK1,MEIS2,GNAQ,ARMC8,APLP2,SGMS1,JARID2,FYB1,ZFP36L1,BACH1,MAX,SLC9A9,PIK3CB,TNIK,USP15,CNRIP1,YWHAZ,RPS6KC1,HSPA5,GLG1,SMYD3,ACTR3,NFAT5,NCOA3,FUT8,STAT1,CDC42SE2,PIK3CA,WDR26,PDK1,DCBLD2,TRIM58,TXNIP,ARHGAP21,TP53BP2,PIP4K2A,CPEB2,KDM4C,LNPEP,CAB39,QKI,LCOR,TFG,ZC3HAV1,KLF6,WDR1,WWC2,DNAJB6,ADIPOR2,TMEM117,FCHO2,BMPR2,AGPAT3,ATP6V1A,SP100,TANK,MCU,MORC3,HSP90B1,CORO1C,JAK2,RBM25,JPT1,PTPN1,FND…	7.EMPP	Trisomy21vsGATA1s	3251
BRUINS_UVC_RESPONSE_LATE	6.93229	1e-50	1.24366666666667e-48	1104	STXBP5,TLN1,RUFY1,LRRFIP2,ACTB,NID1,PLXDC2,MYL6,CAPN1,FADS2,KIFAP3,RSU1,PDCD10,CD55,TMBIM6,GPC4,RAB10,DCBLD2,TPM1,PPP1R12A,CITED2,NBAS,SQSTM1,CMAS,SLC44A1,FER,PTP4A2,PRKAR1A,MEG3,RHOB,NUDT4,TALDO1,ATP6V0D1,ATXN7,OSBPL3,KLF10,RSRC1,YWHAB,CPQ,NQO2,RABEP1,HACD4,NMI,EXOC3L4,GPS2,CCND2,RAB2A,MFAP3L,PDIA5,JAK2,ORMDL1,IL15,ROGDI,ZFAND6,STK4,PACSIN2,C11orf98,SNAP29,STAT6,ENO3,ICAM5,GNG11,TSG101,DRAP1,TJP…	6.EryMeg	Trisomy21vsGATA1s	3125
HALLMARK_TNFA_SIGNALING_VIA_NFKB	6.93149	9.14188697585118e-43	6.74870389029172e-41	199	KYNU,PDLIM5,FOSB,NR4A2,ZFP36,TNFSF9,SLC2A3,IER2,ETS2,NR4A1,FOS,NFKBIA,RHOB,STAT5A,SQSTM1,KLF6,GADD45B,KLF10,KLF2,CD83,MAP3K8,DUSP1,JUNB,PTGER4,RELB,TSC22D1,SERPINE1,NFIL3,KDM6B,SMAD3,ATP2B1,SOD2,FOSL1,CSF1,JUN,DUSP2,ABCA1,NR4A3,B4GALT1,BMP2,JAG1,ICAM1,TNFAIP3,MAFF,EGR1,PER1,NFKB2,NFKB1,IRF1,TNIP1,BTG2,BIRC2,MCL1,PPP1R15A,SDC4,NINJ1,PTGS2,EIF1,BTG3,ZC3H12A,TNIP2,IFNGR2,CCL5,BCL6,BIRC3,BCL3,PANX1,T…	5.EryP	NormalvsGATA1s	3632
RHEIN_ALL_GLUCOCORTICOID_THERAPY_DN	6.92974	1.43268991247248e-39	9.05994248039799e-38	361	EGR1,RPLP0,IMPDH2,HSPA8,ENO1,CCT8,TUBA1C,GAPDH,AHCY,TKT,FABP5,ADSL,IGFBP7,RBM8A,TUFM,LAPTM4B,AKR1A1,TPI1,CCT7,ATP5PF,RPL3,PSMG1,TUBA1B,PGD,FOSB,BCAP31,SHMT2,MARCKSL1,CDK4,EID1,MRPL3,HMGA1,TALDO1,STOML2,PRMT1,PDLIM1,LDHB,HSP90AB1,GPI,CITED2,FOS,NPM1,APEX1,CNBP,C1QBP,CD34,NME1,CLNS1A,BHLHE40,CSNK2B,SNRPD2,HDDC2,SDHC,CFAP298,GPX7,UBE2L6,TUBB,PSMB8,RSL1D1,PDCD2,NHP2,SORD,FRMD4B,MPP1,PRDX6,PGK1,PIGP,M…	5.EryP	NormalvsTrisomy21	2869
JIANG_MELANOMA_TRM3_CD8	6.91772	2.52064271130266e-50	4.17362418709247e-48	419	CTSW,IL2RG,PLP2,S100A11,ITM2A,TMSB4X,OAZ1,B2M,ZFP36L1,S100A4,HMGN1,ALDOA,MYL6,CD63,LIMS1,TRAPPC1,ARPC3,PFN1,LY6E,ACTB,LGALS1,SH3BGRL3,CYTOR,CYB5R3,MIR4435-2HG,PPP1CA,CLIC1,ARPC2,IFI27L2,TALDO1,LMNA,HLA-B,IQGAP1,ARPC5,CAPZB,CAP1,RHOA,PKM,CD7,YWHAB,CDKN2A,CTSC,CDK2AP2,HLA-C,GMFG,TPM3,PGAM1,HERPUD1,SOD1,COPE,ATP5PF,LAPTM5,GAPDH,HSPA5,MYL12B,CFL1,PDIA3,SEC11A,STAT1,GNG5,PRDX5,SP100,SLA,FKBP5,GET3,SUB…	6.EryMeg	NormalvsGATA1s	3180
REACTOME_VIRAL_INFECTION_PATHWAYS	6.91502	1e-50	1.24366666666667e-48	801	TGFB1,RPS10,TUBA1C,B2M,CD4,ITGB1,YWHAZ,DAD1,ROCK2,PPP1CA,PTPN6,GPC4,RPN1,TUBB1,FUT8,SMAD3,CLTC,SNRPD3,FYN,BTK,STAT1,JAK1,PSMD6,RCOR1,DNAJC3,MGAT4B,VPS25,HLA-C,PLCG2,SEC11A,RPS27L,VCP,UBC,FNTB,RAB5C,RPS4Y1,YWHAB,MED13L,AP2M1,TUBB2A,YWHAH,NMI,POLR2L,MAP1LC3B,RAC1,AP1S2,G3BP2,IKBKG,SYK,RPL36AL,HLA-B,CHMP4B,GPS2,VPS37A,SERPINE1,FURIN,PAK2,NCOR1,TAF10,DYNC1I2,PPP1CB,JAK2,AP2B1,AP1G1,IFNAR1,TSG101,NEDD…	6.EryMeg	Trisomy21vsGATA1s	3124
GRAESSMANN_RESPONSE_TO_MC_AND_DOXORUBICIN_DN	6.907	1e-50	1.1134328358209e-48	758	FER,YES1,PTBP3,ZFAND3,YWHAZ,VTI1A,NUMB,ERC1,ZNF644,FAR1,TXNIP,AP1G1,PLP2,FOXN2,PRMT2,ZEB2,KLF6,XPR1,RUNX1,CNOT2,SLC39A11,USP34,DBN1,RIPK1,MSN,ZNF292,CDC73,STAT5B,TAOK1,HPS1,OSBPL9,RHBDD1,FOXJ3,CD2AP,GRTP1,PHF21A,STAM2,LMBR1,CDKAL1,ANKRD28,STK3,POU2F1,NORAD,CHD4,DHX9,LUC7L2,FXN,GSR,DPH6,MSH3,TFRC,XPO4,HERC4,CCL5,OGT,ATE1,DCAF8,ADAT2,IBTK,EXOC6,TRAF6,SPEN,ARHGAP5,RBM39,ACIN1,SREK1,ATF6,PIK3C3,DCTN4…	7.EMPP	Trisomy21vsGATA1s	3250
YAGI_AML_FAB_MARKERS	6.90562	1.86771189461205e-39	1.83355242706586e-37	193	RHAG,ITGA2B,DLC1,MYO16,LDLRAD4,GP9,VCL,IL2RG,TRPC6,ELL2,CTSW,NR4A2,MAX,ZBTB16,CFH,KEL,GP1BB,CDC42BPA,MAST4,GABRE,ZMYND8,ADAMTS3,RYR3,TPST2,LAMA5,PDCD10,PROS1,CD164,PIM2,NET1,LGALS1,S100A10,ITGA6,ELOVL6,GJA4,FAM20B,CD68,NCAM1,CLCN4,GP1BA,RUNX1T1,ULK2,AHNAK,USP8,TXNRD1,AKR1C1,SERPINH1,PIR,CFP,SERPINI1,ITGB3,TFDP2,CTR9,TCIRG1,SNTA1,MED21,ANXA2,CD58,TBPL1,ACO1,TPM1,IL10RB,ORAI2,GAD1,PCCB,STAT4,TOM1L1…	7.EMPP	NormalvsGATA1s	3121
GOBERT_OLIGODENDROCYTE_DIFFERENTIATION_DN	6.90179	1e-50	1.1134328358209e-48	1065	DNM3,PLXDC2,SLC2A3,RABGAP1L,MBOAT2,VPS50,MAP3K5,ELF1,SPTLC2,DIPK2A,ZMYND8,MALAT1,RHOBTB3,PDCD10,SLC22A23,CNRIP1,PLEKHG1,PDGFC,TP53INP1,SPECC1,TET2,LTBP1,PRKCQ,NCOR1,STAT1,LMBRD1,PROS1,PDK1,KDM6A,TXNIP,SCAF4,CPEB2,TCF12,TBC1D23,ERBIN,LRRC8B,TPP2,C21orf91,HECTD4,QKI,ZEB2,WDR1,EMP3,MBOAT1,BCAS3,MAP2K4,ITPR2,STRN,GNPTAB,LCORL,ABI1,CORO1C,SMURF1,KANSL1,JAK2,NOL4L,TNFSF9,DBN1,TANC2,RBM25,RICTOR,TBC1D22…	7.EMPP	Trisomy21vsGATA1s	3249
SCHAEFFER_PROSTATE_DEVELOPMENT_6HR_DN	6.89207	1.36657376185301e-47	1.07297617785912e-45	449	COL23A1,NR4A2,MBOAT2,AUTS2,PSAP,HSP90B1,DNAJB11,DHRS3,TPM3,KMT2C,RHOB,TAX1BP1,GNAI2,RCOR1,AHNAK,ITGB1,LPP,WASF2,DDX6,ATAD2B,CALR,CLTC,SDF2L1,ARF3,BZW1,BAZ2B,IRF2BP2,KDM6B,NUFIP2,SERTAD2,RSRC1,NCOR1,FURIN,TET2,ZNF644,KRAS,GRN,CHD1,ZMYND8,CEMIP2,MACO1,MORF4L1,HMG20B,TCF3,RFX7,KBTBD2,TNRC6B,PRRC2C,SENP2,GPD2,PPP1CA,PFN1,ZNF664,CD2AP,KANSL1,NREP,CHD4,WAC,CSNK1A1,ECD,SMG6,LACTB,DCTN4,ZNF410,SPPL3,STRN…	5.EryP	Trisomy21vsGATA1s	3704
THEILGAARD_NEUTROPHIL_AT_SKIN_WOUND_DN	6.88829	4.99084696817167e-43	3.83626340151423e-41	226	TGFB1,MEIS2,NCOA4,GNAI2,NCF4,ACTN1,PRKCB,PRMT2,ARPC1B,OAZ1,CBFA2T3,STK24,GNAS,IQGAP1,CITED2,ARPC3,TSC22D3,TPST2,FLOT2,JAK1,CELF2,PPP1CA,ANXA11,ARHGDIB,CDKN2D,STAT6,INPP5D,PRKAR1A,ARHGAP4,MAPKAPK3,ADGRE5,CAPZB,EIF4G2,ZFP36L2,PHKB,TST,HCLS1,ARHGEF1,HDAC5,TAOK3,SEC14L1,ZNF217,RIPK1,TWF2,RALY,ICAM3,RGS19,DOCK2,NCOA1,MYO9B,PDE3B,NFE2,RASGRP2,FLII,GRK2,SELPLG,CORO1A,GNAQ,HNRNPUL1,ARHGAP1,PPP1R12A,SLC31…	5.EryP	NormalvsGATA1s	3631
CASORELLI_ACUTE_PROMYELOCYTIC_LEUKEMIA_DN	6.88819	4.45184123068987e-49	4.88524106814821e-47	660	GP1BB,LAT,KYNU,ITGA2B,DLC1,ARHGAP6,CARMIL1,VCL,LRRFIP2,ALDOA,MEF2C,ABCC4,LMNA,ACTB,CD84,FADS2,PRKAR2B,KIFAP3,NXF3,PTGS1,ACTR2,AKR1C1,ROCK2,SLC16A3,GLUL,PROS1,RPN1,TMBIM1,TPM1,CLCN4,PDK3,CDC42BPA,FAM30A,CTSZ,MMRN1,CTDSPL,SQSTM1,ARF3,PIR,CMAS,STOM,GALE,ARPC4,SNRPN,SEMA3C,ICAM4,HDC,PSTPIP2,DAG1,TFPI,EIF1AY,PDIA3,DDX3Y,ELOVL6,ARL6IP4,RTN3,ATP6V0D1,THBS1,VCP,ACTR3,FAM171A1,RPS4Y1,PFKL,AP2M1,YWHAH,G3BP…	6.EryMeg	Trisomy21vsGATA1s	3123
SPIELMAN_LYMPHOBLAST_EUROPEAN_VS_ASIAN_UP	6.8872	1.11130468882575e-44	1.03656944850222e-42	476	HERC2,MEIS2,CST3,STXBP2,S100A11,OAZ1,B2M,PFN1,MYL6,MACF1,PTPN6,RPN1,CALM1,RHOA,LCP2,SERF2,VASP,NBAS,ARHGDIB,GALE,ARPC4,RREB1,CSK,GPX4,NET1,CYB5R3,CDC42,RPS27L,RTN3,RAB8A,MRPL23,HMGN1,TUBB2A,ARHGAP1,CDK2AP2,BAX,TPP2,GCHFR,ARID3A,CCND2,TCIRG1,HSD17B4,NCOR1,BLOC1S1,RAB1B,STIM1,SNAP29,NDUFB1,ENO3,FKBP2,KHSRP,TADA3,ATP5MF,PNPLA6,CNPPD1,RAP2B,APAF1,HEXIM1,COX5B,ACOT8,ADGRE5,STAT2,RAB5B,RALY,B4GALT1,TAX…	6.EryMeg	Trisomy21vsGATA1s	3122
REACTOME_EUKARYOTIC_TRANSLATION_INITIATION	6.88202	6.6153376991839e-39	4.04620081240248e-37	120	RPS4X,RPS26,RPL7A,RPL12,RPS3,RPS14,RPL18A,RPL10,RPLP0,RPL19,RPL6,RPL28,RPL29,RPL8,RPS5,RPS2,RPL18,EIF4A1,RPS12,RPL11,RPS15,PABPC1,RPL22L1,RPL41,EIF3F,EIF3G,RPS28,EIF3K,RPS7,EIF1AX,RPL3,RPL13,RPSA,EIF3L,RPL32,EIF3D,RPL30,RPL5,RPLP1,RPS8,RPL36AL,RPL35A,RPL36,EIF3I,RPS13,RPS24,RPS3A,RPS27A,FAU,RPL10A,RPL24,RPS15A,EIF5,EIF3B,RPS21,EIF4G1,RPS19,EIF4EBP1,RPS9,RPL26,EIF3M,EIF5B,RPS23,RPL22,RPL34,EIF2S2,…	5.EryP	NormalvsTrisomy21	2868
NUYTTEN_EZH2_TARGETS_DN	6.87511	1e-50	1.24366666666667e-48	988	LAT,RPS10,AIG1,ITGB1,RNF182,IL1RAP,XK,IFI27L2,ROCK2,GPD2,DIPK2A,LRP12,LXN,SLC43A3,ITGA6,SLC40A1,CMAS,SLC44A1,PJA2,CCM2,CD46,DNAJC3,HP1BP3,MYH9,EIF2AK1,CYB5R3,TMEM41A,CDC42,LIMD2,VCP,TRAPPC10,TBXAS1,ADD1,LAT2,TGOLN2,YWHAH,CASP6,RAC1,CLASP2,AUH,CDK2AP2,SP100,PPP2R5A,DCP2,SNAP23,GCHFR,GTDC1,C1D,PAK2,ATP2C1,SYNE2,FKBP5,AP2B1,LZIC,MAP4K4,PACSIN2,EIF3J,TNIP2,MKRN1,NFU1,DPH6,PLCXD1,PDZD8,CYREN,LAMP2,MPZ…	6.EryMeg	Trisomy21vsGATA1s	3121
JOHNSTONE_PARVB_TARGETS_3_UP	6.87334	6.8487867172827e-50	7.62157518866564e-48	424	TIMP1,FLNA,ASAH1,APLP2,TXNIP,COL18A1,HLA-B,C15orf39,CAPN1,AHNAK,AKR1C1,CST3,PSAP,CTSA,ANXA1,NFKBIA,NEAT1,CD55,ARPC1B,RHOB,S100A4,SQSTM1,KLF6,KLF10,IQGAP1,CITED2,ATP6V0C,CD9,FLOT2,JAK1,ELOVL6,SMAD3,F11R,CTSD,GRN,C17orf49,NDFIP1,STAT6,ALDH3B1,PAK2,PRNP,P4HB,MYH9,CSF1,TAX1BP1,JUP,DDOST,TGFBR2,WASHC2C,SGK3,UNC93B1,JAG1,PBXIP1,ACADVL,CYTOR,EIF4G1,ICAM1,CTSS,TPP1,OSBPL3,MGAT4B,TNIP1,ARAF,ACTB,MLEC,GSN,…	5.EryP	NormalvsGATA1s	3630
HSIAO_HOUSEKEEPING_GENES	6.86889	3.00872465655506e-47	4.3111552723061e-45	384	PDLIM1,PLP2,FLNA,TMSB4X,APLP2,TAGLN2,CST3,OAZ1,B2M,ALDOA,ARHGDIB,CD63,GLUL,RPS10,GSTP1,PFN1,MSN,ACTB,PTPN6,S100A10,LGALS1,CD164,CYB5R3,CAPNS1,GNAS,CLIC1,ARPC2,TXNIP,ILK,PSAP,HLA-B,IQGAP1,PIM1,RPL36AL,ITGB1,TMBIM6,CAP1,RHOA,ARF3,EIF4G2,YWHAB,ANXA11,PGAM1,ZFP36,STOM,MYH9,DAZAP2,SOD1,COMT,FUCA1,SQSTM1,HNRNPF,LAMP1,GAPDH,GPX4,FYN,ARHGAP1,YWHAH,SON,FTH1,CIRBP,CFL1,BCAP31,OS9,HNRNPK,YWHAZ,RPN2,AP3S1,GP…	6.EryMeg	NormalvsGATA1s	3179
REACTOME_INNATE_IMMUNE_SYSTEM	6.86763	1e-50	8.77529411764706e-49	1031	LRRC7,LAT,CYBA,ASAH1,FCER1A,TYROBP,VCL,SLC2A3,PTPRC,CD55,DNM3,CD4,ACTR2,B2M,CD63,LYZ,SERPING1,PSAP,BIN2,YES1,CST3,IQGAP1,GSTP1,LYN,HLA-B,S100A11,HSP90B1,YPEL5,DNAJC3,ARMC8,CAPN1,CTSA,HLA-C,TXNIP,TAX1BP1,ARPC2,CFP,TAB2,CFH,CDC42,PTPN6,RELB,UBR4,CD46,CTNNB1,PIK3CA,ITCH,MYH9,WASF2,NFKBIA,NCF4,MAP3K8,LCP2,RAB10,CTSH,UBC,ERP44,FCGR2A,LAT2,ABI1,B4GALT1,RNF216,ALDOA,MEF2C,CYLD,RNASET2,PIK3CB,LAMP2,FOS,N…	5.EryP	Trisomy21vsGATA1s	3703
REACTOME_CELL_CYCLE_MITOTIC	6.86643	1.34497988233987e-46	1.25442631632848e-44	496	PPP1R12A,LYN,PRKAR2B,MAX,PRKCB,DYRK1A,CLASP2,RAB2A,LMNA,CDC14A,TUBA1C,PPP2R5A,ORC4,NIPBL,TFDP2,ESCO1,EP300,CENPC,JAK2,PSMD1,NDEL1,STAG1,UBE2E1,E2F3,CDK11A,PSME4,MAPK1,TAOK1,EML4,PPP1CB,CLASP1,BLZF1,TUBB1,CKAP5,CDKN2A,RANBP2,CEP192,CEP70,AHCTF1,PCM1,MNAT1,PPP2CB,CCND3,PPP2R5C,PPP1R12B,RAB1A,SPAST,CHMP4B,GSK3B,PPP2R2A,PRIM2,TUBGCP3,CCND2,NUP93,YWHAG,CDKN2D,PDS5B,NUP214,AKAP9,HDAC8,PSMD14,CDK11B,STA…	7.EMPP	Trisomy21vsGATA1s	3248
PUJANA_ATM_PCC_NETWORK	6.8641	1e-50	1.24366666666667e-48	1325	KYNU,TGFB1,ITGA2B,IL2RG,CD36,FCGR2A,MAX,GYPE,B2M,SPTLC2,RSU1,ZNF804A,PDCD10,RGS10,ACTR2,GNAQ,ARPC3,GPD2,HPS1,PRMT2,PTPN6,PTPRC,U2AF1,NCF4,JARID2,ELF1,ARPC1B,NBEAL2,GP1BA,PDK1,ARPC5,RSRP1,ARPC2,BTK,PIM2,IL7,STAT1,CAP1,ARHGDIB,PRKCD,GPSM3,ALOX12,PTP4A2,RCOR1,RANBP9,RREB1,CSK,EPB41,CBFA2T3,PPP6R1,LYN,OSTF1,HMGN3,PLCG2,EIF1AY,RGS6,ARNT,OSBPL3,HMGN1,ACTR3,STK10,YWHAB,STRN,AMMECR1,TGOLN2,RABEP1,NMI,KIA…	6.EryMeg	Trisomy21vsGATA1s	3120
REACTOME_CELLULAR_RESPONSES_TO_STIMULI	6.86155	1e-50	8.77529411764706e-49	750	CYBA,HSPA5,TLN1,DNAJB6,BACH1,GSTP1,SQSTM1,LMNA,HSP90B1,DNAJB11,DNAJC3,MT-CO1,TFDP2,TXNIP,HERPUD1,RPS10,TUBA1C,NCF4,HIF1A,UBC,SESN1,CALR,MEF2C,EIF2AK1,FOS,TNIK,VCP,FKBP5,FNIP1,CUL3,ATP6V1A,KDM6B,NFKB1,TXNRD1,CAPZB,ETS2,NCOR1,TALDO1,NCOA2,EP300,CREB1,CDKN2D,MAP1LC3B,MAP2K4,ATP6V0C,E2F3,RANBP2,EIF2AK3,ADD1,PPP1R15A,CAPZA1,HIF3A,TPP1,LAMTOR1,MAPKAPK2,ATF3,SERPINH1,DCP2,HIGD1A,CREB3L2,NCOA1,TBL1XR1,CI…	5.EryP	Trisomy21vsGATA1s	3702
JIANG_MELANOMA_TRM1_CD8	6.85929	4.59633355230779e-42	3.23304367603838e-40	174	FOSB,NR4A2,RASGEF1B,TAGLN2,AHNAK,ZFP36,TNFSF9,SLC2A3,DNAJB6,IER2,HSPA5,NR4A1,FOS,ANXA1,NFKBIA,CD55,SQSTM1,KLF6,GADD45B,CITED2,DUSP1,TSC22D3,RSRP1,JUNB,PTGER4,LMNA,MALAT1,TENT5C,TUBB4B,KDM6B,SYAP1,MYADM,DDX3X,CSRNP1,YPEL5,EIF5,ZFP36L2,DNAJB1,JUN,DUSP2,HSPA8,NR4A3,PIK3R1,SERTAD1,TNFAIP3,UBC,STK17B,BTG2,MCL1,PPP1R15A,NFKBIZ,HSPA1A,TUBA1A,EZR,EIF1,SELENOK,CEMIP2,RNF19A,IDS,RGS1,BIRC3,SDCBP,DDIT4,FTH1…	5.EryP	NormalvsGATA1s	3629
CHEN_METABOLIC_SYNDROM_NETWORK	6.85813	1.5749608969311e-44	2.5005017474255e-42	1210	ACTG1,RGS1,ARHGDIB,GMFG,MAP3K8,ABCG1,CA2,CD34,SRGN,VIM,NPDC1,CLIC1,LGALS1,CD37,CORO1A,ARHGAP9,IQGAP2,AKR1A1,LAT2,JUN,FERMT3,FOS,AHCY,ARPC1B,ITGB2,INPP5D,NCF4,CSTB,GPSM3,CSF3R,MAGED2,FES,STAT4,WAS,RAC2,VAT1,ITM2C,DDAH2,IL1RL1,SYNGR2,CTSD,ARHGAP25,HCST,CAPG,RILPL2,PRKX,METRNL,MZT2A,FSCN1,S100A11,GSDMD,PTPN6,MAN2B1,EVL,MYL12B,PRMT2,RALGDS,FXYD5,ITPRID2,PLAC8,PLTP,LAPTM5,TWF2,POLD4,PKM,SNX5,FMC1,RAB3…	7.EMPP	NormalvsTrisomy21	2776
MILI_PSEUDOPODIA_CHEMOTAXIS_DN	6.85127	3.71746561817786e-45	3.64996426879516e-43	453	APLP2,VCL,TLN1,RPS10,SPNS1,CD9,ITGB1,LY6E,PTGS1,SGMS1,KLF6,TXNIP,MALAT1,MAST4,TNFSF9,HSPA5,LRP12,PSAP,RPN1,ZMYND8,CLCN4,SQSTM1,CLIC1,GLG1,LGMN,NEAT1,ESYT1,DAG1,LMBRD1,PDIA3,CTNNA1,MMP14,THBS1,VCP,GPR108,FOS,FAM171A1,ADD1,PFKL,SCPEP1,OBSL1,FOSB,SNX14,PTPRA,SCAMP2,MFSD11,GRN,SERPINE1,SLC10A3,SPPL2A,CDIP1,PDIA5,WDR26,GSPT1,NEDD4L,SNX29,C6orf89,DIAPH1,FAM53B,HSD17B12,AREL1,PLD3,SEL1L,TMED7,MPZL1,B3GN…	6.EryMeg	Trisomy21vsGATA1s	3119
KOINUMA_TARGETS_OF_SMAD2_OR_SMAD3	6.85014	1e-50	1.69568181818182e-48	813	PDLIM1,STON2,VCL,BACH1,ACTN1,ELL2,ZFP36L1,DHRS3,CD55,SGMS1,MBOAT2,MAST4,ITGB1,ZMYND8,PLP2,PIM1,ARHGAP21,SLC7A5,TLN1,HSPA5,TES,SUSD1,OSBPL3,PTBP3,RUNX1,GSE1,MICALL2,CLIP2,CLTC,NET1,IFRD1,SPECC1,NPTN,TMEM87A,RNH1,PLD1,ABHD2,SMAD3,S100A10,FGD3,CMIP,RIN3,MYH9,SYK,LNPEP,MBOAT1,SESTD1,SREBF1,MBNL1,BLZF1,STAM2,C15orf39,RHOC,TAX1BP1,SUSD6,FCHO2,YWHAZ,ETS2,F11R,TMBIM1,MPZL1,MALT1,FURIN,AHNAK,STK10,TXNRD1,…	7.EMPP	NormalvsGATA1s	3120
PICCALUGA_ANGIOIMMUNOBLASTIC_LYMPHOMA_DN	6.83429	2.59531981137777e-41	1.599875245708e-39	128	KLF6,NR4A2,SLC2A3,DNAJB6,YPEL5,KLF10,FOSB,PNPLA8,PTGER4,CSRNP1,CCNL1,GADD45B,JMJD1C,MAP3K8,REL,CNST,STK17B,G3BP2,MCL1,PRNP,IRF2BP2,PTP4A2,KDM6B,ZBTB10,ZFP36,TIPARP,ZFC3H1,CHD1,FBXW7,PPP1R15A,PIGA,SON,ATP2B1-AS1,PER1,GABARAPL1,HIPK1,SMURF2,SETD2,DDX3X,RGCC,SUCO,SIK3,KDM3A,EPC1,TNFAIP3,HECA,CNOT6L,PPP1R15B,TUBB2A,RNF11,MXD1,IFRD1,EIF5,FBXO33,RAPGEF6,JMY,CBX4,PHF1,ZFAND5,IDS,NAMPT,NR4A3,MYLIP,RNF139…	5.EryP	Trisomy21vsGATA1s	3701
REACTOME_VIRAL_INFECTION_PATHWAYS	6.83185	1e-50	8.77529411764706e-49	801	TGFB1,GPC4,CD4,B2M,MED13L,HLA-A,SMAD3,HLA-B,DNAJC3,JAK1,STAT1,YWHAZ,HLA-C,PPP1CB,TAB2,RCOR1,PTPN6,RPS10,ITGB1,TUBA1C,ITCH,NFKBIA,ARIH1,UBC,CALR,CLTC,G3BP2,ARID4B,CHMP4B,VCP,HSPG2,POLR2A,UVRAG,CUL3,ELMO1,NFKB1,AP1G1,UBAP1,SERPINE1,AP1S2,RPN1,SYK,TRAF6,NCOR1,FURIN,DOCK2,EP300,CREB1,YWHAG,MAP1LC3B,CTDP1,MED21,RAB5C,RANBP2,GATAD2A,TBL1XR1,HMG20B,DDX5,CHD3,ROCK2,AP2B1,VPS37A,IRF7,MED13,FNTB,ZDHHC20,CC…	5.EryP	Trisomy21vsGATA1s	3700
REACTOME_INNATE_IMMUNE_SYSTEM	6.82905	1e-50	1.24366666666667e-48	1031	LAT,LRRC7,ASAH1,DNM3,SLC2A3,CST3,FCER1A,VCL,TYROBP,S100A11,CD36,FCGR2A,ALDOA,B2M,MEF2C,CFH,CD63,ARMC8,CD4,BIN2,ACTB,FCER1G,LAMTOR1,IQGAP1,LYZ,CYBA,CAPN1,CTSA,ACTR2,CD55,ATP6V0E1,ARPC3,TXNIP,SERPING1,PTPN6,PROS1,GSN,TRAPPC1,PTPRC,NCF4,RAB10,PSAP,CD68,TMBIM1,CALM1,ARPC1B,NBEAL2,RHOA,CTSH,LCP2,GSTP1,FYN,PIK3CB,CTSZ,ARPC5,ARPC2,BTK,PRKCQ,CAP1,PRKCD,STOM,LGMN,ARPC4,CD46,PSMD6,DNAJC3,MYH9,FUCA1,CYB5R3,…	6.EryMeg	Trisomy21vsGATA1s	3118
NUYTTEN_NIPP1_TARGETS_DN	6.82704	1.03037963385883e-50	1.26044144718928e-48	825	TGFB1,DLC1,PLP2,VCL,MBOAT2,ACTB,MYL6,SPTLC2,INF2,DHRS3,PDCD10,XK,S100A10,RGS10,PTTG1IP,TXNIP,ROCK2,PRMT2,SH3BGRL3,GNAS,LAMA5,DIPK2A,EIF4G2,ATP2A3,RAB10,CXXC5,BMP2K,SLC43A3,GNAI2,FAM89B,EHBP1L1,TUBB1,CTSZ,SLC40A1,PIR,LPP,SLC44A1,PJA2,FER,PRKAR1A,RANBP9,KIF2A,NUDT4,TENT5C,ORC4,DAG1,ATP6V1A,LRP10,SERPINH1,PECAM1,LIMD2,KLF2,GALNT10,KLF11,ARNT,OSBPL3,PREX1,STK10,FUCA2,ANXA3,AMMECR1,TGOLN2,SCPEP1,SUSD3…	6.EryMeg	Trisomy21vsGATA1s	3117
BENPORATH_NANOG_TARGETS	6.82582	1e-50	1.24366666666667e-48	958	APLP2,ASAH1,ZFP36L1,STXBP2,S100A11,B2M,MBOAT2,RYR3,ITGB1,INF2,DHRS3,SGMS1,RGS10,EIF4G2,CA2,HSPA5,JARID2,GPC4,SMAD3,CITED2,SLC40A1,PIM2,ARF3,CLIC1,SLC44A1,GLG1,SNRPN,ABHD2,SEMA3C,DDX17,NAA38,JPT1,ATP6V1A,SERPINH1,TALDO1,GPR108,UBC,SPRY1,STRN,RUNX1T1,NDUFA13,ARHGAP1,MORF4L1,OBSL1,MAP1LC3B,AP1S2,GNPTAB,ANGPT1,RBM4,COPE,CDYL,TRIM24,NCOR1,ANKMY2,ZFAND6,WDR81,EXOC4,AP3B1,AP1G1,IGF2BP3,BMP2,GXYLT1,ELL2,…	6.EryMeg	Trisomy21vsGATA1s	3116
REACTOME_SIGNALING_BY_RHO_GTPASES_MIRO_GTPASES_AND_RHOBTB3	6.82476	2.15432357564452e-50	3.57186848841861e-48	652	DLC1,ARHGAP6,FLNA,ACTN1,STAM,PPP1R12A,PLEKHG1,CDC42BPA,RHOBTB3,ROCK2,PRKCB,ITGB1,TUBA1C,FNBP1L,CTNNB1,ARHGAP21,ACTR3,ARHGEF7,IQGAP1,CYBA,NCF4,CLTC,NET1,ARHGAP12,ACTR2,TMEM87A,CENPC,ARHGAP18,ARHGAP10,PLD1,PREX1,VCP,DBN1,MRTFA,FGD3,CCDC88A,MYH9,BTK,PPP2CB,GMIP,KIF5B,STAM2,RHOC,CDC37,RHOB,TUBB1,ABCD3,TUBB4B,NDEL1,CLASP2,FGD4,KDM4C,YWHAZ,PRKCD,NCOA2,ESYT1,YWHAB,WIPF2,PPP2R5A,WDR11,MTR,STK10,NCKAP1L,C…	7.EMPP	NormalvsGATA1s	3119
MULLIGHAN_MLL_SIGNATURE_2_UP	6.82221	5.84306869699919e-44	7.03147347553403e-42	412	KYNU,FLNA,APOC2,TRAPPC10,CTSA,GLG1,IQGAP1,CYBA,ATP6V0E1,LGALS1,SLC16A3,ACTR2,APOBR,MYO1F,ABHD2,PSEN1,OSBPL8,SYK,LNPEP,UGGT1,CCND3,APBB1IP,IGFBP7,MBNL1,EHBP1L1,C15orf39,PECAM1,CLASP2,PRKCD,FES,SELPLG,MALT1,OAZ1,P4HB,TNPO3,PCYT1A,AKAP9,ABHD17A,MFN2,ADARB1,MICAL1,MFSD1,FAM53B,GRN,PLEKHB2,GRB2,C11orf21,DHRS7B,RAB6A,HSPA1A,KRI1,CLN3,BCAP29,PPIF,TRAF3IP3,LAMP1,NINJ2,ARPC2,ARHGAP1,ELF4,TBCD,IL10RB,S100A…	7.EMPP	NormalvsGATA1s	3118
ZHENG_BOUND_BY_FOXP3	6.81636	1.99803147145106e-44	2.48455213474939e-42	486	LDLRAD4,CHD7,MIR4435-2HG,RABGAP1L,NR4A2,SGMS1,STK24,FYB1,PRKAR2B,MACF1,ANXA1,JARID2,MAP4K4,MAP3K5,ACTR3,ATXN7,TP53INP1,CITED2,MAP3K8,PTBP3,PRKCQ,C21orf91,GPD2,PTPRC,SP100,EPB41,CNOT2,MT-ATP6,GTDC1,JAK1,SMAD3,ITGA6,MRTFA,OSBPL8,ZFAND6,GNG2,TGFBR2,APBB1IP,TENT5C,MBNL1,NCOA3,HECTD1,KLF2,TBC1D4,ZC3HAV1,TEC,SNCA,SNX14,FYN,NUS1,TOX,MALT1,STK10,CDC42SE2,AGPS,ITPR2,HEATR5A,EXOC2,IBTK,FRS2,ATP2B1,ZNF217,T…	7.EMPP	NormalvsGATA1s	3117
BENPORATH_CYCLING_GENES	6.81634	1.8649036101464e-49	1.93224735162391e-47	630	VCL,RHOBTB3,TIMP1,DNAJC3,GSE1,TOP1,NCOA3,LMNA,STAT1,JMJD1C,AGFG1,LPP,OSBPL6,NIPBL,KLF6,DNAJB6,RUNX1,MYCBP2,NUDT4,AGPAT3,CTNND1,ATF7IP,JPT1,DNAJC6,STAG1,ITPR1,FBXL20,STAT5B,USP6NL,TXNRD1,FYN,PPP3CA,PSEN1,KRAS,MID1,PPP6R3,CKAP5,HP1BP3,SS18,CEP70,KIF20B,ITGB3,ROCK1,CCDC14,MAP3K2,KIF5B,ZNF217,CDR2,OGT,SLC25A36,NFE2L2,MAN1A2,ATL2,QRICH1,ARL4A,ZBTB7A,PRIM2,INSR,CDKN2D,MITF,TAB2,DMTF1,TRA2A,MTCL1,CEP44,…	7.EMPP	Trisomy21vsGATA1s	3247
REACTOME_RRNA_PROCESSING	6.81368	1.35496471951138e-36	7.89902088827651e-35	203	RPS4X,RPS26,RPL7A,RPL12,RPS3,RPS14,RPL18A,RPL10,RPLP0,RPL19,RPL6,RPL28,RPL29,RPL8,RPS5,RPS2,RPL18,RPS12,RPL11,RPS15,RPL22L1,RPL41,RPS28,RPS7,RPL3,RPL13,RPSA,RRP1,RPL32,RPL30,RPL5,RPLP1,WDR18,NOB1,RPS8,IMP3,PES1,RPL36AL,RPL35A,RPL36,EXOSC5,BOP1,RPS13,RPS24,RPS3A,NHP2,RPS27A,FAU,RPL10A,EBNA1BP2,IMP4,RPL24,RRP7A,SNU13,TSR1,RPS15A,PELP1,NOP56,FBL,WDR46,RPS21,EXOSC4,BYSL,ELAC2,RPS19,MRM3,BUD23,CSNK1E,…	5.EryP	NormalvsTrisomy21	2867
DANG_BOUND_BY_MYC	6.81282	1e-50	8.77529411764706e-49	1010	TGFB1,MEIS2,CYBA,ASAH1,PAPPA,SPTLC2,CD164,ABCC4,U2AF1,ZFP36L1,MSN,CD63,NID1,PSAP,BSG,GSTP1,SMAD3,SQSTM1,LMNA,JARID2,NFAT5,HSP90B1,RABGEF1,TAGLN2,TPP2,PPP1CB,HERPUD1,PTPN6,OAZ1,ITGB1,MBNL1,ARHGEF7,DDX17,HIF1A,PDCD10,PPP1R12A,CALR,IRF9,GMIP,RBM39,RNASET2,SDF2L1,MCL1,VCP,RAB1A,BZW1,PIAS1,NFIL3,SRRM2,SERPINE1,MKRN1,SYK,GPSM3,SNX3,CREB1,LNPEP,BTBD1,LAMP1,MKLN1,E2F3,FLOT2,CAPZA1,FOSL1,APC,BIRC6,PTPN1,V…	5.EryP	Trisomy21vsGATA1s	3699
GEORGES_TARGETS_OF_MIR192_AND_MIR215	6.8091	1e-50	8.77529411764706e-49	865	MEIS2,HERC2,IL1RAP,RHOBTB3,CD164,CHD7,GPC4,STAM,LIMS1,LRRFIP2,OSBPL6,ACTR2,MSN,MTSS1,MACF1,IQGAP1,KLF10,DNAJC3,CD83,ELL2,WWC2,PPP1CB,NCOA3,PPP1R18,DYRK1A,OSBPL8,ITGB1,GNAS,RAB2A,SPAG9,ZNF273,C21orf91,BMP2K,PPP1R12A,STK17B,FNDC3B,FOS,CCNY,RAB1A,ZMAT3,PRNP,UVRAG,AP1S2,FAM20B,RSRC1,CDKN2D,PRKAR1A,ZBTB10,MAP1LC3B,ATG10,RAB8B,EIF2AK3,LRRFIP1,CPSF6,EHBP1L1,CEMIP2,APC,ZNF267,DCBLD2,BMPR2,USP14,BCOR,OPA1…	5.EryP	Trisomy21vsGATA1s	3698
JOHNSTONE_PARVB_TARGETS_3_UP	6.80803	2.0672742698925e-46	1.55755543223517e-44	424	TIMP1,KLF6,APLP2,ASAH1,FLNA,AKR1C1,CD55,NEAT1,PSAP,CST3,C15orf39,COL18A1,IQGAP1,CYTOR,SMAD3,SQSTM1,HLA-B,NDFIP1,KLF10,CAPN1,JAK1,RHOB,CTSA,TXNIP,TAX1BP1,CD9,S100A4,AHNAK,MYH9,NFKBIA,GLS,F11R,TGFBR2,CTNND1,VMP1,PNRC1,RNASET2,SGK3,ELOVL6,ARPC1B,TNIK,ALDH3B1,PRNP,WASHC2C,SMURF1,ATP6V0C,FLOT2,GRN,HUWE1,TNKS2,MAP4,LRRFIP1,ANXA1,TPP1,DAG1,C17orf49,CITED2,ATXN7,JAG1,MAP2K3,RAB7A,PAK2,OSBPL3,PLD1,ICAM1,A…	5.EryP	Trisomy21vsGATA1s	3697
GARY_CD5_TARGETS_DN	6.80466	1.93619103040254e-43	1.62291967267449e-41	430	SGMS1,BMP2K,MAX,USP15,HSPA5,ZNF407,FAR1,TXNIP,DNAJB6,TANK,HSP90B1,PSMD1,RBM25,DNAJB11,STAG1,CITED2,USP6NL,WWP1,YTHDF3,SLC44A1,ATP2B1,BLZF1,TDG,UBE2K,SENP6,DHX9,PBRM1,RUNX1T1,FMR1,TFRC,SGK3,STK17A,XPO4,MRPS12,ZNF451,ATP6V0E1,RALGPS2,ASCC3,EIF3J,IDE,LARP4,CNOT4,DNAJA1,CDK12,THADA,STX7,CUL2,DAAM1,RLIM,PLAA,HEATR1,USP16,PAFAH1B1,SLC30A7,SRSF11,OGA,KLC1,SOAT1,LANCL2,FUBP3,NHLRC2,FUBP1,DLEU1,TWF1,MAGT1…	7.EMPP	Trisomy21vsGATA1s	3246
DANG_BOUND_BY_MYC	6.80355	1e-50	1.1134328358209e-48	1010	ABCC4,MEIS2,TGFB1,PAPPA,JARID2,PPP1R12A,ASAH1,MAP3K5,ZFP36L1,SPTLC2,MBNL1,U2AF1,ITGB1,PDCD10,SMAD3,RABGEF1,BIRC6,ACTR3,TOP1,NFAT5,LMNA,ARHGEF7,NID1,DDX17,MAN2A1,PDK3,TCF12,LNPEP,XK,TPP2,APC,HSP90B1,HERC1,CORO1C,CYBA,CD164,PTPN1,MSN,AMMECR1,CAPZA1,E2F3,GCLC,CD2AP,SRRM2,PPP1CB,PPP3CA,PIAS1,BLZF1,RAB3GAP2,FRY,CD63,MKLN1,UBE2K,PCM1,POU2F1,RNASET2,ITGA6,KIF20B,FXN,SYK,TFRC,GMIP,MLXIP,BTBD1,RAB1A,ZNF45…	7.EMPP	Trisomy21vsGATA1s	3245
REACTOME_CELL_CYCLE_MITOTIC	6.79932	1.95711141888044e-44	1.73856731043879e-42	496	TUBA1C,MAX,LMNA,PRKAR2B,CCND3,PRKCB,CDKN2D,CDKN2A,PPP1R12A,TUBB1,PSMD6,KIF2A,ORC4,LYN,RAB8A,UBC,TUBB2A,CLASP2,PPP2R5A,POLD4,CHMP4B,CCND2,RAB2A,DYNC1I2,PPP1CB,RAB1B,JAK2,PSMA7,PRKACA,ANAPC11,BLZF1,TUBB4B,CKAP5,TFDP2,CHMP2A,AKT2,TAOK1,DYRK1A,SSNA1,YWHAE,CHMP4A,RB1,DCTN1,SPAST,CDK11A,LPIN2,DYNC1I1,DYNC1LI2,RBX1,E2F3,NUMA1,CTDNEP1,NUP210,CHMP3,MAPK1,PPP2CB,EP300,ESCO1,MAPRE1,CDKN1C,PSMD1,DCTN2,RBL2,N…	6.EryMeg	Trisomy21vsGATA1s	3115
DANG_BOUND_BY_MYC	6.79335	6.46868550744008e-49	5.67874485370799e-47	1010	RPS26,ZFP36L2,RPL10,RPL19,SOD1,HSPA8,ENO1,CCT8,GAPDH,RPL8,ATP5PO,SERP1,GSTP1,RPS5,RPL18,EIF4A1,SYNGR2,CPSF1,RBM8A,LSP1,MYC,RPS15,MAT2A,ATP5F1B,HINT1,PHB2,AKR1A1,CCT7,EIF3K,TAGLN2,SRM,RPL3,NME2,RPL13,ATP5MC2,PSMG1,NACA,OAZ1,RPL32,MFNG,IER2,TGFB1,CDK4,RPL5,SNX5,CSTB,HMGA1,RAC2,CTDSP1,JUNB,TRAP1,PTPN6,FPGS,NPM1,APEX1,ZNF593,KEAP1,PKM,PYCARD,ODC1,CSF2RB,NME1,CTSC,EIF3I,SRSF7,PSMD8,CYBA,NDUFB2,GPSM3,R…	5.EryP	NormalvsTrisomy21	2866
JIANG_MELANOMA_TRM5_CD8	6.78985	8.67737264487082e-36	9.25007923943229e-34	187	FTH1,ZFP36L2,GAPDH,EIF1,BHLHE40,HMGN1,NR4A1,RGS1,EIF4A1,CTSW,FOSL2,ZFP36,NR4A3,GSTP1,PIM1,NFKBIA,IER2,BTG1,JUNB,ANXA1,DNAJB1,FOSB,IL2RG,TNFAIP3,HSPA8,BTG2,PPP1R16B,FOS,AKAP13,WSB1,CAPNS1,CD82,ENO1,JUND,DUSP1,CAPG,SERTAD1,NFKBIZ,UBE2S,WBP1,PKM,HERPUD1,PRDX6,FTL,LITAF,HSP90AB1,CITED2,BRD2,SMAD7,IFRD1,KDM6B,CALM2,GADD45B,EMC10,CREM,ZNRF1,GCH1,SAT1,FUS,DNAJA1,PRR7,ODC1,NFKBID,ITGAE,PLD3,EMD,MXD4,ZC3H…	7.EMPP	NormalvsTrisomy21	2775
BENPORATH_MYC_MAX_TARGETS	6.78946	1.30377916546781e-50	1.40959312672316e-48	738	ABCC4,JARID2,PPP1R12A,ASAH1,MAP3K5,SPTLC2,MBNL1,U2AF1,PDCD10,SMAD3,RABGEF1,BIRC6,ACTR3,NFAT5,ARHGEF7,DDX17,PDK1,MAN2A1,PDK3,TCF12,LNPEP,XK,TPP2,HSP90B1,HERC1,COG5,CNOT2,CORO1C,CYBA,CD164,PTPN1,TRIM24,AMMECR1,CAPZA1,GCLC,CD2AP,PPP1CB,PPP3CA,TRIM33,PIAS1,BLZF1,RAB3GAP2,FRY,MKLN1,UBE2K,PCM1,POU2F1,RNASET2,KIF20B,SYK,GMIP,BTBD1,RAB1A,UBQLN1,SQSTM1,DCAF8,BCKDHB,ACAD8,CEP83,RNF4,AKAP10,PCYT1A,OAZ1,ILK,…	7.EMPP	Trisomy21vsGATA1s	3244
IVANOVA_HEMATOPOIESIS_LATE_PROGENITOR	6.78841	3.06142529863695e-44	2.65632041609639e-42	501	TYROBP,HCST,SPTLC2,PRKAR2B,RABGAP1L,DAD1,RGS10,UROD,ATP6V0E1,NCOA4,BMP2K,ADRM1,SLC25A21,RHOA,UBE2Q1,ARPC4,ICAM4,STX11,HDC,PSTPIP2,ORC4,OSTF1,DOK3,CDC42,SLC39A3,GALNT10,CA1,ANXA3,C18orf32,HECTD3,GTSF1,AP1S2,TANGO2,NAPA,R3HCC1L,MRPS6,BCAP29,CEMIP2,TSPAN33,UGGT1,ATP9B,SSH1,HECTD4,LZIC,PACSIN2,GMIP,GSR,SEMA4D,ERMAP,ABHD5,SLC33A1,PLEK,RGCC,NFU1,NPTN,TNFAIP8L2,KPNA1,ATP6V1C1,TMEM50B,MRPS36,RAB7A,TWF2,A…	6.EryMeg	Trisomy21vsGATA1s	3114
BLANCO_MELO_COVID19_SARS_COV_2_INFECTION_A594_ACE2_EXPRESSING_CELLS_RUXOLITINIB_UP	6.78819	3.30042314656499e-46	2.46178562502282e-44	418	KLF6,MTSS1,LDLRAD4,KLF10,CD83,FOSB,CSRNP1,CFP,RELB,CCNL1,NFKBIA,REL,CYLD,RBM39,FOS,ARID4B,KLF7,NFIL3,KDM6B,NFKB1,ZBTB43,SERTAD2,PPTC7,TET2,CHD2,ZBTB10,ADAM8,ZFP36,ZBTB20,TIPARP,FBXW7,PPP1R15A,ZNF778,KLF11,STX11,FOSL1,ZNF267,ATF3,HIVEP2,GPCPD1,TANK,FOXN2,SLC26A3,INO80D,PER1,IER2,ICAM5,NOCT,PIM1,N4BP3,CRY1,FRS2,NFKB2,MDM4,MIER1,FERMT3,CHIC2,BIRC2,ARID3B,SENP7,CREBRF,BCL3,NFKBID,EPC1,NEDD4L,TNFAIP3,…	5.EryP	Trisomy21vsGATA1s	3696
NUYTTEN_EZH2_TARGETS_UP	6.78807	1e-50	1.24366666666667e-48	999	APLP2,ANK1,MEIS2,S100A4,ZFP36L1,MAX,FYB1,B2M,CNRIP1,ARMC8,YWHAZ,RHOC,SLC9A9,SGMS1,GNAQ,TRIM58,KLF6,WDR1,TNIK,TXNIP,SLC16A3,BACH1,HSPA5,JARID2,DCBLD2,TPM1,ANXA5,FUT8,CDC42SE1,PIK3CB,PDK1,AGPAT3,SERPINI1,STAT1,SQSTM1,ARF3,WWC2,DNAJB6,STOM,GLG1,LGMN,PTP4A2,CPEB2,TMEM117,TP53BP2,JPT1,ATP6V1A,HLA-C,BNIP3,USP15,SUB1,CDC42,RPS6KC1,ARHGAP21,C15orf39,THBS1,ZC3H12C,HERPUD1,ACTR3,CPQ,TUBB2A,TTC7B,RABEP1,NMI…	6.EryMeg	Trisomy21vsGATA1s	3113
MULLIGHAN_MLL_SIGNATURE_2_UP	6.78176	1.12433393176681e-45	8.22196744808691e-44	412	KYNU,APOC2,CYBA,FLNA,ACTR2,C15orf39,IQGAP1,MYO1F,TRAPPC10,CTSA,ARPC2,CCND3,S100A4,TGOLN2,ELF4,OSBPL8,OAZ1,MBNL1,ABHD2,LAT2,SPI1,LAMP2,CLASP2,ALDH3B1,PLEKHB2,AP1S2,SYK,LAPTM5,LNPEP,LAMP1,GLG1,APBB1IP,GRN,RAB6A,EHBP1L1,TPP1,MAPKAPK2,NIPBL,CHD3,LRP10,GSK3B,LGALS1,PSEN1,APOBR,PRKCD,SLC16A3,MALT1,ABHD17A,KLC1,PTK2B,ATP6V0E1,C11orf21,RNF167,FAM53B,IGFBP7,PLD3,MFSD1,KPNA1,PCYT1A,RASSF2,ARL6IP5,TRIM38,SF…	5.EryP	Trisomy21vsGATA1s	3695
MILI_PSEUDOPODIA_HAPTOTAXIS_UP	6.77388	4.87778174613165e-45	6.27467751860142e-43	514	EIF4G2,PPP1R12A,LIMS1,FNBP1L,YES1,UBR3,PDCD10,CAVIN2,PDK1,NET1,CNOT2,DCAF6,ACTR2,USP16,APC,NCOR1,ESCO1,AGTPBP1,TANK,AGFG1,MBNL1,DNAJA1,KIF5B,TAX1BP1,RALA,PBRM1,SEPTIN7,DCUN1D1,NCOA2,EFR3A,CYB5R4,LTN1,YWHAB,THOC1,PJA2,WWP1,WDR26,SREK1IP1,PTPN2,ATE1,SOS1,ZBTB38,RBM25,TNKS2,DCAF5,TUT7,HMGN3,ZNF326,STRN,DOCK11,RABEP1,ANKRD11,CYB5R3,YTHDF3,YME1L1,CAPZA1,SELENOT,VPS4B,KRAS,PARP4,MYEF2,RNF115,QKI,ROCK1,…	7.EMPP	NormalvsGATA1s	3116
MULLIGHAN_MLL_SIGNATURE_1_UP	6.77234	3.26471036631385e-35	3.29206334505865e-33	378	ATP8B4,FOSL2,LGALS1,IGFBP7,PECAM1,MICAL1,LAT2,PSMB8,ARPC1B,ITGB2,ID2,MALT1,FES,RAC2,ENO1,CXCR4,C15orf39,SYNGR2,CAPG,SEPHS2,CTSA,ATP6V0E1,UQCRC1,SNX17,LAPTM5,POLD4,PKM,GRN,NDUFC1,OXLD1,RRP7A,SDHD,IFNGR2,IL10RB,CCPG1,ARL6IP5,CBFB,SMIM10L1,ARPC2,TADA3,EVI2B,PYCARD,CLTB,SLC25A11,TRAPPC10,CLN3,CD2BP2,SELPLG,HCLS1,LAMP1,SLC1A4,SIPA1,RBM23,BID,OAZ1,PPIF,NLRP3,SDF4,MFSD1,NDUFB8,P4HB,NUBP1,TNFSF13,PLD3,MA…	7.EMPP	NormalvsTrisomy21	2774
ENK_UV_RESPONSE_EPIDERMIS_DN	6.7626	2.09637869148464e-47	1.62884256872749e-45	504	HERC2,ITM2A,ASAH1,ZBTB16,NR4A2,DNAJB6,CD55,ABCC4,STAM,PRKCB,JARID2,PTBP3,CD83,FOSB,ELL2,RHOB,PTGER4,PDGFC,SLC7A5,TP53BP2,S100A4,ELF4,LPP,KLF2,HDAC5,SPAG9,UBE2H,ATP2B1,RNF19A,HIF1A,MAP3K8,CTSH,PACSIN2,STK17B,CDKN1C,PNRC1,RNASET2,PIK3CB,AFF4,EZR,UVRAG,ZNF217,TXNRD1,UBAP1,KDM6A,RSU1,TRAF6,NFATC1,SKAP2,EIF2AK3,LRRFIP1,CEMIP2,ANXA1,KLF11,STX11,FOSL1,APC,PIGA,MAPKAPK2,ATF3,DLG1,RLF,SOS2,HIVEP2,CORO1C,N…	5.EryP	Trisomy21vsGATA1s	3694
REACTOME_VIRAL_INFECTION_PATHWAYS	6.75984	1e-50	1.1134328358209e-48	801	TGFB1,MED13L,ITGB1,ROCK2,CLTC,RCOR1,SMAD3,DNAJC3,YWHAZ,CD4,SOS1,FUT8,NCOR1,STAT1,GPC4,MAN2A1,ITCH,AP1G1,TUBA1C,RUNX1,EP300,RPN1,JAK2,PSMD1,POLR2A,JAK1,RIPK1,RNGTT,AP2B1,ZDHHC20,PSME4,CTDP1,IGF1R,UBAP1,ZDHHC2,FYN,UVRAG,PHF21A,MED13,PPP1CB,CDK19,CUL3,GATAD2A,GRB2,VPS37A,TUBB1,MGAT5,RANBP2,BTK,CCNT2,G3BP2,MED21,CREBBP,MNAT1,GALNT1,CHD4,FNTB,GTF2E2,ST3GAL3,ARIH1,ROCK1,MED15,SYK,ATG14,RPS10,KPNA1,EZH2…	7.EMPP	Trisomy21vsGATA1s	3243
REACTOME_ANTIGEN_PROCESSING_UBIQUITINATION_PROTEASOME_DEGRADATION	6.75605	6.09123024084079e-40	4.5452760057154e-38	305	PRKN,HERC2,RNF182,ZBTB16,UBAC1,UBE2Q1,PJA2,PSMD6,TRIP12,UBE2F,UBC,HECTD3,RNF19A,TPP2,LNPEP,HECTD1,UBR4,BTBD6,NEDD4L,PSMA7,ASB8,ANAPC11,MKRN1,ITCH,LTN1,AREL1,UBR1,NEDD4,NPEPPS,SIAH2,UBA6,FBXW7,WWP1,RNF14,FBXW5,RNF34,ATG7,KBTBD8,UBE2V1,UBE2W,RBX1,BTBD1,KLHL2,UBE2L3,PSMD1,FBXW2,FBXL15,HUWE1,FBXL4,CDC34,KLHL21,SMURF1,UBA7,LNX1,UBE2K,CBLB,PSMD2,RCHY1,PSMD4,PSMB1,KLHL9,PSMA4,PSMB2,UBE2Q2,UBE2J1,PSMD11,…	6.EryMeg	Trisomy21vsGATA1s	3112
REACTOME_NEUTROPHIL_DEGRANULATION	6.75498	1.02794860893517e-49	1.53184901703518e-47	465	LRRC7,ASAH1,S100A11,TYROBP,LAMTOR1,CST3,FCGR2A,B2M,VCL,CYBA,SLC2A3,CAPN1,ALDOA,CD36,CD63,CTSA,TRAPPC1,GSTP1,FCER1G,PTPN6,PFKL,BIN2,CYB5R3,LYZ,ARMC8,CTSZ,GSN,PSAP,ACTR2,TMBIM1,HLA-B,PECAM1,IQGAP1,ARPC5,CAP1,RHOA,PKM,VCP,CD55,ATP6V0C,PSMD6,CD68,RAB5C,CTSC,NBEAL2,HLA-C,GMFG,CMTM6,PGAM1,TSPAN14,STOM,CTSH,PYGL,FUCA1,GRN,PRKCD,LAMP1,OSTF1,RAB10,TCIRG1,MAN2B1,CFP,NCKAP1L,FTH1,DOK3,SERPINB1,HSPA8,DDOST,A…	6.EryMeg	NormalvsGATA1s	3178
REACTOME_EUKARYOTIC_TRANSLATION_ELONGATION	6.75349	1.30236030912092e-35	7.36228229292446e-34	94	RPS4X,RPS26,EEF2,RPL7A,RPL12,RPS3,RPS14,RPL18A,RPL10,RPLP0,RPL19,EEF1A1,RPL6,RPL28,EEF1G,RPL29,EEF1B2,RPL8,RPS5,RPS2,RPL18,RPS12,RPL11,RPS15,RPL22L1,RPL41,RPS28,RPS7,RPL3,RPL13,RPSA,EEF1D,RPL32,RPL30,RPL5,RPLP1,RPS8,RPL36AL,RPL35A,RPL36,RPS13,RPS24,RPS3A,RPS27A,FAU,RPL10A,RPL24,RPS15A,RPS21,RPS19,RPS9,RPL26,RPS23,RPL22,RPL34,RPL15	5.EryP	NormalvsTrisomy21	2865
BENPORATH_CYCLING_GENES	6.75211	3.75265311776424e-47	4.05830399489229e-45	630	TIMP1,VCL,LMNA,RHOBTB3,KLF6,CDKN2D,FYN,ITGB3,OSBPL6,AGPAT3,STAT1,ARHGDIB,LPP,DNAJB6,PRKAR1A,DNAJC3,HP1BP3,NUDT4,JPT1,VPS25,MID1,CDC42,ARL4A,PSMG3,GSE1,TUBB2A,YWHAH,NCOA3,CTNND1,INSR,ORMDL1,PTMS,ADCY6,BMP2,TSG101,AGFG1,STAT5B,TUBB4B,PLCXD1,CKAP5,PKNOX1,TOP1,ADGRE5,ZBTB7A,UACA,CCDC14,ZNF217,ANP32E,PPP6R3,ELP3,STAG3,PSEN1,MYCBP2,KATNBL1,PANK2,KAT2B,BIRC2,KATNA1,NFE2L2,HPS4,MITF,TXNRD1,VANGL1,OGT,ATF…	6.EryMeg	Trisomy21vsGATA1s	3111
REACTOME_INNATE_IMMUNE_SYSTEM	6.75027	2.44646779245833e-40	3.20272678374106e-38	1031	FTH1,PCBP2,EEF2,SELL,ACTG1,SERPINB1,GMFG,ICAM3,MAP3K8,CNN2,HLA-E,ATP8B4,FCER1A,ILF2,GSTP1,NFKBIA,PFKL,EEF1A1,CCT8,CYB5R3,APRT,PECAM1,APP,IMPDH2,JUP,ARHGAP9,TRAPPC1,PPP2R1A,UBB,DDOST,ICAM2,IL1B,HLA-B,TNFAIP3,IQGAP2,LAT2,LAMTOR1,HSPA8,JUN,FOS,PSMB8,ARPC1B,ITGB2,NCF4,CSTB,MALT1,CTSC,WAS,RAC2,MAPKAPK3,VAT1,DDX3X,IRAK3,ATP6V0C,PIK3R1,CTSD,A1BG,ATP6V1G1,CMTM6,WIPF1,TUBB4B,PSME1,S100A11,CD81,CTSA,B2M,GS…	7.EMPP	NormalvsTrisomy21	2773
SENESE_HDAC3_TARGETS_UP	6.73697	3.78507395992583e-45	4.95446259912397e-43	475	KYNU,SLC2A3,ABCC4,PAPPA,IL1RAP,BACH1,NR4A2,CD55,TRAPPC10,CPEB4,NEAT1,PTBP3,IQGAP1,TNIK,CD46,ZMAT3,ACTR2,USP16,PLD1,GTDC1,MAML3,PTPN12,JAK1,CPEB2,DCP2,ITGA6,CCDC88A,GALC,GNG2,TGFBR2,EIF4G1,ZNF644,MBNL1,B4GALT1,RHOC,DDX3X,TOP1,RHOB,FCHO2,TBC1D4,YWHAZ,ETS2,PDGFC,CHD4,NFAT5,WSB1,STK10,ITPRID2,TMOD3,AKR1C1,MMP14,SMG1,ZBTB38,RAB35,TNKS2,SQSTM1,ATP2B1,ITGB3,ARF3,TFRC,MALAT1,UBE2F,STRN,BCL2L1,RNF19A,AFF4…	7.EMPP	NormalvsGATA1s	3115
REACTOME_RNA_POLYMERASE_II_TRANSCRIPTION	6.73632	1e-50	1.69568181818182e-48	1292	ITGA2B,GATA1,SLC2A3,TGFB1,ELL2,MEF2C,AUTS2,NR4A2,MAX,PRKCB,POLR2A,YES1,CTNNB1,TXNIP,TP53INP1,CITED2,STAT1,MT-CO1,RUNX1,PRKCQ,U2AF1,CNOT2,CTDP1,NCOR1,MAML3,SMAD3,NFE2,ZNF273,SRSF7,TP53BP2,PPP2CB,CCND3,PTPN1,MT-CO2,ING5,SREBF1,FKBP5,CDKN2A,TP53RK,NRBP1,GP1BA,YWHAZ,PBRM1,UBE2E1,ARNT,CHD4,ELF2,YWHAB,CREBBP,FURIN,THOC1,WWP1,TXNRD1,ZNF440,CR1,NR4A1,SMYD2,GTF2E2,CDC73,ITCH,INTS1,ZNF641,NR1H2,TFDP2,CTR9,…	7.EMPP	NormalvsGATA1s	3114
WAKABAYASHI_ADIPOGENESIS_PPARG_RXRA_BOUND_8D	6.73517	1e-50	1.69568181818182e-48	830	DLC1,ARMC8,CD36,ABCC4,ASAH1,LUZP1,LTC4S,ANXA1,ZMYND8,TXNIP,HSPA5,LMBRD1,CST3,NID1,PFKL,ACSL3,STAT1,CD151,BMP2K,NET1,LMNA,IFRD1,FADS2,RPN1,TMEM87A,ADIPOR2,CTNNBL1,REEP5,TANK,PTTG1IP,LNPEP,MBNL1,EHBP1L1,CREB3L2,PNPLA8,BSG,ABCD3,GSN,TUBB4B,NDEL1,KLF11,YPEL5,EFR3A,ESYT1,GNAI2,YWHAB,TNPO3,LRRC8D,SLC19A2,ZBTB38,PTBP1,ITSN1,HSP90B1,DYNLRB1,SMYD3,ZNF326,CDK13,ABI1,ZNF655,RABEP1,MAMDC4,MBD6,STK3,OXSR1,STA…	7.EMPP	NormalvsGATA1s	3113
IVANOVA_HEMATOPOIESIS_LATE_PROGENITOR	6.73137	1.8188229121309e-44	1.61528796720197e-42	501	RABGAP1L,HDC,BMP2K,PRKAR2B,SPTLC2,PSTPIP2,TYROBP,ATP9B,GALNT10,HBS1L,PACSIN2,HECTD4,ZEB2,ORC4,SLC25A21,FNIP1,MAP2K4,USP14,NPTN,UGGT1,FNDC3B,MAPK1,R3HCC1L,USP24,UBAP1,NCOA4,ASAP1,ANKRD28,SEMA4D,WRN,GBE1,CEMIP2,ABHD5,PPP2CB,MAP2K1,GSR,UBE2Q1,WDR7,TACC1,TFRC,GGNBP2,KPNA1,GMIP,SGK3,HCST,PIEZO1,ATP6V0E1,CEP350,IPMK,SSH1,TMEM165,ANKRD12,EXOC6,TASP1,BCAP29,BSG,GPR89A,PLEK,ATF6,RAB7A,EXOC5,CSF2RB,TMEM50B…	7.EMPP	Trisomy21vsGATA1s	3242
REACTOME_ADAPTIVE_IMMUNE_SYSTEM	6.72937	1e-50	8.77529411764706e-49	808	LAT,HERC2,CYBA,PRKN,TYROBP,ZBTB16,HSPA5,PTPRC,RNF182,DNM3,CD4,HCST,PRKCB,B2M,YES1,HLA-A,LYN,PDIA3,HLA-B,PJA2,KIFAP3,FYB1,YWHAZ,TPP2,CTSA,HLA-C,TAB2,CDC42,PTPN6,UBR4,ITGB1,PTEN,PIK3CA,TUBA1C,ITCH,UBE2H,NFKBIA,NCF4,RNF19A,MAP3K8,REL,LCP2,CTSH,UBC,CALR,CLTC,PIK3CB,UBE2Q1,NPEPPS,TRIP12,CUL3,NFKB1,AP1G1,SMURF1,CAPZB,MKRN1,AP1S2,SYK,UBA6,TRAF6,PPP3R1,LNPEP,BTBD1,NFATC1,PRKCQ,KRAS,HUWE1,RICTOR,FBXW7,CAP…	5.EryP	Trisomy21vsGATA1s	3693
JIANG_MELANOMA_TRM6_CD8	6.72884	3.29222993741703e-36	1.94973172960364e-34	139	RPS4X,RPS26,IFITM2,GAPDH,EEF2,RPL7A,IFITM1,GNA15,RPLP0,APRT,RPL10,ACTG1,LGALS1,LSP1,RPL28,GMFG,NOP53,RACK1,RPL29,CORO1A,CLIC1,LAT2,EIF3F,ARPC1B,CLTA,RPSA,BTF3,RPS12,EIF3I,RPS2,ARPC3,RAC2,ABRACL,RNH1,PLP2,RBM3,CRIP1,NACA,RILPL2,PSME1,ANXA6,MYO1G,PSMD8,PDLIM2,EEF1B2,ARPC5,ATP5PB,GLUD1,PRR13,PLEK,PPP1CA,KXD1,REEP5,ATP5F1C,IFITM3,MYL6,RPL10A,PDLIM1,EIF4E2,PHF5A,CD47,PYCARD,NPC2,ANXA2,CORO1B,AP2S1,ARL…	6.EryMeg	NormalvsTrisomy21	3019
WP_VEGFAVEGFR2_SIGNALING	6.72874	2.34469460746215e-45	1.66562638829144e-43	428	TMSB4X,VCL,NR4A2,STAM,LRRFIP2,PRKCB,PDE4DIP,BSG,C15orf39,IQGAP1,EPB41,STAT1,TPM3,TXNIP,HERPUD1,RHOC,CDC42,PTPN6,ITGB1,CTNNB1,PIK3CA,HDAC5,TUBA1C,ITCH,MYH9,NFKBIA,TMOD3,NUMB,CALR,CTNND1,ALDOA,EIF4G2,MEF2C,RBM39,CLTC,SDF2L1,SH3BGRL3,QKI,EZR,NFKB1,CAPZB,CREB1,CTNNA1,MAP2K4,NFATC1,CLIC1,NAPA,EIF2AK3,RICTOR,ANXA1,TPP1,MAPKAPK2,PTPN1,ROCK2,JAG1,MAP2K1,PRRC2C,MAP2K3,GSK3B,PIK3R1,PPP1CA,ARNT,SDCBP,MAPK8,…	5.EryP	Trisomy21vsGATA1s	3692
WANG_LMO4_TARGETS_DN	6.72722	2.73426565772478e-40	2.08194799366758e-38	347	B2M,DUSP23,IQGAP1,ACTR2,ATP6V0E1,U2AF1,PSAP,LXN,C17orf49,FUT8,PDK3,PIK3CB,NRBP1,NEAT1,CPEB2,TMOD3,CDC42,TRIP12,RABGEF1,RAB14,RNFT1,IRF9,HLA-B,CTNND1,PAK2,BCAP29,RDX,INSR,UBR4,EXOC4,AP3B1,SRGAP1,USP8,ATAD2B,SRA1,CAPZA2,ITCH,PDZD8,ATP6V1C1,TOP1,CHMP4A,WDR41,PLEKHB2,SH3GLB1,MACC1,UBA6,BZW1,SAR1A,SCFD1,RNF181,PHF6,KATNBL1,RRN3,DYNC1LI2,ZDHHC5,SNX4,CLPTM1,ZNF407,WASL,EXOC3,ARFGEF2,TMEM64,OSTM1,CCDC137…	6.EryMeg	Trisomy21vsGATA1s	3110
GOBERT_OLIGODENDROCYTE_DIFFERENTIATION_DN	6.72564	1e-50	1.24366666666667e-48	1065	DNM3,SLC2A3,EMP3,MBOAT2,CNRIP1,CD9,ACTB,PLXDC2,SPTLC2,RABGAP1L,DBN1,RHOBTB3,MAP3K5,PDCD10,VPS50,LTBP1,IFI27L2,WDR1,TXNIP,MALAT1,SLC22A23,DIPK2A,CCL5,PROS1,TNFSF9,SPECC1,ELF1,C21orf91,TMBIM1,ZMYND8,ARPC1B,PDLIM7,DENND6B,SNRPD3,PLEKHG1,FYN,PDK1,SERPINI1,PRKCQ,STAT1,SLC44A1,USP20,NOL4L,CPEB2,MBOAT1,PDGFC,LMBRD1,BNIP3,TP53INP1,AGPAT4,HDAC5,ARL4A,FOS,NINJ2,STRN,EFCAB14,RASGEF1B,CASP6,KIAA0930,AP1S2,TA…	6.EryMeg	Trisomy21vsGATA1s	3109
Shastri_STAT3_Targets	6.72256	1.04498482056795e-36	6.89874934640434e-35	149	LINC00534,GNAQ,RABGAP1L,FER,CDYL,AIG1,MAML3,KIAA1109,QKI,CCDC91,AHCYL2,GLS,ARHGAP15,PLD1,HERC1,ITPR1,ANKRD11,SPIDR,GPATCH2L,MON2,OXSR1,MICU1,SETX,SS18,UBE2K,ANKMY2,MAP2K1,ARFGEF1,CUX1,NSMCE2,INO80,EPG5,SMG6,ATE1,ASCC3,PCYT1A,SKAP2,ATF6,INO80D,PLA2G4A,PIK3C2A,VPS13C,VPS41,SYCP2L,MKNK1,ZNF609,ABLIM1,CNTRL,ANAPC10,POLA1,LCP1,DNAJC13,ENOX2,MAPKAP1,EHBP1,SLC9A8,ELP3,ACSL4,UNC13B,LIN52,CLEC16A,KIF1B,YL…	7.EMPP	Trisomy21vsGATA1s	3241
BENPORATH_NANOG_TARGETS	6.71845	1e-50	1.1134328358209e-48	958	RYR3,APLP2,SGMS1,MBOAT2,JARID2,DHRS3,ASAH1,ZFP36L1,SEMA3C,ITGB1,SLC40A1,SMAD3,CDYL,ELL2,AP3B1,RNF24,EXOC4,ZFAND6,HSPA5,GLG1,IGF2BP3,EIF4G2,NFAT5,NCOR1,INF2,ABHD2,DDX17,GPC4,SCAF4,AP1G1,STXBP2,SLC7A5,S100A11,ZEB2,PICALM,STRN,MEF2A,ATP6V1A,GNPTAB,ANGPT1,JPT1,PTPN1,RIPK1,TRIM24,E2F3,MYEF2,CITED2,CHD2,TXNRD1,SLC44A1,DNM2,TNRC6A,SENP2,TMEM245,EIF2AK3,RAB3GAP2,DIDO1,CELF2,POU2F1,USP3,ANKMY2,UBAP2,ARIH1…	7.EMPP	Trisomy21vsGATA1s	3240
OSMAN_BLADDER_CANCER_DN	6.71372	3.80343971437312e-44	2.62683859532492e-42	404	ZFP36L1,CELF2,NCOA4,COL18A1,MYO1F,RABGAP1L,EPB41,SEPTIN6,FMNL1,RPS10,GNAS,TGFBR2,PRMT2,RNF216,SERTAD2,PPTC7,PRKAR1A,CHD2,NFATC1,GATAD2A,MYL12A,MLXIP,HIVEP2,SIAH1,SDE2,GPBP1,GABARAPL1,RBM4,CSDE1,OGT,RIPK1,NAA10,MDM4,RBM33,CLIP1,RALGPS2,STX7,SKAP1,DIDO1,ATL2,SIK3,EPC1,USP7,CHMP3,KMT5B,PUM1,CDK12,NINJ1,TRIM38,SP110,PABPN1,STAT3,GRIPAP1,SAMD4B,TNKS,SMARCC1,STRBP,ELL,PHF1,OGA,TMEM41B,IDS,CELF1,TOX4,MP…	5.EryP	Trisomy21vsGATA1s	3691
JIANG_MELANOMA_TRM1_CD8	6.71324	6.74507268305921e-34	6.37110536215036e-32	174	FTH1,AREG,ZFP36L2,EIF1,TSC22D3,DDIT4,NR4A1,SRSF7,RGS1,SARAF,SRGN,FOSL2,ZFP36,NR4A3,VIM,NFKBIA,IER2,TUBA1B,BTG1,SYAP1,JUNB,ANXA1,DNAJB1,FOSB,DUSP2,UBB,EIF5,TNFAIP3,HSPA8,JUN,BTG2,FOS,WSB1,SOD1,JUND,DDX3X,CXCR4,PIK3R1,SELENOK,PDE4B,DUSP1,DNAJB6,AHNAK,SERTAD1,NFKBIZ,TUBB4B,FAM177A1,STAT3,LEPROTL1,HSP90AB1,CHMP1B,CITED2,BRD2,KDM6B,RPL22L1,CALM2,GADD45B,TAGLN2,CREM,SAT1,MYADM,IDS,FUS,RASGEF1B,MCL1,DNA…	7.EMPP	NormalvsTrisomy21	2772
KINSEY_TARGETS_OF_EWSR1_FLII_FUSION_UP	6.71317	1e-50	1.24366666666667e-48	1250	PLP2,CLEC11A,ANKRD9,ACTB,PLXDC2,IGF2BP1,RNF182,IL1RAP,HIGD1A,ACTR2,GPD2,PRKCB,DIPK2A,CALM1,SLC43A3,SLC25A21,ARPC5,ARPC2,PTBP3,CMAS,DNAJB6,UBR3,RCOR1,VPS29,RANBP9,EPB41,NET1,KIF2A,NUDT4,RAB8A,OSBPL3,AMMECR1,TUBB2A,YWHAH,MT1F,NMI,RAC1,RAB14,XPNPEP1,SELENOT,MPDU1,DCP2,CDYL,CCND2,PAK2,SPPL2A,CMPK1,ORMDL1,SSH1,BMP2,ATG5,HNRNPF,NCKAP1L,FLI1,STAU2,CAPZA2,OGFRL1,PRKD1,UBR1,CKAP5,KPNA1,NEDD4,ANP32A,PRUNE1…	6.EryMeg	Trisomy21vsGATA1s	3108
BENPORATH_SOX2_TARGETS	6.70988	1e-50	8.77529411764706e-49	717	ZFP36L1,MTSS1,STXBP2,SGMS1,SMAD3,JARID2,HSP90B1,DHRS3,TPM3,SEPTIN6,SLC7A5,AP3B1,SPAG9,DDX17,RNF24,ARIH1,UBC,CALR,MAGED2,SCAF4,EIF4G2,RBM39,SGK3,ARF3,ARID4B,PRNP,ZNF217,SUSD6,TXNRD1,TRA2A,ODF2L,NUFIP2,TRIM24,NBAS,OBSL1,TALDO1,AUH,PRKAR1A,ADAR,E2F3,HUWE1,PPP1R15A,MORF4L1,IGF2BP3,ATF3,VASP,DNM2,GNPTAB,GGA1,AKIRIN2,SDE2,TBL1XR1,NUDT4,DDX5,ARID1B,INO80D,PPM1B,GSK3B,SENP2,OGT,PIP5K1C,RIPK1,ZNF664,BMP2,…	5.EryP	Trisomy21vsGATA1s	3690
GINESTIER_BREAST_CANCER_ZNF217_AMPLIFIED_DN	6.70279	2.40209792349853e-42	1.53138875310902e-40	326	CYBA,TLN1,LMNA,CDC42SE1,CALR,CTNND1,B4GALT1,LIMD2,SRRM2,TSPAN14,PBX2,FURIN,GATAD2A,GGA1,TICAM1,TCF3,LENG8,MYO9B,RBM33,MEF2D,LPAR2,LRCH4,KHSRP,DCAF8,PHF21A,INTS1,R3HDM4,SETD5,PPP6R2,BRD1,PABPN1,MCTP2,GRIPAP1,DCLRE1C,NEU4,PRRC2A,SH3BP1,ZBTB5,GRAMD4,RBBP6,RAP1GAP2,NUP214,ARHGAP17,REXO1,CIC,TRRAP,TNK2,SMG7,KHDC4,ACIN1,SRCAP,STK11,TTC17,KMT2D,SAFB2,PIP5K1A,ARHGEF11,NCKAP5L,ANKRD13D,MARK2,HDAC10,CSNK1G…	5.EryP	Trisomy21vsGATA1s	3689
GRAESSMANN_APOPTOSIS_BY_DOXORUBICIN_UP	6.70185	9.36053149330126e-42	1.34323626928873e-39	1112	AREG,EGR1,GNA15,CIRBP,NR4A1,ALDH1A1,ZFP36,CCS,SF3A1,BTG1,JUNB,DNAJB1,CORO1A,FOSB,JUP,SOX4,ERGIC3,CSF1,BTG2,EIF1AX,FOS,INPP5D,CSTB,WSB1,ITM2C,PNPLA2,ATP6V0C,MARCKSL1,CXCR4,CAPG,SEPHS2,AHNAK,TUBB4B,PLK3,MAN2B1,CAPN1,PML,FAM32A,NFKBIE,F11R,ADA,MOAP1,BST2,TWF2,LGALS9,PHYKPL,RTRAF,ZNF593,CAVIN1,NCOA4,POLR2A,PNP,LITAF,CHMP1B,CITED2,PATZ1,CTR9,NAPA,UBA7,FOSL1,JAK3,MYD88,ADAM8,SHMT2,IFNGR2,CDIPT,SMOX,EMC…	7.EMPP	NormalvsTrisomy21	2771
PUJANA_BRCA1_PCC_NETWORK	6.70097	1e-50	1.1134328358209e-48	1557	KYNU,ITGA2B,ZNF804A,RABGAP1L,TGFB1,STK24,KMT2C,JARID2,ELF1,MAX,PIK3CB,MBNL1,U2AF1,RREB1,GYPE,PDCD10,RCOR1,PTBP3,IL2RG,AP3B1,EPB41,RANBP9,IGF2BP3,BTAF1,ACTR3,TOP1,ATAD2B,GPD2,CBFA2T3,ACTR2,PDK1,OSBPL3,AP1G1,ATF2,SLC7A5,CDC14A,TPP2,ZC3HAV1,TFDP2,DCP2,CDK13,BRAF,STRN,RUNX1,SCFD1,SP100,PTEN,CENPC,ABI1,USP34,ZNF273,TOP2B,PTPN1,TRIM24,RNGTT,TMEM131L,TEC,UBE2E1,MTR,CAPZA1,E2F3,PSME4,R3HCC1L,HPS1,ARFGEF2…	7.EMPP	Trisomy21vsGATA1s	3239
REACTOME_ASPARAGINE_N_LINKED_GLYCOSYLATION	6.69876	2.056597185234e-42	1.32242744867762e-40	297	CD55,PDIA3,ANK1,TRAPPC10,CTSA,ANKRD28,NPL,TUBA1C,UBC,TFG,CALR,B4GALT1,ARF3,VCP,RAB1A,CTSZ,SEL1L,CAPZB,RPN1,PPP6R3,TMED7,NUS1,NAPA,CAPZA1,SCFD1,SPTA1,COPA,TRAPPC1,DCTN1,GOLGB1,COG5,MAN1A2,SEC24B,STX5,PPP6R1,MAGT1,SEC31A,ARF4,MGAT5,DERL2,FUCA1,DCTN4,TUBA1A,ARF1,SYVN1,CSNK1D,ST3GAL2,TRAPPC9,DYNC1LI2,NEU1,DYNC1I2,TUBB2A,ARFGAP1,NAPG,TMED9,TUBB4B,NGLY1,OS9,NEU4,MAN2A2,RAB1B,NSF,GBF1,DYNC1H1,SEC23A,SPT…	5.EryP	Trisomy21vsGATA1s	3688
REACTOME_MEMBRANE_TRAFFICKING	6.69562	1e-50	1.165e-48	620	TUBA1C,STON2,RHOBTB3,AGPAT3,CD4,DNM3,KIFAP3,ACTR2,CD55,TRAPPC10,TRAPPC1,ARPC2,ARPC3,STAM,ARF3,HPS1,CTSZ,RAB5C,PACSIN2,PPP6R1,ANK1,NAPA,TUBB4B,RABGEF1,DNM2,AP1G2,RIN3,DCTN1,TMED9,RAB8A,MYH9,CAPZB,RALA,AP1S2,TFG,FNBP1L,ITSN1,HSPA8,DENND6B,ARPC5,GJA4,YWHAH,RAB1B,SYTL1,CTSC,AP2M1,RAB11B,PLIN3,FTL,GGA1,UBC,PIP5K1C,AP3B1,ANKRD28,TGOLN2,HGS,SYNJ1,ACTB,VPS28,LNPEP,COPE,TMED7,FCHO2,MAN2A2,ARFGAP1,VPS37A,D…	5.EryP	NormalvsGATA1s	3628
NUYTTEN_NIPP1_TARGETS_UP	6.68817	2.29977382639164e-46	2.41702990035696e-44	721	CNRIP1,ARMC8,YWHAZ,RABGAP1L,RSU1,IL1RAP,CHD7,GNAQ,EPHA3,KLF6,TNIK,PROS1,PDK1,SERPINI1,STAT1,PTP4A2,PDGFC,ARHGAP12,JPT1,BNIP3,RPS6KC1,TTC7B,NMI,ARPP21,PTPN12,SP100,PLD1,SERPINE1,TBPL1,NUMB,BEX1,RASGRP3,QKI,C4orf33,IL15,RBM41,SLC25A12,ELL2,MFSD1,TEC,TMEM9B,DGKD,MLF1,GAD1,ADAT2,ZC3HAV1,UBR1,FAM3C,VPS13B,MPP7,MOB1A,KDM4C,STAT2,WDR41,PLEKHB2,MACC1,P4HA1,SAR1A,FYTTD1,PTPN1,PTGS2,CRYZ,GLS,PITPNB,CA13,KB…	6.EryMeg	Trisomy21vsGATA1s	3107
REACTOME_ASPARAGINE_N_LINKED_GLYCOSYLATION	6.68814	1.54983292907986e-39	1.19193336607585e-37	297	ANK1,CD55,SPTA1,FUT8,TRAPPC10,PDIA3,NPL,MAN2A1,TUBA1C,NGLY1,TFG,SCFD1,COG5,RPN1,CTSA,TRAPPC9,UGGT1,CAPZA1,B4GALT1,NUS1,ANKRD28,TUBB1,MGAT5,PPP6R3,SEC31A,ST3GAL3,RAB1A,NSF,GOLGB1,CAPZB,CTSZ,MAN1A2,SEL1L,VCP,B4GALT5,GBF1,STX5,GMDS,MAN1A1,DCTN4,CMAS,COPA,CAPZA2,SEC24B,HK1,NAPG,UGGT2,ARF4,ARFGAP1,SEC24D,TRAPPC6B,ARF3,ARFGAP3,DYNC1I2,FUCA1,TMED7,PPP6R1,MAGT1,GFPT1,TUBB2A,ST3GAL2,MIA3,DCTN1,SEC16A,RENB…	7.EMPP	Trisomy21vsGATA1s	3238
GRYDER_PAX3FOXO1_ENHANCERS_IN_TADS	6.68481	1e-50	8.77529411764706e-49	990	IRX1,CRPPA,STXBP5,MEIS2,HERC2,IL1RAP,MYO18B,CHD7,DNAJB6,PTTG1IP,NLGN1,ZFP36L1,STK24,DNM3,AUTS2,CELF2,LRRFIP2,ZNF804A,PDE4DIP,COL18A1,TFPI,ZFAND3,SGMS1,MED13L,JARID2,YWHAZ,TPP2,PDGFC,ARPC2,CD9,TAB2,TGOLN2,RPS6KC1,OAZ1,ATP9B,ITGB1,GNAS,SPRY1,HDAC5,MYH9,F11R,STAG1,ATAD2B,BTAF1,ZMIZ1,RNF216,MAGED2,ARHGAP12,SETX,QKI,CCNY,EZR,HSPG2,ITSN2,CUL3,ELMO1,HP1BP3,GSE1,ZNF217,SNX29,AGAP1,TXNRD1,UBR3,SERTAD2,SYT…	5.EryP	Trisomy21vsGATA1s	3687
WANG_RESPONSE_TO_GSK3_INHIBITOR_SB216763_UP	6.68255	2.3066981332627e-43	1.56415103418241e-41	348	ASAH1,MALAT1,PTPRC,PLXDC2,CD4,PRKCB,B2M,PSAP,ZFAND3,FYB1,RSRP1,AGTPBP1,KMT2C,ITCH,NCF4,F11R,CTSH,CPEB4,HPS1,CTNND1,ZMAT3,CD68,ELMO1,CD84,ATP6V1A,TRA2A,WASHC2C,PSTPIP2,TET2,CHD2,LAMP1,ARHGAP15,FOXN2,ANXA5,ZFYVE16,ARNT,PLD1,NFKB2,FRRS1,CLN8,ATG16L2,TRAK2,LPAR2,AHCYL2,STAC3,SENP7,SDCCAG8,STAT2,PHF21A,ST3GAL2,AP1G2,PLD3,CTSS,NEU1,SNRPN,TRIM38,ZNF641,RPRD2,SCAPER,RCAN3,ORMDL1,PROS1,RASGRP4,EVI2B,SSBP2…	5.EryP	Trisomy21vsGATA1s	3686
JIANG_MELANOMA_TRM5_CD8	6.68191	1.38790983945852e-39	8.08782772853211e-38	187	TGFB1,KLF6,TESC,MALAT1,NR4A2,IL2RG,HSPA5,ZFP36L1,CTSW,GSTP1,SQSTM1,PDIA3,LMNA,HSP90B1,NDFIP1,KLF10,FOSB,ITM2B,YWHAZ,CSRNP1,HERPUD1,MYH9,GADD45B,NFKBIA,ATP2B1,UBC,B4GALT1,ALDOA,STK17B,PNRC1,FOS,KDM6B,PRKAR1A,ZFP36,AKAP13,PPP1R15A,ANXA1,ATF3,PPP1R16B,HIVEP2,CITED2,DUSP1,GNB1,IER2,PIM1,PFN1,ICAM1,CCND2,RGCC,CHD4,IFNGR1,CAPNS1,NFKBID,TNFAIP3,PLD3,ACTB,PDIA6,IFNAR1,WNK1,IFRD1,WSB1,ORAI1,RAPGEF6,NR4A1,…	5.EryP	Trisomy21vsGATA1s	3685
EPPERT_PROGENITOR	6.67847	9.03437179991426e-36	5.56995153945127e-34	134	RHAG,DLC1,ANK1,RYR3,PDLIM1,LRRFIP2,ARMC8,STAM,HDC,KIFAP3,PRKAR2B,TNIK,CNRIP1,CTNNBL1,SPTA1,FAM171A1,RFX7,PDZD8,NET1,HBS1L,TMOD3,XK,ANKRD27,PSMD1,DNAJC6,TM9SF3,TXNRD1,P2RY1,CKAP5,EIF2AK1,WRN,BTK,MTREX,HS2ST1,TPM1,MSH3,TFRC,PHF6,IDE,SSX2IP,FECH,TAL1,CSNK2A1,MTMR2,LANCL2,EIF5B,POLA1,ACO1,METTL14,NCBP1,FKBP14,POLE2,MRE11,TPR,PLIN2,PRKDC,DTL,CDK7,KCNQ5,CALU,BAMBI,NOMO1,ASRGL1,SMC1A,MTPAP,ACSM3,RMDN1,L…	7.EMPP	Trisomy21vsGATA1s	3237
REACTOME_TRANSLATION	6.67621	1.02816907778406e-32	8.62044680721869e-31	275	RPS4X,RPS26,EEF2,RPS3,EIF4A1,RPL7A,RPLP0,EEF1A1,PABPC1,RPL28,RPL10,DDOST,EIF5,RPL19,SEC61B,EIF3F,RPS14,EEF1D,EIF3K,EIF1AX,RPL8,EIF3L,RPL11,EIF3I,RPN2,RPS5,EIF3G,MRPL57,MRPS7,RPL18A,OXA1L,RPL36AL,RPL6,RPS15,RPL18,EIF4H,MRPL10,APEH,RPL29,RPS2,MRPL27,RPSA,TUFM,RPL22L1,EEF1G,MRPS21,SRP9,MRPS24,MRPS2,EEF1B2,RPS7,EIF3D,MRPL9,EIF4G1,SARS2,MRPS27,MRPL54,RPL5,RPL12,MRPL21,SRP19,MRPL46,MTIF3,MRPS22,MRPS17,…	7.EMPP	NormalvsTrisomy21	2770
REACTOME_CELLULAR_RESPONSES_TO_STIMULI	6.67567	1.12733143480404e-50	1.23674889759384e-48	750	MEF2C,MAP3K5,BACH1,TNIK,MT-CO1,DNAJC3,MAP4K4,TLN1,HSPA5,NCOA1,NCOR1,LMNA,TXNIP,ATF2,TUBA1C,NCOA2,TFDP2,FNIP1,DCP2,DNAJB6,MAP2K4,ATP6V1A,EP300,HSP90B1,CYBA,PSMD1,DNAJB11,UBE2E1,MT-CO2,CAPZA1,E2F3,PSME4,FBXL17,MAPK1,CITED2,TXNRD1,GCLC,CREB3L2,TNRC6A,ARNT,SESN1,CUL3,EIF2AK3,TUBB1,NPLOC4,EIF2AK1,CDKN2A,PRKCD,TNRC6B,RANBP2,CREBBP,SEC31A,CLEC1B,GSR,CHD9,RPS10,PARN,FKBP5,EZH2,RPS4Y1,ATP6V0E1,SQSTM1,CAPZ…	7.EMPP	Trisomy21vsGATA1s	3236
RHEIN_ALL_GLUCOCORTICOID_THERAPY_DN	6.67519	5.191878217406e-33	4.40247673389586e-31	361	EGR1,GAPDH,BHLHE40,TKT,LAPTM4B,RPLP0,CD34,RBM8A,CCT8,IGFBP7,TUBA1B,PGD,IGLL1,IMPDH2,FOSB,AKR1A1,LAT2,HSPA8,JUN,FOS,APEX1,PSMB8,AHCY,CCT7,PGK1,ENO1,EID1,NUCB2,ADSL,MARCKSL1,NPM1,PRDX3,TPI1,ADA,STOML2,TALDO1,CFAP298,TUBA1C,PRDX6,HSP90AB1,ATP5F1C,CITED2,TUFM,ATP5PF,IDH2,SHMT2,UBE2L6,HMGB3,SDHC,CLNS1A,CD99,BCAP31,DUT,LDHB,FHL1,CSNK2B,PSMG1,MAGED1,TUBB,ATP9A,CEP68,PSMA6,GPI,ACADM,PIGP,TCEAL4,HNRNPA0,M…	7.EMPP	NormalvsTrisomy21	2769
REACTOME_VESICLE_MEDIATED_TRANSPORT	6.6729	2.3507928776847e-48	3.65401367925116e-46	707	DNM3,ANK1,STON2,CD36,STAM,KIFAP3,CD55,RHOBTB3,TRAPPC10,TUBA1C,FNBP1L,AP3B1,RAB10,CD4,ACTR3,NBAS,RABGEF1,PACSIN2,CLTC,TFG,SPTA1,DNM2,ACTR2,AGPAT3,RIN3,MYH9,VTI1A,SYNJ1,GJA4,PPP6R1,LNPEP,AGFG1,HPS1,CTSZ,CTSC,EXOC4,KIF5B,STAM2,TUBB1,FCHO2,TUBB4B,TBC1D4,RALA,AP2B1,YWHAZ,ANKRD27,NAPG,YWHAB,TRAPPC1,NAPA,PIP5K1C,AP1G1,NSF,EXOC2,COG5,RAB35,DENND6B,ITSN1,ARF3,MAN2A1,HSP90B1,TFRC,AP1G2,SCFD1,RABEP1,GOLGB1,…	7.EMPP	NormalvsGATA1s	3112
KRIGE_RESPONSE_TO_TOSEDOSTAT_24HR_DN	6.67125	3.01737509951188e-40	3.88200913664787e-38	998	RPS26,EGR1,ZFP36L2,IFITM2,LAPTM4B,CA2,SRGN,SLC39A3,SNHG5,IGFBP7,DNAJB1,SOX4,ITM2A,SPRY1,PEBP1,RRP1B,PGK1,SYNGR2,LGALS12,DNAJB6,MRPL57,IMP3,FSCN1,CD81,MYC,MAZ,CLEC11A,SMARCD1,DUS3L,LGALS9,ZNF593,C4orf3,MYLIP,PNP,ARHGDIA,CCDC85B,RRP7A,LSM7,CDK6,MGLL,RPL22L1,MDFIC,FKBP1A,PWP1,GADD45B,MGAT4A,RRP1,P2RY8,ACTR5,NXT1,SNU13,BCL11A,TM7SF3,DDX54,CABLES1,TENT5A,ATP5F1D,EIF4E2,NDUFS3,DUT,ERGIC1,SLC25A32,VAMP8…	7.EMPP	NormalvsTrisomy21	2768
REACTOME_INNATE_IMMUNE_SYSTEM	6.66638	1e-50	1.73279069767442e-48	1031	LAT,FCER1A,LRRC7,ASAH1,S100A11,DNM3,TYROBP,LAMTOR1,CST3,FCGR2A,B2M,VCL,CYBA,SLC2A3,CAPN1,MEF2C,ALDOA,CD36,CD63,CTSA,ATP6V0E1,NCF4,TRAPPC1,CFH,ARPC3,GSTP1,FCER1G,ACTB,PTPN6,PFKL,CD4,BIN2,CYB5R3,ARPC1B,ARPC2,LYZ,TXNIP,ARMC8,CTSZ,LAT2,SERPING1,GSN,PSAP,ACTR2,TMBIM1,HLA-B,PECAM1,IQGAP1,ARPC5,CAP1,RHOA,PKM,VCP,CD55,ATP6V0C,PROS1,PSMD6,CD68,RAB5C,LCP2,BTK,CTSC,NBEAL2,HLA-C,CALM1,RAC2,GMFG,SYK,CMTM6,PGA…	6.EryMeg	NormalvsGATA1s	3177
MULLIGHAN_MLL_SIGNATURE_1_UP	6.65884	1.4530795600063e-41	1.57122124597203e-39	378	FLNA,TRAPPC10,CTSA,FCGR2A,GLG1,CYBA,ATP6V0E1,LGALS1,SLC16A3,DNM2,ACTR2,APOBR,MYO1F,ABHD2,MRTFA,PSEN1,OSBPL8,TANK,SYK,CCND3,IGFBP7,MBNL1,EHBP1L1,B4GALT1,C15orf39,PECAM1,PRKCD,FES,SELPLG,MALT1,OAZ1,P4HB,TNPO3,PTPN2,PCYT1A,FUCA1,SLC43A3,ABHD17A,ADARB1,MICAL1,CALM1,MFSD1,FAM53B,GRN,GRB2,C11orf21,DHRS7B,RAB6A,HSPA1A,KRI1,CLN3,PPIF,TRAF3IP3,LAMP1,INSR,NINJ2,ARPC2,ARHGAP1,ELF4,TBCD,IL10RB,S100A6,MR1,TPP…	7.EMPP	NormalvsGATA1s	3111
THEILGAARD_NEUTROPHIL_AT_SKIN_WOUND_DN	6.64822	2.96542900589145e-37	2.45834064588401e-35	226	MEIS2,TGFB1,ACTN1,GNAQ,EIF4G2,STK24,PPP1R12A,PDE3B,PRKCB,PRMT2,CBFA2T3,USP15,TPST2,MAP3K5,CITED2,NCOA4,INPP5D,IQGAP1,NCOA1,NCF4,CD46,MAP2K4,PHKB,JAK1,NFE2,RIPK1,SELPLG,CDKN2D,GNAI2,ADGRE5,CREBBP,OAZ1,TNPO3,GNAS,FLOT2,ANXA11,TSC22D3,ZNF217,HDAC5,CDK13,RALY,LASP1,CALM1,CAPZB,FEZ2,ACTN4,GTF2B,ROCK1,STAT6,PRKAR1A,TBPL1,CRADD,SPTLC1,ARHGAP1,SPAST,CASP8,NPEPPS,ARHGAP4,SRPK2,APAF1,UBN1,PLCG2,ARPC1B,PPM1…	7.EMPP	NormalvsGATA1s	3110
ENK_UV_RESPONSE_EPIDERMIS_DN	6.64489	3.78641572894297e-42	3.10402871845215e-40	504	HERC2,ABCC4,STAM,JARID2,ZBTB16,CD55,ASAH1,PIK3CB,NR4A2,PRKCB,ATXN7,PTBP3,ELL2,NCOA1,PDGFC,PROS1,LPP,KDM6A,TP53BP2,PACSIN2,SLC7A5,ERBIN,APC,WDR1,DNAJB6,PLD1,HERC1,CORO1C,PTPRA,NDEL1,RSU1,RNF19A,PRDM2,TXNRD1,UBAP1,AFF4,FYN,ATP2B1,UVRAG,EIF4G3,PPP3CA,EIF2AK3,SEMA4D,FRY,OXSR1,LXN,BABAM2,CRY1,NFATC3,FOSB,PRKCD,TDG,CEMIP2,SOS2,ABCD3,RNASET2,USP3,CTSH,KLF11,TFRC,RLF,ZNF217,SPAG9,ANXA1,B3GNT2,HDAC5,ITM2A…	7.EMPP	Trisomy21vsGATA1s	3235
KIM_ALL_DISORDERS_OLIGODENDROCYTE_NUMBER_CORR_UP	6.64479	1e-50	1.73279069767442e-48	740	APLP2,OAZ1,RNH1,CA2,HMGN1,ALDOA,CTSA,CD9,RPS10,PFN1,LY6E,KIFAP3,NCOA4,LGALS1,DMTN,CAPNS1,PPP1CA,GNAS,ARPC2,ILK,DBN1,TALDO1,NUCB1,MAGED2,PSAP,ADRM1,STK24,SNTA1,RPL36AL,FADS2,CAP1,RHOA,ARF3,IER2,EIF4G2,ATP6V0C,ATP5PO,DAD1,AP2M1,VPS28,REEP5,CTDNEP1,PMVK,SERPINI1,DAZAP2,CTSH,SOD1,ESYT1,TSC22D4,COPE,ATP6V0D1,GAPDH,FAM89B,GPX4,SUMO3,GABBR1,ECH1,CIRBP,LGMN,TAF10,CFL1,BCAP31,CCDC92,SEC11A,PIP5K1C,DDOST,O…	6.EryMeg	NormalvsGATA1s	3176
NUYTTEN_NIPP1_TARGETS_UP	6.63537	1.62414315858631e-49	1.70649407930336e-47	721	GNAQ,ARMC8,RABGAP1L,IL1RAP,CHD7,TNIK,ELL2,EPHA3,CNRIP1,VPS13B,YWHAZ,RPS6KC1,PDGFC,STAT1,NUMB,CDC42SE2,PROS1,PDK1,UBR1,FAR1,KDM4C,TCF12,CDC14A,ARHGAP12,QKI,PTPN12,ZC3HAV1,KLF6,GLS,ESCO1,PLD1,SP100,TANK,RBM25,JPT1,PTPN1,TEC,RSU1,ARPP21,CCDC88A,PLEKHB2,TTC7B,WDR41,MPP7,TNRC6B,RASGRP3,CCNT2,SAR1A,TENT2,HS2ST1,ARFGEF1,SERPINI1,DGKD,BNIP3,GOLGA4,OGT,TBPL1,IL15,IMMP2L,ADAT2,ATL2,RBM26,BCKDHB,ZDHHC21,LAR…	7.EMPP	Trisomy21vsGATA1s	3234
PARENT_MTOR_SIGNALING_UP	6.63521	1.10520014810739e-43	9.47677368377137e-42	548	EPB41L4A,MAP3K5,NBAS,ZMYND8,DNAJC3,AP3B1,RANBP9,CTNNB1,IQGAP1,GLG1,LTBP1,USP47,STAT1,PDK3,BCAS3,TFPI,TANK,FAF1,JAK2,USP34,PTPRA,CTNND1,ATF7IP,NSD1,RNGTT,TBC1D22A,AMBRA1,NPEPPS,CTDP1,CITED2,ARNT,CPQ,PPP3CA,CBLB,PIAS1,PCCA,TNRC6B,VPS13D,HELZ,RDX,CD63,MYO1D,CTBP2,CHD4,ATXN7L1,PIP5K1C,DHX9,OXR1,MSH3,PDE4DIP,ANO10,SPAG9,GPHN,ATP6V0E1,CEP350,COMMD10,ODR4,RAB3GAP1,PRKAR2A,DIP2A,SKAP2,GBF1,PRIM2,CDK12,TH…	7.EMPP	Trisomy21vsGATA1s	3233
NUYTTEN_EZH2_TARGETS_UP	6.62847	1e-50	1.69568181818182e-48	999	MEIS2,ANK1,ARMC8,BACH1,APLP2,ZFP36L1,GNAQ,SGMS1,MAX,FYB1,SLC9A9,DNAJB6,ANXA1,USP15,CNRIP1,JARID2,GLG1,PIK3CB,TXNIP,ARHGAP21,RPS6KC1,ACTR3,HSPA5,JPT1,STAT1,VEZT,TRIM58,SP100,PDK1,WDR1,TNIK,TFG,WWC2,FUT8,SLC16A3,TMEM87A,ADIPOR2,AGPAT3,CPEB2,HERPUD1,CCDC88A,TANK,CPQ,MORC3,TP53BP2,LNPEP,PTPN1,TGFBR2,JAK2,DCBLD2,CTSC,BLZF1,NCOA3,DNAJA1,RASGRP3,C15orf39,RHOC,FCHO2,ZC3HAV1,MAP2K1,KDM4C,YWHAZ,ETS2,MIR22H…	7.EMPP	NormalvsGATA1s	3109
YAGI_AML_FAB_MARKERS	6.62296	1.9780583225434e-36	1.26122351163879e-34	193	RHAG,DLC1,ITGA2B,LDLRAD4,MYO16,RYR3,GP9,VCL,KEL,TRPC6,GP1BB,ZBTB16,CFH,CDC42BPA,MAX,NR4A2,ZMYND8,MAST4,PDCD10,ELL2,IL2RG,GABRE,ADAMTS3,LAMA5,TPST2,NET1,PROS1,VPS13A,CTSW,TFDP2,USP8,ELOVL6,CD164,FAM20B,S100A10,TXNRD1,CD68,GJA4,ULK2,CLCN4,NCAM1,MED21,AKR1C1,ITGA6,GP1BA,RUNX1T1,SERPINI1,ITGB3,TPM1,PIR,TBPL1,PIM2,MAN1A1,SNTA1,CFP,CSF2RB,ANXA5,PTPN4,KIF2A,AOAH,CD58,GAD1,ANXA2,SERPINH1,ITSN2,DLEU1,ACO1…	7.EMPP	Trisomy21vsGATA1s	3232
HSIAO_HOUSEKEEPING_GENES	6.62169	6.23685838585159e-44	4.94702299201164e-42	384	PDLIM1,FLNA,TMSB4X,GSTP1,CD63,APLP2,TXNIP,HLA-B,CD164,MSN,TAGLN2,B2M,PLP2,ZFP36,PTPN6,CST3,PSAP,NFKBIA,OAZ1,CYB5R3,CAPNS1,HLA-A,SQSTM1,S100A10,GNAS,IQGAP1,ARPC2,SON,DUSP1,JUNB,CLIC1,LAMP1,ARF3,ALDOA,PIM1,LGALS1,ANXA11,ARHGDIB,OS9,PFN1,RPS10,ILK,MYH9,CIRBP,EIF4G2,TAX1BP1,TLE5,TMBIM6,CD34,YWHAH,DAZAP2,ANXA2,CTNNB1,BCAP31,FTL,UBC,TMSB10,FUCA1,GLUL,PGK1,PSEN1,ARAF,ACTB,BTG2,RPN2,DDX5,COMT,ARF1,EZR,EI…	5.EryP	NormalvsGATA1s	3627
ONKEN_UVEAL_MELANOMA_UP	6.61744	1e-50	1.165e-48	778	PDLIM1,MEIS2,HERC2,TYROBP,S100A11,COL18A1,NR4A2,HLA-B,CHD7,MSN,TAGLN2,B2M,SLC2A3,ETS2,PSAP,LAMA5,CD55,PDE4DIP,IGFBP7,RHOB,EMP3,GNAS,IQGAP1,HACD1,TRAPPC10,SH3BGRL3,STAT1,ARPC2,LAPTM5,LDLRAD4,CALR,PTGER4,STAM,TPST2,MTSS1,PTGS1,FCER1G,CELF2,CTSH,LGALS1,ANXA11,TSC22D1,IRF9,ELOVL6,NFIL3,SMAD3,MACF1,STAT6,PFN1,AP1G2,AGAP1,MCM3AP,RIN3,LY6E,ATP2B1,RABGAP1L,PKM,ADGRE5,SOD2,MFSD10,ZMYND8,MTCL1,LYN,ZFP36L2,…	5.EryP	NormalvsGATA1s	3626
THEILGAARD_NEUTROPHIL_AT_SKIN_WOUND_DN	6.61485	1.36797852906571e-36	8.95185949721945e-35	226	MEIS2,GNAQ,TGFB1,STK24,PPP1R12A,ACTN1,MAP3K5,PDE3B,PRKCB,USP15,PHKB,CD46,IQGAP1,NCOA1,EIF4G2,TPST2,CBFA2T3,PRMT2,MAP2K4,CDK13,JAK1,RIPK1,NPEPPS,CITED2,ADAM10,NCOA4,CREBBP,CELF2,DHX9,ROCK1,NFE2,TNPO3,PPP1R12B,ZNF217,SRPK2,HDAC5,SPAST,OGT,CAPZB,TBPL1,GSK3B,NCF4,INPP5D,MTMR3,OAZ1,DOCK2,CDKN2D,NUP214,PPM1A,RO60,CRADD,UPF1,FLOT2,APAF1,KLC1,LASP1,RASA1,SPTLC1,PHKA2,NUP153,PPFIA1,ADGRE5,RALY,SELPLG,CALM…	7.EMPP	Trisomy21vsGATA1s	3231
MITSIADES_RESPONSE_TO_APLIDIN_UP	6.61013	3.97041259638096e-41	3.15098701797893e-39	420	LDLRAD4,SLC2A3,JARID2,PIP5K1B,CD84,BACH1,PDE3B,YES1,TIMP1,SMAD3,TESC,ATAD2B,FBXO34,MAP4K3,WDR26,DENND4A,CDC14A,KLF6,DNAJB6,RUNX1,MORC3,CENPC,POLR2A,NDEL1,TNFSF9,ATF7IP,JAK1,TUT7,SLC35F5,SUSD6,TRIM33,ATP6V0A1,EIF2AK3,FOSB,CCNT2,IFRD1,CCNL1,USP20,ARIH1,STK17A,TTC17,PLEKHM1,ATP6V0E1,SQSTM1,ATP1B3,NFE2L2,ODR4,SNRK,RIOK3,MBTPS1,MIR22HG,PIGA,KDM3A,STX5,UBE2H,ARID3B,DMTF1,PDE8A,AKAP8L,HERPUD1,RBMS1,STK1…	7.EMPP	Trisomy21vsGATA1s	3230
PARENT_MTOR_SIGNALING_UP	6.60521	3.39508021482746e-43	2.84652680483624e-41	548	CD63,IQGAP1,MAP3K5,LTBP1,ATP6V0E1,EPB41L4A,GNAS,PTPN6,TMBIM6,ZMYND8,PDK3,CITED2,NBAS,STAT1,GLG1,PRKAR1A,RANBP9,DNAJC3,TFPI,PIP5K1C,PCDH9,PECAM1,ARNT,AMBRA1,NRDC,CPQ,HECTD3,PTPRA,SKAP2,MYO1D,CTNND1,RDX,SYNE2,EIF3C,JAK2,PDE4DIP,ZER1,AP3B1,SULT1A2,PYGL,NCKAP1L,UBL4A,SP110,NSD1,PRKD1,CHD4,RECQL,PTPN18,DIP2A,PRUNE1,IRAK4,OXR1,MADD,RAB5B,TSC22D3,ATXN7L1,FAF1,CTNNB1,SURF1,NPEPPS,ANO10,HDAC6,PTBP1,TBC1D9…	6.EryMeg	Trisomy21vsGATA1s	3106
BENPORATH_MYC_MAX_TARGETS	6.60403	1e-50	8.77529411764706e-49	738	CYBA,TMSB4X,ASAH1,SPTLC2,CD164,ABCC4,U2AF1,HLA-A,SMAD3,SQSTM1,JARID2,NFAT5,HSP90B1,RABGEF1,TAGLN2,TPP2,PPP1CB,PTPN6,OAZ1,MBNL1,ARHGEF7,DDX17,PDCD10,PPP1R12A,CALR,GMIP,RBM39,RNASET2,SDF2L1,VCP,RAB1A,PIAS1,MKRN1,TRIM24,SYK,GPSM3,SNX3,CREB1,LNPEP,BTBD1,LAMP1,PDK1,MKLN1,FLOT2,CAPZA1,CNOT2,BIRC6,PTPN1,VASP,CORO1C,BLZF1,TCF12,DDX5,PER1,UBQLN1,RBM4,COG5,IER2,ADGRE5,PCM1,CSDE1,RNF4,ILK,PFN1,HERC1,CD2AP,M…	5.EryP	Trisomy21vsGATA1s	3684
KRIGE_RESPONSE_TO_TOSEDOSTAT_6HR_UP	6.60164	1e-50	1.165e-48	890	ITM2A,DBN1,TYROBP,TXNIP,HCST,RHOBTB3,PLP2,LYZ,SLC2A3,NEAT1,CD55,IGFBP7,HLA-A,SPRY1,KLF10,GPSM3,LPP,PTH2R,TSC22D3,RSRP1,PTGER4,TES,ABCC4,FCER1G,JAK1,LGALS1,ITM2B,SLC39A3,NFIL3,KDM6B,BMP2K,MYL12A,CPEB4,F11R,ARL4A,G6PD,RPS6KC1,PTBP3,ARMC8,AP1G2,SP100,BNIP3L,PRNP,MBD6,LRP10,YPEL5,EIF5,AP1S2,PREX1,ZBTB46,NORAD,SCAF4,SEC14L1,PTPRC,SYTL1,JAG1,ABHD2,CCDC92,AKAP13,MAFF,EGR1,SPPL2A,CTSS,NCOA3,AGA,VSIR,CARD…	5.EryP	NormalvsGATA1s	3625
REACTOME_CHROMATIN_MODIFYING_ENZYMES	6.58942	5.16378505417882e-38	2.81143596489926e-36	204	KMT2C,RCOR1,KDM2A,ARID4B,KDM6B,NFKB1,KDM6A,NCOR1,NCOA2,EP300,ASH1L,ARID2,BRWD1,ING5,GATAD2A,MORF4L1,ATF7IP,NCOA1,TBL1XR1,ATXN7,HMG20B,CHD3,ARID1B,USP22,NSD1,KDM4C,OGT,ATF2,NFKB2,PBRM1,KANSL1,SETD2,CHD4,KDM3A,KDM5B,EPC1,PHF21A,JAK2,CREBBP,KMT5B,UTY,SUZ12,ACTB,BRD1,KDM3B,REST,MORF4L2,SMARCC1,EP400,KDM5D,SETD3,ATXN7L3,GATAD2B,KAT6B,SETD1B,SMYD3,TRRAP,SMYD2,ARID4A,EZH2,GPS2,ING3,KAT7,EHMT1,MSL1,PHF8,…	5.EryP	Trisomy21vsGATA1s	3683
ACEVEDO_LIVER_CANCER_UP	6.58829	1e-50	8.77529411764706e-49	932	RHOBTB3,SELENBP1,PTTG1IP,ZFP36L1,B2M,MTSS1,LYZ,RBPMS2,IQGAP1,SPNS1,HLA-B,JARID2,YPEL5,PTBP3,RNH1,KIFAP3,RSRP1,TAGLN2,PDGFC,HLA-C,CD9,TP53BP2,WDR26,CD46,F11R,CTSH,TFG,IRF9,DUSP23,BTAF1,PIR,PIM2,ARHGAP12,FNDC3B,AFF4,ARF3,UBE2Q1,XPR1,FKBP5,UVRAG,S100A10,PIAS1,TRIP12,ATP6V1A,ZNF217,TXNRD1,TSPAN14,SERTAD2,AP1S2,UBA6,LMBR1,RSRC1,ITFG1,NBAS,TALDO1,AUH,YWHAG,LAPTM5,SPPL2A,PRKAR1A,TMED7,LCOR,PTPN12,GRN,CC…	5.EryP	Trisomy21vsGATA1s	3682
RODRIGUES_THYROID_CARCINOMA_POORLY_DIFFERENTIATED_DN	6.58535	8.846149945181e-47	9.42999584156294e-45	776	PDLIM5,CST3,SELENBP1,CAPN1,DHRS3,MAP3K5,TPST2,AKR1C1,KLF6,TXNIP,MALAT1,PRMT2,GNAS,GLUL,GSN,TMBIM1,SERF2,CITED2,SLC40A1,LGMN,NEAT1,EPB41,NET1,DDX17,RNASET2,CROT,GALNT10,THBS1,ADD1,MED13L,CPQ,ZFYVE21,ARHGAP1,CASP6,MT1F,GADD45B,ACAD8,CCDC92,SNAP23,AHCYL2,CTNND1,CCND2,HECTD1,FBXO34,NCOR1,MYLK,PPP1CB,SYNE2,FKBP5,SESN1,STIM1,ELL2,GSPT1,ENY2,F11R,MRTFB,ZNF518A,MYL4,MKRN1,GRAMD2B,NSD1,MTMR10,EHD4,ZBTB46,…	6.EryMeg	Trisomy21vsGATA1s	3105
FLECHNER_BIOPSY_KIDNEY_TRANSPLANT_OK_VS_DONOR_UP	6.58338	8.18422214832694e-43	6.71106216162809e-41	556	PDLIM5,APLP2,ACTN1,ITM2A,CFH,CD9,SELENBP1,LYZ,RHOBTB3,AUTS2,MSN,ACTR2,AKR1C1,ATP6V0E1,GSN,PTPRC,HSPA5,BMP2K,PHKB,FNBP1L,RHOA,ANXA5,CDC42BPA,SNRPD3,FYN,CITED2,ARPC5,RSRP1,STAT1,GABBR1,RAB11A,PJA2,PTP4A2,PRKAR1A,SNRPN,CD46,MYH9,CYB5R3,TFPI,ATP6V1A,HMGN3,BNIP3,PDIA3,SUB1,CTNNA1,RAB8A,LGALS1,HERPUD1,HMGN1,YWHAH,NMI,HBD,RAC1,PTPN12,CLASP2,AUH,NCOA3,RPL36AL,R3HDM2,SMG1,FECH,C1D,SLC5A3,HSD17B4,RAB2A,DYN…	6.EryMeg	Trisomy21vsGATA1s	3104
LOPEZ_MBD_TARGETS	6.57754	1.83198215493094e-49	2.06509695664295e-47	925	APLP2,VCL,ACTN1,MAX,ALDOA,PFN1,CD63,LYZ,CAPN1,RHOC,PDCD10,S100A10,GNAQ,PTTG1IP,ARPC3,PPP1CA,SERPING1,NCOA4,MICALL2,RAB10,RPN1,TPM3,CAPZB,SLC43A3,FAM89B,RHOA,ANXA5,FAM234A,CTSH,UBAC1,GSTP1,AGPAT3,CTDSPL,ELF4,USP20,LGMN,NCAM1,NEAT1,ARPC4,TMEM50A,MEG3,ABHD2,SEMA3C,RHOB,RNPEPL1,TP53BP2,SERPINH1,SUB1,ATP6V0C,ITM2B,CDC42,RPS27L,YES1,ARL6IP4,C15orf39,ATP6V0D1,RAB8A,HDAC5,AMBRA1,INPP5B,FNTB,RAB5C,FES,NQO…	6.EryMeg	Trisomy21vsGATA1s	3103
BLALOCK_ALZHEIMERS_DISEASE_UP	6.57566	2.15182804494304e-42	3.27692670844183e-40	1615	FTH1,RPS4X,ZFP36L2,SELL,IFITM2,MYCN,HLA-E,BIN1,ZFP36,NR4A3,PIM1,NFKBIA,CLIC1,RBM8A,EEF1A1,PABPC1,CCNI,RBM3,REST,RPL28,RPL10,IER2,CD37,MAFF,SUMO3,PECAM1,ANXA1,APP,EIF5,DAZAP2,IL2RG,TNFAIP3,IQGAP2,COMT,PEBP1,CSF1,LAT2,PBXIP1,EEF1D,JUN,BTG2,MAP2K2,AKAP13,ARPC1B,PTTG1IP,GPSM3,KLF2,MALT1,NOP53,WAS,CTDSP1,JUND,VAT1,C15orf39,PPDPF,PGLS,PNISR,GSTM5,DDX27,PRKX,CMTM6,PKN1,MRPL57,USF2,PRDX3,PTBP1,CPSF1,FKBP…	7.EMPP	NormalvsTrisomy21	2767
DEBIASI_APOPTOSIS_BY_REOVIRUS_INFECTION_UP	6.57384	5.65756150578652e-38	3.94443073207172e-36	286	GNAQ,SLC2A3,CD55,BACH1,MED13L,NR4A2,DYRK1A,STAT1,AGFG1,ITCH,ZEB2,ZC3HAV1,KLF6,DNAJB6,MAP2K4,USP9X,TIPARP,SP100,ZNF292,BAZ2B,FOXJ3,WASL,CD2AP,SECISBP2L,BLZF1,MID1,MKLN1,IFRD1,MED21,DHX9,RLF,SHOC2,ZNF217,ANXA1,PIR,ZNF518A,CCL5,TBPL1,TMCC1,RAB3GAP1,SNRK,PTPN2,AKAP10,ARHGAP5,IRF9,UBE2H,ATF6,STRN3,WASHC4,CAPZA2,SREBF1,PPM1A,BRAP,STK17B,NRAS,FXR1,MAP3K1,ANAPC10,SMIM8,ZNF529,UGCG,ZBTB20,CELF1,MAP4K5,WTA…	7.EMPP	Trisomy21vsGATA1s	3229
THEILGAARD_NEUTROPHIL_AT_SKIN_WOUND_DN	6.56578	1.37529377098025e-37	9.59106740098566e-36	226	TGFB1,MEIS2,ACTN1,OAZ1,STK24,IQGAP1,MAP3K5,TPST2,GNAQ,ARPC3,PPP1CA,PRMT2,GNAS,PRKCB,FLOT2,EIF4G2,NCOA4,NCF4,CDKN2D,CALM1,CAPZB,ARPC1B,PHKB,GNAI2,PPP1R12A,CITED2,JAK1,ARHGDIB,PRKAR1A,CD46,NFE2,CBFA2T3,PLCG2,USP15,HDAC5,PDE3B,ANXA11,ARHGAP1,SNAP23,TBPL1,NCOA1,STAT6,ACTN4,RIPK1,FLI1,TADA3,POLR2J,SELPLG,RGS19,APAF1,COX5B,ARHGAP4,TST,GTF2B,ADGRE5,TSC22D3,TWF2,NPEPPS,SPAST,RALY,ZNF217,LASP1,RABIF,SPTLC…	6.EryMeg	Trisomy21vsGATA1s	3102
RODRIGUES_THYROID_CARCINOMA_POORLY_DIFFERENTIATED_UP	6.56299	2.10966111741534e-43	1.78889673388106e-41	625	CYTOR,MRPS12,HACD1,ITGB1,YWHAZ,CTSA,LY6E,IL1RAP,RHOBTB3,VPS50,ACTR2,STAM,GPD2,EIF4G2,TNFSF9,GALE,KIF2A,JPT1,SERPINH1,SNCA,SUB1,ELOVL6,OSBPL3,RSRC1,PTPN12,LNPEP,EVI5,LZIC,APC,IGF2BP3,GSR,GSPT1,NNT,AGFG1,ITCH,MICU1,BOLA2,CD58,SEL1L,TFDP2,ATP6V1C1,NEDD4,STAM2,MOB1A,FAF1,WDR41,ASXL2,P4HA1,CCDC14,UBA6,SAR1A,MIPOL1,P3H1,IDE,ODF2L,AP2S1,DCUN1D1,ABCD3,BNIP3L,UBE2W,EXOC5,MBNL1,NDUFV3,MAPK1,CTSC,RPAP3,SRSF…	6.EryMeg	Trisomy21vsGATA1s	3101
REACTOME_NEUTROPHIL_DEGRANULATION	6.56248	8.58654581570055e-43	5.61816186309741e-41	465	LRRC7,CYBA,ASAH1,TYROBP,VCL,SLC2A3,PTPRC,CD55,ACTR2,B2M,CD63,LYZ,PSAP,BIN2,CST3,IQGAP1,GSTP1,HLA-B,S100A11,YPEL5,DNAJC3,ARMC8,CAPN1,CTSA,HLA-C,CFP,PTPN6,UBR4,RAB10,CTSH,ERP44,FCGR2A,B4GALT1,ALDOA,RNASET2,LAMP2,NCKAP1L,FCER1G,ATP11A,VCP,CAB39,ALDH3B1,TMBIM1,CTSZ,CD68,NFKB1,TSPAN14,MAN2B1,STK10,DOCK2,ADAM8,LAMP1,ATP6V0C,RAB5C,GRN,HUWE1,RAB6A,ATP6V0A1,LAMTOR1,PFKL,TRAPPC1,CD33,DIAPH1,RAB7A,ADGRE5,SD…	5.EryP	Trisomy21vsGATA1s	3681
REACTOME_INFECTIOUS_DISEASE	6.55889	1e-50	1.69568181818182e-48	993	TGFB1,STAM,ROCK2,ITGB1,PRKAR2B,TUBA1C,LYN,POLR2A,FCGR2A,YES1,CTNNB1,TXNIP,CD4,DNAJC3,RCOR1,ACTR3,MED13L,GPC4,STAT1,RUNX1,CYBA,CLTC,RPN1,MAP2K4,FUT8,ACTR2,CTDP1,NCOR1,JAK1,VCP,SMAD3,MYH9,SYK,RIPK1,BTK,GNG2,CD9,JAK2,STAM2,TUBB1,IFNAR1,TUBB4B,AP2B1,MAP2K1,YWHAZ,FYN,CHD4,GNAI2,YWHAB,WIPF2,CREBBP,FURIN,NCKAP1L,TXNRD1,AP1G1,ITPR2,GNAS,IGF1R,GTF2E2,SOS1,ITCH,MAN2A1,STAT2,PAK2,MGAT5,ATP6V1H,FNTB,ABI1,MED…	7.EMPP	NormalvsGATA1s	3108
JIANG_MELANOMA_TRM6_CD8	6.55658	4.82676338685428e-33	4.13992050490881e-31	139	RPS4X,RPS26,GAPDH,GNA15,EEF2,IFITM2,IFITM1,ACTG1,GMFG,RPL7A,RPLP0,CLIC1,LGALS1,RBM3,RPL28,RPL10,LSP1,APRT,CORO1A,RACK1,EIF3F,LAT2,ARPC1B,EIF3I,NOP53,RAC2,CLTA,ANXA6,RILPL2,ATP5PB,PSME1,MYL6,ABRACL,BTF3,RPL29,RPS2,MYO1G,ARPC3,RNH1,ARPC5,ATP5F1C,RPSA,PSMD8,PLP2,IFITM3,PPP1CA,ARL6IP5,EIF4E2,NPC2,EEF1B2,CSNK2B,CRIP1,PYCARD,PDLIM2,CD47,KXD1,PRELID1,CCT2,IGBP1,RASGRP2,HMGB2,RPS12,RPL10A,PRR13,PDLIM1,GL…	7.EMPP	NormalvsTrisomy21	2766
DANG_BOUND_BY_MYC	6.54512	1e-50	1.69568181818182e-48	1010	MEIS2,TGFB1,ABCC4,PAPPA,ASAH1,ZFP36L1,PPP1R12A,ITGB1,JARID2,MSN,MAP3K5,ACTR3,PDCD10,RABGEF1,NID1,ARHGEF7,CD164,CYBA,LMNA,XK,U2AF1,APC,SPTLC2,VCP,SMAD3,ITGA6,DDX17,HERPUD1,GCLC,SRSF7,SYK,PSAP,LNPEP,GALC,GMIP,PTPN1,CTSC,MBNL1,BLZF1,E2F3,DDX3X,TOP1,PDK3,BSG,IFNAR1,NFAT5,SRRM2,ADGRE5,CD63,OAZ1,AMMECR1,ILK,IER2,AGPS,THRAP3,FLOT2,IRF9,NFIL3,PCYT1A,ACAD8,SQSTM1,MAN2A1,HSP90B1,AKAP9,TFRC,TCIRG1,SIRT1,FXN…	7.EMPP	NormalvsGATA1s	3107
TIEN_INTESTINE_PROBIOTICS_24HR_UP	6.54463	8.66989713953502e-42	6.88242260161812e-40	550	ASAH1,ACTN1,TAGLN2,MYL6,SNX3,SGMS1,HIGD1A,UROD,ATP6V0E1,GLUL,CALM1,TPM1,UBAC1,SNRPD3,ARF3,ARHGDIB,WASHC2C,TMEM50A,DCAF6,CYB5R3,DAG1,HMGN3,SUB1,CDC42,RAB8A,AMMECR1,TUBB2A,TGOLN2,NDUFA13,PGAM1,REEP5,POLR2L,CMTM6,C1D,ATP2C1,NDUFB2,MAP4K4,PACSIN2,NDUFB1,MFSD1,TOP2B,PCMT1,SMYD2,ATP5MF,ZFYVE16,NPTN,AREL1,ZC3HAV1,MPZL1,RECQL,ADI1,PLEKHB2,SPAST,COX17,ANP32E,SAR1A,TAX1BP3,GGA2,ABCD3,PON2,RBX1,PPIF,UBL5,CA…	6.EryMeg	Trisomy21vsGATA1s	3100
GARY_CD5_TARGETS_UP	6.53706	1.3827336402573e-33	1.25828761263414e-31	455	ZFP36L2,DDIT4,RGS1,TKT,TPM4,HLA-E,NFKBIA,PFKL,GNAI2,CD37,LSP1,JUNB,CD52,KDELR1,CEBPB,IL2RG,TNFAIP3,PBXIP1,BTG2,MAP2K2,AKAP13,TTC3,WSB1,NR1H2,CAPNS1,PGK1,WAS,JUND,NUCB2,ETHE1,SHKBP1,GRK2,ALKBH7,WIPF1,PKN1,METRNL,PTPN6,RALA,PIM2,MAZ,SEPTIN6,UQCRC1,FXYD5,APEH,POLD4,UCP2,PPP1R18,MYLIP,BCL3,ARHGDIA,IFRD1,KDM6B,SF3A2,IDH2,SHMT2,CSNK1E,DHRS7,IL10RB,ATP5F1D,NPC2,SAT1,GABARAP,HNRNPUL1,MYADM,RUNX3,TCF4,MKN…	7.EMPP	NormalvsTrisomy21	2765
GOBERT_OLIGODENDROCYTE_DIFFERENTIATION_DN	6.53261	1e-50	1.69568181818182e-48	1065	DNM3,PLXDC2,SLC2A3,RABGAP1L,PLEKHG1,VPS50,RHOBTB3,MBOAT2,SLC22A23,CNRIP1,ZMYND8,DIPK2A,LTBP1,TXNIP,MAP3K5,TP53INP1,LMBRD1,PDCD10,PROS1,STAT1,PRKCQ,GNPTAB,SCAF4,C21orf91,PDK1,WDR1,SPECC1,BCAS3,MAP2K4,NCOR1,TNFSF9,SPTLC2,KLHL2,CPEB2,DBN1,SEMA4D,CMTM6,SLC44A1,GALC,HECTD4,MBOAT1,CD9,IGFBP7,JAK2,PDGFC,TMBIM1,CSF1,FYN,LCORL,CHD4,RASGEF1B,MPZL1,GADD45B,ULK2,TBC1D23,WWP1,LRRC8B,MFAP3L,IFI27L2,ECPAS,ITPR2…	7.EMPP	NormalvsGATA1s	3106
IVANOVA_HEMATOPOIESIS_MATURE_CELL	6.53006	5.00140164202054e-38	3.51985436315785e-36	289	RHAG,MTSS1,KEL,BMP2K,FYB1,LIMS1,PIK3CB,SLC40A1,SLC22A23,SPECC1,CPEB4,SPTA1,ANKRD9,PPP3R1,FBXO34,WDR26,AGFG1,GPCPD1,TFDP2,PICALM,NUDT4,SDCBP,RNF19A,USP25,HECTD1,ATP6V0A1,RAB6A,TNRC6B,TENT5C,CTSH,KLF11,EHBP1L1,CCND3,SNX13,EPS15,ANO10,LMTK2,CDR2,YPEL5,ADD1,TMCC1,SYNJ1,RIOK3,RELCH,LAMP2,USP32,LNPK,SNCA,NOCT,CDKN2D,DAAM1,CMAS,GYPA,UBAC1,GOLIM4,TCEA1,SLC25A37,RBMS1,STK17B,TRAK2,C1GALT1,AP2A2,LGMN,MKRN1…	7.EMPP	Trisomy21vsGATA1s	3228
LEE_BMP2_TARGETS_DN	6.52521	8.64525215691473e-50	9.21336872722627e-48	889	SLC2A3,JARID2,LRP12,SPTLC2,PDE3B,DNAJC3,CDYL,CTNNBL1,HSPA5,PDGFC,BTAF1,FUT8,AGFG1,FOXN2,SMCHD1,ORC4,RUNX1,TANK,GNPTAB,NOL4L,ANGPT1,JAK1,DNAJB11,E2F3,CDC73,TXNRD1,USP24,SLC16A3,NUS1,ZNF148,CUL3,CRY1,TDG,CEP192,IFRD1,GTF2E2,MTREX,CPSF6,TFRC,TGOLN2,KPNA1,RIF1,OPA1,FKBP5,EZH2,XPO4,RRN3,RRP12,CDR2,UBQLN1,TAF2,MCTP2,EIF3J,RNF4,RIOK3,LARP4,SMARCA5,LNPK,PIGA,B4GALT5,YAF2,NUP93,YWHAG,NOCT,GSPT1,POF1B,EXOC…	7.EMPP	Trisomy21vsGATA1s	3227
REN_ALVEOLAR_RHABDOMYOSARCOMA_DN	6.52441	9.54277361915199e-39	6.98119379863844e-37	407	PDLIM5,TGFB1,TIMP1,APLP2,CST3,ACTN1,TLN1,TAGLN2,S100A6,IQGAP1,CD151,RHOC,LY6E,TPST2,S100A10,MSN,ACTR2,ATP6V0E1,KLF6,WDR1,ARPC3,SH3BGRL3,GSN,CAPZB,LXN,ARPC1B,DCBLD2,GNAI2,CORO1B,RHOA,ANXA5,SMAD3,ARPC5,ELF4,CLIC1,CAP1,JAK1,LPP,TMOD3,NUCB1,TMEM50A,SEMA3C,PDGFC,MYH9,KLF2,ATP6V0D1,MMP14,THBS1,OSBPL3,RAB5C,AP2M1,AMMECR1,NQO2,SCPEP1,REEP5,RAC1,SKAP2,CMTM6,SNAP23,GRN,SLC10A3,MYLK,SSH1,RRAS,WIPI1,STAT6,AC…	6.EryMeg	Trisomy21vsGATA1s	3099
ENK_UV_RESPONSE_KERATINOCYTE_UP	6.52275	3.3696291055249e-47	3.14049432634921e-45	510	KYNU,TGFB1,CYBA,RNH1,S100A11,GSTP1,STXBP2,NR4A2,HLA-B,TAGLN2,BSG,B2M,ZFP36,TNFSF9,CD4,DNAJB6,IER2,ETS2,MRPS12,FOS,OAZ1,FMNL1,HLA-A,EMP3,MAGED2,GADD45B,GNAS,TALDO1,ELL2,VCP,CITED2,ATP6V0C,DUSP1,JUNB,CDC37,NUCB1,SNTA1,RPN1,PTGS1,ALDOA,PPP1CA,MYCN,LGALS1,TSC22D1,ATP6V0E1,ITM2B,TUBB4B,CDKN1C,CTSD,GRN,PFN1,AP1G2,RPS10,POLR2A,RNF24,DCTN1,LY6E,P4HB,EIF5,ARHGDIA,VASP,HMG20B,TST,JUP,CDK2AP2,ATP6V0B,STX11,…	5.EryP	NormalvsGATA1s	3624
MARSON_BOUND_BY_E2F4_UNSTIMULATED	6.51698	9.26019422040181e-43	7.51082274702591e-41	664	MRPS12,ARMC8,IQGAP1,MSN,GPD2,STAT1,CLIC1,CCM2,NET1,RAB8A,DNAJB11,C1orf174,CDK2AP2,MPDU1,TXLNA,ENY2,C6orf89,BLZF1,UFD1,ZNF438,EHD4,RIOK3,RECQL,DHRS7B,VPS26B,RAB11B,HSP90B1,ANP32E,FHOD1,GOLT1B,EFCAB11,UBAP2,FKBP15,XRCC2,DERL2,ABCB6,RAMAC,POLR2A,BTBD10,ADHFE1,RAD51B,SRSF6,GTF2A1,ALAD,MRPL27,APLF,C6orf47,SMC6,TMEM167A,IFT80,XRCC4,MSH3,ANKFY1,POLE2,PLEKHO2,TINF2,CENPK,SENP1,EMC3,CC2D1A,RASSF3,SAE1,TON…	6.EryMeg	Trisomy21vsGATA1s	3098
REACTOME_ADAPTIVE_IMMUNE_SYSTEM	6.50613	2.06235182945331e-45	2.05190258018408e-43	808	LAT,PRKN,DNM3,HERC2,TYROBP,TUBA1C,CD36,FYB1,B2M,CD4,HCST,ITGB1,CYBA,YWHAZ,KIFAP3,CTSA,RNF182,PRKCB,PTPN6,PTPRC,HSPA5,NCF4,ZBTB16,CALM1,CAPZB,TUBB1,CTSH,UBAC1,LCP2,CLTC,UBE2Q1,FYN,PIK3CB,VASP,BTK,PRKCQ,PJA2,LGMN,PSMD6,ICAM4,CSK,KIF2A,LYN,HLA-C,PLCG2,PDIA3,CDC42,YES1,TRIP12,UBE2F,UBC,YWHAB,AP2M1,TUBB2A,HECTD3,RAC1,AP1S2,IKBKG,SYK,PPP2R5A,HLA-B,RNF19A,ORAI1,SNAP23,TPP2,LNPEP,HECTD1,PAK2,SLAMF6,DYNC1…	6.EryMeg	Trisomy21vsGATA1s	3097
BUYTAERT_PHOTODYNAMIC_THERAPY_STRESS_DN	6.50119	2.01715078023021e-42	1.61849237871804e-40	635	PDLIM5,MEIS2,VCL,NID1,RHOBTB3,MAP3K5,CCND3,ADAMTS3,SLC43A3,ITGB3,CTDSPL,ARF3,ARHGDIB,FUCA1,RNASET2,DAG1,OSTF1,SUB1,EBAG9,ELOVL6,GALNT10,THBS1,OSBPL3,C16orf95,FNTB,ACSL5,POLR2L,SEPTIN7,GCHFR,M6PR,SERPINE1,BLOC1S1,CTNNBIP1,IGF2BP3,SLC25A12,NEDD4L,LAPTM5,BOLA2,PLCXD1,RAC2,SLC16A7,FOCAD,HEXIM1,ANP32A,PTPN18,CHST2,SLC25A11,HMOX2,FHOD1,CLTB,PGP,CCDC28B,PON2,RABIF,DPM2,AP2A2,ATXN10,TGFBR2,CTSC,VANGL1,NR…	6.EryMeg	Trisomy21vsGATA1s	3096
OSWALD_HEMATOPOIETIC_STEM_CELL_IN_COLLAGEN_GEL_DN	6.49486	2.69586531270653e-37	1.40716017225855e-35	263	SLC2A3,IL2RG,ATP2A3,ACTR2,LDLRAD4,MED13L,NFAT5,ARMC8,RSRP1,TXNIP,CD9,ATP9B,ANKRD11,DDX17,TMOD3,GYPA,CYLD,EZR,RBM25,AGFG1,GPSM3,CREB1,PTPRCAP,MAP3K2,LRRFIP1,BRWD1,RIOK3,ZNF292,RLF,SOS2,BMPR2,TBL1XR1,MEF2A,PRRC2C,PCM1,SPEN,PAK2,SLC16A3,SERPINF1,UBE2W,MARK4,KANSL1L,RAB3GAP2,KDM5B,CDKAL1,KLF13,KLHL24,MAP3K1,CDV3,EFCAB14,RGS10,POU2F1,CASP8,CR1,FEM1C,ELL,P4HA1,ARMH3,ZFR,SIK2,ZBTB1,ANKRD12,UGCG,N4BP1,BN…	5.EryP	Trisomy21vsGATA1s	3680
IKEDA_MIR30_TARGETS_UP	6.49125	1.5998966592314e-34	9.11086189150094e-33	116	PPP1R12A,ACTN1,USP15,PDCD10,PTBP3,MAP4K4,YWHAZ,CPEB4,NFAT5,USP47,SCAF4,PIP4K2A,CPEB2,XPR1,USP34,FNDC3B,CAPZA1,TAOK1,WDR44,EPC2,TNRC6A,ATP2B1,ASAP1,SPPL3,KRAS,NCAM1,CELF2,FNDC3A,LRRC8D,WDR7,CHD9,CSNK1G1,GOLGA4,ITSN1,MAN1A2,PTPN2,TBC1D15,B4GALT5,PELI1,KDM3A,CCND2,CPNE8,ELL,ARF4,RASA1,P4HA1,PPFIA1,CALM1,ARID4B,NEDD4,PHTF2,XPO1,SOCS6,CAST,ELMO1,AP3S1,GALNT7,SEC23A,CLOCK,RNF44,GNA13,PI4K2B,MAML1,NRBF2…	7.EMPP	Trisomy21vsGATA1s	3226
JIANG_MELANOMA_TRM6_CD8	6.49012	2.44153055627053e-32	1.14583025225728e-30	139	RPS4X,RPS26,EEF2,RPL7A,APRT,IFITM2,RACK1,RPL10,RPLP0,NOP53,RPL28,RPL29,EEF1B2,GMFG,GAPDH,RPS2,RPS12,LSP1,EIF3F,RNH1,RPSA,NACA,PRELID1,ARPC1B,GNA15,RAC2,RASGRP2,CLIC1,PDLIM1,IFITM1,CD47,PYCARD,CRIP1,EIF3I,PRR13,PSMD8,BTF3,CSNK2B,PPP1CA,ARPC3,CLTA,PHF5A,LGALS1,RILPL2,RBM3,ACTG1,RPL10A,CORO1A,RPL24,PLP2,KXD1,ABRACL,EIF4E2,ANXA2,MRPL58,ATP5PB,PSME1,ARPC5,REEP5,CORO1B,NPC2,MYO1G,IFITM3,RPL22,PDLIM2,AP…	5.EryP	NormalvsTrisomy21	2864
SPIELMAN_LYMPHOBLAST_EUROPEAN_VS_ASIAN_UP	6.48898	2.63327873468169e-36	1.52321906342595e-34	476	APRT,RPL19,HMGN1,SRGN,AHCY,ARHGDIB,CYB5R3,AKR1A1,ICAM3,CCDC85B,PGLS,RPS28,RPS7,ATP5PF,NME2,S100A11,ATP5MC2,RRP1,NACA,PKN1,OAZ1,MARCKSL1,TXN2,MPST,ATP5F1D,CSTB,NME4,RPS8,SMARCD2,FARSA,PTPN6,TOMM40,GPX4,UQCRC1,NPM1,AUP1,SF3A2,MAP2K2,C1QBP,RPL36,ACY1,NDUFB8,TUBB,MAPK12,PPIB,RALY,PSMB5,FAU,PEBP1,SCAND1,ACTG1,TBCA,DPF2,NENF,UCP2,PARK7,DAZAP1,RRP7A,STXBP2,DEAF1,PSMD13,IMPDH1,VPS4A,PFN1,DDX3X,MYL6B,MTA1…	5.EryP	NormalvsTrisomy21	2863
DACOSTA_UV_RESPONSE_VIA_ERCC3_UP	6.48664	2.65092357557117e-31	2.06054080426168e-29	309	IFITM2,NR4A1,ICAM3,HLA-E,GSTP1,BTG1,JUNB,MBOAT7,ERGIC3,EEF1D,BTG2,EIF3I,ACOT2,HLA-A,RABAC1,SNHG29,PIM2,MAZ,UQCRC1,PLTP,NFKBIE,ADA,MOAP1,POLR2A,PNP,BRD2,CCDC85B,IDH2,BTBD2,PSMD8,RHOB,ZFPL1,FKBP1A,SHMT2,GET3,PPP1CA,MDK,GRHPR,SMIM10L1,CREM,RELA,ZKSCAN1,GCH1,SAT1,CLTB,MGAT1,HHEX,CEP68,GRINA,TFAM,AGPAT2,UBA1,IRF1,PSMC3,PQBP1,ARRB2,TRIAP1,AP3M2,PPIF,MAT2A,TNFSF13,PLD3,TP53I3,ACAA1,TMED1,RSL1D1,BSG,GDI2…	7.EMPP	NormalvsTrisomy21	2764
BENPORATH_MYC_MAX_TARGETS	6.48446	2.40756872491334e-35	2.49517747573657e-33	738	FTH1,RPS26,SRSF5,SRSF7,CCT8,IER2,MAFF,LSP1,TUBA1B,ATP5F1B,RPL19,DDX5,SEC61B,EIF3K,RPL8,PMPCB,PHB2,GPSM3,EIF3I,SOD1,CCT7,BCKDHA,CTSC,RNF7,RAC2,SERP1,DDX3X,SNX3,RPS5,RBM15B,SERTAD1,CPSF1,USP11,HLA-A,ATP5MC2,PTPN6,RPL18,EIF4H,VCP,VDAC2,POLD4,PKM,THRAP3,SNX5,HAX1,ZNF593,PTDSS1,RASSF1,ATP5F1C,CDK6,SUGT1,ABT1,PSMD8,ZFPL1,CALM2,PWP1,HNRNPL,TAGLN2,NXT1,ARL6IP5,PSMB5,UBE2G2,GALC,EIF4E2,PSMC5,PSMG1,GABARAP…	7.EMPP	NormalvsTrisomy21	2763
WANG_LMO4_TARGETS_DN	6.48211	5.96388357543329e-37	3.97237245292253e-35	347	PIK3CB,U2AF1,NEAT1,AP3B1,EXOC4,UBR4,TRIP12,RABGEF1,IQGAP1,TOP1,ATAD2B,FUT8,USP47,PDZD8,ZNF407,ACTR2,ACSL3,ITCH,PDK3,CPEB2,TMOD3,SCFD1,USP8,COG5,UBA6,CTNND1,RBM25,RICTOR,BAZ2B,ARFGEF2,PLEKHB2,WASL,AFF4,NUFIP2,EIF4G3,WDR41,LXN,RDX,TDG,SH3GLB1,MKLN1,SAR1A,GGNBP2,TTC17,RRN3,SNX4,CDR2,UBQLN1,ATP6V0E1,PHF6,PSAP,SRGAP1,NRBP1,RBM26,EXOC6,BCAP29,RAB18,INSR,IRF9,MACC1,PAK2,UBR5,AKAP9,CAPZA2,TMEM64,DUSP23,E…	7.EMPP	Trisomy21vsGATA1s	3225
CHAUHAN_RESPONSE_TO_METHOXYESTRADIOL_DN	6.47843	2.34878705691209e-32	1.94740544651978e-30	100	PCBP2,ZFP36L2,ARHGDIB,VIM,EEF1A1,PABPC1,LGALS1,LSP1,BTG1,ATP5PO,DDOST,IL2RG,TNFAIP3,EIF3F,EIF3K,BTG2,GNAS,PHB2,ERP29,CAPNS1,PGK1,CTDNEP1,SLC25A6,TRBC2,B2M,PTPN6,UBE2S,PIM2,BTF3,YWHAB,NUCB1,PKM,HERPUD1,ARPC5,LITAF,HSP90AB1,IDH2,CSNK1E,NPC2,RPL12,UBA1,HCLS1,MCL1,SLC1A4,VAMP2,MDH1,ADD1,LTA4H,UBE2J1,COPE,WBP2,CD164,CTBP1,AP3S1,PDLIM1,EIF3M,NCSTN,TPP1,UBE2I,ATP5MF,NAP1L1,ATP6V1F	7.EMPP	NormalvsTrisomy21	2762
REACTOME_METABOLISM_OF_RNA	6.47197	3.11480221177785e-35	3.18392521976525e-33	714	RPS4X,RPS26,PCBP2,SRSF5,RPS3,SRSF7,EIF4A1,RPL7A,RPLP0,TSEN54,ZFP36,RBM8A,PABPC1,RPL28,RPL10,SF3A1,PPP2R1A,UBB,RPL19,DDX5,RAN,HSPA8,RPS14,CNOT7,RPL8,PSMB8,RPL11,LSM2,SRSF9,PUF60,DDX39B,RPS5,HNRNPK,SNRPB,IMP3,PSME1,PTBP1,CPSF1,RPL18A,RPL36AL,RPL6,FAM32A,RPS15,RPL18,SF3B2,RPL29,YWHAB,RPS2,SRSF6,RTRAF,NOB1,CSTF2T,POLR2A,PRPF8,RPSA,RRP7A,LSM7,SF3A2,PSMD8,RPL22L1,HNRNPL,CSNK1E,CHTOP,RRP1,SNRPG,HNRNPF,N…	7.EMPP	NormalvsTrisomy21	2761
SENESE_HDAC1_TARGETS_UP	6.45991	9.68274552566146e-39	8.91888448974817e-37	433	KYNU,ABCC4,BACH1,CD55,MAX,CA2,MAST4,LNCAROD,CPEB4,NEAT1,PTBP3,IQGAP1,ZMAT3,TFPI,ACTR2,USP16,PTPN12,DCP2,ITGA6,PDE4DIP,GALC,GPCPD1,TGFBR2,EIF4G1,ZNF644,PRDM2,MBNL1,HECTD1,DDX3X,TOP1,FCHO2,YWHAZ,CHD4,TMEM41A,ITPRID2,CDC42SE2,TMOD3,ATP11A,AKR1C1,ZBTB38,PTBP1,RAB35,SQSTM1,PLEKHM1,SLC43A3,TFRC,STRN,ZNF655,CTNNA1,RRN3,BCL2L1,YTHDF3,ITPR1,SGPP1,HDAC9,PTPN11,PLEKHB2,TAOK1,IGF2BP3,RAB6A,SLC7A11,PPIF,NEDD4…	7.EMPP	NormalvsGATA1s	3105
KEGG_MEDICUS_REFERENCE_TRANSLATION_INITIATION	6.45771	1.65987419138285e-32	7.88916001025404e-31	81	RPS4X,RPS26,RPL7A,RPL12,RPS3,RPS14,RPL18A,RPL10,RPLP0,RPL19,RPL6,RPL28,RPL29,RPL8,RPS5,RPS2,RPL18,RPS12,RPL11,RPS15,RPL41,RPS28,RPS7,RPL3,RPL13,RPSA,RPL32,RPL30,RPL5,RPLP1,RPS8,RPL35A,RPL36,RPS13,RPS24,RPS3A,RPS27A,FAU,RPL10A,RPL24,RPS15A,RPS21,RPS19,RPS9,RPL26,RPS23,RPL22,RPL34,RPL15	5.EryP	NormalvsTrisomy21	2862
HALLMARK_HEME_METABOLISM	6.45752	1.65309476769472e-34	9.34249012651714e-33	193	RHAG,ANK1,GATA1,MBOAT2,KEL,GYPB,BMP2K,BACH1,GYPE,USP15,ELL2,EPB41,TOP1,SPTA1,FBXO34,TRIM58,DCUN1D1,XK,CLIC2,TFDP2,PICALM,MARK3,DMTN,NUDT4,SDCBP,RNF19A,NCOA4,GCLC,ATP6V0A1,EIF2AK1,TNRC6B,SELENBP1,TENT5C,CCND3,NFE2,TFRC,CDR2,YPEL5,ADD1,SYNJ1,SLC10A3,RIOK3,BSG,LAMP2,AGPAT4,SNCA,DAAM1,CA2,GYPA,UBAC1,FECH,CPOX,NNT,TCEA1,SLC25A37,CA1,TRAK2,TAL1,MKRN1,SLC7A11,LPIN2,FN3K,BNIP3L,KDM7A,SEC14L1,NEK7,KAT2B,R…	7.EMPP	Trisomy21vsGATA1s	3224
MULLIGHAN_MLL_SIGNATURE_2_UP	6.45623	5.08967510595201e-32	4.17353358688065e-30	412	ATP8B4,SRGN,FOSL2,LGALS1,IGFBP7,PECAM1,MICAL1,LAT2,MAP2K2,PSMB8,ITGB2,ID2,MALT1,FES,RAC2,ENO1,CXCR4,C15orf39,SYNGR2,CAPG,SEPHS2,CTSA,MAZ,ATP6V0E1,UQCRC1,LAPTM5,POLD4,PKM,GRN,NDUFC1,RRP7A,SDHD,APBB1IP,RER1,IL10RB,ARL6IP5,CBFB,SMIM10L1,ARPC2,EIF4E2,TADA3,EVI2B,PYCARD,HNRNPUL1,CLTB,LAIR1,TRAPPC10,CLN3,NKIRAS2,CD2BP2,SELPLG,HCLS1,LAMP1,SLC1A4,SIPA1,SERF2,BID,OAZ1,PLIN3,ECHDC2,PPIF,NLRP3,SDF4,MFSD1,ND…	7.EMPP	NormalvsTrisomy21	2760
GRAESSMANN_APOPTOSIS_BY_DOXORUBICIN_UP	6.45042	1.8542146354205e-49	2.06509695664295e-47	1112	PDLIM5,PDLIM1,ITGA2B,EMP3,SPNS1,CAPN1,PDCD10,HIGD1A,SH3BGRL3,GLUL,GSN,NCOA4,CD68,CXXC5,C21orf91,TMBIM1,NBEAL2,PDLIM7,CITED2,ZMAT3,ITGA6,STAT1,ZNF385A,PRKCD,USP20,ALOX12,PSTPIP2,FUCA1,CROT,TUT7,JPT1,TMEM41A,YPEL5,TP53INP1,ATP6V0C,CPEB4,ATP6V0D1,THBS1,ZC3H12C,UBE2F,FOS,INPP5B,NINJ2,RABGEF1,TGOLN2,ABHD4,ZFYVE21,FAM50A,FOSB,NMI,MACROD2,ARPP21,ECE1,TANGO2,TIPARP,NAPA,SP100,AGTPBP1,ACAD8,SLC39A4,RBM4,A…	6.EryMeg	Trisomy21vsGATA1s	3095
ZHENG_BOUND_BY_FOXP3	6.44837	3.53930713429486e-40	2.66770806425336e-38	486	LDLRAD4,TMSB4X,MIR4435-2HG,FYB1,NR4A2,MT-ATP6,STK24,PRKAR2B,RABGAP1L,CHD7,MAP3K5,DAD1,SGMS1,RGS10,KLF6,MACF1,GPD2,PTPRC,JARID2,ELF1,C21orf91,SMAD3,FYN,CITED2,ITGA6,PTBP3,PRKCQ,JAK1,EPB41,TENT5C,SNCA,TP53INP1,ITM2B,KLF2,ATXN7,ARL4A,ACTR3,NINJ2,STK10,SNX14,GNG2,SP100,NCOA3,TPP2,GTDC1,HECTD1,SLAMF6,SYNE2,EVI5,SESN1,HEATR5A,APBB1IP,ZFAND6,MAP4K4,TEC,TOP2B,FLI1,STAT5B,MRTFA,ZC3HAV1,FAM3C,HEXIM1,B3GNT2…	6.EryMeg	Trisomy21vsGATA1s	3094
KOINUMA_TARGETS_OF_SMAD2_OR_SMAD3	6.44808	1e-50	1.165e-48	813	PDLIM1,TLN1,RNH1,STON2,ZFP36L1,C15orf39,TAGLN2,AHNAK,PLP2,AKR1C1,ACTN1,BACH1,ETS2,HSPA5,CLIP2,SLC7A5,VCL,CD55,DHRS3,CAPNS1,KLF6,S100A10,KLF10,TMBIM1,ELL2,JUNB,TES,MALAT1,RHOC,PIM1,TSC22D1,SERPINE1,NFIL3,CXXC5,SMAD3,FURIN,F11R,ARL4A,ARHGDIB,PTBP3,PFN1,ARHGAP21,CSRNP1,PRNP,WASF2,RIN3,NET1,SGMS1,IRF2BP2,PKM,MYH9,ZMYND8,CIRBP,AP1S2,FOSL1,TAX1BP1,STK10,MBOAT2,JUP,KLF7,BLZF1,SREBF1,SYK,MALT1,MBOAT1,ANX…	5.EryP	NormalvsGATA1s	3623
HALLMARK_OXIDATIVE_PHOSPHORYLATION	6.44152	1.50935561353727e-31	1.1981714455548e-29	200	SLC25A5,CYB5R3,ATP5PO,SLC25A3,ATP5F1B,PHB2,BCKDHA,ATP6V0C,NDUFS2,FDX1,ATP6V1G1,SLC25A6,ATP5PB,PRDX3,ATP5MC2,ATP6AP1,OXA1L,ECH1,ATP6V0E1,UQCRC1,VDAC2,ATP5F1A,NDUFC1,ATP5F1C,MGST3,MDH2,ATP5PF,IDH2,SDHD,HADHA,SDHC,ATP5F1D,NDUFS3,LDHB,SLC25A11,GPI,ACADM,NDUFB3,MRPS22,DECR1,MDH1,NDUFB8,MRPL11,ACAA1,NDUFA5,PMPCA,PDHB,TOMM22,ETFA,BDH2,HSPA9,IDH3B,NDUFV1,GLUD1,TIMM10,COX5A,MRPL15,ATP5MG,UQCRC2,NDUFA6,NDU…	7.EMPP	NormalvsTrisomy21	2759
YAGI_AML_FAB_MARKERS	6.44109	2.84421086070374e-35	1.82961219332511e-33	193	RHAG,GP9,GP1BB,ITGA2B,DLC1,CTSW,LDLRAD4,VCL,IL2RG,MYO16,TRPC6,MAX,NR4A2,KEL,CFH,RYR3,CD164,GABRE,PDCD10,TPST2,S100A10,GJA4,AKR1C1,SNTA1,MAST4,LAMA5,PROS1,ZBTB16,CD68,ADAMTS3,ZMYND8,TPM1,CLCN4,ANXA5,CDC42BPA,GP1BA,ITGB3,ITGA6,SERPINI1,PIM2,PIR,NCAM1,NET1,KIF2A,CFP,SERPINH1,TOM1L1,ELOVL6,LGALS1,RUNX1T1,FAM20B,AP1S2,ULK2,TCIRG1,TBPL1,AOAH,ELL2,DRAP1,TJP2,USP8,MYL4,GAD1,CD58,TFDP2,BAMBI,F2R,CAV1,MED2…	6.EryMeg	Trisomy21vsGATA1s	3093
FORTSCHEGGER_PHF8_TARGETS_DN	6.44055	1.60778435564699e-44	1.4454562484142e-42	753	S100A4,S100A6,CD9,INF2,RABGAP1L,PTGS1,CCND3,UROD,GNAQ,KLF6,ILK,CCL5,LRP12,MICALL2,TMBIM1,CALM1,PPP1R12A,FUT8,AGPAT3,PTBP3,ARHGDIB,DNAJB6,FER,DCAF6,NFE2,EIF1AY,PPP1R18,TSPAN14,CPEB4,AGPAT4,OSBPL3,LGALS1,AMMECR1,LAT2,MPP1,ARHGAP1,AP1S2,PTPN12,CLASP2,ULK2,CMTM6,FCHO2,DCP2,CTNND1,VPS37A,ERC1,CEMIP2,RAB2A,MYLK,PPP1CB,ASL,WIPI1,ATP11A,ELL2,NEDD4L,ENY2,SNX29,F11R,SMYD3,ANKRD13A,CDV3,EHD1,SDCBP,GRB2,CIB1…	6.EryMeg	Trisomy21vsGATA1s	3092
WP_VEGFAVEGFR2_SIGNALING	6.43893	7.38873057156351e-40	7.4496376749237e-38	428	VCL,MEF2C,STAM,NR4A2,EIF4G2,LRRFIP2,ROCK2,PRKCB,ITGB1,ANXA1,TUBA1C,CTNNB1,TXNIP,MAP3K5,STAT1,IQGAP1,CLTC,EPB41,MAP2K4,NUMB,HERPUD1,MYH9,SYNJ1,PDE4DIP,PTPN1,EIF4G1,IGFBP7,DNAJA1,C15orf39,RHOC,BSG,MAP2K1,PRKCD,FYN,ARNT,CREBBP,NAPA,P4HB,TMOD3,NR4A1,MMP14,ITCH,PIK3R1,FRS2,ITGB3,TMSB4X,STAT3,HDAC5,PAK2,PRRC2C,ERN1,CTNNA1,BCL2L1,FAF1,COPG1,CAPZB,HDAC9,SDCBP,PTPN11,LUC7L,ATP6V0D1,GRB2,QKI,ROCK1,ABL1,STA…	7.EMPP	NormalvsGATA1s	3104
PARENT_MTOR_SIGNALING_UP	6.43875	1.82026890415671e-41	1.94014661341618e-39	548	EPB41L4A,ZMYND8,GLG1,AP3B1,CTNNB1,LTBP1,MAP3K5,DNAJC3,CITED2,NBAS,STAT1,IQGAP1,ATP6V0E1,BCAS3,PTPRA,TFPI,CTDP1,TANK,CPQ,PDE4DIP,JAK2,PDK3,PECAM1,USP47,MYO1D,ARNT,CHD4,DIP2A,CD63,MSH3,RANBP9,ATXN7L1,NCKAP1L,TBC1D9B,PIP5K1C,GNAS,PCDH9,PRRC2B,PTBP1,TSC22D3,TMBIM6,NSD1,PYGL,FAF1,GBF1,MADD,ATF7IP,PRKAR2A,COPG1,BNIP3L,ANO10,AKAP13,TBC1D22A,PRKAR1A,CRADD,RECQL,RNGTT,VPS13D,SKAP2,POLG,HECTD3,CDK12,PTPN6,…	7.EMPP	NormalvsGATA1s	3103
WIERENGA_STAT5A_TARGETS_DN	6.43623	8.32509955595551e-38	6.46149133244005e-36	188	PDLIM1,GP9,GP1BB,FCER1A,RBPMS2,ACTN1,TLN1,LDLRAD4,RUFY1,SLC37A1,RGS18,CD9,PLXDC2,FCER1G,SPX,LYZ,ILK,SLC9A9,GJA4,PECAM1,CD84,CAVIN2,MPL,EFHC2,CTDSPL,FERMT3,SLC22A23,PROS1,GCSAML,ROCK2,FAM30A,GP1BA,ALOX12,IL7,CLCN4,NINJ2,PPIF,STX11,USP20,SUSD3,DOK3,ANGPT1,PLCG2,PLEK,RASGRP3,ARHGAP21,MYLK,GNG11,SCPEP1,PDIA5,BAMBI,CAMK1,DNAAF3,CD47,LGALS12,EFNB2,SERPINF1,BANK1,CRACR2B,ETS1,DAAM1,CARD19,CORO1A,SH3BGRL…	6.EryMeg	NormalvsGATA1s	3175
PUJANA_ATM_PCC_NETWORK	6.43521	1e-50	1.69568181818182e-48	1325	KYNU,ITGA2B,TGFB1,CD36,IL2RG,ZNF804A,GNAQ,MAX,GYPE,PRMT2,CBFA2T3,LYN,JARID2,FCGR2A,AP3B1,RREB1,RCOR1,ACTR3,PDCD10,OSBPL3,STAT1,RUNX1,INPP5D,GPD2,TMEM131L,ABO,PIM2,PTPRC,NCF4,SP100,PDK1,IL7,EPB41,U2AF1,ACTR2,CENPC,APC,SPTLC2,NBEAL2,DCP2,RSRP1,TANK,ZNF273,SENP5,SYK,HMGN1,PPP6R1,HPS1,BTK,CTCF,BTAF1,PTPN1,RGS6,JAK2,PRDM2,MBNL1,DDX3X,TOP1,GP1BA,ZC3HAV1,PRKCD,TEC,UBE2E1,XPNPEP1,ARNT,YWHAB,AMMECR1,NFATC…	7.EMPP	NormalvsGATA1s	3102
GEORGES_TARGETS_OF_MIR192_AND_MIR215	6.43282	1.68916248333859e-46	2.37789458267721e-44	865	HERC2,MEIS2,MTSS1,IL1RAP,CHD7,ELL2,STAM,PPP1R12A,LIMS1,LRRFIP2,RHOBTB3,ITGB1,MACF1,MSN,PIM1,DNAJC3,RAB2A,OSBPL6,GPC4,C21orf91,RSRC1,CD164,IQGAP1,BMP2K,IL7,IFRD1,XK,ZMAT3,WWC2,ACTR2,APC,OSBPL8,ZNF273,SEMA4D,CMTM6,CTCF,TMEM164,DCBLD2,EHBP1L1,FAM20B,NCOA3,KIF5B,DDX3X,TOP1,CDKN2A,EDRF1,CDKN2D,MPZL1,ATG10,PTS,AMMECR1,ZC3H12C,TDG,GNAS,NSF,IGF1R,SLC19A2,SS18,DYRK1A,ZNF641,IL15,USP14,BMPR2,SIRT1,PITPNC1,…	7.EMPP	NormalvsGATA1s	3101
MARSON_BOUND_BY_FOXP3_UNSTIMULATED	6.42932	1e-50	1.165e-48	1153	TGFB1,FOSB,LIMD2,APLP2,TXNIP,ZFP36L1,TP53INP1,DNAJB6,ACTR2,DHRS3,LAMTOR1,ARPP21,RHOB,KLF6,EMP3,TRAPPC1,CITED2,TSC22D3,LAPTM5,RSRP1,JUNB,FCGR2A,TES,SEPTIN6,TPST2,FYB1,ITM2B,SLC39A3,YES1,TUBB4B,DOK2,SMAD3,HSP90B1,ADD1,VEZT,ARL4A,ORAI2,ARHGDIB,CDKN2D,C17orf49,LCP2,OS9,NDFIP1,STAT6,ARMC8,REST,PRKAR1A,POLR2A,TSC22D4,WASF2,HP1BP3,LRP10,PKM,CD84,MAPKAPK3,EIF5,CTDSP1,TAX1BP1,STK10,RNASEK,ARHGAP10,TGFBR2,…	5.EryP	NormalvsGATA1s	3622
HALLMARK_HEME_METABOLISM	6.42729	4.38384744441649e-35	2.74893022102822e-33	193	RHAG,GATA1,GYPB,ANK1,KEL,GYPE,MBOAT2,SELENBP1,DMTN,XK,CCND3,UROD,TRIM58,BACH1,CA2,NCOA4,SPTA1,BMP2K,UBAC1,NFE2,ICAM4,EPB41,EIF2AK1,GYPA,NUDT4,TENT5C,YPEL5,LRP10,SNCA,USP15,AGPAT4,CA1,DAAM1,SPTB,ADD1,MPP1,CLIC2,HBD,RNF19A,FECH,SLC10A3,FBXO34,SYNJ1,TRAK2,FN3K,ERMAP,ELL2,NNT,TMEM9B,MYL4,MKRN1,SDCBP,TAL1,LAMP2,TFDP2,RIOK3,TOP1,LPIN2,ATP6V0A1,DCUN1D1,HAGH,BNIP3L,KAT2B,MARK3,ABCB6,CAST,ALAD,CPOX,GCLC,B…	6.EryMeg	Trisomy21vsGATA1s	3091
WP_CYTOPLASMIC_RIBOSOMAL_PROTEINS	6.42634	4.73273061469319e-31	2.10212118135956e-29	88	RPS4X,RPS26,RPL7A,RPL12,RPS3,RPS14,RPL18A,RPL10,RPLP0,RPL19,RPL6,RPL28,RPL29,RPL8,RPS5,RPS2,RPL18,RPS12,RPL11,RPS15,RPL41,RPS28,RPS7,RPL3,RPL13,RPSA,RPL32,RPL30,RPL5,RPLP1,RPS8,RPL35A,RPL36,RPS13,RPS24,RPS3A,RPS27A,FAU,RPL10A,RPL24,RPS15A,RPS21,RPS19,RPS9,RPL26,RPS6KA1,RPS23,RPL22,RPL34,RPL15,MRPL19	5.EryP	NormalvsTrisomy21	2861
SCHLOSSER_SERUM_RESPONSE_DN	6.4262	1.71092852838051e-43	2.02622821432492e-41	684	LDLRAD4,BACH1,KIFAP3,RABGAP1L,CD55,PPP1R12A,PRKAR2B,FCGR2A,MAP3K5,HSPA5,PDCD10,GLUL,STAT1,CD164,RNF24,PIM2,PTPRC,SP100,IL7,MAP2K4,NPTN,ACTR2,SPTLC2,MICU2,RSRP1,NFE2,ZNF273,MORC3,TP53BP2,HMGN1,ATAD2B,LYZ,CD9,MBNL1,TAX1BP1,CLASP2,YWHAZ,ETS2,NCOA2,CREBBP,PJA2,NCKAP1L,SREK1IP1,GTF2E2,USP33,ZFYVE16,DYRK1A,ZNF217,PAK2,PRRC2C,HMGN3,EVI5,ABI1,DNAJB12,YME1L1,ADARB1,CAPZA1,KIDINS220,EP300,STK3,SDCBP,PTPN11…	7.EMPP	NormalvsGATA1s	3100
JOHNSTONE_PARVB_TARGETS_2_DN	6.42355	4.96771689841251e-37	3.43232439777353e-35	332	SESTD1,SLC44A1,PTP4A2,RANBP9,RREB1,PDGFC,NET1,SPRY1,NQO2,AGTPBP1,LNPK,RNF19A,ANGPT1,DCP2,CDYL,SLC5A3,ATP2C1,MYLK,MOB1B,GXYLT1,AGFG1,TOP2B,RAP2B,PDZD8,SLC16A7,ZDHHC2,OXR1,FAF1,BACE2,TMEM165,F2R,CRYZ,DCUN1D1,USP4,GLS,MYCBP2,GBE1,MCUR1,E2F3,EXOC5,MBNL1,MAP2,ATP5IF1,WAC-AS1,HIPK1,RFX7,GTF2A1,CCDC126,SOAT1,VPS13A,OSBPL8,HSPA1A,PPP2R5C,MAGT1,SLC30A5,RO60,CDK13,HSPA4,RCHY1,LEPR,PSMB2,CSNK1A1,HOOK3,COMMD…	6.EryMeg	Trisomy21vsGATA1s	3090
REACTOME_DEUBIQUITINATION	6.42204	7.68324982666036e-34	4.44437288422788e-32	238	TGFB1,PRKN,ACTB,SNX3,STAM,ADRM1,RHOA,SMAD3,USP20,PSMD6,USP15,ATXN7,VCP,UBC,MBD6,IKBKG,TAF10,APC,PSMA7,USP8,TNIP2,RIPK1,TADA3,UFD1,BABAM2,JOSD2,TRAF6,STAM2,ASXL2,SIAH2,IDE,INO80D,USP4,KAT2B,BIRC2,TGFBR2,EP300,MAVS,USP12,PSMD1,OGT,USP25,TNKS2,USP37,MCRS1,YOD1,USP7,ACTR8,PSMD2,SMAD2,USP33,NOD1,PSMD4,PSMB1,OTUD7B,HGS,MBD5,PSMA4,OTUD5,PSMB2,RNF135,SMAD1,UCHL3,PSMD11,USP48,USP47,USP14,USP34,USP24,PSMD8…	6.EryMeg	Trisomy21vsGATA1s	3089
MONNIER_POSTRADIATION_TUMOR_ESCAPE_UP	6.42098	3.78149724291764e-37	2.56454267565142e-35	402	PRKAR2B,NEAT1,SLC22A23,MAP4K4,BTAF1,LTBP1,SLMAP,NIPBL,TFDP2,GLS,ZMAT3,PTGS1,SMURF1,RBM25,HIPK1,MTR,TAOK1,TXNRD1,TSPAN14,GCLC,ATP2B1,SENP2,GATAD2A,NPLOC4,ETV6,G3BP2,CREBBP,CHD4,ATP2A2,USP20,DHX9,OXR1,GSR,TPM1,TFRC,CSNK1G1,PPP1R12B,XPO4,RRP12,CCL5,PTPN11,WIPF2,SLC10A3,ZNF267,PCYT1A,RAB8B,ILRUN,SSX2IP,EIF4G1,SREK1,GSPT1,MAN1A1,RAPGEF6,RAB35,RLIM,TXLNA,SMARCC1,ZFP91,ABLIM1,NEMF,OTUD7B,NHLRC2,PPM1L,AT…	7.EMPP	Trisomy21vsGATA1s	3223
HALLMARK_MITOTIC_SPINDLE	6.41913	3.45166109685516e-34	1.93604449492778e-32	199	PDLIM5,VCL,FLNA,KIFAP3,CDC42BPA,EPB41,RANBP9,SOS1,ARHGEF7,NET1,APC,MYH9,ABI1,CLIP2,PREX1,RICTOR,CCDC88A,WASL,CD2AP,SSH2,CLASP1,ARHGAP10,MID1,CKAP5,CEP192,HOOK3,PCM1,KIF20B,FGD4,ARFGEF1,ROCK1,KIF5B,CAPZB,ITSN1,RAB3GAP1,DLG1,ARHGAP5,TUBGCP3,DOCK2,RAPGEF6,GSN,TBCD,OPHN1,CDC42,PAFAH1B1,KLC1,RASA1,CNTRL,NCK1,ARHGEF11,BCL2L11,CLIP1,SMC4,WASF2,STK38L,NF1,ACTN4,YWHAE,ABL1,HDAC6,DYNC1H1,CENPJ,ATG4B,KIF1B,…	7.EMPP	Trisomy21vsGATA1s	3222
REACTOME_ANTIGEN_PROCESSING_UBIQUITINATION_PROTEASOME_DEGRADATION	6.41693	6.86059949393254e-38	3.68152601620452e-36	305	HERC2,PRKN,ZBTB16,RNF182,PJA2,TPP2,UBR4,ITCH,UBE2H,RNF19A,UBC,UBE2Q1,NPEPPS,TRIP12,CUL3,SMURF1,MKRN1,UBA6,LNPEP,BTBD1,HUWE1,FBXW7,AREL1,SIAH1,WWP1,UBE2E1,LONRF1,PSME4,RNF4,HERC1,HECTD1,SMURF2,FBXO11,UBE2W,SIAH2,KLHL2,MGRN1,FBXL20,NEDD4L,RNF115,FBXW11,PSMD1,UBE2K,KBTBD8,FBXW2,UBR1,UBE2Q2,UBE2G1,WSB1,UBE2J1,LNX1,FZR1,UBAC1,RBBP6,UBE2A,ANAPC11,MYLIP,FBXL3,RLIM,RNF19B,UBE3A,ANAPC10,UBE2D1,UBE4A,CBLB,…	5.EryP	Trisomy21vsGATA1s	3679
TIEN_INTESTINE_PROBIOTICS_24HR_DN	6.41493	1.34963250336426e-36	6.84823730788708e-35	203	HSPA5,AKR1C1,CD55,SQSTM1,PDIA3,HSP90B1,PJA2,TES,HERPUD1,RANBP9,RAB2A,UBE2H,BNIP3L,ARIH1,UBC,TFG,CALR,PNRC1,SDF2L1,ALDH3B1,PRNP,NFIL3,TXNRD1,SEL1L,NCOR1,AUH,CREB1,TMED7,TRAM1,LRRFIP1,PPP1R15A,ATF3,SH3GLB1,VASP,TANK,NUDT4,TMCO3,JAG1,COG5,MAN1A2,ATF2,STX5,HYOU1,ARF4,CSNK1A1,ATL2,FNDC3A,KLHL24,PDE8A,PDIA6,ARMCX3,LPIN2,MCTP2,CDK2AP2,IFRD1,ZNF236,PDIA4,CBX4,FTL,P4HB,WIPI1,TMED5,AFTPH,MBNL2,KAT6B,PPIB,S…	5.EryP	Trisomy21vsGATA1s	3678
PUJANA_BRCA1_PCC_NETWORK	6.41272	1e-50	1.24366666666667e-48	1557	KYNU,TGFB1,ITGA2B,IL2RG,MAX,GYPE,STK24,RABGAP1L,ZNF804A,PDCD10,CCND3,RGS10,ACTR2,ARPC3,GPD2,HPS1,NAA10,U2AF1,JARID2,ELF1,GP1BA,SNRPD3,PIK3CB,PDK1,ARPC2,PTBP3,KMT2C,BTK,PIM2,ARHGDIB,ALOX12,PTP4A2,ARPC4,RCOR1,RANBP9,RREB1,EPB41,FXN,CBFA2T3,KIF2A,PPP6R1,HMGN3,PLCG2,EIF1AY,SUB1,RGS6,ARNT,OSBPL3,MRPL23,HMGN1,ACTR3,SPTB,YWHAB,STRN,RABEP1,KIAA0930,SP100,SYK,BAX,XPNPEP1,R3HCC1L,RPL36AL,ABO,ZNF273,DCP2,TP…	6.EryMeg	Trisomy21vsGATA1s	3088
KEGG_RIBOSOME	6.41244	9.56844547520029e-31	4.19998471387909e-29	87	RPS4X,RPS26,RPL7A,RPL12,RPS3,RPL18A,RPL10,RPLP0,RPL19,RPL6,RPL28,RPL29,RPL8,RPS5,RPS2,RPL18,RPS12,RPL11,RPS15,RPL22L1,RPL41,RPS28,RPS7,RPL3,RPL13,RPSA,RPL32,RPL30,RPL5,RPLP1,RPS8,RPL36AL,RPL35A,RPL36,RPS13,RPS24,RPS3A,RPS27A,FAU,RPL10A,RPL24,RPS15A,RPS21,RPS19,RPS9,RPL26,RPS23,RPL22,RPL34,RPL15	5.EryP	NormalvsTrisomy21	2860
YAO_TEMPORAL_RESPONSE_TO_PROGESTERONE_CLUSTER_13	6.40971	7.37190246305464e-33	3.58443837042177e-31	174	ATP5PO,TKT,SUMO3,ANXA1,ECH1,TAGLN2,ATP5PF,NDUFV3,GPX4,MRPL52,NDUFA13,SNRPD2,HDDC2,CYBA,MRPL27,NDUFB8,NDUFS2,LGALS1,MICOS13,PPIB,RBM3,DBNL,MIEN1,TMED3,S100A6,FMC1,PCCB,S100A10,PARK7,MRPL28,NAA38,FIBP,CAT,TOMM5,PSMG4,PMPCB,PDCD5,PSME2,NDUFB5,EMC6,NDUFB11,GUK1,ROMO1,CUEDC2,IFNGR2,M6PR,ANXA2,MRPL11,CSRP1,DNAJC15,CD320,GTF2A2,NDUFC1,REEP5,UQCR10,UBE2M,ELOB,SF3B5,EIF4EBP1,TIMM8B,OGFR,DAP3,NCBP2,DPM3,AN…	5.EryP	NormalvsTrisomy21	2859
ACEVEDO_LIVER_CANCER_UP	6.40112	2.34601568238171e-47	3.39789025432196e-45	932	MTSS1,KIFAP3,ZFP36L1,RHOBTB3,ROCK2,RBPMS2,JARID2,ACTR3,JPT1,NBAS,PTBP3,RSRC1,IQGAP1,PIM2,TFG,TSPAN14,CD46,ATP6V0E1,SPNS1,ARHGAP12,RNH1,KLHL2,PTPN12,MICU2,S100A10,DCP2,RSRP1,TRIP12,CPQ,SPPL2A,PTTG1IP,TP53BP2,LYZ,CTCF,BTAF1,CD9,IGFBP7,TMEM245,ITFG1,FKBP5,PECAM1,SELENBP1,F11R,PDGFC,MYLIP,YPEL5,CTSH,LTN1,CREBBP,PPP2R5A,WDR11,ANKMY2,UBE2Q1,USP8,TXNRD1,NGLY1,WDR26,CCDC91,WDR41,ITPR2,CCL5,LRRC8D,ABHD5,I…	7.EMPP	NormalvsGATA1s	3099
REACTOME_DISEASES_OF_SIGNAL_TRANSDUCTION_BY_GROWTH_FACTOR_RECEPTORS_AND_SECOND_MESSENGERS	6.40078	1.8070712006777e-41	1.13268437696261e-39	457	TGFB1,ITGA2B,VCL,TLN1,MSN,BIN2,YES1,IQGAP1,LYN,SMAD3,SQSTM1,LMNA,STAT1,TPM3,PPP1CB,PTPN6,AP3B1,PTEN,CTNNB1,PIK3CA,HDAC5,MYH9,UBC,TFG,STAT5A,TGFBR2,CLTC,PIK3CB,BRAF,QKI,MCL1,VCP,STAT5B,POLR2A,SEL1L,TRIM24,NCOR1,STRN,EP300,CREB1,PRKAR1A,PTPN12,ZC3HAV1,MARK3,KRAS,APBB1IP,RANBP2,EIF2AK3,TNKS2,RICTOR,LRRFIP1,SHOC2,CPSF6,FBXW7,ETV6,APC,ZMYM2,BIRC6,CUX1,FXR1,TBL1XR1,DCTN1,MAML3,GOLGB1,PPP2R5A,JAG1,MAP2K…	5.EryP	Trisomy21vsGATA1s	3677
UDAYAKUMAR_MED1_TARGETS_DN	6.39966	1.22313579039362e-36	6.2488834661274e-35	234	SLC2A3,DNAJB6,PTTG1IP,TNFSF9,LAMA5,TFPI,RSRP1,RHOB,TXNIP,FMNL1,RHOC,ELF4,DYRK1A,PTEN,GNAS,SPAG9,GADD45B,PPP1R12A,PHLPP1,CDKN1C,TMBIM1,AGAP1,ETS2,ARL4A,MAP1LC3B,EIF2AK3,RIOK3,ZMYM2,MAPKAPK2,ATF3,MTCL1,WASL,CITED2,FAM13B,GABARAPL1,PIM1,HERC1,GSN,NR1D2,KHSRP,KDM3A,NEDD4L,SPCS3,LXN,TLE3,PTBP2,KLHL24,RYBP,EFCAB14,TRIB1,MKNK2,IFRD1,FEM1C,ADAM17,RAB3GAP1,DENND3,ZZEF1,JUNB,OGA,PRRC2B,HBP1,MAP7D1,ATG14,NF…	5.EryP	Trisomy21vsGATA1s	3676
REN_ALVEOLAR_RHABDOMYOSARCOMA_DN	6.39305	9.02894864354661e-42	8.73697355104751e-40	407	TGFB1,PDLIM5,TIMP1,APLP2,TAGLN2,CST3,ACTN1,TLN1,CD151,GNAI2,ATP6V0E1,ARPC3,MSN,LY6E,S100A10,S100A6,RHOC,SH3BGRL3,ARPC1B,WDR1,CLIC1,IGFBP7,TPST2,NUCB1,GSN,ACTR2,IQGAP1,ARPC5,CAPZB,ANXA1,CORO1B,CAP1,RHOA,KLF2,AP2M1,RAB5C,LPP,REEP5,TMEM50A,CMTM6,MYH9,JAK1,GRN,MFSD1,LAMP1,ATP6V0D1,THBS1,ELF4,LXN,STAT6,BCAP31,SEMA3C,SLC10A3,PRR13,MMP14,VKORC1,WIPI1,DCBLD2,SCP2,OSBPL3,MYLK,TSPO,SKAP2,SNAP23,FXYD5,SCPEP…	6.EryMeg	NormalvsGATA1s	3174
REN_ALVEOLAR_RHABDOMYOSARCOMA_DN	6.39212	2.55573958942731e-39	1.47777221686343e-37	407	PDLIM5,TGFB1,TIMP1,KLF6,APLP2,TLN1,ACTN1,ACTR2,MSN,CST3,IQGAP1,SMAD3,TAGLN2,ELL2,JAK1,PDGFC,GNAI2,RHOC,ELF4,MBNL1,PTEN,LPP,KLF2,MYH9,SPAG9,TMOD3,TGFBR2,B4GALT1,FNDC3B,LAMP2,SH3BGRL3,ARPC1B,RAB1A,S100A10,PLEKHB2,ARPC3,CAPZB,TPST2,LAMP1,SKAP2,RAB5C,CLIC1,CORO1B,GRN,NPTN,ANXA1,TPP1,DCBLD2,CREB3L2,CD151,ATG5,ANXA5,NUCB1,DUSP1,GABARAPL1,SLC10A3,OSBPL3,SMURF2,ACADVL,CLIP1,GSN,AMMECR1,CMTM6,ARF4,PRKD1,S…	5.EryP	Trisomy21vsGATA1s	3675
SCHAEFFER_PROSTATE_DEVELOPMENT_6HR_DN	6.38819	1.39864706154812e-37	9.66102507328611e-36	449	AUTS2,COL23A1,MBOAT2,KMT2C,DHRS3,NR4A2,ZMYND8,ITGB1,CLTC,RCOR1,RSRC1,TET2,ATAD2B,RFX7,NCOR1,GPD2,PDZD8,LPP,ZNF644,HSP90B1,KANSL1,DNAJB11,SEPTIN7,BAZ2B,TAOK1,TAX1BP1,PUM1,FRYL,CD2AP,TNRC6A,NUFIP2,SENP2,ARHGAP10,SPPL3,KRAS,KDM5D,TNRC6B,GIGYF2,CEMIP2,CREBBP,WNK1,CHD4,MACO1,MICU2,GSR,CHD9,PIKFYVE,GOLGA4,SMG6,PRRC2C,PTPN11,PHF6,PSAP,SSH1,KDM3B,EIF3J,QRICH1,GBF1,GSPT1,DCTN4,STRN3,TXLNA,GOLIM4,WAC,FURIN…	7.EMPP	Trisomy21vsGATA1s	3221
JOHNSTONE_PARVB_TARGETS_2_DN	6.38314	2.85505637243085e-38	1.56587246190895e-36	332	SESTD1,AGTPBP1,ATP2C1,PDGFC,RANBP9,OSBPL8,MBNL1,SPRY1,GLS,RNF19A,STAG1,STK17B,PTP4A2,AGFG1,NUFIP2,NET1,E2F3,DCUN1D1,MOB1B,RREB1,DCP2,MYCBP2,FXR1,TBL1XR1,OPA1,RFX7,FOXJ3,HIPK1,SEC24B,CDK13,SMURF2,HOOK3,AKIRIN1,CDYL,PNRC2,MAGT1,USP34,TOP2B,CSNK1A1,NUP153,STK17A,C6orf62,KCTD20,TM9SF3,GBE1,USP4,PDZD8,UBE2G1,IFRD1,SSBP2,OXR1,KPNA6,XRN1,SLC5A3,CLIC4,GALNT7,CCDC126,RASA2,C1GALT1,FAF1,RAP2B,LNPK,GMDS,MAP…	5.EryP	Trisomy21vsGATA1s	3674
PARENT_MTOR_SIGNALING_UP	6.37974	5.03204002796494e-43	3.33017640445809e-41	548	EPB41L4A,CD63,PDE4DIP,IQGAP1,TFPI,DNAJC3,STAT1,PTPN6,RANBP9,AP3B1,GNAS,CTNNB1,SPAG9,BNIP3L,CTNND1,AMBRA1,PNRC1,NCKAP1L,NPEPPS,PIAS1,TMBIM6,NBAS,PRKAR1A,CTDP1,AKAP13,SKAP2,GLG1,BRWD1,ZMYND8,SYNE2,ATF7IP,RDX,TANK,CITED2,MYO1D,USP47,FARP1,NSD1,TNRC6B,GABARAPL1,BCAS3,CPQ,ARNT,PIP5K1C,PTPRA,AP2A2,MAP3K5,HELZ,MYO9B,USP34,CHD4,PRKD1,CSNK1A1,MSH3,ATP6V0E1,CNNM2,DIP2A,SULT1A2,HPS4,JAK2,ZER1,CDK12,RNGTT,TB…	5.EryP	Trisomy21vsGATA1s	3673
WANG_LMO4_TARGETS_DN	6.37884	8.38341402403684e-39	4.73726403070385e-37	347	U2AF1,NEAT1,ACTR2,B2M,PSAP,IQGAP1,HLA-B,RABGEF1,CDC42,UBR4,AP3B1,ITCH,TMOD3,CPEB2,ATAD2B,IRF9,DUSP23,CTNND1,PIK3CB,AFF4,EXOC4,BZW1,BAZ2B,RBM25,TRIP12,PLEKHB2,NUFIP2,NRBP1,UBA6,ARFGEF2,MKLN1,RICTOR,SCFD1,MAPK6,SH3GLB1,GGNBP2,WASL,FXR1,RDX,RAB11FIP1,C17orf49,USP47,TOP1,UBQLN1,COG5,LONRF1,MACC1,PAK2,USP8,ACSL3,RAB14,ATP6V0E1,TMEM64,EPC1,TDG,LXN,SAR1A,FBXW11,ATP6AP1,DYNC1LI2,RAB18,RNFT1,WDR41,PDZD8,U…	5.EryP	Trisomy21vsGATA1s	3672
YAO_TEMPORAL_RESPONSE_TO_PROGESTERONE_CLUSTER_17	6.37411	1.50026846606483e-30	1.1308084135127e-28	183	TPM4,GSTP1,IMPDH2,DDOST,LAMTOR1,EIF1AX,PHB2,ERP29,SRSF9,RPN2,RNF7,PUF60,ADSL,MARCKSL1,MRPS7,UBE2S,EVL,ABRACL,LRPAP1,TALDO1,TWF2,PTDSS1,CKB,MDH2,LSM7,PSMD8,FKBP1A,ERH,DDX54,EIF4E2,NDUFS3,CRYGD,CSNK2B,PSMG1,ALDH9A1,TUBB,UBA1,PRELID1,EIF4A3,UFC1,LYPLA1,SERF2,MRPL21,TMED10,PSMA7,MRPS22,SLC39A9,COPE,YJU2,CENPB,YIPF5,HSD17B12,CIAO2B,NDUFB9,TOR2A,TGFB1I1,FUCA1,URI1,DCTN2,SMDT1,PSMB6,GNG10,TPP1,AKT1,TIMM…	7.EMPP	NormalvsTrisomy21	2758
BENPORATH_MYC_MAX_TARGETS	6.3722	2.5817086769224e-38	1.56623659733292e-36	738	RPS26,FTH1,RPL19,SOD1,CCT8,RPL8,SERP1,FABP5,RPS5,RPL18,CPSF1,LSP1,MAT2A,ATP5F1B,PHB2,CCT7,EIF3K,TAGLN2,RPL13,ATP5MC2,PSMG1,TUBA1B,NACA,OAZ1,RPL32,MFNG,IER2,RPL5,RPLP1,SNX5,RAC2,TRAP1,PTPN6,BCKDHA,ZNF593,KEAP1,PKM,CSF2RB,NME1,CTSC,EIF3I,SRSF7,PSMD8,CYBA,NDUFB2,GPSM3,RNPS1,PSMC5,PLA2G6,RPS13,SRSF5,RPS27A,ARRB2,PSMB5,USP11,SCAND1,HAX1,UBXN1,ABT1,RBM15B,PIGP,XRCC6,PRDX5,HNRNPUL1,PTOV1,CDK6,AIMP2,HTRA…	5.EryP	NormalvsTrisomy21	2858
BLALOCK_ALZHEIMERS_DISEASE_DN	6.36818	1.36453312454637e-38	1.56648402697923e-36	1223	RPS26,GAPDH,BHLHE40,SRSF5,ETS2,LAPTM4B,SOCS2,SLC25A5,HINT1,SPINT2,SON,KIT,ATP5PO,APP,SLC25A3,ATP5F1B,DDOST,EIF5,DDX5,PHTF1,HLA-B,HSPA8,EIF3K,ADH5,CNOT7,APEX1,GNAS,TTC3,PMPCB,CAPNS1,PGK1,RPN2,EID1,ATP6V0C,SNX3,PDE4B,NDUFS2,HNRNPK,ARF5,PTS,SLC25A6,SUMO2,ACOT2,MRPL57,TUBB4B,ATP5PB,PRDX3,B2M,BCL7B,ATP6AP1,RPL6,FAM32A,ECH1,MYL12B,SEPTIN6,UQCRC1,TPI1,VCP,ATP5F1A,MOAP1,NRIP1,YWHAB,HOPX,GUK1,ENSA,GMPR2,A…	7.EMPP	NormalvsTrisomy21	2757
CUI_TCF21_TARGETS_2_DN	6.36573	1e-50	1.165e-48	830	IL2RG,PLXDC2,TXNIP,NCOA4,AHNAK,ATP2A3,INF2,LYZ,SLC2A3,TP53INP1,DNAJB6,VCL,LIMS1,ANXA1,NFKBIA,NEAT1,CD55,PDE4DIP,CBFA2T3,MED12L,TMBIM1,PARD3B,LPP,WWC2,ELL2,NID1,STAT1,SON,CITED2,NPL,PTGER4,MTSS1,PLEKHG1,JAK1,CELF2,MEF2C,NRROS,YES1,NFIL3,CPEB4,CDKN1C,FGD4,MYADM,MIR22HG,MACF1,ARMC8,PBX2,SPTLC2,PPP1R16B,SGMS1,IRF2BP2,YPEL5,RABGAP1L,MERTK,ADGRE5,MTCL1,ITSN1,ZBTB46,TGFBR2,MALT1,HEATR5B,SGK3,PTPRC,MYO1D…	5.EryP	NormalvsGATA1s	3621
REN_ALVEOLAR_RHABDOMYOSARCOMA_DN	6.36429	8.05570712943835e-41	5.26871511904318e-39	407	PDLIM5,TGFB1,TIMP1,TLN1,APLP2,GNAI2,MSN,TAGLN2,ACTN1,CST3,ANXA1,ACTR2,ARPC1B,IGFBP7,KLF6,S100A10,KLF2,IQGAP1,CD151,LPP,ELL2,SH3BGRL3,ARPC3,DUSP1,NUCB1,CLIC1,LAMP1,TPST2,RHOC,JAK1,RAB5C,ATP6V0E1,ELF4,CORO1B,SMAD3,GRN,STAT6,LY6E,P4HB,SLC10A3,MYH9,CAPZB,ARHGDIA,ATP6AP1,PDXK,TGFBR2,MFSD1,CMTM6,ARPC5,B4GALT1,ANXA2,WDR1,TSPAN4,ACADVL,AP2M1,BCAP31,ATP6V0D1,ATG5,SKAP2,SEMA3C,PRKD1,TPP1,CREB3L2,OSBPL3,ANX…	5.EryP	NormalvsGATA1s	3620
REACTOME_REGULATION_OF_EXPRESSION_OF_SLITS_AND_ROBOS	6.36158	5.66686684338019e-33	2.7819842358752e-31	172	RPS4X,RPS26,RPL7A,RPL12,RPS3,RPS14,RPL18A,RPL10,RPLP0,RPL19,RPL6,RPL28,RPL29,RPL8,RPS5,RPS2,RPL18,RPS12,RBM8A,RPL11,RPS15,PABPC1,RPL22L1,RPL41,RPS28,RPS7,RPL3,RPL13,RPSA,RPL32,RPL30,RPL5,RPLP1,RPS8,PSMF1,RPL36AL,RPL35A,RPL36,PSMD8,RNPS1,PSMC5,PSMB8,RPS13,RPS24,RPS3A,UBB,RPS27A,PSMB5,FAU,RPL10A,RPL24,PSMD13,PSMD3,RPS15A,PSMA7,PSMD7,PSME2,EIF4A3,RPS21,EIF4G1,PSME1,PSMD6,RPS19,ELOB,RPS9,PSMD4,RPL26,…	5.EryP	NormalvsTrisomy21	2857
REACTOME_M_PHASE	6.3462	2.15704475129766e-35	1.41191823984063e-33	352	TUBA1C,LMNA,PRKAR2B,PRKCB,TUBB1,PSMD6,KIF2A,UBC,TUBB2A,CLASP2,PPP2R5A,CHMP4B,RAB2A,DYNC1I2,RAB1B,PSMA7,PRKACA,ANAPC11,BLZF1,TUBB4B,CKAP5,CHMP2A,TAOK1,SSNA1,YWHAE,CHMP4A,RB1,DCTN1,SPAST,LPIN2,DYNC1I1,DYNC1LI2,NUMA1,CTDNEP1,NUP210,CHMP3,MAPK1,PPP2CB,MAPRE1,PSMD1,DCTN2,NDEL1,PPP2R5C,CENPJ,CHMP6,SDCCAG8,PSMD2,CENPK,XPO1,PSMD4,PSMB1,GORASP1,PSMA4,PSMB2,VRK2,SMC1A,PSMD11,CSNK2A1,CEP192,BANF1,TUBGCP3,TU…	6.EryMeg	Trisomy21vsGATA1s	3087
MILI_PSEUDOPODIA_HAPTOTAXIS_DN	6.33678	1.46624825600055e-33	1.31821017906941e-31	674	LAPTM4B,RPLP0,CD34,ZFP36,SON,RACK1,DDOST,MBOAT7,HLA-B,CSF1,BTG2,RPL8,PHB2,PTTG1IP,PIM3,ITM2C,PUF60,SYNGR2,TMEM259,DUSP1,TAF1D,CTSD,TTC7A,CMTM6,MFSD10,HLA-A,CD81,ATP5MC2,ATP6AP1,NFKBIE,VCP,CRTAP,DPF2,YIPF3,GRN,CTR9,CDIP1,OBSL1,CDIPT,RER1,ZDHHC24,BCAP31,TMED9,ERGIC1,MGAT1,MYADM,CD47,SREBF1,PIGS,RPL12,MGAT2,DRAM1,TNFRSF21,CHST14,TMED10,JAGN1,CYB561D2,CD151,SCAMP2,TMEM101,TNFRSF1B,RNPS1,TSPAN4,MFSD1,…	7.EMPP	NormalvsTrisomy21	2756
REACTOME_ASPARAGINE_N_LINKED_GLYCOSYLATION	6.33635	5.40588760856432e-35	4.03333274474984e-33	297	ANK1,CD55,TRAPPC10,TUBA1C,CTSA,PDIA3,NPL,TFG,SPTA1,RPN1,FUT8,VCP,PPP6R1,UGGT1,CTSZ,CTSC,B4GALT1,TUBB1,TUBB4B,NAPG,NUS1,TRAPPC1,NGLY1,NAPA,NSF,COG5,FUCA1,ARF3,MAN2A1,MGAT5,SCFD1,GOLGB1,GBF1,CAPZA1,COPG1,CAPZB,ARFGAP1,DCTN1,MGAT4B,CAPZA2,STX5,ARFGAP3,DYNC1LI2,DYNC1H1,MAN2A2,CSNK1D,RENBP,HK1,TUBB2A,DYNC1I2,CMAS,SEL1L,TRAPPC9,ANKRD28,NEU4,GMDS,COG6,ST3GAL3,UGGT2,SPTB,DYNC1I1,DHDDS,RPN2,OS9,MGAT3,TMED…	7.EMPP	NormalvsGATA1s	3098
GRYDER_PAX3FOXO1_ENHANCERS_IN_TADS	6.3301	2.36818513905297e-47	3.39789025432196e-45	990	STXBP5,HERC2,CRPPA,DNM3,MEIS2,MYO18B,IL1RAP,CHD7,IRX1,AUTS2,ZFP36L1,ZNF804A,SGMS1,STK24,LRRFIP2,ITGB1,DNAJB6,USP15,JARID2,MAP4K4,RPS6KC1,UBR3,CITED2,MED13L,GLUL,ACSL3,RUNX1,GSE1,TMEM131L,NCOA1,NLGN1,WDR1,CNOT2,ARHGAP12,TFPI,CDYL,SPRY1,PTPN12,PREX1,DCP2,CTNNBL1,TANK,FOXN2,MYH9,VTI1A,PDE4DIP,PTTG1IP,SYTL3,MYCN,ATAD2B,BTAF1,CD9,VPS13B,ZNF644,COL18A1,ATP9B,KIF5B,SNX29,TOP1,NCAM1,ABCD3,RALA,YWHAZ,F11R…	7.EMPP	NormalvsGATA1s	3097
YAGI_AML_FAB_MARKERS	6.32902	2.18818328822151e-36	1.55277654100366e-34	193	RHAG,GP9,GP1BB,CTSW,ITGA2B,IL2RG,DLC1,VCL,LDLRAD4,TRPC6,MYO16,MAX,CFH,S100A10,LGALS1,CD164,NR4A2,GABRE,TPST2,PIM2,GJA4,KEL,SNTA1,ZBTB16,LAMA5,ITGA6,AKR1C1,PROS1,PDCD10,GP1BA,ZMYND8,CD68,MAST4,SERPINI1,CLCN4,NCAM1,SERPINH1,PIR,TCIRG1,ITGB3,CFP,ADAMTS3,TOM1L1,ELOVL6,F2R,RUNX1T1,DRAP1,CDC42BPA,ICAM2,TPM1,NET1,AP1S2,CD58,ULK2,FAM20B,BAMBI,PLA2G6,ANXA5,TBPL1,IL10RB,KIF2A,GAD1,ANXA2,ELL2,CAV1,PCCB,ACO1…	6.EryMeg	NormalvsGATA1s	3173
MARSON_BOUND_BY_FOXP3_STIMULATED	6.32714	1e-50	1.165e-48	950	LIMD2,APLP2,HCST,ZFP36L1,BACH1,CCND3,ARPC1B,OAZ1,PDIA3,KLF6,GADD45B,CITED2,RSRP1,JUNB,PTGER4,TES,SEPTIN6,CLIC1,TPST2,FYB1,PIM1,ITM2B,HSP90B1,ADD1,ORAI2,ARHGDIB,CTSD,GMFG,LCP2,OS9,PTBP3,NDFIP1,NRBP1,STAT6,ARMC8,REST,CSRNP1,SUN2,WASF2,APBB1IP,HP1BP3,LRP10,RABGAP1L,MAPKAPK3,EIF5,CSF1,HCLS1,ARHGAP10,PTPRC,ARHGAP12,ABHD2,CMPK1,CSK,CTSC,PER1,OSBPL8,CERS2,PRRC2A,PDK1,ROCK2,NFKBID,TGOLN2,NCOA3,SERF2,PGK1…	5.EryP	NormalvsGATA1s	3619
TONKS_TARGETS_OF_RUNX1_RUNX1T1_FUSION_HSC_DN	6.32648	1.90452705379676e-34	9.53030450544206e-33	190	PDLIM1,ITGA2B,FCER1A,LAT,ZBTB16,TESC,TYROBP,GATA1,C15orf39,NCF4,HDC,PLP2,ACTN1,SLC7A5,BIN2,CCND3,CD55,CBFA2T3,S100A4,SH3BGRL3,LAPTM5,LDLRAD4,FCGR2A,ABCC4,HBG1,SPI1,FLOT2,MYCN,LGALS1,TSC22D1,LAT2,ANK1,ELOVL6,CD33,DOK2,LCP2,CSF1,ZFP36L2,STK10,PDXK,SLC16A3,PIK3CB,MBP,BCOR,DMTN,C11orf21,XK,APOBR,PLAC8,GSE1,PRKCD,PTPN12,TFR2,SETX,NFE2,CSF2RB,ZNF787,RASSF2,SELPLG,SLA,ITGA6,XYLT1,BIRC3,FADS2,TRAF4,IL7,F…	5.EryP	NormalvsGATA1s	3618
JIANG_MELANOMA_TRM1_CD8	6.32169	7.34257505563302e-35	3.48842467133546e-33	174	KLF6,MALAT1,NR4A2,SLC2A3,HSPA5,DNAJB6,CD55,TNFSF9,SQSTM1,LMNA,YPEL5,ELF1,FOSB,RSRP1,TAGLN2,PTGER4,CSRNP1,AHNAK,GADD45B,RASGEF1B,NFKBIA,RNF19A,REL,UBC,STK17B,PNRC1,FOS,EZR,MCL1,KDM6B,SYAP1,ZFP36,TENT5C,TIPARP,RANBP2,PPP1R15A,CEMIP2,ANXA1,MYADM,CITED2,DUSP1,GABARAPL1,IER2,PIK3R1,EML4,SDCBP,DDX3X,RGCC,RALGAPA1,TUBA1A,TNFAIP3,NEU1,STAT3,EIF5,TUBB4B,WSB1,NR4A1,SERTAD1,ZFAND5,JUNB,BTG2,IDS,GTF2B,NR4A3,…	5.EryP	Trisomy21vsGATA1s	3671
PHONG_TNF_RESPONSE_VIA_P38_COMPLETE	6.31841	3.98979372765373e-35	1.91999170416576e-33	223	BACH1,HLA-B,KLF10,WWC2,S100A4,CCNL1,SPAG9,ATP2B1,PPP1R12A,B4GALT1,ARHGAP12,ELOVL6,FOS,KDM2A,ARID4B,MCL1,ITSN2,KDM6B,SMURF1,TRIM24,ETS2,OBSL1,NCOA2,FBRS,TUT7,ZFP36,PTPN12,GLG1,ZMYND8,PPP1R15A,ATF3,CUX1,MLXIP,NUDT4,JAG1,GABARAPL1,MAP4K4,SDCBP,AFF1,PNRC2,ACSL3,PRKD1,DERL2,MBP,BCL3,STK17A,NEO1,PHIP,AP1G2,DDIT3,NINJ1,MAP3K11,MID1,MAFG,RPRD2,EVA1B,PTGS2,MKNK2,SSBP2,SLC5A3,ADAM17,UBE2J1,CBX4,ZNF131,ITGA…	5.EryP	Trisomy21vsGATA1s	3670
MOOTHA_MITOCHONDRIA	6.31732	7.20603224794243e-30	5.22052549846082e-28	442	SLC25A5,CYB5R3,ATP5PO,APP,SLC25A3,ATP5F1B,RAN,CNOT7,GNAS,PMPCB,BCKDHA,NDUFS2,FDX1,MRPL57,IMP3,ATP5PB,PRDX3,MRPS7,ATP5MC2,OXA1L,UQCRC1,VDAC2,UCP2,HAX1,TXN2,NDUFC1,ATP5F1C,MDH2,TUFM,ATP5PF,IDH2,SDHD,FIBP,SHMT2,FPGS,TNFSF10,HADHA,SDHC,BCL2L1,MRPS2,ATP5F1D,NDUFS3,DUT,SLC25A32,G6PD,SLC25A11,MRPL9,CLN3,TBCB,MRPS27,TFAM,ACADM,BID,NDUFB3,ALDH2,MRPL46,MRPS22,MRPS17,DECR1,HTATSF1,NDUFB8,ACADS,MRPL22,MRPL11…	7.EMPP	NormalvsTrisomy21	2755
REACTOME_CYTOKINE_SIGNALING_IN_IMMUNE_SYSTEM	6.3136	1.50084916031326e-47	1.43465786401226e-45	744	TGFB1,TIMP1,IL2RG,FLNA,IL1RAP,STXBP2,TUBA1C,HLA-B,MSN,B2M,TNFSF9,PTPN6,CD4,FOS,ANXA1,LAMA5,NFKBIA,HLA-A,STAT5A,SQSTM1,TALDO1,MAP3K8,STAT1,JUNB,HLA-C,JAK1,PIM1,MEF2C,RELB,IRF9,DNAJC3,YES1,TUBB4B,SMAD3,HSP90B1,STAT6,INPP5D,SP100,PAK2,P4HB,MAPKAPK3,SOD2,RALA,CSF1,EIF4G2,LYN,JUN,HSPA8,IRF7,JAK3,SYK,CD70,IFNAR1,PIK3CB,MAP2K1,ANXA2,CSK,PIK3R1,EIF4G1,ICAM1,NCAM1,STAT5B,EGR1,NFKB2,UBC,PRKCD,NFKB1,PTPN12,…	5.EryP	NormalvsGATA1s	3617
NUYTTEN_NIPP1_TARGETS_DN	6.31157	1.05701363850165e-44	1.33667436556962e-42	825	DLC1,TGFB1,VCL,DHRS3,EIF4G2,SLC40A1,ROCK2,MBOAT2,PRMT2,PLP2,MAP4K4,DIPK2A,RAB10,LAMA5,TXNIP,INF2,PDCD10,PDZD8,LPP,ACSL3,OSBPL3,PACSIN2,RUNX1,BMP2K,NCOA1,GALNT10,XK,MAP2K4,GTDC1,SPTLC2,PREX1,S100A10,DCP2,SYK,PTTG1IP,CMTM6,SLC44A1,PPP2CB,FER,NUDT4,ORC4,TENT5C,CTSZ,TMEM245,EHBP1L1,DNAJA1,B4GALT1,KLF2,ATP2A3,TUBB1,PECAM1,TUBB4B,AP2B1,MYO1D,KLF11,ARNT,GNAI2,SLC12A6,MALT1,AMMECR1,PJA2,AHNAK,NFATC3,STK1…	7.EMPP	NormalvsGATA1s	3096
ACEVEDO_LIVER_TUMOR_VS_NORMAL_ADJACENT_TISSUE_UP	6.30732	3.524047426426e-34	3.41512232415465e-32	832	RPS4X,SERPINB1,RPLP0,ILF2,CCT8,PECAM1,UBB,SEC61B,HLA-B,EIF3F,LAMTOR1,APEX1,MAP2K2,AHCY,CSTB,PTTG1IP,PGK1,SERP1,MAPKAPK3,NUCB2,DDAH2,ATP6V0C,RPS5,GBP4,TUBB4B,SNRPB,USP11,UBE2S,MAN2B1,VPS28,OXA1L,RPL36AL,TINF2,ATP6V0E1,BTF3,TUBA1C,WDR45B,TWF2,HAX1,RTRAF,MYLIP,GRN,HLA-C,HSP90AB1,CHMP1B,MGST3,CTR9,S1PR1,CYYR1,TAGLN2,PPP1CA,CTCF,EMC4,MRPS21,KLF13,CYBC1,SLC35E1,OSTC,IL10RB,SNU13,SDHC,SF3B4,PSMB5,RPS7,N…	7.EMPP	NormalvsTrisomy21	2754
FOSTER_TOLERANT_MACROPHAGE_DN	6.30699	2.15278092338164e-38	1.20733781259426e-36	413	PDLIM5,CHD7,TNFSF9,LUZP1,COL18A1,MED13L,LMNA,JARID2,ARMC8,CD83,CSRNP1,TAB2,ATP9B,HDC,MAP3K8,REL,LCP2,F11R,STAT5A,SGK3,FOS,EZR,FKBP5,S100A10,KLF7,NFIL3,NFKB1,TRA2A,SERPINE1,ARL4A,TUT7,TET2,VEZT,ZFP36,MAP2K4,TIPARP,RANBP2,CHD1,LRRFIP1,ETV6,CEMIP2,DCP2,AREL1,HIVEP2,MYADM,CITED2,ZNF800,GNB4,TMCO3,DENND6B,NECTIN2,NOCT,PIM1,SEC24B,TLK2,TOR1AIP2,CCND2,AFF1,USP12,MALT1,CMTM6,ARF4,MTMR14,FMR1,BCL3,MAPKBP1…	5.EryP	Trisomy21vsGATA1s	3669
IVANOVA_HEMATOPOIESIS_MATURE_CELL	6.30474	2.14642047568927e-36	1.07450673343398e-34	289	RHAG,LIMS1,MTSS1,KEL,YPEL5,FYB1,TFDP2,CCND3,ANKRD9,WDR26,RNF19A,BNIP3L,CTSH,BMP2K,CPEB4,SLC22A23,GYPA,STK17B,MPP1,PIK3CB,LAMP2,AGFG1,SERTAD2,MKRN1,PPP3R1,SYAP1,CDKN2D,LAMP1,TENT5C,RAB6A,ADD1,EHBP1L1,ATP6V0A1,KLF11,SPTA1,STX11,RIOK3,SLC66A2,GPCPD1,CHP1,NUDT4,FBXO34,TNRC6B,NOCT,SDCBP,SPECC1,HECTD1,AP2A2,TRAK2,SYNJ1,DERL2,RNF167,USP7,TAPT1,RELCH,RBMS1,GRINA,MXD1,GRIPAP1,CPD,LMTK2,ARL6IP1,USP25,GOLIM…	5.EryP	Trisomy21vsGATA1s	3668
REACTOME_MEMBRANE_TRAFFICKING	6.30451	3.41950766826517e-46	4.54977707790068e-44	620	TUBA1C,DNM3,ANK1,TRAPPC1,ARPC3,ACTB,KIFAP3,STON2,CD4,ARPC2,CTSZ,GJA4,HPS1,ACTR2,RHOBTB3,ARPC5,PPP6R1,CAPZB,ARF3,CD55,DENND6B,AP2M1,YWHAB,VPS28,AP1G2,AGPAT3,TUBB1,RAB5C,CTSC,RAB8A,CALM1,RIN3,NAPA,VPS25,TRAPPC10,MYH9,COPE,NAA38,RAB10,ARPC4,RAB1B,RAB11B,FNBP1L,YWHAH,STAM,FTH1,SPTA1,HSPA8,M6PR,PIP5K1C,DNM2,SYNJ1,TUBB4B,ACTR3,PLIN3,YWHAZ,YWHAE,ARPC1A,AP3S1,SPTB,AP1S2,TMED9,SNAP23,TBC1D10C,RAC1,AP2S1,D…	6.EryMeg	NormalvsGATA1s	3172
LOPEZ_MBD_TARGETS	6.30303	1e-50	1.73279069767442e-48	925	APLP2,ACTN1,VCL,CAPN1,ALDOA,PTTG1IP,CD63,MAX,ARPC3,GSTP1,PFN1,S100A10,NCOA4,RHOC,PPP1CA,LYZ,SERPING1,FES,HLA-B,RPN1,FAM234A,RPL36AL,CAPZB,ANXA1,ARL6IP4,RHOA,PKM,C15orf39,ATP6V0C,CTDSPL,PDCD10,RNPEPL1,ANXA11,NR4A1,AGPAT3,MICALL2,RAB5C,CTSC,RHOB,CDK2AP2,RAB8A,CDC37,TMEM50A,ITM2B,TPM3,POLD4,DAZAP2,UBAC1,CTSH,SOD1,HNRNPF,NCAM1,PPIF,ATP6V0D1,SERPINH1,FAM89B,RAB10,ARPC4,TCIRG1,ELF4,USP20,SELPLG,ECH1,SO…	6.EryMeg	NormalvsGATA1s	3171
REACTOME_NEUTROPHIL_DEGRANULATION	6.30111	3.74463861823105e-34	2.02481836008986e-32	465	FTH1,EEF2,APRT,IMPDH2,PFKL,SERPINB1,CCT8,GMFG,GSTP1,EEF1A1,PKM,ITGB2,DDOST,CYB5R3,LAMTOR1,ATP8B4,HLA-B,TRAPPC1,CTSC,MAN2B1,FABP5,S100A11,PECAM1,DYNLT1,GSDMD,VAT1,SELL,PLAC8,CAPN1,CNN2,PTPN6,HSPA8,CSTB,CYBA,ILF2,APEH,CTSD,ACAA1,FTL,IQGAP2,RHOG,A1BG,NME2,JUP,VAMP8,VCP,ARHGAP9,PRDX6,CD33,B2M,LAMP1,HEBP2,KCNAB2,CTSZ,CTSA,CMTM6,PYGL,CAT,ATP6V0C,CAP1,DDX3X,RAB5C,ARPC5,RAB37,LAIR1,CD59,HLA-C,PSMD3,DEGS1…	6.EryMeg	NormalvsTrisomy21	3018
MARSON_BOUND_BY_E2F4_UNSTIMULATED	6.29854	1.3480600414016e-43	1.14278726236999e-41	664	ARMC8,IQGAP1,GPD2,STAT1,NET1,RAD51B,HSP90B1,POLR2A,DNAJB11,MSN,CDK19,PIAS1,BLZF1,AHCTF1,CCM2,UBAP2,MSH3,OPA1,EZH2,MRPS12,SIAH1,HNRNPA2B1,BTBD10,RIOK3,PRIM2,C1orf174,RPRD1B,TXLNA,PLAA,DHRS7B,YME1L1,C6orf89,EHD4,MTAP,DNMT1,SRSF11,ZNF438,SETD5,CMSS1,C2CD5,RTTN,FIP1L1,NUP153,RASSF3,LRRC40,APLF,POLA1,GTPBP1,GOLT1B,XRCC4,SMC4,RECQL,FANCL,SMC6,MCPH1,ABCB6,GTF2A1,NFATC2IP,SENP1,KCTD9,GSTCD,IFT80,SLC9A1,B…	7.EMPP	Trisomy21vsGATA1s	3220
GENTILE_UV_HIGH_DOSE_DN	6.29564	8.0588445130636e-35	4.77134762440115e-33	282	MEIS2,AUTS2,LRBA,STAM,BACH1,ZMYND8,PDCD10,SMAD3,DYRK1A,IGF2BP3,NCOA3,DDX17,QKI,RUNX1,TIPARP,MORC3,CNOT2,PTPN1,RIPK1,E2F3,FOXJ3,PUM1,UVRAG,SECISBP2L,PRKCD,SS18,PUM2,TLK2,ATP2A2,ITGA6,EDRF1,EFCAB14,PIKFYVE,PPP2R5C,ZNF217,RAB1A,SNX4,SIAH1,CDR2,ATP13A3,SIAH2,NFE2L2,ELF4,SSH1,STXBP3,RNF4,MTMR3,SPEN,TUBGCP3,STX7,STRN3,SLC20A2,HERPUD1,DICER1,SEC24B,RBMS1,PAFAH1B1,KIF2A,NCK1,NUP153,ZMIZ1,RAB14,NFIL3,UGCG…	7.EMPP	Trisomy21vsGATA1s	3219
LOPEZ_MBD_TARGETS	6.29463	1e-50	1.165e-48	925	PTTG1IP,GSTP1,CD63,APLP2,NCOA4,HLA-B,C15orf39,CAPN1,ACTN1,LYZ,AGPAT3,MAX,NR4A1,VCL,SERPING1,ANXA1,NFKBIA,NEAT1,HSPG2,RHOB,STAT5A,GADD45B,S100A10,ARL6IP4,SON,ATP6V0C,ARPC3,JUNB,CDC37,FES,RPN1,RHOC,USP20,ALDOA,PPP1CA,CTSH,RAB5C,ANXA11,TSC22D1,ELF4,TPM3,ITM2B,ADIPOR2,YES1,SERPINE1,MEG3,CDKN1C,ALDH3B1,DDX3X,PFN1,BNIP3L,CCS,FAM234A,PKM,RAB8A,CAPZB,FBXO34,ARHGDIA,PPIB,TFG,ZBTB46,HSPA8,HCLS1,HDAC5,MAP4K…	5.EryP	NormalvsGATA1s	3616
REACTOME_CLASS_I_MHC_MEDIATED_ANTIGEN_PROCESSING_PRESENTATION	6.29171	1.54279704930743e-35	9.43382458019131e-34	377	HERC2,PRKN,CD36,ZBTB16,RNF182,UBR4,TRIP12,HSPA5,PDIA3,PJA2,UBR1,ITCH,LNPEP,AREL1,TPP2,FBXW7,HERC1,SMURF1,UBA6,CYBA,PSMD1,UBE2E1,FBXL20,RNF19A,PSME4,NPEPPS,KLHL2,HECTD1,WWP1,HUWE1,CUL3,CBLB,FBXO11,BTK,LTN1,UBE2K,SEC31A,ATG7,UBE2Q1,ATG14,ZNRF2,BTBD1,SIAH1,HERC4,SIAH2,NCF4,RNF4,NEDD4L,UBE2Q2,FBXL4,UBE2H,PIK3C3,CUL2,RLIM,UBAC1,CUL5,SEC24B,PSMD14,RNF115,UBE3C,UBE2W,MKRN1,PSMD12,FBXW11,HERC3,SEC24D,ANA…	7.EMPP	Trisomy21vsGATA1s	3218
WONG_MITOCHONDRIA_GENE_MODULE	6.29035	9.46754900253634e-32	4.34466061906984e-30	216	ATP5PO,TUFM,ATP5F1B,ATP5PF,ATP5MC2,SLC40A1,MRPL3,NME4,TOMM40,GPX4,MRPL12,MRPS18B,COX5A,MRPL27,NDUFB2,NDUFB8,BOP1,NDUFS2,NIPSNAP1,CYC1,TIMM13,ATP6V1G1,HAX1,PRDX5,MTHFD2,NDUFS3,PCCB,NDUFV1,NDUFA8,DECR1,FIBP,TSPO,CRYZL1,HINT2,TIMM10,NDUFAB1,TFAM,ECHS1,TSFM,NDUFB5,ECI1,IDH2,MRPL11,PDHB,ATP5PB,ATP5MF,PDHA1,ATP6AP1,GCAT,NT5M,PPIF,NDUFC1,GSTO1,GOT2,UQCR10,DUT,ATP5MG,NDUFA7,TIMM8B,SLC25A39,CLPP,FH,DAP3,M…	5.EryP	NormalvsTrisomy21	2856
CHEN_HOXA5_TARGETS_9HR_UP	6.28997	5.40199931803116e-33	2.89920251169155e-31	217	PPP1R12A,BACH1,ATAD2B,NCOA3,JMJD1C,SMCHD1,C21orf91,CAB39,KLF6,MARK3,TIPARP,TANK,MORC3,CENPC,CNOT2,TUT7,CRY1,FOSB,TDG,CCNT2,IFRD1,TLK2,CCNL1,EDRF1,ARIH1,CHD9,RLF,ZNF451,ODR4,TAF2,PTPN2,ZNF267,AKAP10,RBM39,CNOT4,PELI1,KDM3A,TBK1,SREK1,THUMPD2,DAAM1,STRN3,DMTF1,PSPC1,WAC,GAD1,NEMF,YY1AP1,NFIL3,AVL9,DCLRE1C,ARID4B,CDK17,UIMC1,RBM5,GADD45B,PTBP2,ADNP,RELB,FEM1C,IRF7,CTH,PYROXD1,GABARAPL1,PIBF1,RIC8B,F…	7.EMPP	Trisomy21vsGATA1s	3217
DOUGLAS_BMI1_TARGETS_DN	6.28578	1.77827802883441e-39	1.10490341524912e-37	307	IL1RAP,MLC1,AGPAT3,SQSTM1,TMBIM1,LPP,STAT1,CLIC2,TPM3,IRF9,VEZT,CPEB4,CTSD,STAT6,SP100,SUN2,FAM234A,SHKBP1,MTMR14,PHKB,MFSD1,PIK3CB,PBXIP1,TDG,ICAM1,ATP6V0D1,TNFAIP3,NFKB2,OSBPL8,TPP1,BIRC2,M6PR,NFKBIZ,FZD6,VPS36,HMOX2,MYEF2,ARAP1,LIPH,MVP,SNRK,BIRC3,TM7SF3,DBNL,SLC7A11,KATNAL1,ZDHHC12,CSNK1D,PCYT1A,RNF168,TMEM127,SLC20A2,DIDO1,ATP6V1A,TMEM179B,SLC9A8,STX4,RMND5B,BCL2L13,CASP8,TAF10,SMIM14,NKIRAS…	5.EryP	NormalvsGATA1s	3615
WANG_RESPONSE_TO_GSK3_INHIBITOR_SB216763_UP	6.2848	3.76963619088005e-35	2.26786177290042e-33	348	PLXDC2,CD36,KMT2C,CD84,ASAH1,FYB1,PRKAR2B,PTPRC,PRKCB,MALAT1,PSTPIP2,ZFAND3,CD4,AGTPBP1,TET2,CPEB4,PROS1,RSRP1,ITCH,FOXN2,AHCYL2,ARHGAP15,ATP6V1A,FRRS1,PLD1,ZMAT3,CTNND1,HPS1,TMEM131,CHD2,CD68,ARNT,PHF21A,SENP7,CTSH,WASHC2C,TTC17,R3HDM2,VWA8,GPHN,PSAP,NCF4,CLN8,ZFYVE16,ZNF641,STAT2,AFG1L,TRA2A,RPRD2,ANXA5,PITPNC1,TRAK2,STAC3,SYCP2L,SLC7A11,SLX4IP,AGL,WASHC2A,GRAMD2B,KLHDC1,ST3GAL2,ACER3,TRIM38,AR…	7.EMPP	Trisomy21vsGATA1s	3216
REACTOME_CYTOKINE_SIGNALING_IN_IMMUNE_SYSTEM	6.27753	1.04094975132377e-45	7.68756851002374e-44	744	TGFB1,TIMP1,IL1RAP,IL2RG,FLNA,TNFSF9,CD4,MSN,B2M,STXBP2,LAMA5,YES1,HLA-A,LYN,SMAD3,SQSTM1,HLA-B,HSP90B1,DNAJC3,JAK1,STAT1,YWHAZ,HLA-C,TAB2,CDC42,PTPN6,RELB,ITGB1,PIK3CA,TUBA1C,NFKBIA,HIF1A,MAP3K8,ARIH1,UBC,SP100,IRF9,STAT5A,EIF4G2,MEF2C,PIK3CB,FOS,MCL1,STAT5B,PIAS1,CD70,NFKB1,TEC,SYK,TRAF6,TALDO1,CREB1,ADAR,MAP2K4,PTPN12,KRAS,RANBP2,BRWD1,ANXA1,CAPZA1,MAPKAPK2,PTPN1,SOS2,USP14,MEF2A,INPP5D,UBE2E1…	5.EryP	Trisomy21vsGATA1s	3667
KIM_BIPOLAR_DISORDER_OLIGODENDROCYTE_DENSITY_CORR_UP	6.2745	6.0891611380445e-46	7.95970870869641e-44	663	ITM2A,APLP2,OAZ1,RNH1,HMGN1,ALDOA,RPS10,ARPC3,CCND3,PFN1,KIFAP3,LGALS1,CAPNS1,GNAS,IGFBP7,ARPC2,TALDO1,NUCB1,PSAP,RPN1,ADRM1,STK24,SNTA1,RPL36AL,TMBIM6,CAP1,RHOA,PKM,ARF3,ATP6V0C,ATP5PO,DAD1,VPS28,PRKAR1A,PMVK,SERPINI1,DAZAP2,SOD1,GRN,ADD1,ATP6V0D1,MPP1,GPX4,MYL12B,SUMO3,GABBR1,ECH1,CIRBP,TAF10,CFL1,PDIA3,SEC11A,PIP5K1C,OS9,SUB1,DRAP1,UQCRC1,HNRNPK,TUBB4B,PNPLA6,TPI1,ARL4A,SF3B4,PSMD8,ATP5MF,PRPF…	6.EryMeg	NormalvsGATA1s	3170
WAKABAYASHI_ADIPOGENESIS_PPARG_BOUND_8D	6.26769	2.50665336177757e-40	1.92831416346229e-38	630	MEIS2,LIMS1,CD164,PRKAR2B,RABGAP1L,SGMS1,ARHGAP18,GNAQ,ROCK2,GNAS,GRTP1,TMBIM6,CALM1,DCBLD2,FNBP1L,CORO1B,CITED2,ARPC5,ARHGDIB,DNAJB6,CCM2,PRKAR1A,ABHD2,CYB5R3,ATP6V1A,USP15,TSPAN14,VCP,OSBPL3,KLF10,PGAM1,FBH1,YWHAH,ARHGAP1,APOBR,ERP44,MPDU1,ANGPT1,MRPS6,SLC5A3,HSD17B4,INSR,NUMB,NCOR1,NDUFB2,DECR1,LZIC,ACTN4,DUSP22,ARHGEF7,GRB2,BABAM2,MRPL41,TOP1,PRUNE1,TSPO,DYRK1A,MOV10,PRELID2,RB1,FAF1,WDR41,TG…	6.EryMeg	Trisomy21vsGATA1s	3086
DUTERTRE_ESTRADIOL_RESPONSE_24HR_DN	6.26491	1.15044341075841e-39	6.81044238162462e-38	496	KYNU,PDLIM5,PDLIM1,KLF6,DBN1,TP53INP1,CD55,ZFP36L1,MBOAT2,LDLRAD4,TFPI,SMAD3,SQSTM1,YPEL5,PNPLA8,EPB41,TAOK3,WWC2,PTGER4,TAX1BP1,CSRNP1,RHOC,RPS6KC1,CD46,MYH9,UBE2H,ATP2B1,RNF19A,MAP3K8,CTSH,CPEB2,CPEB4,TGFBR2,ARL15,FCHO2,PNRC1,ARHGAP12,LMBRD1,QKI,ARID4B,MCL1,CAB39,RAPGEF2,BAZ2B,S100A10,ITSN2,FNBP1L,ZNF217,KDM6B,KDM6A,RIPOR3,TRA2A,PTPN12,MYL12A,MTCL1,SOS2,HIVEP2,AKIRIN2,MYADM,CREB3L2,CITED2,ROCK2…	5.EryP	Trisomy21vsGATA1s	3666
GRAESSMANN_APOPTOSIS_BY_DOXORUBICIN_UP	6.26214	1e-50	8.77529411764706e-49	1112	PDLIM5,PDLIM1,ITGA2B,TP53INP1,EMP3,NCOA4,PDE4DIP,COL18A1,SPNS1,RABGEF1,YPEL5,FOSB,ARPP21,AGTPBP1,CAPN1,STAT1,PTGER4,USP20,TGOLN2,AHNAK,MIDN,PDLIM7,C21orf91,F11R,PDCD10,SP100,CPEB4,STK17B,FOS,EXOC4,SH3BGRL3,MCL1,ZMAT3,TMBIM1,POLR2A,CD68,SUSD6,TRA2A,CKAP2,PSTPIP2,MAN2B1,ZNF385A,TUT7,PPP6R3,ADAM8,ZFP36,ATP6V0C,TIPARP,NAPA,PPP1R15A,FOSL1,TPP1,MAPKAPK2,ATF3,PTPN1,SLC66A2,DNM2,GGNBP2,HIGD1A,SIAH1,NCOA1…	5.EryP	Trisomy21vsGATA1s	3665
REACTOME_PLATELET_ACTIVATION_SIGNALING_AND_AGGREGATION	6.25707	5.9250271343929e-34	3.48130334463306e-32	260	GP9,GP1BB,LAT,TGFB1,TIMP1,ITGA2B,APLP2,CTSW,VCL,TMSB4X,ACTN1,FLNA,TLN1,STXBP2,CD36,TRPC6,ALDOA,TAGLN2,PFN1,ABCC4,CD63,CD9,FCER1G,YWHAZ,GNAQ,WDR1,SERPING1,PRKCB,PTPN6,PROS1,HSPA5,MPL,PSAP,CALM1,GNAI2,RHOA,ANXA5,MPIG6B,LCP2,CLEC1B,GP1BA,FYN,PIK3CB,ITGB3,MMRN1,PRKCQ,CAP1,PRKCD,MAGED2,RHOB,CSK,LYN,PLCG2,FERMT3,PECAM1,CDC42,GNG5,THBS1,P2RY1,GNG2,RAC1,TBXA2R,SYK,SERPINE1,APBB1IP,GNG11,ACTN4,P2RY12,VTI1…	6.EryMeg	Trisomy21vsGATA1s	3085
GRAESSMANN_RESPONSE_TO_MC_AND_DOXORUBICIN_DN	6.25362	2.53928631430025e-41	1.99454257655878e-39	758	PLP2,ACTB,YWHAZ,DBN1,MSN,KLF6,TXNIP,HPS1,PRMT2,CCL5,GRTP1,TPM3,ARPC1B,VASP,FOXN2,PTBP3,FER,FXN,TOM1L1,SLC39A3,YES1,VTI1A,PBX2,C1D,ERC1,NUMB,AP1G1,C11orf98,GSR,VTI1B,SHKBP1,RIPK1,STAT5A,STAT5B,SLC39A11,DPH6,ADAT2,CHD4,RGS19,TRAF6,ARL6IP5,OCEL1,TMLHE,STAM2,TAOK1,RHBDD1,NORAD,COX17,ZFAND3,KRI1,LMBR1,USP4,EIF4E2,OPHN1,XPR1,BNIP3L,RABIF,FAR1,IBTK,NFYC,ZDHHC5,MAP2,TPK1,DTNBP1,SRSF6,D2HGDH,FBXW2,OGT,RCC…	6.EryMeg	Trisomy21vsGATA1s	3084
NAKAMURA_TUMOR_ZONE_PERIPHERAL_VS_CENTRAL_DN	6.25288	7.22422540466602e-44	5.61081506429061e-42	615	TIMP1,TESC,TXNIP,NR4A2,HLA-B,RHOBTB3,SLC2A3,ANKRD9,BACH1,HERPUD1,ETS2,HSPA5,FOS,NEAT1,GABPB1-AS1,SH3BGRL3,CITED2,DUSP1,JUNB,CFH,FTX,OBSL1,MALAT1,CTSH,ZMIZ1,TFPI,ITM2B,NFIL3,GNA15,MACF1,STAT6,PRKAR1A,MIDN,BNIP3L,ZG16B,WASF2,P4HB,SLC22A23,FAM234A,YPEL5,PKM,KLF11,SOD2,ZMYND8,DNAJB1,TLE5,PHKB,RAC2,ARHGEF7,MFSD1,RGL2,SYTL1,SYNE2,TTC3,MKRN1,PDK1,FUCA1,KLF13,CREB3L2,GLUL,PGK1,KDM5B,SLC25A36,MOB3A,CCNY,C…	5.EryP	NormalvsGATA1s	3614
NUYTTEN_EZH2_TARGETS_UP	6.24498	1e-50	1.165e-48	999	MEIS2,APLP2,TXNIP,HLA-B,ZFP36L1,C15orf39,B2M,AGPAT3,BACH1,DNAJB6,HERPUD1,ETS2,HSPA5,MAX,ANXA1,NFKBIA,S100A4,SQSTM1,KLF6,CD83,WWC2,JPT1,STAT1,JUNB,HLA-C,RHOC,ARF3,FYB1,ANK1,ADIPOR2,ADAM8,SERPINE1,CNRIP1,HSP90B1,VEZT,MYADM,MIR22HG,RPS6KC1,ARMC8,ARHGAP21,SP100,GLG1,PRNP,SGMS1,SOD2,EIF5,AP1S2,CSF1,ATP6AP1,TFG,ZFP36L2,JUN,MORC3,BLZF1,SLC16A3,TGFBR2,MFSD1,PIK3CB,MAP2K1,ANXA2,WDR1,CTSC,ICAM1,SERTAD1,TNF…	5.EryP	NormalvsGATA1s	3613
LIU_SOX4_TARGETS_DN	6.24073	4.59329292744987e-36	2.2689650295264e-34	306	PDLIM5,APLP2,TFPI,INF2,MRPS12,CCND3,WDR26,ATP9B,HECTD4,IRF9,HPS1,ITSN2,CUL3,GSE1,ARPC3,KDM6A,RPN1,UBA6,CTDP1,PDK1,FLOT2,GRN,MAP4,ETV6,TPP1,PFKL,DLG1,TBC1D5,OPA1,TNRC6B,ATF6,SELENOT,USP34,ABHD17A,RAB14,PAFAH1B1,TUBA1A,PUM1,ATP6AP1,HIPK3,MTMR3,ZDHHC21,TBC1D9B,AKR7A2,MKNK2,WSB1,SLC35F5,EP400,TWF1,CHFR,AKAP17A,UBE2J1,ARMH3,CBFA2T2,MECP2,PI4KA,FZR1,FAF1,RC3H2,MAPK14,EIF3C,TRAK1,BTG3,PLEKHF2,ANKLE2,PRP…	5.EryP	Trisomy21vsGATA1s	3664
REACTOME_SRP_DEPENDENT_COTRANSLATIONAL_PROTEIN_TARGETING_TO_MEMBRANE	6.23976	3.51732900408667e-32	1.64039431428092e-30	113	RPS4X,RPS26,RPL7A,RPL12,RPS3,RPS14,RPL18A,RPL10,RPLP0,RPL19,RPL6,RPL28,RPL29,RPL8,RPS5,RPS2,RPL18,RPS12,RPL11,RPS15,RPL22L1,RPL41,RPS28,DDOST,RPS7,RPL3,RPL13,RPSA,RPL32,RPL30,RPL5,RPLP1,RPS8,RPL36AL,RPL35A,RPL36,RPN2,RPS13,RPS24,RPS3A,RPS27A,FAU,RPL10A,RPL24,SEC61B,RPS15A,SSR2,RPN1,RPS21,RPS19,SRP68,SSR4,RPS9,SSR3,RPL26,RPS23,RPL22,RPL34,RPL15	5.EryP	NormalvsTrisomy21	2855
REACTOME_TRANSCRIPTIONAL_REGULATION_BY_TP53	6.23645	8.49747308047206e-35	5.24034248979195e-33	359	MT-CO1,LAMTOR1,YWHAZ,CDKN2A,ZNF385A,TP53BP2,TMEM219,TP53INP1,UBC,FOS,MT-CO2,YWHAB,YWHAH,CASP6,POLR2L,BAX,ARID3A,TAF10,SESN1,GSR,BBC3,SMYD2,RGCC,POLR2J,CHD4,TFDP2,APAF1,COX5B,TP53RK,AKT2,YWHAE,MOV10,PRDX5,CHD3,CCNK,ING5,LAMTOR2,PIP4K2A,G6PD,GLS,RNF34,BNIP3L,TAF12,PPP2CB,POLR2A,EP300,HIPK1,TXNRD1,STK11,RBL2,PPP2R5C,CENPJ,MTA2,GTF2H5,CTDP1,USP7,SUPT5H,CDK13,PRKAA1,MNAT1,SLC38A9,CRADD,TAF13,GATAD2A,G…	6.EryMeg	Trisomy21vsGATA1s	3083
GENTILE_UV_HIGH_DOSE_DN	6.23629	7.65407748507373e-35	3.61340278235221e-33	282	MEIS2,STAM,AUTS2,LRBA,BACH1,SMAD3,KLF10,RHOB,HERPUD1,NCOA3,ELF4,DYRK1A,DDX17,PDCD10,ZMIZ1,QKI,MCL1,RAB1A,RAPGEF2,UVRAG,NFIL3,ZNF217,SERTAD2,MORC3,ZFP36,SECISBP2L,TIPARP,E2F3,CHD1,ZMYND8,MAPK6,CNOT2,IGF2BP3,ATF3,PTPN1,SIAH1,FOXJ3,DUSP1,SEC24B,STXBP3,RNF4,RIPK1,SPEN,SMURF2,PRKCD,TLK2,ATP2A2,PUM2,DDX3X,STX7,RAB14,BNIP2,NCK1,NUP153,SIAH2,PAFAH1B1,STRN3,TNFAIP3,PUM1,RYBP,ATP13A3,MTMR3,EFCAB14,RBMS1,RU…	5.EryP	Trisomy21vsGATA1s	3663
REACTOME_NEUTROPHIL_DEGRANULATION	6.23627	2.83831137566572e-36	1.89102495403729e-34	465	LRRC7,ASAH1,SLC2A3,CST3,VCL,TYROBP,S100A11,CD36,FCGR2A,ALDOA,B2M,CD63,ARMC8,BIN2,FCER1G,LAMTOR1,IQGAP1,LYZ,CYBA,CAPN1,CTSA,ACTR2,CD55,PTPN6,GSN,TRAPPC1,PTPRC,RAB10,PSAP,CD68,TMBIM1,NBEAL2,RHOA,CTSH,GSTP1,CTSZ,ARPC5,CAP1,PRKCD,STOM,PSMD6,DNAJC3,FUCA1,CYB5R3,RNASET2,CFP,OSTF1,HLA-C,YPEL5,TSPAN14,ATP6V0C,DOK3,PECAM1,VCP,RAB5C,STK10,PFKL,FUCA2,PGAM1,RAC1,RAB14,ERP44,CMTM6,HLA-B,SNAP23,PLD1,GRN,TCIRG1…	6.EryMeg	Trisomy21vsGATA1s	3082
REACTOME_M_PHASE	6.22824	7.24562250334753e-34	4.00387732407204e-32	352	PRKAR2B,PRKCB,CLASP2,RAB2A,LMNA,TUBA1C,PPP2R5A,NIPBL,CENPC,PSMD1,NDEL1,STAG1,UBE2E1,PSME4,MAPK1,TAOK1,EML4,CLASP1,BLZF1,TUBB1,CKAP5,RANBP2,CEP192,CEP70,AHCTF1,PCM1,PPP2CB,PPP2R5C,RAB1A,SPAST,CHMP4B,PPP2R2A,TUBGCP3,NUP93,YWHAG,PDS5B,NUP214,AKAP9,HDAC8,PSMD14,STAG2,PAFAH1B1,CSNK2A1,PDS5A,KIF2A,PSMD12,CNTRL,LPIN2,DYNC1I2,ANAPC10,NUP153,NEDD1,IST1,TUBB2A,CLIP1,SMC4,CDC16,TNPO1,DCTN1,PPP2R2D,YWHAE,NEK…	7.EMPP	Trisomy21vsGATA1s	3215
REACTOME_RESPONSE_OF_EIF2AK4_GCN2_TO_AMINO_ACID_DEFICIENCY	6.21802	1.1895717460981e-29	5.04351384624093e-28	102	RPS4X,RPS26,RPL7A,RPL12,RPS3,RPS14,RPL18A,RPL10,RPLP0,RPL19,RPL6,RPL28,RPL29,RPL8,RPS5,RPS2,RPL18,RPS12,RPL11,RPS15,RPL22L1,RPL41,RPS28,RPS7,RPL3,RPL13,RPSA,RPL32,RPL30,RPL5,RPLP1,RPS8,RPL36AL,RPL35A,RPL36,RPS13,RPS24,RPS3A,RPS27A,FAU,RPL10A,RPL24,RPS15A,RPS21,RPS19,IMPACT,RPS9,RPL26,ATF4,RPS23,RPL22,RPL34,EIF2S2,RPL15	5.EryP	NormalvsTrisomy21	2854
WANG_RESPONSE_TO_GSK3_INHIBITOR_SB216763_UP	6.216	5.65507846822313e-34	3.34906313729214e-32	348	ASAH1,CD36,FYB1,B2M,CD4,PLXDC2,CD84,PRKAR2B,MALAT1,HPS1,PRKCB,PROS1,PTPRC,NCF4,PSAP,CD68,ANXA5,CTSH,FOXN2,ZMAT3,RSRP1,KMT2C,WASHC2C,SNRPN,PSTPIP2,ATP6V1A,CPEB4,ARNT,ZNF641,HACD4,C18orf32,STAC3,AGTPBP1,R3HDM2,AHCYL2,CTNND1,PLD1,TET2,FRRS1,AP1G2,SLC35D2,ORMDL1,CLN8,TRAK2,F11R,LAMP1,GRAMD2B,ZFYVE16,ITCH,PLD3,WASHC2A,RCAN3,STAT2,ZFAND3,ATF7IP2,TRAF3IP3,SENP7,PTPN22,TAF12,ZYG11B,SLX4IP,AGL,PITPNC1,TRA…	6.EryMeg	Trisomy21vsGATA1s	3081
REACTOME_NONSENSE_MEDIATED_DECAY_NMD	6.21591	3.31264154380295e-31	1.48017552094956e-29	116	RPS4X,RPS26,RPL7A,RPL12,RPS3,RPS14,RPL18A,RPL10,RPLP0,RPL19,RPL6,RPL28,RPL29,RPL8,RPS5,RPS2,RPL18,RPS12,RBM8A,RPL11,RPS15,PABPC1,RPL22L1,RPL41,RPS28,RPS7,RPL3,RPL13,RPSA,PPP2R1A,RPL32,RPL30,RPL5,RPLP1,RPS8,RPL36AL,RPL35A,RPL36,RNPS1,RPS13,RPS24,RPS3A,RPS27A,FAU,RPL10A,RPL24,RPS15A,EIF4A3,RPS21,EIF4G1,RPS19,RPS9,RPL26,RPS23,NCBP2,RPL22,RPL34,RPL15	5.EryP	NormalvsTrisomy21	2853
SPIELMAN_LYMPHOBLAST_EUROPEAN_VS_ASIAN_DN	6.21244	5.94636534891265e-43	6.15366225204836e-41	584	PDLIM5,ASAH1,MEF2C,SNX3,CD63,ATP6V0E1,KIFAP3,CD164,ILK,PIP5K1B,SLC16A3,PSAP,ACTR2,DOK2,ARPC5,TMBIM6,CAP1,ATP5PO,PDCD10,ANXA11,GLG1,RHOB,RAC2,ITM2B,SYK,NAPA,DAZAP2,JAK1,SQSTM1,NFIL3,SUMO3,KLF10,SON,PDK3,LGMN,HSPA8,M6PR,DDOST,HSD17B12,XPNPEP1,ICAM2,VPS26C,PTPRC,YWHAZ,CTBS,SCP2,ABT1,RPN2,WASF2,SKAP2,ARAF,PDIA5,STAT3,ADH5,ASH2L,PTBP3,ATG5,USP16,RABIF,PTPN12,MCM3AP,RALB,CMPK1,ATXN10,KLHDC2,BIRC2,PDE3B…	6.EryMeg	NormalvsGATA1s	3169
CAIRO_HEPATOBLASTOMA_CLASSES_UP	6.21168	3.21094089774682e-35	1.81515461962021e-33	598	RPLP0,RPS3,APRT,EIF4A1,IMPDH2,MYCN,RPL19,RPL28,LAPTM4B,AHCY,RPS14,RPL18A,RPL6,RACK1,DDOST,ENO1,RPL8,APEX1,OXA1L,CLIC1,KDELR1,PHB2,MAZ,ERGIC3,PUF60,RPL18,ATP5MC2,SLC25A3,EIF3F,EEF1D,TPI1,RPL11,RPN2,ADSL,TRIM28,NPM1,SRSF9,CPSF1,JPT1,CCT7,PLTP,SF3A1,RUVBL2,LSM2,SUPT4H1,RAN,EIF3L,ILF2,SMARCB1,RSL1D1,PSMB5,GART,GPX7,P4HB,FARSA,CLNS1A,STOML2,NME2,PSMF1,TAF1D,PRDX6,AP1G2,PTDSS1,MRPS7,RTRAF,BFAR,PLIN3,HS…	6.EryMeg	NormalvsTrisomy21	3017
REACTOME_INFECTIOUS_DISEASE	6.21014	1e-50	1.165e-48	993	TGFB1,CYBA,TUBA1C,TXNIP,HLA-B,GNAI2,GPC4,B2M,PTPN6,CD4,ACTR2,NFKBIA,ARPC1B,HSPG2,HLA-A,GNAS,VCP,STAT1,ARPC2,ARPC3,CD9,CALR,FCGR2A,HLA-C,STAM,RPN1,JAK1,PPP1CA,RAB5C,DNAJC3,YES1,SERPINE1,TUBB4B,SMAD3,NCKAP1L,FURIN,REST,PRKAR1A,RPS10,POLR2A,PAK2,GNB3,WASF2,MYH9,AP1S2,PPIB,LYN,JUN,HMG20B,HSPA8,IRF7,JAK3,DDOST,SYK,IFNAR1,MAP2K1,ARPC5,YWHAH,CTNNB1,AP2M1,BCAP31,CTDP1,RIPK1,NFKB2,UBC,MED21,NFKB1,CHD3,ROC…	5.EryP	NormalvsGATA1s	3612
REACTOME_INNATE_IMMUNE_SYSTEM	6.2081	5.2458446813479e-46	7.24800873472901e-44	1031	LRRC7,DNM3,LAT,SLC2A3,VCL,ARMC8,CD36,FCER1A,MEF2C,ASAH1,CD55,CFH,TYROBP,S100A11,CTSA,LYN,FCGR2A,YES1,CTNNB1,RAB10,PIK3CB,TXNIP,CD4,DNAJC3,ACTR3,MAP3K8,CST3,LCP2,PFKL,PROS1,PRKCQ,IQGAP1,CYBA,PTPRC,NCF4,TSPAN14,CD46,ATP6V0E1,MAP2K4,UBR4,DNM2,ACTR2,PLD1,NBEAL2,VCP,ATG5,PSEN1,TANK,BIN2,MYH9,SYK,PSAP,RIPK1,CMTM6,LYZ,CAPN1,BTK,PPP2CB,CTSZ,CTSC,B4GALT1,DDX3X,SERPING1,TAX1BP1,CD68,PECAM1,GSN,TUBB4B,MAP2K…	7.EMPP	NormalvsGATA1s	3095
ACOSTA_PROLIFERATION_INDEPENDENT_MYC_TARGETS_DN	6.20767	1.15693775860302e-32	5.25983410252691e-31	116	KYNU,CLEC11A,GYPB,S100A11,CD63,GATA1,SELENBP1,CAPN1,AKR1C1,SLC2A3,MPP1,CBFA2T3,STAT5A,KLF6,JUNB,RHOC,PIM1,ESYT1,ADAM8,YES1,ARL4A,CTSD,LCP2,GABRE,SLC10A3,LRP10,ADGRE5,AKR1C2,RAC2,SERPINH1,CMTM6,SEC14L1,DMTN,PTPRC,C11orf21,LYL1,MCL1,NFE2,SH3BP1,RAB5B,ST3GAL2,USP11,AIF1,POLD4,CHPF2,TRPV2,LASP1,LYPLA2,TOR4A,ARFGAP3,CAP1,TAX1BP3,CREM,HMBS,STAT3,MINK1,NEU1,SHANK2,SHC1,STIMATE,BCL2L1,CARD9,GTF2F1,ARHGEF…	5.EryP	NormalvsGATA1s	3611
RHEIN_ALL_GLUCOCORTICOID_THERAPY_DN	6.20521	2.02440280763259e-31	9.62171576468433e-30	361	GAPDH,RPLP0,EGR1,IMPDH2,IGFBP7,TKT,CCT8,BHLHE40,LAPTM4B,AKR1A1,AHCY,ENO1,CD34,APEX1,IGLL1,SHMT2,ATP5PF,LAT2,TUFM,PGD,PSMB8,RBM8A,TALDO1,FABP5,TPI1,UBE2L6,NUCB2,ADSL,NPM1,CITED2,PGK1,CCT7,EID1,HSPA8,RSL1D1,SDHC,ADA,GPX7,PIGP,CLNS1A,STOML2,TUBA1C,BCAP31,PRDX6,PARK7,FRMD4B,CD99,RPL3,MRPL3,LDHA,PDCD2,CFAP298,MARCKSL1,PRDX3,VDAC1,CCND3,MAGED1,SCCPDH,IDH2,CAT,FHL1,LDHB,SERBP1,PIN4,ETFA,MYO18A,NME1,ATP5…	6.EryMeg	NormalvsTrisomy21	3016
MULLIGHAN_MLL_SIGNATURE_1_UP	6.2026	1.61779644268152e-37	8.93502983454326e-36	378	CYBA,FLNA,C15orf39,CTSA,ACTR2,CCND3,MYO1F,ARPC1B,OAZ1,IGFBP7,S100A4,TRAPPC10,ARPC2,LAPTM5,FCGR2A,FES,LAMP1,SPI1,LGALS1,ATP6V0E1,ELF4,LAT2,GRN,DNM2,ABHD17A,EHBP1L1,GLG1,P4HB,RNF167,PKM,RAC2,HCLS1,SLC16A3,SYK,MFSD1,MALT1,B4GALT1,C11orf21,APOBR,ABHD2,OSBPL8,SIPA1,PRKCD,FUCA1,TPP1,MRTFA,CHD3,TGOLN2,PSEN1,MICAL1,PECAM1,M6PR,HSPA1A,AKR7A2,PTK2B,ARPC4,RASSF2,HDAC6,PLD3,SFMBT1,ARL6IP5,FAM53B,SELPLG,SLA,S…	5.EryP	NormalvsGATA1s	3610
TOYOTA_TARGETS_OF_MIR34B_AND_MIR34C	6.19798	1.8050189224361e-36	1.16081389322184e-34	439	MBOAT2,DIPK2A,ZMYND8,YWHAZ,VTI1A,FAM171A1,NCOR1,ABHD2,FAR1,SCAF4,TBC1D5,MCU,USP14,ZNF273,STAG1,TRIM33,NFATC3,DIDO1,SLC43A3,ATP2A2,KIF20B,DHX9,CPSF6,TNPO3,PARN,RIF1,CEP85,DIAPH1,METTL15,SREK1IP1,UPF2,BCAP29,TUBGCP3,RAPGEF6,STRBP,TRA2A,HDAC8,C6orf89,SETD2,LUC7L,UGGT2,MDM4,SLC7A11,LRRC8C,FIP1L1,VPS54,WWP2,PPFIA1,NEDD1,SMAD2,ARID1A,PPP6R2,GALNT11,ZBTB20,PDXDC1,DCLRE1C,STK38L,ZNF254,CRTC3,NOL10,NEDD4,…	7.EMPP	Trisomy21vsGATA1s	3214
RODRIGUES_THYROID_CARCINOMA_POORLY_DIFFERENTIATED_DN	6.19453	4.26607386222526e-42	4.75062344568099e-40	776	PDLIM5,ELL2,DHRS3,FTX,SLC40A1,PRMT2,GABPB1-AS1,TPST2,TXNIP,MAP3K5,CITED2,MED13L,CST3,GLUL,NEAT1,FBXO34,NET1,GALNT10,EPB41,NCOR1,DDX17,CPQ,CAPN1,STIM1,TGFBR2,CROT,TMEM164,ADD1,MBNL1,FKBP5,HECTD1,SUSD6,GSN,TBC1D4,SELENBP1,FGD4,F11R,TMBIM1,MYLIP,ELF2,AHCYL2,SRRM2,GADD45B,WDR11,ITPRID2,AKR1C1,GNAS,ACAD8,AKAP9,RNF38,ZNF518A,CDK13,MALAT1,INO80D,NSD1,EHD4,MLXIP,MED23,AFF4,ZBTB46,ITPR1,MRTFB,GOLGB1,PPP1R…	7.EMPP	NormalvsGATA1s	3094
NAKAMURA_TUMOR_ZONE_PERIPHERAL_VS_CENTRAL_DN	6.19205	3.56526007160749e-40	2.79966738254651e-38	615	SLC2A3,MACF1,BACH1,CFH,NR4A2,ZMYND8,MALAT1,RHOBTB3,TIMP1,PHKB,TESC,NEAT1,SLC22A23,FTX,HSPA5,ANKRD9,ARHGEF7,PDK1,TXNIP,AUH,GLUL,PNPLA8,GPCPD1,TFPI,EP300,PTEN,ABI1,DENND4C,FNDC3B,ZNF292,CITED2,CREB3L2,NUFIP2,TMEM245,CROT,WDR11,LXN,CCNT2,CTBP2,SEC31A,CTSH,KLF11,CCNL2,FNDC3A,ARID1B,ATG14,PCMTD1,BNIP3,BTBD1,GLYR1,ZNF451,CCNY,RALGAPA2,CHMP4B,SLC25A36,YPEL5,HNRNPA2B1,GABPB1-AS1,WIPF2,TMEM165,SLC5A3,LAMP…	7.EMPP	Trisomy21vsGATA1s	3213
WP_EGFEGFR_SIGNALING	6.18852	2.45046305782005e-33	1.06888911978244e-31	162	STAM,PRKCB,IQGAP1,FOSB,JAK1,STAT1,NCOA3,CDC42,PTEN,ITCH,STAT5A,ABI1,MEF2C,DOK2,BRAF,FOS,STAT5B,USP6NL,CREB1,PTPN12,KRAS,MAP3K2,RICTOR,SOS2,MEF2A,MT-CO2,INPP5D,AP2B1,MAP2K1,PIK3R1,MAPK8,PLD1,PRKCD,USP8,MEF2D,SYNJ1,PTK2B,NCK1,RALA,STAM2,MAPK1,FOXO1,CSK,JAK2,MAP3K1,RAP1A,STAT3,GRB2,PTPN11,ROCK1,RAC1,CBL,MAPK14,ABL1,GAB2,PLSCR1,MAP3K3,TNK2,CBLB,ELK1,JUN,INPPL1,CRKL,ARHGEF1,AP2M1,RAF1,HGS,ATXN2,RASA1,…	5.EryP	Trisomy21vsGATA1s	3662
DAZARD_RESPONSE_TO_UV_NHEK_DN	6.18772	3.30233057237394e-34	1.98725731702051e-32	297	RABGAP1L,MAP3K5,AUTS2,MAST4,BACH1,JARID2,ELF1,ZMYND8,FNBP1L,PPP1R12A,SMAD3,FYN,PRKCD,LPP,KIF2A,GSE1,STRN,MED13L,SKAP2,TIPARP,NCOA3,CDYL,ARID3A,QKI,IGF2BP3,KIAA0232,ARHGEF7,EFNB2,MORC3,AFF1,VPS13B,DYRK1A,ZNF217,MTM1,E2F3,BIRC2,NFE2L2,HIVEP2,CREB3L2,VPS13A,TMEM131L,DIDO1,SLC25A36,PHLPP1,MTCL1,ADORA2B,KLF7,CBLB,POLE2,GCLC,RCHY1,XPO1,ZFC3H1,KLHL9,CTCF,WDR37,ELF2,DMTF1,TMCC1,ATP13A3,SERTAD2,PPIP5K2,TU…	6.EryMeg	Trisomy21vsGATA1s	3080
JIANG_MELANOMA_TRM2_CD8	6.18637	3.69088654627198e-33	1.75281847700662e-31	144	ITM2A,FOSB,NR4A2,HLA-B,ZFP36L1,RASGEF1B,ZFP36,TNFSF9,SLC2A3,DNAJB6,NR4A1,FOS,ANXA1,NFKBIA,HLA-A,KLF6,GADD45B,MAP3K8,CITED2,DUSP1,RSRP1,HLA-C,PTGER4,CLIC1,MALAT1,TENT5C,MYADM,CSRNP1,PRNP,YPEL5,DNAJB1,JUN,DUSP2,HSPA8,NR4A3,PTPRC,CTSC,PIK3R1,CYTOR,SERTAD1,TNFAIP3,UBC,STK17B,NFKBID,BTG2,MCL1,PPP1R15A,NFKBIZ,HSPA1A,TUBA1A,GNG2,SELENOK,CEMIP2,SLA,RNF19A,RGS1,CCL5,BIRC3,SDCBP,RGCC,BRD2,DNAJA1,CREM,SRGN,…	5.EryP	NormalvsGATA1s	3609
LEE_DIFFERENTIATING_T_LYMPHOCYTE	6.18334	5.22506412814772e-33	2.43487988371684e-31	195	LAT,ITM2A,TXNIP,PRKCB,CCND3,GABPB1-AS1,LAPTM5,SEPTIN6,FYB1,CELF2,FKBP5,EPB41,NCKAP1L,ARHGDIB,TMEM131L,GMFG,AP1G2,APBB1IP,ZFP36L2,RAC2,HCLS1,RCSD1,PTPRC,PRKCQ,AKAP13,KLF13,ATF7IP2,TMBIM4,DOCK2,BTG2,SRRM2,LNPEP,UBE2G2,UBASH3A,TMC6,SELPLG,USF3,SEMA4D,SLA,CORO1A,AKNA,DCLRE1C,FLI1,TBC1D10C,EVI2B,AIF1,LPXN,GPR174,EVL,TRAF3IP3,RASSF5,ARHGAP30,SP110,SNX20,RGCC,ING3,BRD2,UCP2,ARHGAP45,CD53,BCL2L11,SRSF6,T…	5.EryP	NormalvsGATA1s	3608
YAGI_AML_FAB_MARKERS	6.18165	4.17456240242504e-33	1.96997071344817e-31	193	MYO16,RHAG,ITGA2B,GP9,DLC1,GP1BB,CTSW,IL2RG,ZBTB16,NR4A2,CD164,AHNAK,AKR1C1,MAX,VCL,TRPC6,LAMA5,S100A10,ELL2,CFP,LDLRAD4,CFH,PIM2,TPST2,SNTA1,ADAMTS3,LGALS1,ELOVL6,ORAI2,CD68,KEL,GABRE,NET1,ZMYND8,AP1S2,PIR,TFDP2,FAM20B,SERPINH1,NR4A3,GJA4,ANXA2,RUNX1T1,NCAM1,MED21,ANXA5,PDCD10,DRAP1,GP1BA,SERPINI1,CSF2RB,PROS1,GAD1,AOAH,ITGA6,TCIRG1,ACO1,ANKLE2,PCCB,AIF1,BAMBI,ITSN2,TBPL1,CLCN4,CDC42BPA,IL10RB,U…	5.EryP	NormalvsGATA1s	3607
ENK_UV_RESPONSE_KERATINOCYTE_DN	6.18076	3.63641399173509e-36	2.88630689280165e-34	473	SLC2A3,KIFAP3,DHRS3,GNAQ,ROCK2,MACF1,ZMYND8,YES1,TPST2,SEMA3C,MAP3K5,ACTR3,ACSL3,ARHGEF7,CLTC,SP100,CD46,CNOT2,NPTN,ACTR2,DDX17,TRIP12,CTCF,PTPN1,TGFBR2,MBNL1,NCOA3,FKBP5,DNAJA1,GBE1,MAP4,MALT1,MCM3AP,AGPS,COG5,ITSN1,AUH,MAN2A1,USP14,RBM6,FNTB,BIRC2,CTNNA1,CD58,SCFD1,AFF1,YME1L1,KRAS,STK3,ATP6V1A,BNIP3L,ATP1B3,SNX4,PICALM,DOP1B,IGF2BP3,WNK1,PRKAR1A,YAF2,ASH2L,CRADD,MKRN1,KLF7,CPOX,TBXA2R,IL10RB,V…	7.EMPP	NormalvsGATA1s	3093
ZHENG_FOXP3_TARGETS_IN_THYMUS_UP	6.17923	1.96635222901372e-31	1.28692578777819e-29	199	LDLRAD4,RABGAP1L,SGMS1,CD84,JARID2,MAP3K5,CITED2,PTBP3,C21orf91,CNOT2,ITGA6,ZFAND6,MBNL1,NCOA3,TOP1,TUBB4B,ZC3HAV1,TOX,MALT1,HEATR5A,IBTK,PIK3R1,ATP2B1,ZNF217,TBC1D5,EVI5,RAPGEF6,DUSP22,ATP6V1A,SDCBP,BTBD10,AKAP13,STAT5B,WNK1,ASXL2,CPOX,MAP3K1,ANKRD12,STAT4,CDK19,PPP2R5C,CDK17,HBS1L,CBLB,ELF1,ARL4A,TASP1,OTULIN,SESN1,EXOC6B,SLAMF6,HERPUD2,TBC1D15,ABT1,FAM3C,KLF6,SMC5,TOP2B,MAN1A2,B3GNT2,KAT6B,LNX…	7.EMPP	NormalvsGATA1s	3092
REACTOME_RHO_GTPASE_CYCLE	6.17831	5.17088500394633e-39	2.94424665988059e-37	447	DLC1,CYBA,DBN1,ARHGAP6,STAM,ACTN1,IQGAP1,TPM3,TAOK3,CDC42SE2,RHOB,FMNL1,RHOC,CDC42,ITGB1,ARHGEF7,PIK3CA,WASF2,NCF4,ARHGAP21,TMOD3,ABI1,GMIP,CLTC,ARHGAP12,NCKAP1L,VCP,FGD4,ITSN2,CUL3,FNBP1L,CAPZB,NET1,STK10,DOCK2,AKAP13,FLOT2,ESYT1,SCFD1,LAMTOR1,MACO1,PREX1,SOS2,CCDC88A,WASL,PLEKHG1,ARHGAP15,FARP1,ROCK2,FAM13B,JAG1,USP9X,DIAPH1,PIK3R1,RAB7A,ITSN1,SPEN,PAK2,PLD1,FRS2,STX5,KIDINS220,MYO9B,TFRC,ARHGA…	5.EryP	Trisomy21vsGATA1s	3661
WP_VEGFAVEGFR2_SIGNALING	6.17687	2.73870467001143e-35	1.77706210848916e-33	428	VCL,TMSB4X,TUBA1C,NR4A2,LRRFIP2,ALDOA,MEF2C,PFN1,IQGAP1,ITGB1,RHOC,MAP3K5,STAM,TXNIP,ROCK2,PPP1CA,SH3BGRL3,PRKCB,PTPN6,EIF4G2,TPM3,CAPZB,RHOA,CLTC,FYN,ITGB3,STAT1,CLIC1,PRKCD,RAB11A,TMOD3,CSK,EPB41,MYH9,CTNNA1,CDC42,C15orf39,ATP6V0D1,ARNT,MMP14,MKNK1,HDAC5,HERPUD1,SDF2L1,HBD,RAC1,NAPA,CTNND1,PAK2,NUMB,DECR1,QKI,PDE4DIP,SYNJ1,STAT6,BMP2,EIF4G1,SDCBP,CFL1,GRB2,ITCH,TMOD1,PRKD1,TAL1,ARF4,YWHAE,MOV10…	6.EryMeg	Trisomy21vsGATA1s	3079
LI_DCP2_BOUND_MRNA	6.17618	3.14311886522482e-28	1.21523072395376e-26	87	APRT,NOP53,ENO1,RPS5,EIF3G,RUVBL2,RPSA,APEH,EEF1D,UQCRC1,MRPL12,ZNF593,TTC3,MAP2K2,NDUFA13,BHLHE40,PSMC5,TST,MRPS12,PPIB,CYC1,FLII,UFC1,DEAF1,EDF1,NOP56,MTX1,WDR74,CUEDC2,NARF,EXOSC4,DUS1L,NOL7,MRTO4,FAHD2A,ADA,ELOB,PDXK,BID,PSMC3,HMOX2,NDUFS7,SCO2,AP2S1,POLR2L,NME6,NDUFB7,WDR45,NDUFS8,HSD17B10,PPP1R7,TRIB3,TACO1,UBXN6,ETFB	5.EryP	NormalvsTrisomy21	2852
JIANG_MELANOMA_TRM9_CD8	6.17575	4.81806072637594e-37	3.23808405574455e-35	522	LDLRAD4,PPP1R12A,MACF1,FYB1,LIMS1,ZFP36L1,ELF1,MT-ATP6,NR4A2,PTPRC,MBNL1,MT-CO1,IL2RG,TLN1,YWHAZ,IQGAP1,SPN,EIF4G2,ACTR3,NCOR1,PDIA3,CDC42SE2,ACTR2,LCP2,LNPEP,CTSW,KLF6,WDR1,BIN2,GNPTAB,MYH9,CD164,SDCBP,STK4,JAK1,MSN,MT-CO2,CAPZA1,GNG2,MT-ND3,S100A10,MAPK1,TAX1BP1,FYN,CBLB,SEMA4D,MT-ND5,RANBP2,CD63,G3BP2,PCM1,CELF2,RHOC,CCND3,ROCK1,STK17A,PPP2R5C,RPS4Y1,HCST,MT-ND4L,DOK2,CCL5,PRRC2C,CAPZB,ITM2A,Y…	7.EMPP	Trisomy21vsGATA1s	3212
WP_VEGFAVEGFR2_SIGNALING	6.17539	1.26623858959859e-34	7.32258905302751e-33	428	LRRFIP2,VCL,STAM,MEF2C,MAP3K5,NR4A2,PRKCB,ITGB1,ROCK2,CLTC,EPB41,CTNNB1,IQGAP1,EIF4G2,STAT1,NUMB,PIK3CA,TXNIP,ITCH,TMOD3,ATF2,TUBA1C,QKI,MAP2K4,MYH9,FAF1,CTNND1,SDCBP,PTPN1,RICTOR,MAPK1,ADAM10,ARNT,FYN,CTNNA1,PPP3CA,GRB2,EIF2AK3,FRS2,ACACA,PRKCD,GIGYF2,CREBBP,RHOC,MAP2K1,ITGB3,ROCK1,PDE4DIP,EPS15,MMP14,ANXA1,HDAC5,PRRC2C,CAPZB,SIAH2,PTPN11,GSK3B,SYNJ1,ASCC3,BSG,RBM39,EIF4G1,DNAJA1,ATF6,PAK2,GRB10…	7.EMPP	Trisomy21vsGATA1s	3211
GARY_CD5_TARGETS_DN	6.17233	7.34666411443982e-35	4.56840063516249e-33	430	MAX,MRPS12,SGMS1,ATP6V0E1,TXNIP,HSPA5,BMP2K,SNRPD3,SERF2,CITED2,SLC44A1,DNAJB6,USP15,DAAM1,UBE2F,SDF2L1,KLF10,DNAJB11,RUNX1T1,RBM4,STX7,PSMA7,EIF3J,BLZF1,UFD1,ATP6V1C1,ANP32A,ETS1,ADI1,HSP90B1,BZW1,CNDP2,IDE,LSM10,CRYZ,PPIB,WWP1,EIF4E2,CHCHD7,PFDN1,FMR1,PBRM1,KBTBD8,FAR1,MT1X,ZNF407,UBE2L3,PSMD1,DHX29,DLEU1,SOAT1,IFI35,STIP1,RALGPS2,HSPA1A,TDG,UFM1,SOD2,PDIA6,MAGT1,SLC30A5,UBE2K,POLE2,HSPA4,SGK3,…	6.EryMeg	Trisomy21vsGATA1s	3078
AMUNDSON_RESPONSE_TO_ARSENITE	6.17102	1.37238921622904e-33	6.02155950814848e-32	207	DLC1,DNAJB6,NEAT1,LYZ,LYN,ATP2C1,TAOK3,CTSA,SLC7A5,RPS6KC1,DYRK1A,RELB,UBE2H,BMP2K,ARIH1,CPEB4,ACAP2,KDM2A,PRNP,KDM6A,ETS2,STK10,CHD2,GRN,ZMYND8,ATP6V0A1,TPP1,ATF3,DAG1,SERPINH1,FXR1,TANK,CDC14A,GOLGB1,OGT,MAN1A2,HEXA,ATP6V0E1,SIAH2,BCL3,STK17A,TULP4,RNF115,DDIT3,STAT6,ATP6V0D1,MAFG,NEU1,SRPK2,TNKS,IL6ST,ADAM17,ZFAND5,JUNB,ADNP,PIK3R4,ZNF254,MED14,NFE2L1,KIFC3,CNTRL,TMF1,TIMM17A,GLA,UBE2B,DNAJB4,…	5.EryP	Trisomy21vsGATA1s	3660
JIANG_MELANOMA_TRM8_CD4	6.16809	1.08038494615633e-34	6.60805940017916e-33	423	LAT,PLP2,SLC2A3,S100A4,TMSB4X,EMP3,IL2RG,RPS10,ZFP36L1,S100A11,ITM2A,FYB1,NR4A2,MT-CO1,SPN,B2M,MYL12A,TAGLN2,S100A6,PFN1,MT-ATP6,CD4,HCST,YWHAZ,LY6E,CCND3,S100A10,KLF6,NDFIP1,TXNIP,MALAT1,PRMT2,SH3BGRL3,PTPRC,TPM3,CALM1,ARPC1B,CORO1B,LCP2,CITED2,RSRP1,STAT1,ARHGDIB,STOM,GPSM3,MYH9,OSTF1,YPEL5,ITM2B,ARL4A,FOS,RPS4Y1,MT-ND3,YWHAH,FOSB,GNG2,GADD45B,RPL36AL,HLA-B,M6PR,CCND2,PTPRCAP,SKAP1,SYNE2,CMPK1,…	6.EryMeg	Trisomy21vsGATA1s	3077
REACTOME_VIRAL_INFECTION_PATHWAYS	6.16729	2.44135889644267e-41	2.56548996145898e-39	801	TGFB1,ROCK2,ITGB1,TUBA1C,POLR2A,CD4,DNAJC3,RCOR1,MED13L,GPC4,STAT1,RUNX1,CLTC,RPN1,FUT8,CTDP1,NCOR1,JAK1,VCP,SMAD3,SYK,RIPK1,BTK,JAK2,TUBB1,IFNAR1,TUBB4B,AP2B1,YWHAZ,FYN,CHD4,YWHAB,CREBBP,FURIN,AP1G1,IGF1R,GTF2E2,SOS1,ITCH,MAN2A1,STAT2,PAK2,MGAT5,ATP6V1H,FNTB,MED21,BCL2L1,MED23,VPS4B,TRAF6,EP300,TBK1,PARP4,RCAN3,ATP1B3,PTPN11,ANO10,NUP93,IKBKG,PSMD1,GRB2,GTF2B,TSG101,ROCK1,RAB5C,MGAT4B,CUL5,PSMD1…	7.EMPP	NormalvsGATA1s	3091
MARSON_BOUND_BY_FOXP3_UNSTIMULATED	6.16502	1e-50	1.73279069767442e-48	1153	TGFB1,LAMTOR1,APLP2,FCGR2A,ZFP36L1,ARHGDIB,EMP3,FYB1,TRAPPC1,SLC39A3,CITED2,LIMD2,TSC22D3,TPST2,TXNIP,ARMC8,SLC9A9,DHRS3,C17orf49,ACTR2,CD84,DOK2,P2RY14,RHOA,PKM,RNASEK,CDKN2D,MICAL1,DNAJB6,LRP10,LCP2,RHOB,TMEM50A,ITM2B,PRKAR1A,CMTM6,PGAM1,ARHGAP10,CSK,PYGL,TSC22D4,HNRNPF,CTDSP1,ADD1,FOSB,GPD2,LAPTM5,OSTF1,NDFIP1,FYN,ARHGAP1,ECH1,FTH1,TP53INP1,STAT6,CERS2,MAPKAPK3,REST,SEC11A,ARHGAP12,MKNK1,NUDT4…	6.EryMeg	NormalvsGATA1s	3168
SCHAEFFER_PROSTATE_DEVELOPMENT_6HR_DN	6.16444	6.15972382873451e-36	4.06759816017849e-34	449	COL23A1,NR4A2,MBOAT2,PFN1,ITGB1,DHRS3,AUTS2,PPP1CA,GPD2,PSAP,TPM3,ZMYND8,GNAI2,CLTC,SNRPD3,SERF2,KMT2C,ARF3,LPP,ARPC4,RCOR1,RHOB,KIF2A,SDF2L1,DNAJB11,RSRC1,ARHGAP10,WASF2,MORF4L1,SEPTIN7,GRN,FURIN,TET2,CEMIP2,FGFR1OP2,NCOR1,SSH1,KDM5D,GSR,PTMS,TXLNA,GSPT1,SHKBP1,TJP2,EIF3J,SENP2,ATAD2B,PDZD8,CHD4,TAX1BP1,NEDD4,TAOK1,YWHAE,MOV10,ETS1,PKM,HSP90B1,BZW1,PRR13,PPP4C,BRD4,ABLIM1,MICU2,PHF6,CLPTM1,RFX7,…	6.EryMeg	Trisomy21vsGATA1s	3076
OSMAN_BLADDER_CANCER_UP	6.16288	6.30815213308822e-38	3.67449861752389e-36	390	KYNU,PDLIM5,TGFB1,FLNA,RNH1,BSG,CCND3,NEAT1,PDIA3,IGFBP7,KLF2,IQGAP1,CITED2,CALR,MALAT1,SPI1,FYB1,FCER1G,TUBB4B,HSP90B1,NCKAP1L,CTSD,RPS6KC1,ABHD17A,ALDH3B1,ZMAT3,PRNP,P4HB,IRF2BP2,PKM,EIF5,USP16,VASP,SCAMP2,PTPRC,ZFYVE16,SESTD1,CTSC,PIK3R1,EIF4G1,AKAP13,SPPL2A,ATG5,TPP1,TGOLN2,INO80D,PABPN1,ZNF641,SLC25A36,FBXW5,LNPEP,TMED7,CTSB,NFKBIZ,RAB10,ARPC4,GBE1,SECISBP2,PHACTR2,SDF4,AGPS,ACTR1A,YWHAE,PLS…	5.EryP	NormalvsGATA1s	3606
PODAR_RESPONSE_TO_ADAPHOSTIN_UP	6.16249	7.10335248676905e-34	3.18787673801768e-32	140	KLF6,AKR1C1,CD55,NEAT1,ZFP36L1,TNFSF9,BACH1,SQSTM1,YPEL5,TES,CLIC2,RPS6KC1,WDR26,KLF2,PIR,CDKN1C,PNRC1,MIR22HG,ZBTB43,MORC3,NCOA2,MAP1LC3B,EIF2AK3,PPP1R15A,ANXA1,MACO1,ZNF267,ATF3,TMCO3,DUSP1,GABARAPL1,IFNGR1,TUBA1A,FNDC3A,DDIT3,MAFG,ARMCX3,TRIB1,TUBB2A,IFRD1,BBC3,ADAM17,ZFAND5,RAP2B,HBP1,NLRP1,MBNL2,NFE2L1,GAB2,SLC7A11,HSPA1A,DNAJB9,DNAJB1,SLC38A2,GLA,DNAJB4,JUN,SEC24D,MAFF,FYN,KLHL21,HSPA1B,CCN…	5.EryP	Trisomy21vsGATA1s	3659
BLUM_RESPONSE_TO_SALIRASIB_UP	6.1606	1.42014151498294e-32	6.01865656832828e-31	232	TIMP1,CD55,BACH1,SQSTM1,HSP90B1,ELL2,TP53BP2,RELB,UBE2H,NFKBIA,TMBIM6,PTP4A2,SEL1L,MAP1LC3B,GLG1,PPP1R15A,KLF11,SCFD1,FOSL1,MAPK6,RIOK3,ATF3,COPA,SIAH1,GOLGB1,COG5,LAPTM4A,OGT,CDK13,PSEN1,STX5,MDM4,ATF6,HYOU1,CHIC2,ARF4,CSNK1A1,BIRC2,KPNA4,RALA,STAM2,SIAH2,SUCO,TNFAIP3,GALE,SLC33A1,NINJ1,MAFG,NAPG,SCAMP2,MKNK2,IFRD1,EIF5,USP25,GOLGA4,CBX4,CSNK1G1,TOM1,P4HB,CTSD,NAMPT,NPC1,ANXA7,SEC63,GFPT1,DNAJB9…	5.EryP	Trisomy21vsGATA1s	3658
WAKABAYASHI_ADIPOGENESIS_PPARG_BOUND_8D	6.1579	1.91748495498377e-39	1.44489270345242e-37	630	MEIS2,GNAQ,RABGAP1L,SGMS1,LIMS1,PRKAR2B,USP15,ROCK2,FNBP1L,DYRK1A,BIRC6,TOP1,SOS1,NCOR1,ARHGEF7,NUMB,ABHD2,OSBPL3,DCBLD2,SCAF4,ERP44,RAD51B,BCAS3,PICALM,DNAJB6,USP48,ATP6V1A,ANKRD17,ARHGAP18,FAF1,USP14,ANGPT1,CD164,CITED2,OSBPL9,TXNRD1,UBAP1,TSPAN14,GRTP1,EML4,APOBR,GRB2,RARS2,WDR41,ACACA,BABAM2,DIDO1,CCM2,ST3GAL3,MAP2K1,UBAP2,FBH1,MIB1,EZH2,SPAG9,ATE1,NFE2L2,GSK3B,HSD17B4,ATL2,TMEM135,SLC5A3,IBT…	7.EMPP	Trisomy21vsGATA1s	3210
REACTOME_CHROMATIN_MODIFYING_ENZYMES	6.15671	3.33082456622494e-32	1.72555217111375e-30	204	KMT2C,ATXN7,RCOR1,NCOA1,SMYD3,NCOR1,KDM6A,KDM4C,ATF2,NCOA2,ASH1L,EP300,UTY,KANSL1,JAK2,ARID2,ATF7IP,NSD1,PHF21A,GATAD2A,KDM5D,CREBBP,CHD4,PBRM1,ARID1B,KDM2A,EZH2,ING5,OGT,KDM3B,SETD3,EP400,YEATS2,KDM3A,TBL1XR1,BRD1,SMYD2,ELP4,HDAC8,SMARCC1,CHD3,TRRAP,SETD2,EPC1,BRWD1,PRMT3,EHMT1,ARID1A,KDM1A,KDM7A,ARID4B,DOT1L,ELP3,KAT2B,SUZ12,KANSL3,ATXN7L3,SAP130,SETD1B,MSL1,KAT7,HDAC10,KMT2D,PHF8,MORF4L1,KDM5B…	7.EMPP	Trisomy21vsGATA1s	3209
FOSTER_TOLERANT_MACROPHAGE_DN	6.15522	8.69262181608081e-35	5.10605974393408e-33	413	PDLIM5,ARMC8,JARID2,HDC,CHD7,MED13L,AFF1,LUZP1,ATP9B,TET2,LMNA,LCP2,AREL1,DCP2,MAP2K4,TIPARP,JAK2,ANGPT1,TNFSF9,TUT7,S100A10,USP25,CITED2,VEZT,SLC44A1,MPP7,ETV6,ATP11B,RANBP2,CEMIP2,TLK2,FMR1,SGK3,FKBP5,GNB4,IL15,ZNF800,TOR1AIP2,ZDHHC21,ARL4A,LNPK,ILRUN,B4GALT5,CCND2,NOCT,GSPT1,KLF7,DAAM1,TAB2,CA2,PLA2G4A,TRA2A,COL18A1,REL,TMEM50B,SEC24B,CTNNAL1,TAL1,APAF1,PIM1,CMTM6,ARF4,HIVEP2,HMGN3,LANCL2,EXOC…	7.EMPP	Trisomy21vsGATA1s	3208
SENESE_HDAC3_TARGETS_UP	6.15463	4.14731707980361e-35	2.62265085165208e-33	475	KYNU,SLC2A3,NR4A2,PAPPA,ABCC4,IQGAP1,YWHAZ,RHOC,IL1RAP,ACTR2,CD55,AKR1C1,KLF6,TNIK,MALAT1,BACH1,ITGB3,ZMAT3,ITGA6,PTBP3,SQSTM1,ARF3,JAK1,NEAT1,CPEB2,TMOD3,CD46,RHOB,PDGFC,VPS25,ATP6V1A,CPEB4,MMP14,TRAPPC10,UBE2F,STK10,STRN,GNG2,G3BP2,PTPN12,RNF19A,FCHO2,DCP2,SNAP23,PLD1,SMG1,GTDC1,CCND2,ZBTB38,ORMDL1,STK4,IGF2BP3,BMP2,NEDD4L,EIF4G1,CDV3,RAB35,PLCXD1,CHD4,TOP1,TAOK1,RB1,PLEKHB2,B4GALT1,GGA2,TPP1,G…	6.EryMeg	Trisomy21vsGATA1s	3075
FULCHER_INFLAMMATORY_RESPONSE_LECTIN_VS_LPS_DN	6.15186	2.52023890796995e-37	1.33322425635091e-35	438	KLF6,MAX,SPTLC2,MALAT1,HSPA5,SPN,NEAT1,CD4,SERPING1,BACH1,LYN,KLF10,LRP12,FYB1,PTGER4,CCNL1,NPL,KLF2,GADD45B,ATP2B1,MAP3K8,LCP2,SP100,SLC22A23,TGFBR2,FCHO2,VMP1,MPP1,RNASET2,ARHGAP12,ACAP2,SETX,QKI,POLR2A,CD84,WASHC2C,ZFP36,TIPARP,ATP2B1-AS1,RDX,CITED2,GNB4,WWP1,DUSP1,CHST13,ADGRE5,PCM1,CALCOCO2,HIPK1,STXBP3,IFI27L2,WASHC4,CERT1,CDK13,CD2AP,AP2A2,NREP,AFF1,LYSMD3,UNC93B1,FMR1,FUCA1,DIP2A,MBP,CREB…	5.EryP	Trisomy21vsGATA1s	3657
REACTOME_INFLUENZA_INFECTION	6.14986	3.43565272025508e-29	1.39330655426867e-27	157	RPS4X,RPS26,RPL7A,RPL12,RPS3,RPS14,SLC25A6,RPL18A,RPL10,RPLP0,RPL19,RPL6,RPL28,RPL29,RPL8,RPS5,RPS2,RPL18,RPS12,RPL11,RPS15,RPL22L1,RPL41,RPS28,RPS7,RPL3,RPL13,RPSA,RAN,RPL32,TGFB1,RPL30,RPL5,RPLP1,RPS8,RPL36AL,RPL35A,RPL36,CLTA,RPS13,RPS24,RPS3A,GRSF1,RPS27A,FAU,RPL10A,POLR2E,RPL24,GTF2F1,RPS15A,RPS21,POLR2F,CALR,NUP93,RPS19,POLR2C,PARP1,RPS9,SEC13,RPL26,RPS23,RPL22,RPL34,NUP35,RPL15,POLR2L,NUP6…	5.EryP	NormalvsTrisomy21	2851
BENPORATH_MYC_MAX_TARGETS	6.14383	5.23173125745895e-40	5.34711601532893e-38	738	ABCC4,ASAH1,PPP1R12A,JARID2,MAP3K5,ACTR3,PDCD10,RABGEF1,ARHGEF7,CD164,CYBA,PDK1,TRIM24,XK,U2AF1,CNOT2,SPTLC2,VCP,SMAD3,DDX17,GCLC,SRSF7,SYK,LNPEP,GALC,GMIP,PTPN1,CTSC,MBNL1,BLZF1,DDX3X,PDK3,IFNAR1,NFAT5,ADGRE5,OAZ1,AMMECR1,ILK,IER2,AGPS,THRAP3,FLOT2,PCYT1A,COG5,ACAD8,SQSTM1,MAN2A1,HSP90B1,AKAP9,TMSB4X,RAPGEF6,EPC1,CAPZA1,MADD,SERTAD1,EFTUD2,RNFT1,SNX3,MAPRE1,RAB3GAP2,CUL5,RGL2,STX7,PSMD14,DMTF1,C…	7.EMPP	NormalvsGATA1s	3090
DANG_BOUND_BY_MYC	6.1418	1.79630363638415e-38	1.15551877023263e-36	1010	RPS26,GAPDH,EIF4A1,ZFP36L2,ATP5PO,RPL10,RPL19,ACTG1,CCT8,LSP1,GSTP1,AKR1A1,SOD1,PKM,HINT1,ENO1,RPL8,APEX1,ATP5F1B,SRSF7,SERP1,EIF3K,RPS5,PHB2,APP,RBM8A,RPL18,CTSC,ATP5MC2,SLC25A3,SYNGR2,RPS15,GPSM3,NPM1,EIF3I,CPSF1,SRSF5,RNF7,CCT7,TAGLN2,PTPN6,HSPA8,RAC2,CSTB,HNRNPA1,CYBA,PMPCB,ABT1,FPGS,CTDSP1,CDK6,RBM15B,MAT2A,PSMC5,PSMB5,SEC61B,RBM3,JUNB,SCAND1,RHOG,NACA,PIGP,TGFB1,MYC,NME2,VCP,MIR155HG,UBXN1,…	6.EryMeg	NormalvsTrisomy21	3015
REACTOME_DISEASES_OF_SIGNAL_TRANSDUCTION_BY_GROWTH_FACTOR_RECEPTORS_AND_SECOND_MESSENGERS	6.13961	1.47924493416418e-34	8.48859016066523e-33	457	ITGA2B,VCL,TGFB1,LYN,PIK3CB,YES1,CLTC,SMAD3,AP3B1,TLN1,CTNNB1,IQGAP1,BIRC6,SOS1,NCOR1,LMNA,MAML3,STAT1,PIK3CA,ERBIN,FBXW7,PPP2R5A,APC,QKI,PTPN12,TFG,ZC3HAV1,BRAF,STRN,MARK3,BIN2,EP300,PTEN,MYH9,JAK2,PSMD1,POLR2A,TRIM24,MSN,RICTOR,PSME4,MAPK1,STAT5B,TGFBR2,ADAM10,FYN,TNKS2,EML4,PPP1CB,PSEN1,GRB2,KRAS,EIF2AK3,FRS2,ETV6,RANBP2,CTBP2,CREBBP,SEC31A,PPM1B,ATG7,PPP2CB,MAP2K1,CPSF6,ITGB3,SHOC2,CUX1,MIB1,…	7.EMPP	Trisomy21vsGATA1s	3207
SPIELMAN_LYMPHOBLAST_EUROPEAN_VS_ASIAN_DN	6.1394	1.27632456361945e-30	9.71829989155952e-29	584	IFITM1,ABCG1,SLC25A5,RBM3,SON,SF3A1,SUMO3,ATP5PO,ATP5F1B,DDOST,EIF5,DAZAP2,ICAM2,ERGIC3,HSPA8,ADH5,BTG2,EIF1AX,PSMB8,TTC3,RPN2,RAC2,SNX3,PDE4B,USP16,ATP6V1G1,LAPTM4A,SNRPB,PRDX3,MRPS7,ATP6V0E1,ZNF22,STAT3,ANXA11,STOML2,DNAJC15,SRSF6,GMPR2,PTDSS1,MYLIP,PNP,ARPC5,HSP90AB1,THEMIS2,MDH2,ABT1,NAPA,RHOB,MYD88,BIRC2,PWP1,CCT4,TNFSF10,GHITM,PSAP,UBE2L6,HADHA,PSPH,CDC123,PDCD6,CREM,GALC,RELA,SLC25A32,CD59…	7.EMPP	NormalvsTrisomy21	2753
VERHAAK_GLIOBLASTOMA_MESENCHYMAL	6.1342	5.32804154594774e-33	2.46744582401157e-31	215	KYNU,TIMP1,S100A11,STXBP2,NCF4,PTPN6,CD4,ANXA1,MYO1F,ARPC1B,FMNL1,S100A4,EMP3,TMBIM1,IQGAP1,MAN2B1,LAPTM5,FCGR2A,PTGER4,FES,TES,CLIC1,CTSZ,LGALS1,RELB,ELF4,SERPINE1,GNA15,FURIN,GRN,LCP2,STAT6,ALDH3B1,SP100,SLC10A3,RABGAP1L,MYH9,HEXA,RAC2,SLC16A3,TGFBR2,MFSD1,PTPRC,ANXA2,ZNF217,CTSC,TNFAIP3,FHOD1,TGOLN2,ICAM3,CPQ,ASL,CTSB,DOK3,ITGA5,DCBLD2,TCIRG1,MVP,TNFRSF1A,FNDC3B,PYGL,POLD4,TRIM38,TLR2,SH2B3,RR…	5.EryP	NormalvsGATA1s	3605
REACTOME_PLATELET_ACTIVATION_SIGNALING_AND_AGGREGATION	6.13248	3.70721776084621e-34	2.32121676773656e-32	260	GP9,LAT,TGFB1,GP1BB,CTSW,ITGA2B,TIMP1,FLNA,TMSB4X,APLP2,TAGLN2,ACTN1,STXBP2,TLN1,VCL,TRPC6,ALDOA,CD36,CD63,GNAI2,CD9,PFN1,FCER1G,PTPN6,WDR1,SERPING1,MAGED2,PSAP,PECAM1,PRKCB,CAP1,RHOA,MPL,FERMT3,PROS1,GP1BA,MMRN1,LCP2,RHOB,CALM1,RAC2,SYK,CLEC1B,CSK,SOD1,VTI1B,APBB1IP,PRKCD,THBS1,PRKCQ,HSPA5,FYN,ITGB3,ABCC4,MPIG6B,CFL1,GNG5,F2R,PLCG2,TBXA2R,PLEK,YWHAZ,PIK3CB,GNAQ,P2RY1,SERPINE1,GNG11,RAC1,ACTN4,GN…	6.EryMeg	NormalvsGATA1s	3167
REACTOME_RHO_GTPASE_CYCLE	6.12645	7.13204659138201e-35	4.25640540573678e-33	447	DLC1,ARHGAP6,STAM,ACTN1,CDC42BPA,ITGB1,ROCK2,CLTC,FNBP1L,PLEKHG1,IQGAP1,SOS1,ARHGEF7,CDC42SE2,PIK3CA,NET1,ARHGAP21,TMOD3,ERBIN,ARHGAP12,PICALM,USP9X,SCFD1,ARHGAP15,PLD1,ARHGAP18,ABI1,CYBA,DBN1,PREX1,MTR,CCDC88A,WASL,STAM2,CUL3,ARHGAP10,GRB2,FRS2,WDR11,MPP7,SOS2,ABCD3,RALGAPA1,MACO1,RHOC,DOCK11,FGD4,FARP2,ROCK1,TFRC,ESYT1,KIDINS220,GMIP,STK10,TMEM87A,DOCK7,DIAPH1,CAPZB,FAM91A1,SRGAP1,MYO9A,ITSN1,N…	7.EMPP	Trisomy21vsGATA1s	3206
WAKABAYASHI_ADIPOGENESIS_PPARG_BOUND_8D	6.12569	4.80733226389134e-41	2.93917142265291e-39	630	MEIS2,CD164,DNAJB6,LIMS1,SGMS1,KLF10,RABGAP1L,AHNAK,GNAQ,DYRK1A,ARHGEF7,GNAS,ABHD2,SPAG9,NUMB,ERP44,GRTP1,VMP1,SCAF4,CYLD,RBM39,VCP,FNBP1L,TMBIM6,ATP6V1A,TXNRD1,UBAP1,TSPAN14,NCOR1,SYAP1,USP15,PRKAR1A,CORO1B,CHD1,BIRC6,DCBLD2,AKIRIN2,SDE2,USP14,CITED2,ROCK2,TOP1,ZFP91,PER1,MAP2K1,USP48,GSK3B,BCAS3,EML4,CYB5R3,JAK3,OSBPL3,APOBR,YWHAH,LYSMD3,MEF2D,DUSP22,UBE2W,NUMA1,HSD17B4,DIDO1,DCTN4,PAFAH1B1,ATL…	5.EryP	Trisomy21vsGATA1s	3656
DEURIG_T_CELL_PROLYMPHOCYTIC_LEUKEMIA_DN	6.12568	5.44911307648181e-35	2.60544451522294e-33	318	PTPRC,DNAJB6,LUZP1,PRKCB,CTSW,PJA2,RABGAP1L,TES,TRAPPC10,TAB2,CDC42,RNF19A,LCP2,PPP1R12A,TGFBR2,CYLD,KDM2A,ARID4B,TNIK,CD84,ZBTB43,TPST2,TIPARP,SNRK,BAZ2A,ZNF292,PPP1R16B,TFIP11,RDX,NCOA1,USP47,RTN4,USP48,PIK3R1,EML4,PCM1,PSME4,MAP3K5,ACSL3,MCM9,MALT1,GALNT10,ZBTB38,DERL2,MBP,KLHL2,STK17A,HBS1L,THOC1,ARL6IP5,EVI2B,STAT3,WDR37,DCLRE1C,ZNF394,OGA,PHACTR2,SEC23A,IDS,GIT2,USP16,CCL5,FBXO42,SERINC1,GT…	5.EryP	Trisomy21vsGATA1s	3655
LU_EZH2_TARGETS_DN	6.11842	6.67438774554444e-36	3.23274403857246e-34	387	VCL,GPC4,LRBA,RUFY1,RABGEF1,ATP2C1,ELL2,DIPK2A,ELF4,NPL,ATP2B1,TGFBR2,BTAF1,PHACTR4,MAGED2,EIF4G2,ELOVL6,MCL1,CREB1,CTNNA1,PPTC7,PTPN12,CPSF6,CCDC91,IGF2BP3,SERPINH1,DCP2,BMPR2,WASL,RAB11FIP1,BLZF1,SENP2,SEC24B,SDCBP,ATP2A2,SLC39A11,MAGT1,N4BP2,RNF38,DLEU2,BIRC2,TNFAIP3,GAD1,DYNC1LI2,TRIM33,SEMA3C,APAF1,NEU1,NPIPB4,SPTLC1,GNA13,TACC1,MTPN,SFT2D2,KPNA3,LPXN,SLC15A4,ANKRD17,PI4KA,PPP2CB,ACO1,RASSF5…	5.EryP	Trisomy21vsGATA1s	3654
GRAESSMANN_RESPONSE_TO_MC_AND_DOXORUBICIN_DN	6.1184	2.69016966802691e-43	1.80774554538854e-41	758	KLF6,DBN1,MSN,YES1,PLP2,ZFAND3,PTBP3,TPM3,YWHAZ,TXNIP,ANKRD28,ERC1,BNIP3L,SEC14L1,NUMB,HPS1,STAT5A,GRTP1,PRMT2,RBM39,ARPC1B,ARID4B,XPR1,STAT5B,AP1G1,PBX2,LMBR1,TRAF6,ZNF644,VTI1A,RILPL2,FER,CNOT2,ZNF292,VASP,NORAD,FOXN2,USP22,ABCC1,TCF3,NECTIN2,FOXJ3,FAR1,CSDE1,OGT,RIPK1,SPEN,STK3,CD2AP,TFRC,SLC39A11,ATF6,USP34,CHD4,WAC,MSH3,NR1D2,STAM2,DCTN4,RGS19,BCL3,CDKAL1,PHIP,DCAF8,PHF21A,KMT5B,CSNK1D,RYK,F…	5.EryP	Trisomy21vsGATA1s	3653
JOHNSTONE_PARVB_TARGETS_3_UP	6.11732	2.24107379166188e-38	1.89752736609917e-36	424	TIMP1,ASAH1,FLNA,APLP2,CST3,S100A4,CAPN1,CTSA,CD9,ACTB,CYTOR,CITED2,ARPC1B,TXNIP,GSN,C17orf49,PSAP,FLOT2,HLA-B,IQGAP1,ANXA1,C15orf39,CD55,ATP6V0C,AKR1C1,RHOB,CALM1,POLD4,MYH9,PYGL,JAK1,SQSTM1,MGAT4B,GRN,WASHC2C,F11R,THBS1,NDFIP1,TCIRG1,KLF10,ECH1,EIF4G1,LGMN,C19orf33,STAT6,ELOVL6,PRDX5,PAK2,DDOST,FUT8,TNIK,ACSL5,CSF1,OSBPL3,ARAF,FXYD5,PRPF8,ORAI3,DAG1,COL18A1,FLII,HSD17B4,CD58,NEAT1,MOV10,TINF2,P…	6.EryMeg	NormalvsGATA1s	3166
FORTSCHEGGER_PHF8_TARGETS_DN	6.10813	1.65269302355539e-42	1.07195106632171e-40	753	KLF6,DNAJB6,AGPAT3,PTBP3,INF2,LRP12,RABGAP1L,ELL2,TAOK3,PTGER4,PPP1CB,CD9,CCND3,PPP1R18,S100A4,AHNAK,GNAQ,RELB,MBNL1,RAB2A,PTGS1,ERC1,F11R,PPP1R12A,CPEB4,LAT2,CTNND1,FCHO2,MPP1,AFF4,AGPAT4,ATP11A,CLASP2,RAB1A,XPR1,TMBIM1,PLEKHB2,SNX29,TSPAN14,NUFIP2,AP1S2,BTBD1,LCOR,PTPN12,ZC3HAV1,RAB8B,MAP3K2,CEMIP2,FER,GATAD2A,DCAF6,MTCL1,DCP2,HIVEP2,USP14,TBL1XR1,CHP1,GNB4,USP22,VPS37A,LGALS1,GNB1,MICALL2,MAN1…	5.EryP	Trisomy21vsGATA1s	3652
GRYDER_PAX3FOXO1_ENHANCERS_IN_TADS	6.10622	7.50534271430828e-43	6.22276303712982e-41	990	STXBP5,CRPPA,DNM3,HERC2,IRX1,MEIS2,ZFP36L1,MYO18B,OAZ1,LRRFIP2,CD9,ACTB,STK24,ITGB1,YWHAZ,IL1RAP,ZNF804A,CHD7,SGMS1,AUTS2,PTTG1IP,WDR1,ILK,GNAS,NLGN1,GLUL,JARID2,SNRPD3,FYN,CITED2,FOXN2,ARPC2,CAP1,MAGED2,DNAJB6,UBR3,NCAM1,PRKAR1A,PSMD6,PDGFC,STX11,HP1BP3,MYH9,ARHGAP12,TUT7,TFPI,USP15,RPS6KC1,HDAC5,RNF216,MRPL23,PREX1,DAAM1,VTI1A,GSE1,SPRY1,MED13L,TGOLN2,OBSL1,PTPN12,LNPK,ACAD8,MOCS2,DCP2,R3HDM2,T…	6.EryMeg	Trisomy21vsGATA1s	3074
MULLIGHAN_MLL_SIGNATURE_1_UP	6.10309	2.32925382159142e-36	1.15826028368336e-34	378	CYBA,FLNA,ACTR2,C15orf39,MYO1F,TRAPPC10,CTSA,ARPC2,CCND3,S100A4,TGOLN2,ELF4,OSBPL8,OAZ1,MBNL1,ABHD2,JMJD1C,FCGR2A,LAT2,SPI1,B4GALT1,MRTFA,ARPC1B,SYK,LAPTM5,LAMP1,GLG1,GRN,RAB6A,EHBP1L1,TPP1,DNM2,TANK,NIPBL,CHD3,LGALS1,PSEN1,APOBR,PRKCD,SLC16A3,MALT1,ABHD17A,KLC1,PTK2B,ATP6V0E1,FUCA1,C11orf21,RNF167,FAM53B,IGFBP7,SLC43A3,PLD3,MFSD1,PCYT1A,RASSF2,ARL6IP5,TRIM38,SFMBT1,AKR7A2,EVI2B,GRB2,FES,HDAC6,AR…	5.EryP	Trisomy21vsGATA1s	3651
HOLLMANN_APOPTOSIS_VIA_CD40_DN	6.09963	7.62642763609664e-28	4.94855678439593e-26	252	IFITM1,SERPINB1,GMFG,HLA-E,VIM,SPINT2,IGLL1,HLA-B,EEF1D,RPL8,PSMB8,CTSC,S1PR4,CXCR4,PDE4B,ACOT2,MRPL57,PSME1,S100A11,GSDMD,ATP6AP1,RPL36AL,ZNF22,DNMT3A,LITAF,CRYZL1,MYD88,PPP1CA,GAB2,UBE2L6,PSPH,SMIM10L1,NPC2,PYCARD,CASP4,TCF4,MGAT2,GSTM1,AEBP1,TES,ZNF195,CPVL,DECR1,NINJ1,NDUFB8,PCBD1,RASGRP2,RHOA,SETMAR,RRBP1,HSBP1,BDH2,ZAP70,QPRT,DNPEP,PDLIM1,ZNF544,HDAC9,AGPS,SERPINH1,CASP6,SLC16A3,GTF2H5,SMAR…	7.EMPP	NormalvsTrisomy21	2752
KRIGE_RESPONSE_TO_TOSEDOSTAT_24HR_UP	6.09698	1.16197227560297e-44	1.33197775777196e-42	734	PLP2,TYROBP,HCST,SLC2A3,MYL12A,PRMT2,FCER1G,LGALS1,BIN2,TSC22D3,GPSM3,TXNIP,DBN1,RHOBTB3,CD55,AP1G2,LRP10,LPP,EHBP1L1,ITM2B,JAK1,SQSTM1,NFIL3,PTH2R,F11R,FYN,MBD6,KLF10,FTH1,G6PD,CCDC92,ZNF641,PREX1,SERPINB1,SP100,RSRP1,SLA,ANXA3,PLEK,SYNJ1,C11orf21,BMP2K,C18orf32,CDC42BPA,CPEB4,TNFAIP8L2,CPEB2,PTPRC,CTBS,YPEL5,VSIR,AP1S2,ORAI3,AGA,RETN,RPS6KC1,TRAF3IP3,PTBP3,CHFR,NEAT1,HLA-A,SSH1,PLSCR1,MYO1G,RNF…	6.EryMeg	NormalvsGATA1s	3165
ENK_UV_RESPONSE_KERATINOCYTE_UP	6.09525	4.31820130181523e-40	3.87649613250907e-38	510	TGFB1,KYNU,S100A11,TAGLN2,OAZ1,STXBP2,B2M,RNH1,CYBA,MRPS12,ALDOA,EMP3,ATP6V0E1,RPS10,GSTP1,PFN1,LY6E,LGALS1,CD4,NR4A2,CITED2,PPP1CA,GNAS,MYCN,PTGS1,TALDO1,NUCB1,MAGED2,GSN,HLA-B,RPN1,SNTA1,CAP1,VCP,IER2,ATP6V0C,TNFSF9,AP1G2,ALOX12,DNAJB6,CDK2AP2,CDC37,ITM2B,PMVK,POLD4,ZFP36,COMT,GRN,COPE,PPIF,STX11,FOS,GPX4,VASP,TCIRG1,SELPLG,ETS2,ECH1,LGMN,CFL1,ASL,SEPTIN5,MMP14,DRAP1,RALY,UQCRC1,GADD45B,EIF4E2,…	6.EryMeg	NormalvsGATA1s	3164
DOUGLAS_BMI1_TARGETS_DN	6.09294	3.3720327345143e-35	2.28409235498782e-33	307	MLC1,IL1RAP,TMBIM1,FAM234A,AGPAT3,LIPH,LPP,TPM3,SQSTM1,SHKBP1,MFSD1,ATP6V0D1,ECH1,TAF10,ZDHHC12,STAT6,M6PR,STAT1,SP100,PHKB,CPEB4,ICAM2,SUN2,IRF9,HMOX2,TM7SF3,MOCS2,PIK3CB,CLIC2,VEZT,TMEM175,PPCS,PIGS,CCNDBP1,BIRC2,NIT1,MTMR14,IFI35,MVP,TMEM179B,CTSD,ABHD4,STYXL1,TPP1,TDG,MR1,NKIRAS2,PBXIP1,RMND5B,NIPAL3,YIPF4,STX4,CYB561A3,N6AMT1,NAGK,VPS36,TMEM164,DCP2,BCL2L13,DBNL,MIF4GD,APAF1,ICAM1,TBC1D13,AT…	6.EryMeg	NormalvsGATA1s	3163
ROSS_AML_OF_FAB_M7_TYPE	6.09189	1.15790494646338e-30	6.04215853881798e-29	69	RHAG,GP1BB,LAT,PDLIM5,GATA1,ITGA2B,DLC1,DNM3,ANK1,KEL,MRPS12,ABCC4,ARMC8,RYR3,CD164,FADS2,PDCD10,PTGS1,CAVIN2,GJA4,HIGD1A,UROD,TNIK,PROS1,BMP2K,ZMYND8,TPM1,GP1BA,SERPINI1,CMAS,PSMD6,ICAM4,NET1,PCDH9,SLC39A4,RDX,DRAP1,TFR2,MYL4,TAL1,PRUNE1,RASA1,NEO1,TEK,CTNNBL1,PCCB	6.EryMeg	Trisomy21vsGATA1s	3073
ENK_UV_RESPONSE_KERATINOCYTE_DN	6.09093	6.36548296997232e-34	3.71087765015105e-32	473	SLC2A3,KIFAP3,DHRS3,MAP3K5,TPST2,ACTR2,GNAQ,MACF1,ROCK2,ZMYND8,CLTC,PTP4A2,PRKAR1A,CD46,SEMA3C,DDX17,KIF2A,ATP6V1A,DDX3Y,CTNNA1,EBAG9,YES1,TRIP12,FOS,FNTB,ACTR3,NMI,TBXA2R,G3BP2,RAB14,AUH,SP100,NCOA3,C1D,CCND2,ATP2C1,RDX,FKBP5,ITSN1,IGF2BP3,TJP2,KHSRP,EIF3J,ARHGEF7,TOP2B,PCMT1,MKRN1,NPTN,AFF1,CD58,LAMP2,RGS19,ARL6IP5,ANP32A,STXBP3,RB1,NPEPPS,MAN2A1,PTPN1,TM9SF2,SCFD1,ASH2L,AKAP10,ANXA7,FMR1,MAP4,…	6.EryMeg	Trisomy21vsGATA1s	3072
HALLMARK_TNFA_SIGNALING_VIA_NFKB	6.08916	3.93409251569198e-32	1.63024422636369e-30	199	KYNU,PDLIM5,KLF6,NR4A2,SLC2A3,TNFSF9,SMAD3,SQSTM1,NFAT5,KLF10,CD83,FOSB,RHOB,PTGER4,RELB,CCNL1,KLF2,GADD45B,NFKBIA,ATP2B1,MAP3K8,REL,STAT5A,B4GALT1,PNRC1,FOS,MCL1,NFIL3,KDM6B,NFKB1,SERPINE1,ETS2,ZBTB10,ZFP36,TIPARP,PPP1R15A,FOSL1,ATF3,TANK,DUSP1,PER1,JAG1,MAP2K3,IER2,KLF9,NFKB2,ICAM1,BMP2,SOD2,BIRC2,BCL3,TNIP1,TNFAIP3,IRF1,NINJ1,TRIB1,TUBB2A,SDC4,PTGS2,MXD1,IL6ST,NR4A1,BCL6,JUNB,BTG2,B4GALT5,ABCA…	5.EryP	Trisomy21vsGATA1s	3650
RODRIGUES_THYROID_CARCINOMA_POORLY_DIFFERENTIATED_UP	6.08836	5.37778798959411e-38	4.66554374306531e-36	625	IL1RAP,STAM,CYTOR,EIF4G2,VPS50,RHOBTB3,ITGB1,ANXA1,CTSA,JPT1,HACD1,OSBPL3,GPD2,RSRC1,ACTR2,USP16,APC,TNFSF9,PTPN12,CCDC88A,TANK,ELOVL6,LNPEP,AGFG1,GALC,ZNF644,CTSC,MBNL1,KIF5B,STAM2,DDX3X,ABCD3,USP47,YWHAZ,DCUN1D1,EDRF1,SNCA,MRPS12,FRYL,AGPS,WDR41,SERPINH1,ITCH,SS18,TFDP2,TFRC,PPP2R3C,ODF2L,EVI5,SRSF6,CD58,YTHDF3,AFF4,FAF1,YME1L1,MICU1,BNIP3L,ATP1B3,SOAT1,IGF2BP3,PSMD14,XRCC4,SLC7A11,SLC39A9,GALE…	7.EMPP	NormalvsGATA1s	3089
FORTSCHEGGER_PHF8_TARGETS_DN	6.08566	1.55127707218158e-41	1.24435773747039e-39	753	GNAQ,RABGAP1L,PPP1R12A,LRP12,FER,MBNL1,PTBP3,ELL2,DCAF6,CLASP2,SMYD3,RAB2A,CPEB4,FUT8,INF2,OSBPL3,ERC1,UBR1,VPS13A,ATP11A,MICALL2,LCOR,PTPN12,ZC3HAV1,KLF6,XPR1,DCP2,DNAJB6,FCHO2,AGPAT3,DENND1A,PTGS1,USP14,CTNND1,SDCBP,AMMECR1,HIPK1,SNX29,PLEKHB2,TSPAN14,AFF4,NUFIP2,CD9,EIF4G3,PPP1CB,GATAD2A,GRB2,VPS37A,ULK2,TVP23C,S100A6,TMEM164,TDG,GBE1,CEMIP2,SENP7,CCNL2,TENT2,HS2ST1,CCND3,EIF1AY,TACC1,NFE2,MSH…	7.EMPP	Trisomy21vsGATA1s	3205
JIANG_MELANOMA_TRM3_CD8	6.08519	6.58931920578839e-33	3.66936566519351e-31	419	CYTOR,PLP2,CTSW,S100A4,TMSB4X,MIR4435-2HG,IL2RG,ZFP36L1,S100A11,OAZ1,ITM2A,ALDOA,LIMS1,B2M,PFN1,LMNA,CD63,ACTB,MYL6,IQGAP1,LY6E,IFI27L2,ARPC3,PPP1CA,SH3BGRL3,TRAPPC1,HSPA5,CDKN2A,TPM3,CAPZB,RHOA,ANXA5,SNRPD3,ARPC5,ARPC2,STAT1,CLIC1,CAP1,RAB11A,CYB5R3,HLA-C,SEC11A,PDIA3,SUB1,TALDO1,RPS27L,GNG5,LGALS1,HERPUD1,HMGN1,UBC,YWHAB,PGAM1,RAC1,CDK2AP2,SP100,CD7,HLA-B,RNF19A,COPE,CCND2,LINC00649,BLOC1S1,FKB…	6.EryMeg	Trisomy21vsGATA1s	3071
CHEN_HOXA5_TARGETS_9HR_UP	6.07995	1.46235575814364e-30	9.09219692625811e-29	217	BACH1,PPP1R12A,FOSB,C21orf91,IFRD1,CNOT2,CENPC,TANK,MORC3,ATAD2B,NCOA3,ETS2,EDRF1,GADD45B,IER2,TDG,PTPN2,NFIL3,TUT7,BIRC2,RELB,TBK1,CRY1,TSC22D1,DMTF1,IRF7,THUMPD2,TAF2,EIF5,GAD1,KMT5B,RCHY1,AKAP10,ZNF267,CDK17,DCLRE1C,DAAM1,FOS,ODR4,ZCCHC10,TSC22D2,MARK3,TIPARP,CCNL1,RIC8B,CDK7,KLF6,AVL9,CTH,NRBF2,EGR1,RBM5,BTN2A1,GPATCH2,CAB39,PYROXD1,PSPC1,ING3,LIG4,TNFRSF10B,CHD9,KDM3A,TLK2,CCNT2,RBM39,PTGS2,…	7.EMPP	NormalvsGATA1s	3088
WP_VEGFAVEGFR2_SIGNALING	6.07877	7.91954705146637e-38	4.57737541207235e-36	428	TMSB4X,TUBA1C,TXNIP,NR4A2,C15orf39,BSG,PTPN6,HERPUD1,PRKCB,NR4A1,VCL,ANXA1,NFKBIA,PDE4DIP,IGFBP7,IQGAP1,SH3BGRL3,STAT1,CALR,CLIC1,STAM,RHOC,ALDOA,PPP1CA,MEF2C,EPB41,SDF2L1,TPM3,NAPA,STAT6,PFN1,PAK2,P4HB,SOD2,MYH9,CAPZB,EIF4G2,JUN,NFATC1,HDAC5,NR4A3,MAP2K1,PDIA6,BMP2,JAG1,PBXIP1,CTNNB1,CSK,PIK3R1,EIF4G1,ICAM1,ATP6V0D1,HYOU1,EGR1,TMSB10,PRKCD,PRKD1,NFKB1,TPP1,ROCK2,FHOD1,HGS,PGK1,SYNJ1,RAB37,HSPA1A…	5.EryP	NormalvsGATA1s	3604
HALLMARK_HEME_METABOLISM	6.07672	1.32207379310171e-29	7.82856553200943e-28	193	RHAG,ANK1,GATA1,BACH1,ELL2,GYPB,KEL,CA2,MBOAT2,GYPE,USP15,NCOA4,FBXO34,BMP2K,TRIM58,EPB41,XK,SPTA1,DMTN,CLIC2,NFE2,GCLC,SYNJ1,CCND3,NUDT4,TENT5C,ADD1,TOP1,BSG,SELENBP1,DCUN1D1,SNCA,YPEL5,SLC10A3,TFDP2,TFRC,GYPA,RNF19A,CDR2,CA1,BNIP3L,SDCBP,PICALM,UBAC1,FECH,SLC7A11,NNT,TMEM9B,MKRN1,CPOX,AGPAT4,DAAM1,EIF2AK1,LPIN2,KAT2B,LRP10,MARK3,ABCB6,SPTB,SLC2A1,ERMAP,NFE2L1,KDM7A,NARF,RBM5,CTNS,TRAK2,CAST,MPP…	7.EMPP	NormalvsGATA1s	3087
REACTOME_METABOLISM_OF_LIPIDS	6.069	1.45963633209871e-38	1.04728906828082e-36	730	ASAH1,CYP7B1,CD36,RUFY1,MBOAT2,MFSD2B,PIP5K1B,LTC4S,HACD1,SPTLC2,FADS2,CTSA,PTGS1,SGMS1,AKR1C1,PPP1CA,GPD2,PSAP,LIPH,PIK3CB,OSBPL6,AGPAT3,PMVK,ARF3,SLC44A1,ALOX12,LGMN,MBOAT1,GPX4,CROT,PIP5K1C,AGPAT4,ELOVL6,ARNT,OSBPL3,TBXAS1,ACSL5,MED13L,ABHD4,HACD4,RAB14,NCOA3,PNPLA8,ACADS,AKR1C2,GPS2,PLD1,M6PR,PNPLA2,HSD17B4,NCOR1,PPP1CB,DECR1,ORMDL1,NCOA1,SYNJ1,OSBPL5,ABHD5,ACOT4,PRKACA,PNPLA6,HSD17B12,PRKD1,…	6.EryMeg	Trisomy21vsGATA1s	3070
REACTOME_INFECTIOUS_DISEASE	6.06745	1e-50	1.73279069767442e-48	993	TGFB1,TUBA1C,FCGR2A,B2M,CYBA,GNAI2,CD9,RPS10,ARPC3,ACTB,PTPN6,CD4,ARPC1B,PPP1CA,GNAS,PRKAR2B,ARPC2,TXNIP,ACTR2,HLA-B,RPN1,ARPC5,RPL36AL,ITGB1,VCP,DAD1,AP2M1,YWHAB,ROCK2,GPC4,PSMD6,VPS28,TUBB1,RAB5C,BTK,HLA-C,CALM1,SYK,PRKAR1A,VPS25,MYH9,COMT,JAK1,MGAT4B,IFNAR1,FYN,ARPC4,YWHAH,STAM,NCKAP1L,FURIN,TAF10,IKBKG,BCAP31,REST,SEC11A,HSPA8,STAT1,GNG5,PAK2,DDOST,FUT8,PLCG2,JAK3,HNRNPK,TUBB4B,PPIB,ACTR3,YWH…	6.EryMeg	NormalvsGATA1s	3162
LU_EZH2_TARGETS_UP	6.06739	2.57480352404283e-29	1.04990075936654e-27	272	PFKL,MATK,NME2,LSM7,THOC3,TOMM22,RPL36,SDHC,UBE2L6,TMEM141,PSMB8,PHF5A,HYAL3,DDIT4,CENPV,SCAND1,C8orf82,MIEN1,S100A6,NENF,ZNRD2,NDUFA8,NAA38,OXLD1,PEX16,MYL6B,MPG,MAPKAPK3,HDGFL2,MTX1,S100A4,STUB1,EMC6,WDR74,PLEKHJ1,BST2,ZNHIT1,SERF2,CHST14,SHARPIN,POLR2C,GANAB,KRTCAP2,SURF2,REEP5,RCC1L,UQCR10,PRDX4,ELOB,AP1S1,LAMTOR4,NOLC1,PSMD4,CBR1,OGFR,RPUSD1,PSMC3,TRAPPC5,ECHDC3,PSMB10,DPM3,WDR54,KLHDC3,ZNF6…	5.EryP	NormalvsTrisomy21	2850
DURCHDEWALD_SKIN_CARCINOGENESIS_DN	6.06723	8.99414282397653e-32	4.59563736074417e-30	258	APLP2,PIP5K1B,MACF1,PIK3CB,SEMA3C,ITGB1,PTBP3,ELL2,MAP4K4,ATP2C1,RANBP9,YWHAZ,SMG1,CPEB4,NET1,QKI,PTPN12,KLF6,AHCYL2,MBOAT1,RUNX1,DIP2B,TIPARP,PLD1,MYH9,SMURF1,CTNND1,ATF7IP,RBM25,RIPK1,B4GALT1,TAOK1,RNF38,CCDC88A,UBAP1,AFF4,ARNT,ASAP1,MED13,STK3,PIAS1,LARP4B,SEMA4D,LXN,NPLOC4,LTN1,CREBBP,ITGA6,GSR,TPM1,KIF5B,ATP13A3,CEP350,CCNY,COMMD10,NFE2L2,GSK3B,BTBD10,ARID3A,DLG1,UBE2Q2,STIM2,PXK,WDFY2,ADARB…	7.EMPP	Trisomy21vsGATA1s	3204
REACTOME_CLASS_I_MHC_MEDIATED_ANTIGEN_PROCESSING_PRESENTATION	6.06663	9.48135989609312e-34	6.80196405622603e-32	377	HERC2,PRKN,CD36,ZBTB16,RNF182,PDIA3,HSPA5,CYBA,NCF4,UBR4,KLHL2,TRIP12,LNPEP,BTK,AREL1,HECTD1,UBE2E1,MYLIP,LTN1,PJA2,WWP1,WSB1,RNF130,UBE2Q1,FBXL4,ITCH,UBE2Q2,UBE2F,SMURF1,HERC3,RNF19A,HUWE1,RNF115,IKBKG,UBAC1,PSMD1,FBXL20,CUL5,PSMD14,HLA-B,NEDD4L,MKRN1,RLIM,HECTD3,LNX1,SIAH1,RCHY1,NPEPPS,CHUK,FBXL3,B2M,UBE2G2,ATG7,CBLB,KLHL20,PSMD11,RNF14,UBE2D1,FBXW7,ASB8,FBXW2,UBE2W,UBR1,PIK3C3,CDC16,VAMP3,CUL2…	7.EMPP	NormalvsGATA1s	3086
BLANCO_MELO_BRONCHIAL_EPITHELIAL_CELLS_INFLUENZA_A_DEL_NS1_INFECTION_UP	6.06627	4.50315985456089e-39	2.58377456578228e-37	621	DLC1,TNFSF9,B2M,C15orf39,HLA-A,LYN,HLA-B,ELF1,KLF10,CD83,FYB1,RABGAP1L,STAT1,CLIC2,RHOB,HLA-C,CSRNP1,SWT1,HSH2D,CCNL1,KLF2,PTGS1,RASGEF1B,NFKBIA,SP100,IRF9,STAT5A,PHACTR4,CDKN1C,MEF2C,CYLD,PNRC1,CAB39,NFKB1,ETS2,MORC3,ADAM8,ZFP36,ADAR,NFATC1,TIPARP,RAB8B,RICTOR,STX11,ZNF267,CAVIN2,CITED2,GPBP1,TICAM1,GNB4,IRF7,DUSP1,IER2,RIPK1,KLF9,NFKB2,ICAM1,DDX3X,BIRC2,TENT2,UNC93B1,FMR1,ZNF107,BCL3,NFKBID,XBP…	5.EryP	Trisomy21vsGATA1s	3649
REACTOME_AEROBIC_RESPIRATION_AND_RESPIRATORY_ELECTRON_TRANSPORT	6.06426	4.40640234274778e-29	1.76777281083785e-27	254	ATP5PO,ATP5F1B,ATP5PF,ATP5MC2,MDH2,PYURF,NDUFA11,ATP5F1D,TRAP1,NDUFV3,MT-CO2,PNKD,UQCRC1,LDHB,OXA1L,PKM,NDUFA13,ATP5F1A,COX5A,SDHC,NDUFB2,NDUFB8,NDUFS2,UBB,CYC1,RPS27A,SDHD,MPC2,NDUFS3,UCP2,NDUFV1,NDUFA8,COX20,NDUFAF3,ETFA,NDUFAB1,SLC25A11,NDUFB5,NDUFB11,NDUFAF8,ECSIT,IDH2,PDHB,ATP5PB,SDHAF2,ATP5MF,VDAC1,PDHA1,LDHA,NDUFC1,GOT2,UQCR10,ATP5MG,NDUFA7,PET117,TMEM126A,FH,ETFDH,LETM1,SIRT3,MT-CO3,NDUFS…	5.EryP	NormalvsTrisomy21	2849
KEGG_UBIQUITIN_MEDIATED_PROTEOLYSIS	6.06264	8.91116707504456e-30	4.34608684405114e-28	132	PRKN,HERC2,UBE2Q1,MID1,TRIP12,UBE2F,NEDD4L,ANAPC11,ITCH,TRAF6,NEDD4,UBA6,FBXW7,WWP1,UBE2W,RBX1,BIRC2,UBE2L3,HUWE1,CDC34,SMURF1,UBA7,UBE2K,CBLB,RCHY1,WWP2,KLHL9,SAE1,UBE2Q2,UBE2J1,HERC4,CUL2,UBE3B,UBE4A,CDC16,PPIL2,XIAP,UBE2J2,PIAS1,UBE2A,STUB1,UBE2D1,ELOB,MDM2,UBE4B,UBA3,SYVN1,SMURF2,MAP3K1,COP1,PIAS4,UBE2G1,UBE2D4,CBL,ELOC,BIRC6,SIAH1,CUL3,HERC3,FZR1,FBXW11,FANCL,RHOBTB2,ANAPC4,UBE2C,UBE2Z,ANAPC…	6.EryMeg	Trisomy21vsGATA1s	3069
IKEDA_MIR30_TARGETS_UP	6.06129	2.00995668155275e-31	8.14797113462061e-30	116	ACTN1,CELF2,NFAT5,PTBP3,YWHAZ,ATP2B1,PDCD10,CPEB2,PPP1R12A,CPEB4,SCAF4,FNDC3B,ARID4B,XPR1,ELMO1,USP15,KRAS,CAPZA1,SON,USP47,EPC2,ITSN1,MAN1A2,MAP4K4,NCAM1,CCND2,USP34,ARF4,WDR44,FNDC3A,KDM3A,SPPL3,PLCB4,TAOK1,GNA13,SSBP2,SOCS6,MAML1,GALNT7,GOLGA4,ELL,UBE2J1,P4HA1,CSNK1G1,CHD9,SEC23A,B4GALT5,SLC6A6,PPFIA1,PTPN2,ARID4A,TNRC6A,PAPOLA,TBC1D15,RNF44,RAP2C,JUN,PELI1,LRRC8D,AP3S1,CPNE8,WDR7,CLOCK,RASA1,…	5.EryP	Trisomy21vsGATA1s	3648
OSMAN_BLADDER_CANCER_DN	6.06047	1.16988975998613e-32	6.10306126538221e-31	404	RABGAP1L,ZFP36L1,EPB41,PRMT2,RNF216,RBM33,RIPK1,TGFBR2,RHBDD1,CHD2,PUM1,NCOA4,MYO1F,GATAD2A,DIDO1,CELF2,NAA10,RPS10,MPZL1,MLXIP,PPP2R5C,VWA8,SIAH1,PPTC7,DIS3L2,OGT,RALGPS2,WIPF2,ATL2,SEPTIN2,TUBGCP3,CDK12,ZNF431,STX7,STRBP,ABL2,COL18A1,MED14,SMARCC1,PITPNC1,ASXL2,EPC1,WDR33,OGA,MDM4,ELL,PDCD4,HIVEP2,GGA2,EIF5B,PPFIA1,TNKS,ARID1A,SIK3,CLIP1,MYL12A,CELF1,IREB2,MRPS6,OSBPL2,PPHLN1,LSM12,TRIM38,USP7,…	7.EMPP	Trisomy21vsGATA1s	3203
JOHNSTONE_PARVB_TARGETS_3_UP	6.05914	1.56329369343198e-33	8.97330580029959e-32	424	TIMP1,CYTOR,APLP2,ASAH1,S100A4,CST3,FLNA,CD9,ACTB,IQGAP1,CAPN1,CTSA,CD55,AKR1C1,KLF6,NDFIP1,TNIK,TXNIP,FLOT2,GSN,PSAP,CALM1,C17orf49,ARPC1B,FUT8,SMAD3,CITED2,SQSTM1,JAK1,WASHC2C,LGMN,NEAT1,RHOB,MYH9,MGAT4B,RNASET2,DAG1,ATP6V0C,ELOVL6,C19orf33,C15orf39,ATXN7,THBS1,OSBPL3,DAAM1,KLF10,ACSL5,TTC7B,ECE1,POLD4,HLA-B,CTNND1,PLD1,GRN,TCIRG1,PAK2,HSD17B4,STAT6,PYGL,EIF4G1,F11R,EHD1,CD58,PLD3,TAX1BP1,WIPF2…	6.EryMeg	Trisomy21vsGATA1s	3068
MITSIADES_RESPONSE_TO_APLIDIN_UP	6.05521	7.26717967398607e-37	3.92638345284349e-35	420	TIMP1,TESC,FOSB,TNFSF9,SLC2A3,BACH1,DNAJB6,HERPUD1,NFKBIA,RHOB,SQSTM1,KLF6,GADD45B,KLF2,GNAS,DUSP1,TSC22D3,LDLRAD4,USP20,JAK1,ATP6V0E1,YES1,KDM6B,SMAD3,MIR22HG,POLR2A,PIP5K1B,CD84,FBXO34,FOSL1,DUSP2,MORC3,IRF7,NR4A3,BEX4,ICAM1,MAFF,MKRN1,CTSS,STK17B,IRF1,MYLIP,MBTPS1,MCL1,JARID2,PPP1R15A,PDE3B,SUSD6,CTSB,SRSF5,IFRD1,PDE4A,GAD1,STAP1,EZR,EIF1,RBM4,BTG3,AKAP8L,PLEKHM1,STX5,TUT7,PLSCR1,SNRK,DMTF1,ST…	5.EryP	NormalvsGATA1s	3603
DACOSTA_UV_RESPONSE_VIA_ERCC3_DN	6.04737	4.85376625439993e-45	3.93366099921803e-43	844	PDLIM5,DLC1,MEIS2,IL1RAP,RHOBTB3,DNAJB6,VCL,KIFAP3,FAM171A1,STK24,KLF6,KLF10,ELL2,SON,DUSP1,STAM,ZNF804A,ZMIZ1,TFPI,SERPINE1,BMP2K,SMAD3,TMEM131L,MACF1,SP100,AGAP1,ATP2B1,SGMS1,RABGAP1L,ZMYND8,MTCL1,RALA,LYN,ZFP36L2,JUN,STK10,MBOAT2,FNBP1L,ITSN1,DDX17,KLF7,ARHGEF7,TGFBR2,MALT1,E2F3,TAOK3,MAP2K1,SEC14L1,ARHGAP12,PTPRA,ZFYVE16,SYNE2,TDG,AKAP13,DOP1B,GSE1,NFYC,OSBPL8,SKAP2,AP3B1,SEMA3C,NFKB1,PTPN12,…	5.EryP	NormalvsGATA1s	3602
REACTOME_EUKARYOTIC_TRANSLATION_INITIATION	6.04563	8.33139360756433e-28	3.30685420742793e-26	120	RPS4X,RPS26,RPL7A,RPLP0,RPS3,EIF4A1,RPL10,RPL19,RPL28,RPL12,RPS14,RPL18A,RPL6,RPL8,RPL29,PABPC1,EIF3K,RPS5,RPL18,EIF3F,EIF3G,RPL11,RPS15,RPSA,RPL41,RPS12,RPL36AL,EIF3I,RPS2,EIF1AX,EIF3L,RPS7,RPLP1,EIF5,RPL35A,RPL30,RPL3,RPS8,RPL32,RPL5,EIF3D,EIF4H,RPL22L1,RPS27A,RPS28,RPS13,RPL36,RPL10A,RPL13,EIF4G1,RPL15,FAU,RPS24,RPS9,EIF2B5,RPS3A,RPS19,EIF3M,EIF5B,EIF2B2	6.EryMeg	NormalvsTrisomy21	3014
WAKABAYASHI_ADIPOGENESIS_PPARG_BOUND_8D	6.04266	1.4248044505732e-37	1.20800750065075e-35	630	MEIS2,RABGAP1L,GNAQ,SGMS1,LIMS1,ROCK2,DNAJB6,PRKAR2B,USP15,FNBP1L,CITED2,OSBPL3,ARHGEF7,SCAF4,CD164,TSPAN14,ANGPT1,BCAS3,ARHGAP18,NCOR1,APOBR,SYAP1,NUMB,ABHD2,VCP,GRTP1,IGFBP7,DCBLD2,TOP1,MAP2K1,PTS,THOC1,AHNAK,RARS2,TXNRD1,WDR41,GNAS,WWP2,ATE1,SOS1,IBTK,USP48,DYRK1A,RAD51B,CCM2,USP14,TMBIM6,CYB5R3,HSD17B4,FAF1,UBAP2,DUSP22,FBH1,CALM1,MRPS6,EML4,ATP6V1A,ACTN4,PICALM,GRB2,CORO1B,SLC5A3,KRI1,PRKAR1…	7.EMPP	NormalvsGATA1s	3085
GAZDA_DIAMOND_BLACKFAN_ANEMIA_ERYTHROID_DN	6.04228	4.96451952352891e-36	2.43620731092119e-34	436	MAX,PTH2R,ACTR2,PSAP,SMAD3,INF2,ANK1,RHOB,SEPTIN6,TAX1BP1,CDC42,PPP1R12A,CDKN1C,NCKAP1L,RAPGEF2,RBM25,CAPZB,RSRC1,NCOR1,OBSL1,SKAP2,SECISBP2L,MAP4,AOAH,MAPKAPK2,RDX,ATG5,TCF3,LGALS1,NOCT,SENP2,ARNT,MYO9B,GSN,MAGT1,PAFAH1B2,DCTN4,MRPL23,C6orf62,PLEKHM1,HPS4,OSTF1,ST3GAL2,DDIT3,CDV3,ECPAS,PDXK,MID1,SRPK2,LPIN2,RBMS1,WNK1,TBC1D9B,MXD1,SSBP2,DCLRE1C,ZNF394,GBF1,RC3H2,LONP2,MED14,FAM30A,SUPT6H,MYLIP,B…	5.EryP	Trisomy21vsGATA1s	3647
LINSLEY_MIR16_TARGETS	6.03902	3.43903675266883e-31	1.80718959495879e-29	202	RNH1,RHOC,MACF1,UBAC1,UBE2Q1,DNAJB6,USP15,EFCAB14,DCP2,M6PR,SERPINE1,TMEM9B,PCMT1,MKRN1,AREL1,PPP1R11,PLEKHM1,PIP4K2A,FBXW7,WWP1,MFN2,MAP4,PON2,UBE2V1,DYNC1LI2,PURA,TACC1,MAPK1,NAPEPLD,TMEM245,CRY2,LYPLA2,ZFP91,LCOR,CDC37L1,ANKFY1,TVP23B,MAP3K2,HIF1AN,MRPL43,SUSD6,DAZAP2,SETD3,CDC42SE2,CACUL1,NCKIPSD,FASTK,CDS2,ATG16L1,ATG9A,PHF19,UHMK1,TMEM109,PIP4P1,SFXN5,DHDDS,SLC9A1,ELL,GOLGA1,ATL3,SLC39A7,SD…	6.EryMeg	Trisomy21vsGATA1s	3067
SENESE_HDAC1_TARGETS_UP	6.03856	4.90743952241439e-34	2.92954509730049e-32	433	KYNU,MAX,ABCC4,IQGAP1,YWHAZ,ACTR2,CD55,AKR1C1,MAST4,BACH1,CA2,LNCAROD,SLC43A3,ZMAT3,ITGA6,PTBP3,SQSTM1,NEAT1,TMOD3,TMEM41A,TFPI,CTNNA1,CPEB4,STRN,G3BP2,PTPN12,FCHO2,DCP2,SNAP23,CCND2,HECTD1,ZBTB38,PDE4DIP,IGF2BP3,GSR,ATP11A,BMP2,NEDD4L,EIF4G1,RAB6A,CDV3,OGFRL1,RAB35,CHD4,RAC2,TOP1,TAOK1,MOB1A,GPCPD1,ETS1,RB1,ZNF655,PLEKHB2,PLEKHM1,PTBP1,TPP1,FKBP15,KBTBD8,RRN3,EXOC5,MBNL1,PPIF,NFE2L2,TGFBR2,GLYR1…	6.EryMeg	Trisomy21vsGATA1s	3066
LU_EZH2_TARGETS_DN	6.03837	6.1551217658377e-33	3.27980059808209e-31	387	VCL,LRBA,RUFY1,DIPK2A,SEMA3C,ELL2,PHACTR4,ATP2C1,RABGEF1,IGF2BP3,BTAF1,EIF4G2,NPL,GPC4,MAN2A1,PTPN12,CCDC91,DCP2,PICALM,BMPR2,ANKRD17,SLC39A11,ELOVL6,SDCBP,TGFBR2,RNF38,WASL,ATP2B1,SENP2,CTNNA1,PPP3CA,TRIM33,BLZF1,NPIPB4,ATP2A2,PPP2CB,CPSF6,TACC1,EZH2,VWA8,PPTC7,TMEM87A,ELF4,ASCC3,LPXN,WDFY2,DICER1,SEC24B,MIGA1,APAF1,GAD1,SPTLC1,PSMD12,SERPINH1,SEC24D,PI4KA,MYLK,MAGT1,GFPT1,GRAMD2B,ACO1,CXADR,ZFY…	7.EMPP	Trisomy21vsGATA1s	3202
WP_HEPATITIS_B_INFECTION	6.03707	6.05869121449689e-31	2.36606166329488e-29	138	TGFB1,PRKCB,SMAD3,JAK1,STAT1,YWHAZ,TAB2,PIK3CA,STAT5A,TGFBR2,PIK3CB,BRAF,FOS,HSPG2,STAT5B,NFKB1,TRAF6,EP300,CREB1,MAP2K4,NFATC1,KRAS,SOS2,CREB3L2,TICAM1,IRF7,MAP2K1,MAP2K3,PIK3R1,MAPK8,JAK3,ATF2,NFATC3,DDX3X,PTK2B,MAPK1,STAT2,TRAF3,JAK2,CREBBP,STAT6,MAP3K1,ATP6AP1,IFNAR1,APAF1,STAT3,CASP8,NRAS,GRB2,ATF6B,MAPK14,IKBKG,CXCL8,TBK1,ELK1,MAVS,JUN,ARAF,CASP9,TLR2,RAF1,SMAD2,AKT2,IRAK4,CHUK,TGFBR1,IRF3,…	5.EryP	Trisomy21vsGATA1s	3646
DAZARD_RESPONSE_TO_UV_NHEK_DN	6.036	1.19548593208207e-31	7.89338100819853e-30	297	BACH1,RABGAP1L,AUTS2,PPP1R12A,MAST4,ZMYND8,JARID2,FNBP1L,MAP3K5,MED13L,LPP,ARHGEF7,GSE1,TMEM131L,CNOT2,CDYL,CENPC,SMAD3,GCLC,MORC3,CTCF,VPS13B,NCOA3,E2F3,CREB3L2,PRKCD,EDRF1,FYN,FRYL,ELF2,CREBBP,BAZ2B,DYRK1A,ATP2B1,ZNF217,AKAP9,BIRC2,STRN,MTCL1,ZMIZ1,AFF1,TMCC1,ADORA2B,QKI,ABL1,IGF2BP3,DMTF1,FNDC3A,NCK1,CBFA2T2,SLC25A36,KLF7,SKAP2,MTM1,RCHY1,CASP8,MEGF9,DIDO1,ATF2,SCAF11,CBLB,ARID3A,WAPL,ELF1,TIP…	7.EMPP	NormalvsGATA1s	3084
REACTOME_METABOLISM_OF_LIPIDS	6.03476	7.14077420743255e-39	5.17186170751911e-37	730	CYP7B1,CD36,SGMS1,MBOAT2,PIP5K1B,RUFY1,ASAH1,SPTLC2,MED13L,PIK3CB,FADS2,MFSD2B,HACD1,NCOA1,NCOA3,NCOR1,GPD2,LTC4S,PIK3CA,OSBPL8,OSBPL3,FAR1,ACSL3,PIP4K2A,OSBPL6,PNPLA8,GPCPD1,NCOA2,MBOAT1,AGPAT3,PLD1,EP300,PTEN,PTGS1,CTSA,ELOVL6,OSBPL9,SGPP1,TXNRD1,SLC44A1,ARNT,MED13,PPP1CB,CDK19,CROT,MTMR10,ACACA,PCCA,TBXAS1,LIPH,MED21,CREBBP,AKR1C1,SUMF1,ABHD5,ST3GAL3,PIP5K1C,CHD9,MED15,PIKFYVE,CERT1,PSAP,SYNJ1…	7.EMPP	Trisomy21vsGATA1s	3201
GARGALOVIC_RESPONSE_TO_OXIDIZED_PHOSPHOLIPIDS_BLUE_UP	6.0305	4.03854451702813e-31	1.59383616679962e-29	135	RELN,DNAJB6,TNFSF9,BACH1,PNPLA8,HERPUD1,RELB,RNF24,CPEB4,CNST,MIR22HG,NFIL3,ZBTB43,SMURF1,MAP1LC3B,FOSL1,MACO1,ATF3,AKIRIN2,SLC19A2,VPS37A,FRS2,RBM33,KANSL1L,STK17A,CREBBP,RYBP,DDIT3,PCYT1A,KBTBD8,MAFG,KIF1B,TRIB1,GNA13,MXD1,IFRD1,EIF5,PCF11,ZNF394,PHF1,ZC3H12C,SERTAD1,FGFR1OP2,VCPIP1,CXCL8,RBBP6,RORA,WDR20,SESN2,CWC25,ZFAND2A,HSPA1A,DNAJB9,DNAJB1,GLA,PPP3CC,PLAUR,UBALD2,ZBTB21,DNAJA1,MAFK,EMP1,N…	5.EryP	Trisomy21vsGATA1s	3645
JIANG_MELANOMA_TRM8_CD4	6.03026	2.29899926653147e-33	1.61819184222559e-31	423	LAT,SLC2A3,IL2RG,SPN,ZFP36L1,NR4A2,FYB1,FOSB,S100A11,PRMT2,ANXA1,PLP2,PIM1,TXNIP,CD4,CITED2,LCP2,ITM2A,STAT1,MT-CO1,PTPRC,HCST,MT-ATP6,S100A10,RSRP1,SRSF7,MYH9,NDFIP1,SYTL3,CCND3,GNG2,APBB1IP,MBNL1,DNAJA1,DDX3X,CDC37,ZC3HAV1,YWHAZ,SELPLG,YPEL5,GADD45B,ADGRE5,AHNAK,CDC42SE2,NR4A1,OSTF1,PIK3R1,TSC22D3,TMSB4X,MALAT1,ODF2L,ERN1,ANXA2,MT-ND4L,CALM1,EML4,SDCBP,RCAN3,ZFP36,CORO1B,MYL12A,HLA-B,TRAF3IP3,R…	7.EMPP	NormalvsGATA1s	3083
BENPORATH_SOX2_TARGETS	6.02928	2.0682508546044e-39	1.54291513753488e-37	717	MTSS1,SGMS1,JARID2,DHRS3,NBAS,ZFP36L1,CDC42BPA,SMAD3,CDYL,AP3B1,RNF24,IGF2BP3,EIF4G2,DDX17,UBR1,SCAF4,AUH,STXBP2,SLC7A5,ZEB2,NUDT4,HSP90B1,GNPTAB,JPT1,RIPK1,TRIM24,E2F3,USP25,TXNRD1,PUM1,SUSD6,SLC44A1,DNM2,TNRC6A,NUFIP2,SENP2,HUWE1,TMEM245,RAB3GAP2,FBXO11,DIDO1,POU2F1,PPM1B,KIF20B,PIP5K1C,ARIH1,ARFGEF1,ARID1B,DPH6,RIF1,SGK3,PPP2R5C,ZNF217,RRN3,SPAG9,OGT,GSK3B,GXYLT1,HNRNPA2B1,MYO9A,ECPAS,SSBP3,GG…	7.EMPP	Trisomy21vsGATA1s	3200
REACTOME_METABOLISM_OF_RNA	6.02803	2.61370909534021e-39	1.9305217674493e-37	714	ZFP36L1,U2AF1,IGF2BP1,YWHAZ,SMG1,CTNNBL1,IGF2BP3,HBS1L,DCP2,CNOT2,PSMD1,POLR2A,RBM25,RNGTT,TUT7,PSME4,WDR70,SRRM2,CDKAL1,PRKCD,RANBP2,PAN3,MNAT1,MTREX,DHX9,CPSF6,RPS10,PARN,RPS4Y1,SMG6,PPP2R2A,HNRNPA2B1,ADAT2,UPF2,RIOK3,AQR,RBM39,CNOT4,ADAR,EIF4G1,ACIN1,NUP93,GSPT1,TP53RK,THADA,THOC1,TUT4,ADARB1,NUP214,SMG7,PSMD14,HEATR1,GTF2F2,UPF1,PPIL2,MAPK14,WDR33,SRSF11,CWF19L2,PSMD12,FIP1L1,NUP153,TFIP11,TY…	7.EMPP	Trisomy21vsGATA1s	3199
MULLIGHAN_MLL_SIGNATURE_2_UP	6.02501	4.09743128723972e-33	2.23115601480353e-31	412	KYNU,FLNA,APOC2,MBNL1,IQGAP1,GLG1,CLASP2,TRAPPC10,OSBPL8,ACTR2,ABHD2,LNPEP,NIPBL,CYBA,CTSA,UGGT1,PLEKHB2,MYO1F,SLC16A3,APOBR,PSEN1,GRB2,RAB6A,S100A6,PRKCD,EHBP1L1,CCND3,SYK,TGOLN2,TNPO3,KPNA1,GLYR1,ATP6V0E1,MFN2,GSK3B,ELF4,BCAP29,PCYT1A,FAM53B,OAZ1,LAMP2,PLA2G4A,ADARB1,TBCD,AKAP9,APBB1IP,CHD3,DHRS7B,UPF1,C11orf21,MLLT10,KLC1,ABHD17A,S100A4,P4HB,SELPLG,LCP1,GIT2,PITPNA,TRIM38,SCPEP1,ABCA7,HSPA1A,F…	7.EMPP	Trisomy21vsGATA1s	3198
REACTOME_CELLULAR_RESPONSES_TO_STIMULI	6.02324	8.8847239556627e-35	4.83925621585074e-33	750	RPS4X,RPS26,RPL7A,RPL12,RPS3,RPS14,RPL18A,RPL10,RPLP0,RPL19,EEF1A1,SOD1,RPL6,HSPA8,RPL28,TUBA1C,RPL29,RPL8,TKT,SERP1,GSTP1,RPS5,RPS2,RPL18,ETS2,AREG,NCF4,IGFBP7,RPS12,RPL11,LAMTOR1,MYC,CCS,RPS15,PHB2,RPL22L1,RPL41,RPS28,RPS7,RPL3,RPL13,RPSA,TUBA1B,PGD,FKBP4,RPL32,RPL30,TXN2,CDK4,RPL5,RPLP1,TXNIP,HMGA1,TUBB4B,TALDO1,RPS8,STOML2,PSMF1,HSF1,MT-CO2,HSP90AB1,CITED2,FOS,RPL36AL,RPL35A,UBE2S,MYDGF,KEAP1…	5.EryP	NormalvsTrisomy21	2848
FEVR_CTNNB1_TARGETS_UP	6.02225	2.62761989207048e-40	1.59344851828892e-38	656	GP1BB,GPC4,ATP2A3,OSBPL6,LTC4S,AGPAT3,LMNA,NDFIP1,STAT1,CSRNP1,SMG1,PIP5K1B,TGOLN2,RELB,MIDN,RAB2A,ABHD2,GADD45B,RNF19A,HIF1A,F11R,ARIH1,SEC14L1,ERP44,GABBR1,SLC22A23,STK17B,SOSTDC1,ELOVL6,EIF2AK1,FOS,AGPAT4,MCL1,KLF7,SUSD6,PSTPIP2,STK10,HEPACAM2,PRKAR1A,CHD2,SECISBP2L,EIF2AK3,MAP4,RAB6A,SPTA1,MAPK6,ATF3,SYNE2,SERPINH1,TFIP11,CORO1C,GGA1,PLEKHG1,SLC26A3,ZNF652,IRF7,DUSP1,PER1,GABARAPL1,LGALS1,RAB…	5.EryP	Trisomy21vsGATA1s	3644
OSWALD_HEMATOPOIETIC_STEM_CELL_IN_COLLAGEN_GEL_DN	6.0213	2.32345654564768e-31	1.1478798563266e-29	263	LDLRAD4,ARMC8,SLC2A3,MED13L,IL2RG,ATP9B,NFAT5,ACTR2,AGFG1,DDX17,RSRP1,TXNIP,TMOD3,MEF2A,BMPR2,RBM25,ZNF292,ANKRD11,SLC16A3,CD9,CDKAL1,RAB3GAP2,RASGRP3,SOS2,PCM1,POU2F1,NLK,ATP2A3,EFCAB14,RLF,BNIP3,MAP3K2,RRN3,CR1,PRRC2C,ARMH3,ANKRD12,RIOK3,SPEN,TBL1XR1,KANSL1L,PAK2,GYPA,SMG7,MINDY3,WDR33,UBE2W,ZNF609,ELL,BRWD1,P4HA1,MAP3K1,PGGT1B,ZFR,MMRN1,UGCG,MAP4K5,CASP8,THBS1,BACE2,CCDC88C,UBE2D1,HSPA1A,ZBTB1…	7.EMPP	Trisomy21vsGATA1s	3197
DAZARD_UV_RESPONSE_CLUSTER_G6	6.02112	2.03769207899898e-29	8.83789704030954e-28	142	AUTS2,RABGAP1L,JARID2,PPP1R12A,MAP3K5,ZMYND8,MAST4,SMAD3,CDYL,VPS13B,FNBP1L,IGF2BP3,ARHGEF7,ATF2,QKI,STRN,PHLPP1,CENPC,CNOT2,USP24,FRYL,CREB3L2,FYN,ATP2B1,CLASP1,CTBP2,TLK2,FNDC3A,EDRF1,CHD9,PIKFYVE,SHOC2,ZNF451,ATP13A3,SLC25A36,SMC5,SUCO,CNOT4,TUBGCP3,KLF7,TUT4,PIK3C3,SP3,UBR5,MTCL1,REV3L,PAFAH1B1,KIF2A,PHIP,ZMIZ1,BBX,SMC4,CASP8,XPO1,ABL1,WAPL,POLE2,PIP4K2B,ZNF638,RBPJ,TLK1,APPBP2,KAT6B,MECP2,RN…	7.EMPP	Trisomy21vsGATA1s	3196
WAKABAYASHI_ADIPOGENESIS_PPARG_RXRA_BOUND_8D	6.0206	3.59235125320863e-45	2.9433594443872e-43	830	DLC1,ASAH1,PTTG1IP,TXNIP,GNAI2,PFKL,BSG,LUZP1,PTPN6,CST3,HSPA5,LTC4S,ANXA1,STAT5A,CD151,TALDO1,NID1,STAT1,ATP6V0C,PNPLA2,ABCC4,LMNA,RPN1,PIM3,ADIPOR2,ESYT1,SERPINE1,TUBB4B,KDM6B,BMP2K,HSP90B1,STAT6,EHBP1L1,ARMC8,PBX2,BNIP3L,PRNP,MBD6,NET1,YPEL5,KLF11,ZMYND8,CRYZL1,ITSN1,TST,SLC19A2,CMPK1,ACADVL,RNPEP,N4BP3,CREB3L2,MGAT4B,RGS19,VPS26C,TNIP1,ZBTB38,GSN,LNPEP,LMBRD1,ACSL3,AGPAT2,REEP5,PTBP1,RRP1B,RT…	5.EryP	NormalvsGATA1s	3601
ROSS_AML_OF_FAB_M7_TYPE	6.02047	7.95113207817616e-31	4.17210458552751e-29	69	RHAG,LAT,GP1BB,PDLIM5,GATA1,ITGA2B,DLC1,DNM3,ANK1,MRPS12,CD164,PTGS1,ARMC8,UROD,GJA4,KEL,CAVIN2,FADS2,PROS1,PDCD10,PSMD6,GP1BA,ZMYND8,SERPINI1,SOD1,HIGD1A,ABCC4,CMAS,ICAM4,PCDH9,TNIK,BMP2K,DRAP1,TPM1,NET1,SLC39A4,PCCB,NEO1,TFR2,TEK,TAL1,PRUNE1,ALDH1A1,MYL4,CTNNBL1,GATA2,RDX	6.EryMeg	NormalvsGATA1s	3161
REACTOME_INTRA_GOLGI_AND_RETROGRADE_GOLGI_TO_ER_TRAFFIC	6.01882	2.76320826111408e-31	1.10218023634492e-29	199	RHOBTB3,AGPAT3,KIFAP3,TGOLN2,TUBA1C,ARF3,RAB1A,USP6NL,CAPZB,NBAS,TMED7,VTI1A,NAPA,RIC1,RAB6A,CAPZA1,CUX1,COPA,DCTN1,COG5,MAN1A2,STX5,PAFAH1B2,ARF4,KLC1,KIF5B,DCTN4,PAFAH1B1,TUBA1A,RAB3GAP2,ARF1,RAB6B,DYNC1LI2,RAB18,SURF4,KIF1B,DYNC1I2,TUBB2A,ARFGAP1,STX16,NAPG,TMED9,TUBB4B,VPS53,MAN2A2,GOLIM4,GOLGA4,RAB3GAP1,RAB1B,NSF,GBF1,DYNC1H1,ACTR1A,ARFGAP3,PLIN3,KIF13B,MAN1A1,TMF1,CAPZA2,ARFGAP2,BICD2,NAA35…	5.EryP	Trisomy21vsGATA1s	3643
REACTOME_CELLULAR_RESPONSE_TO_STARVATION	6.01852	2.85689578189898e-28	1.11032064190261e-26	156	RPS4X,RPS26,RPL7A,RPL12,RPS3,RPS14,RPL18A,RPL10,RPLP0,RPL19,RPL6,RPL28,RPL29,RPL8,RPS5,RPS2,RPL18,RPS12,RPL11,LAMTOR1,RPS15,RPL22L1,RPL41,RPS28,RPS7,RPL3,RPL13,RPSA,RPL32,RPL30,RPL5,RPLP1,RPS8,RPL36AL,RPL35A,RPL36,ATP6V0C,ATP6V0E1,RPS13,RPS24,RPS3A,RPS27A,FAU,ATP6V1G1,RPL10A,MLST8,RPL24,RPS15A,RPS21,RPS19,ATP6V0B,LAMTOR4,IMPACT,RPS9,SEC13,RPL26,ATF4,NPRL3,RPS23,RPL22,RPL34,EIF2S2,RPL15,ATP6V1F,RR…	5.EryP	NormalvsTrisomy21	2847
GINESTIER_BREAST_CANCER_20Q13_AMPLIFICATION_DN	6.01305	7.62635186795584e-30	2.77487602844305e-28	179	CYBA,TLN1,CDC42SE1,CCNL1,BTAF1,PHACTR4,LIMD2,ITSN2,TRA2A,FURIN,CHD2,AKAP13,EHBP1L1,DNM2,MLXIP,ATXN7,LENG8,MYO9B,PLXND1,TNIP1,PUM1,MON2,PABPN1,GRIPAP1,DOCK7,PRRC2A,SLC15A4,DENND11,GRAMD4,ANKLE2,WDTC1,EIF4G1,NUP214,ARHGAP17,AGO4,BRD2,TAPBP,MADD,CNTRL,TRRAP,PARP6,KHDC4,RAB35,RUBCN,EXOC3,RBM26,PPHLN1,TCIRG1,FUBP1,KDM4A,ZMIZ2,GTPBP2,PSPC1,TMC6,SMC4,CCDC93,ENGASE,LINC01004,PROSER1,BTN2A1,TNFAIP2,SBNO2,…	5.EryP	Trisomy21vsGATA1s	3642
MARTORIATI_MDM4_TARGETS_FETAL_LIVER_DN	6.01242	8.78240349677707e-35	6.48767450390631e-33	512	RHAG,VCL,ELL2,CA2,ROCK2,EPHA3,PRKAR2B,PIM1,RAB10,LPP,FADS2,ANGPT1,ACTR2,USP16,SMAD3,DDX17,PSAP,SLC44A1,PPP6R1,NUDT4,GNG2,EIF4G1,TENT5C,SON,CTSC,DDX3X,ARNT,HP1BP3,PJA2,NFATC3,WDR26,AGPS,THRAP3,TNPO3,AP1G1,MMP14,PCYT1A,RBM25,PIK3R1,USP48,ATP2B1,ARF3,TFRC,RNF38,NORAD,RELN,YTHDF3,LASP1,FAF1,NFYC,UBAP2,SPIN1,STK3,ATF7IP,PRKAR2A,MAPRE1,QKI,GRAMD2B,ZKSCAN1,ACO1,GALNT1,SH3GLB1,UGCG,MEF2A,PKNOX1,POGK,CSNK…	7.EMPP	NormalvsGATA1s	3082
REACTOME_VIRAL_INFECTION_PATHWAYS	6.00971	6.27006761551621e-35	3.46572181829496e-33	801	RPS4X,RPS26,PCBP2,RPL7A,RPL12,RPS3,RPS14,SLC25A6,RPL18A,RPL10,RPLP0,IMPDH2,RPL19,EEF1A1,RPL6,HSPA8,RPL28,TUBA1C,RPL29,RPL8,RPS5,RPS2,RPL18,RPS12,RPL11,TUFM,RPS15,VPS28,TRIM28,RPL22L1,SLC25A5,RPL41,RPS28,DDOST,COMT,RPS7,RPL3,RPL13,RPSA,TUBA1B,FKBP4,RAN,RPL32,BCAP31,TGFB1,RPL30,RPL5,RPLP1,HMGA1,TUBB4B,RPS8,PSMF1,PRMT1,PTPN6,HSP90AB1,CXCR4,NPM1,CNBP,RPL36AL,RPL35A,HSPG2,KEAP1,PYCARD,RPL36,YWHAB,RPN2…	5.EryP	NormalvsTrisomy21	2846
BENPORATH_SOX2_TARGETS	6.00949	8.71849766683547e-38	6.19594567523108e-36	717	MTSS1,ZFP36L1,STXBP2,DHRS3,SGMS1,RGS10,EIF4G2,CA2,JARID2,TPM3,SMAD3,CDC42BPA,SNRPD3,VASP,NBAS,ARF3,SLC44A1,MAGED2,PRKAR1A,SNRPN,DDX17,NUDT4,NAA38,JPT1,PIP5K1C,TALDO1,UBC,C1orf174,ARHGAP1,MORF4L1,OBSL1,AUH,RTN2,GNPTAB,CDYL,TRIM24,WDR81,AP3B1,IGF2BP3,BMP2,GXYLT1,NEDD4L,PLEKHG3,SENP2,RIPK1,SLC7A5,CFL1,CAPZA2,UFD1,DNM2,HSD17B12,DPH6,UBR1,TAL1,SEPTIN6,ANP32A,BAMBI,ACOT8,ARF4,PPP1R11,HSP90B1,SSBP3,ZNF2…	6.EryMeg	Trisomy21vsGATA1s	3065
DODD_NASOPHARYNGEAL_CARCINOMA_UP	6.00934	5.0845284756343e-46	5.26954881738655e-44	1357	TYROBP,FCGR2A,FCER1G,NID1,NPL,U2AF1,AGPAT3,STAT1,ARF3,SLC44A1,DNAJB6,DCAF6,FXN,SUB1,LGALS1,UBE2F,FAM171A1,RSRC1,FBH1,YWHAH,CASP6,ADIPOR2,RBM4,SMG1,TRIM24,CCND2,SERPINE1,ATP2C1,FGFR1OP2,FRRS1,FKBP5,QKI,IL15,OTULIN,GXYLT1,ENY2,PSMA7,KHSRP,EIF3J,NNT,ANO6,SLC7A5,BCL2L11,EFNB2,GAD1,LAMP2,CKAP5,MPZL1,RECQL,NEDD4,HSP90B1,CCDC14,ZNF267,GOLT1B,F2R,PTGS2,DOCK7,MTR,GPR89B,LMBR1,ELP3,BRD4,EIF4E2,CCDC28B,GLS,…	6.EryMeg	Trisomy21vsGATA1s	3064
REACTOME_TOLL_LIKE_RECEPTOR_CASCADES	6.00342	9.45926749151776e-31	3.63694207315623e-29	168	DNM3,HSP90B1,TAB2,NFKBIA,MAP3K8,UBC,MEF2C,FOS,NFKB1,TRAF6,CREB1,MAP2K4,MAPKAPK2,DNM2,TANK,USP14,MEF2A,TICAM1,IRF7,MAP2K1,MAP2K3,MAPK8,RIPK1,ATF2,NFKB2,BIRC2,UNC93B1,MAPK1,TRAF3,FBXW11,MAP3K1,CTSS,PLCG2,CASP8,MAPKAPK3,PTPN11,SLC15A4,PPP2CB,PIK3R4,MAPK14,IKBKG,ALPK1,N4BP1,TBK1,PPP2CA,UBE2D1,TNIP2,CTSB,NKIRAS1,ELK1,JUN,BIRC3,UBE2D3,PELI1,BTRC,TLR2,VRK3,SIGIRR,PTPN4,NLRC5,PIK3C3,ITGAM,IRAK4,BTK,DUSP3…	5.EryP	Trisomy21vsGATA1s	3641
MARTINEZ_RESPONSE_TO_TRABECTEDIN_DN	5.99593	1.30285135581028e-30	8.23777454720384e-29	265	CDC42BPA,LUZP1,ZMYND8,RCOR1,TP53INP1,RAB2A,ACSL3,NET1,TSPAN14,TRIM24,EPB41,ATG5,ELOVL6,RIPK1,BTAF1,SON,BLZF1,TOP1,FYN,FRYL,SRRM2,PJA2,USP8,TXNRD1,ITPRID2,THRAP3,TDG,STK17A,RBM25,SQSTM1,SIRT1,BIRC2,MTCL1,BCL2L1,FAF1,SPIN1,EML4,TBK1,ARFGEF2,EP400,ARFGAP1,GTF2B,PSMD14,RAB6A,FNDC3A,STK17B,JAG1,LRRC8C,FOSL1,PANX1,YWHAE,CDC5L,CORO1C,PRKACB,SRPK2,FBXL3,UBN1,BIRC6,CSNK2A1,RNF14,NBN,CFLAR,SLC2A1,HSPA8,CDK…	7.EMPP	NormalvsGATA1s	3081
KIM_WT1_TARGETS_DN	5.99511	5.34627231865425e-33	2.99954015351865e-31	454	DLC1,ASAH1,SPN,ITGB1,SGMS1,ACTR2,STAM,HSPA5,ZMYND8,SERF2,CITED2,RSRP1,DNAJB6,NEAT1,SEMA3C,NET1,ELOVL6,ARL4A,DAAM1,SDF2L1,CDK2AP2,POLD4,GADD45B,SLC5A3,TBPL1,PDE4DIP,WIPI1,IGF2BP3,DRAP1,SLC33A1,RAB6A,DENND4C,RAP2B,NCOA2,APAF1,RMDN1,TST,NFATC3,TMEM165,AGAP1,GLS,ABCD3,THOC7,ELOVL1,MED21,DERL2,KLHL2,BCL2L1,DLEU1,SOAT1,RWDD3,STIP1,HSPA1A,NBR1,PPP2R5C,SOD2,CPOX,MAGT1,GTF2H5,CKAP2,SGK3,DNAJB4,USP33,UPF3A…	6.EryMeg	Trisomy21vsGATA1s	3063
SPIELMAN_LYMPHOBLAST_EUROPEAN_VS_ASIAN_UP	5.99428	7.41500265488845e-28	4.85357454480506e-26	476	HMGN1,ACTG1,ARHGDIB,ICAM3,SRGN,CYB5R3,APRT,RPL19,CEBPB,MBOAT7,AKR1A1,PEBP1,MAP2K2,AHCY,CSTB,DDX3X,MARCKSL1,PGLS,ARF5,PKN1,NPM1,MYL6,S100A11,B2M,ATP5MC2,PTPN6,SMARCD2,MYL6B,UQCRC1,NARF,ADA,UCP2,ENSA,TXN2,DPF2,CCDC85B,RRP7A,ATP5PF,SF3A2,AP1B1,HNRNPL,CSNK1E,ERH,RRP1,HMGB3,SNRNP200,PSMB5,MAP4K2,ATP5F1D,RPS7,TADA3,PMF1,SCAND1,AUP1,TUBB,SERTAD3,SMARCA4,CD2BP2,HMGB1,PPAN,ADGRE5,HEBP2,RAB1B,DBI,PQBP1,SER…	7.EMPP	NormalvsTrisomy21	2751
HALLMARK_OXIDATIVE_PHOSPHORYLATION	5.99417	8.9342165234662e-28	3.4904253245081e-26	200	ATP5PO,SLC25A6,SLC25A5,CYB5R3,ATP5F1B,OXA1L,PHB2,ATP5PF,ATP5MC2,SLC25A3,ECH1,ATP5F1A,BCKDHA,UQCRC1,MDH2,ATP6V1G1,NDUFS2,SDHC,ACAA1,ATP6V0E1,TOMM22,NDUFB8,FDX1,ATP5F1D,LDHA,NDUFC1,PRDX3,VDAC1,IDH2,NDUFAB1,NDUFV1,ATP6V0C,HADHB,LDHB,ATP5PB,GLUD1,DECR1,MGST3,ETFA,SDHD,COX5A,ATP5F1C,ECHS1,CYC1,NDUFS3,NDUFB3,GPI,ATP6AP1,PMPCA,NDUFB5,MRPL34,PDHB,FH,HTRA2,HSD17B10,ATP6V0B,TIMM10,TCIRG1,MDH1,MRPS12,IDH3B,…	6.EryMeg	NormalvsTrisomy21	3013
LEE_DIFFERENTIATING_T_LYMPHOCYTE	5.99226	5.04797202729591e-31	1.98172754482106e-29	195	LAT,ITM2A,PTPRC,CELF2,PRKCB,FYB1,EPB41,SEPTIN6,TXNIP,CCND3,RNASET2,NCKAP1L,FKBP5,SRRM2,TMEM131L,DOCK2,LAPTM5,LNPEP,AKAP13,PRKCQ,APBB1IP,MYCBP2,ARHGAP15,CDK13,MDM4,RBM33,USF3,RGCC,ZNF148,SEMA4D,KLF13,RYBP,AP1G2,CNOT6L,CEP350,SP110,STX16,TMBIM4,EVI2B,ZNF207,ATF7IP2,DCLRE1C,LPXN,CBX4,HCLS1,FLI1,BTG2,RASSF5,UBASH3A,BRD2,BCL2L11,GPR174,DICER1,ING3,ZNF160,TRAF3IP3,PDE7A,AKNA,PSMA3-AS1,CD53,SNX20,KMT2E,…	5.EryP	Trisomy21vsGATA1s	3640
SPIELMAN_LYMPHOBLAST_EUROPEAN_VS_ASIAN_DN	5.99175	1.0246966726969e-40	6.64359860141573e-39	584	PDLIM5,ASAH1,CD63,CD164,PSAP,KIFAP3,ACTR2,RHOB,SQSTM1,KLF6,KLF10,SON,JAK1,MEF2C,ANXA11,ATP6V0E1,ITM2B,NAPA,SUMO3,NFIL3,DOK2,PTBP3,GLG1,SNX3,MCM3AP,WASF2,PIP5K1B,XPNPEP1,ILK,CYB5R4,EIF5,USP16,TFG,TAX1BP1,HSPA8,RAC2,ARHGEF7,SLC16A3,DDOST,SYK,TMBIM6,MAP2K1,ARPC5,PTPRC,DAZAP2,ANXA2,SEL1L,CMPK1,TTC3,MKRN1,ATG5,MED21,SKAP2,AP3B1,CTSS,NFKB1,PTPN12,TGOLN2,PABPN1,VPS26C,MYLIP,PDCD10,ARAF,BTG2,BIRC2,MCL1,R…	5.EryP	NormalvsGATA1s	3600
YAGI_AML_FAB_MARKERS	5.99113	7.8841976099202e-31	3.06292864439556e-29	193	MYO16,RHAG,GP9,GP1BB,DLC1,ITGA2B,MAX,VCL,ZBTB16,NR4A2,IL2RG,CD164,AKR1C1,LDLRAD4,LAMA5,CTSW,KEL,TRPC6,ELL2,TFDP2,CFP,ADAMTS3,CFH,SNTA1,AHNAK,PDCD10,PIR,PIM2,ELOVL6,CD68,S100A10,ITSN2,TXNRD1,GABRE,TPST2,NET1,AP1S2,FAM20B,MED21,ZMYND8,AOAH,SERPINH1,RYR3,ANXA5,RUNX1T1,GJA4,LGALS1,NCAM1,USP8,ULK2,IFNGR1,CDC42BPA,GAD1,CLCN4,SERPINI1,DLEU1,PROS1,MORF4L2,GP1BA,ACO1,GIT2,TBPL1,ANKLE2,ANXA2,NR4A3,MAN1A1,B…	5.EryP	Trisomy21vsGATA1s	3639
BLALOCK_ALZHEIMERS_DISEASE_DN	5.99086	1.86556955632636e-49	1.52915201325696e-47	1223	HERC2,APLP2,ASAH1,PTH2R,HSPA5,ABCC4,STAM,STK24,ACTN1,ACTR2,PRKCB,B2M,PDE4DIP,BSG,HLA-B,YPEL5,NDFIP1,KIFAP3,LRP12,ATP2C1,STAT1,ITM2B,CLIC2,YWHAZ,PTGER4,SEPTIN6,ARPC2,PIP5K1B,RCOR1,CDC42,RANBP9,PTEN,GNAS,CCNL1,RAB2A,GLS,ATP2B1,BNIP3L,UBC,NUMB,PPP1R12A,GABBR1,MAP4K3,VMP1,MEG3,MEF2C,CLTC,MPP1,RNASET2,G3BP2,EIF2AK1,FCER1G,ARF3,VCP,CAB39,CLASP2,ZMAT3,ITSN2,NPEPPS,PIAS1,TOX,CRYM,TMBIM6,ELMO1,ARPC3,ATP6V…	5.EryP	Trisomy21vsGATA1s	3638
REACTOME_TRANSPORT_TO_THE_GOLGI_AND_SUBSEQUENT_MODIFICATION	5.983	6.95661365492814e-30	3.43776497305124e-28	181	ANK1,TUBA1C,CD55,TRAPPC1,SPTA1,CAPZB,TUBB1,FUT8,CTSZ,ARF3,FUCA1,MGAT4B,PPP6R1,TRAPPC10,SPTB,TUBB2A,NAPA,COPE,DYNC1I2,RAB1B,CAPZA1,CAPZA2,TUBB4B,TFG,TMED7,STX5,ARF4,GOLGB1,DCTN1,B4GALT1,PPP6R3,MAN2A1,SCFD1,DYNC1I1,DYNC1LI2,CTSC,MGAT3,COG4,DCTN2,NSF,TRAPPC2,ARFGAP1,GBF1,ARCN1,LMAN2,TRAPPC3,TMED9,TRAPPC6B,GORASP1,ARF1,PREB,TBC1D20,TRAPPC5,DCTN5,COPA,NAPG,STX17,TUBAL3,RAB1A,BET1L,ARFGAP2,SEC22A,B4GAL…	6.EryMeg	Trisomy21vsGATA1s	3062
REACTOME_NEUTROPHIL_DEGRANULATION	5.98263	1.1085147142135e-33	7.87678884071136e-32	465	LRRC7,SLC2A3,VCL,ARMC8,CD36,ASAH1,CD55,TYROBP,S100A11,CTSA,FCGR2A,RAB10,DNAJC3,CST3,PFKL,IQGAP1,CYBA,PTPRC,TSPAN14,UBR4,ACTR2,PLD1,NBEAL2,VCP,PSEN1,BIN2,PSAP,CMTM6,LYZ,CAPN1,CTSZ,CTSC,B4GALT1,DDX3X,CD68,PECAM1,GSN,TUBB4B,PRKCD,TMBIM1,YPEL5,FCER1G,CTSH,TRAPPC1,ADGRE5,CD63,STK10,NCKAP1L,ATP11A,CR1,OSTF1,FUCA1,CFP,MAN2B1,TCIRG1,CDK13,ANXA2,CAP1,CD58,PYGL,CYB5R3,HUWE1,SDCBP,GRN,PSMD1,LAMTOR1,ROCK1,RA…	7.EMPP	NormalvsGATA1s	3080
BRUINS_UVC_RESPONSE_LATE	5.98096	9.9153473791299e-45	8.91186643955531e-43	1104	STXBP5,LRRFIP2,PLXDC2,RUFY1,PPP1R12A,KIFAP3,CD55,NBAS,FER,RAB10,ATXN7,PDCD10,FADS2,RSRC1,ZFAND6,TLN1,DYRK1A,RAB2A,SOS1,USP47,ARHGEF7,NID1,OSBPL3,GPC4,DCBLD2,KDM6A,MEG3,PACSIN2,CAB39,BCAS3,ITPR2,MARK3,NUDT4,BMPR2,MAP4,TANK,PTEN,SMURF1,JAK2,STK4,RSU1,B4GALT1,CMIP,CITED2,OSBPL9,TGFBR2,RNF38,PLEKHB2,CD2AP,SLC44A1,ATP2B1,CPQ,STAM2,ZNF326,GATAD2A,PPP6R3,CTBP2,UBE2K,MNAT1,ABHD5,GTF2E2,ATG7,RABEP1,CCNL2,…	7.EMPP	Trisomy21vsGATA1s	3195
REACTOME_DEUBIQUITINATION	5.97194	8.95730164585938e-31	3.46178823712255e-29	238	TGFB1,PRKN,STAM,SMAD3,USP20,PTEN,NFKBIA,HIF1A,UBC,TGFBR2,CYLD,VCP,TRAF6,EP300,SNX3,USP15,TNKS2,APC,MBD6,USP14,ATXN7,USP47,USP22,INO80D,USP9X,USP48,PSME4,USP24,OGT,RIPK1,ADRM1,SMURF2,MDM4,USP8,USP12,USP34,BIRC2,STAM2,SIAH2,USP7,TNIP1,TRAF3,TNFAIP3,PSMD1,ACTB,USP4,TNKS,USP25,USP33,VCPIP1,IKBKG,USP16,YOD1,INO80,WDR20,OTUD7B,USP42,OTUD5,TRRAP,UBE2D1,MDM2,TNIP2,BABAM2,WDR48,MAVS,BIRC3,MYSM1,UFD1,USP49…	5.EryP	Trisomy21vsGATA1s	3637
MULLIGHAN_MLL_SIGNATURE_1_UP	5.96681	1.3520183129626e-29	6.04117404271071e-28	378	IGFBP7,LGALS1,PKM,ITGB2,ENO1,ATP8B4,FES,LAT2,PSMB8,ARPC1B,SYNGR2,PECAM1,PPIF,UQCRC1,CAPG,FOSL2,RAC2,MICAL1,CXCR4,ARPC2,CYBA,SNX17,SEPHS2,ATP6V0E1,P4HB,C15orf39,NDUFB8,MALT1,ID2,LAMP1,RRP7A,LAPTM5,CTSA,IFNGR2,NDUFC1,CCND3,MFSD1,RNF167,CAT,SYK,SLA,SPI1,SELPLG,TADA3,SDF4,POLD4,SDHD,HCLS1,OAZ1,SMIM10L1,AKR7A2,GRN,IL10RB,NUBP1,CEBPA,MRPL34,PYCARD,FLNA,TOR1A,NAGPA,IRAK1,EXOSC4,MGST2,DNM2,APOBR,HSPA1A,C…	6.EryMeg	NormalvsTrisomy21	3012
ZWANG_CLASS_3_TRANSIENTLY_INDUCED_BY_EGF	5.96632	2.10020641932375e-31	8.46780523337074e-30	215	DLC1,IL1RAP,NR4A2,CD55,ZFP36L1,FOSB,ELL2,CSRNP1,CCNL1,MAP3K8,CPEB2,VMP1,FOS,EZR,MCL1,FKBP5,RAPGEF2,GSE1,KDM6B,NFKB1,TXNRD1,SERPINE1,SERTAD2,ETS2,PPTC7,TIPARP,SNRK,EIF2AK3,PPP1R15A,CEMIP2,STX11,CAVIN2,ATF3,HIVEP2,GPCPD1,ZSWIM6,BLZF1,MYADM,DUSP1,PER1,JAG1,MACC1,IGF1R,NFKB2,TFRC,AFF1,ZBTB38,MBP,BCL3,FNDC3A,KLF13,TLE3,TNFAIP3,SEMA3C,MTM1,TRIB1,RBMS1,RUNX1,PROS1,PTGS2,ARL5B,PLAC8,GALNT7,NR4A1,LATS2,ZC…	5.EryP	Trisomy21vsGATA1s	3636
BRUINS_UVC_RESPONSE_EARLY_LATE	5.96586	1.96245666208125e-30	9.09312217337028e-29	304	CD84,SPTLC2,PIK3CB,ZMYND8,CDYL,LMBRD1,OSBPL6,GPCPD1,QKI,PTPN12,NIPBL,CTDSPL,MAP4,RNF216,E2F3,ANKRD11,MAPK1,CTDP1,IGF1R,CHD2,PUM1,SRRM2,ASAP1,SS18,IFRD1,ABCD3,ARIH1,STK10,RBM6,CLN8,PTPN2,YAF2,THUMPD2,LNX2,DDHD1,SEC24B,WAC,RNF115,EPC1,STAG2,UBE2W,NCOA6,FBXW11,P2RY12,SLX4IP,FUBP1,ARID1A,APLF,KDM1A,SORBS1,VPS37B,UBE2G1,MOB4,UBN1,DENND1B,PPP2R2D,CRTC3,SMURF2,SNAP23,SMC6,UIMC1,KCMF1,HDAC9,KPNA3,ACTR8,M…	7.EMPP	Trisomy21vsGATA1s	3194
GARY_CD5_TARGETS_UP	5.96567	1.80244842854341e-32	9.8896104219051e-31	455	TGFB1,SLC2A3,IL2RG,TLN1,ZFP36L1,CD55,LRBA,MALAT1,PTPN6,TNFSF9,SESTD1,GNAI2,NBEAL2,FYN,PDK1,PIM2,STAT1,SQSTM1,PJA2,NEAT1,DDX17,MGAT4B,PPP1R18,CTNNA1,DOK3,CDC42,RSRC1,PFKL,SUSD3,WASF2,CAPNS1,MAP1LC3B,AUH,IRF9,NCOA3,POLD4,R3HDM2,GCHFR,ASL,STK4,SHKBP1,CAB39,TNIP2,STAT5B,PLEK,MKRN1,SDCBP,BCL2L11,MICU1,LTN1,KPNA1,SEPTIN6,MBP,TSPO,TAOK1,YWHAE,UACA,RAB11B,P4HA1,ZFAND3,CD70,TPP1,BNIP3L,SULT1A1,GBE1,KLHDC2…	6.EryMeg	Trisomy21vsGATA1s	3061
MARTORIATI_MDM4_TARGETS_FETAL_LIVER_DN	5.96468	1.71853101786467e-34	1.04257548417123e-32	512	RHAG,VCL,FADS2,PRKAR2B,ACTR2,EPHA3,ROCK2,CA2,RAB10,PSAP,ARPC1B,SMAD3,ARF3,CLIC1,LPP,SLC44A1,PJA2,HP1BP3,DDX17,NUDT4,TENT5C,PPP6R1,ARNT,MMP14,MT-ND3,TGOLN2,GNG2,ANGPT1,GPS2,QKI,WDR26,AP1G1,TRAK2,ERMAP,ELL2,EIF4G1,GRAMD2B,UFD1,OGFRL1,PKNOX1,HEXIM1,ETS1,NORAD,FAF1,RAB7A,SH3GLB1,NFATC3,ANP32E,FYTTD1,LASP1,ZFPM1,F2R,PLXNB2,AKAP10,UBAP2,RELN,PITPNB,NFYC,CHP1,EXOC5,KAT2B,UGCG,ACO1,GLYR1,MARK2,PRKAR2A,CT…	6.EryMeg	Trisomy21vsGATA1s	3060
ENK_UV_RESPONSE_KERATINOCYTE_UP	5.96247	8.98261335579309e-37	4.65286895978199e-35	510	KYNU,TGFB1,CYBA,NR4A2,DNAJB6,TNFSF9,CD4,B2M,STXBP2,EMP3,BSG,GSTP1,HLA-A,HLA-B,S100A11,RNH1,TAGLN2,MRPS12,ELL2,ITM2B,YWHAZ,FMNL1,SNTA1,RPS10,OAZ1,GNAS,PTGS1,GADD45B,UBE2H,RNF24,ALDOA,STK17B,MAGED2,CDKN1C,FOS,VCP,RAB1A,POLR2A,TXNRD1,RPN1,ETS2,TALDO1,MAP1LC3B,ZFP36,ATP6V0C,GRN,PPP1R15A,ATP6V0A1,STX11,ATF3,VASP,WASL,MYCN,CITED2,HMG20B,DCTN1,NECTIN2,NUCB1,DUSP1,PER1,MAP2K3,RBM4,LGALS1,IER2,PPP1CA,PFN1…	5.EryP	Trisomy21vsGATA1s	3635
WP_B_CELL_RECEPTOR_SIGNALING	5.9614	1.17390265342741e-30	4.49032814970002e-29	97	MAX,PTPRC,PRKCB,LYN,PIP5K1B,CDC42,PTPN6,NFKBIA,REL,LAT2,MEF2C,BRAF,NFKB1,TEC,SYK,CREB1,E2F3,KLF11,INPP5D,MAP2K1,GSK3B,PIK3R1,PIP5K1C,MAPK8,ATF2,NFATC3,PRKCD,MALT1,MEF2D,NCK1,MAPK1,FOXO1,PLCG2,GRB2,PTPN11,RAC1,HCLS1,BCL6,CBL,MAPK14,IKBKG,GAB2,ETS1,BCL10,ELK1,JUN,CRKL,PIP5K1A,FYN,RAF1,PTPN18,GTF2I,RAC2,BTK,CHUK,SHC1,GAB1,PIK3R2,MAP3K7,RELA,RASGRP3,AKT1,IKBKB,SH3BP2,SOS1,CARD11,VAV1,NFATC2	5.EryP	Trisomy21vsGATA1s	3634
DEURIG_T_CELL_PROLYMPHOCYTIC_LEUKEMIA_DN	5.96087	3.10969773521537e-31	1.51623170618998e-29	318	RABGAP1L,PPP1R12A,CD84,MAP3K5,PTPRC,PRKCB,TNIK,LUZP1,NCOA1,TPST2,GALNT10,USP47,TRAPPC10,PJA2,HBS1L,ACSL3,MAN2A1,LCP2,CTSW,DNAJB6,USP48,TIPARP,TES,ZNF292,RNF19A,PSME4,KLHL2,TGFBR2,FYN,EML4,REEP5,RTN4,RDX,PCM1,KDM2A,STK17A,EPS15,B3GNT2,CCL5,TBC1D4,SNRK,ANKRD12,ZBTB38,ILRUN,MCM9,TBK1,RAP1GAP2,THOC1,MAN1A1,CUL2,TAB2,CUL5,SLC25A37,BRAP,YME1L1,USP16,CDC42,OGA,CD58,N4BP2L2,ANXA2,GGA2,FUBP1,TFIP11,ZBTB43…	7.EMPP	Trisomy21vsGATA1s	3193
CASORELLI_ACUTE_PROMYELOCYTIC_LEUKEMIA_DN	5.95862	3.17915240233312e-38	2.25871208775286e-36	660	KYNU,DLC1,ITGA2B,ABCC4,ARHGAP6,CARMIL1,LRRFIP2,LAT,VCL,HDC,GP1BB,CD84,KIFAP3,MEF2C,PRKAR2B,CDC42BPA,SEMA3C,ROCK2,FADS2,PSTPIP2,CTNNBL1,ACTR3,FAM171A1,LMNA,PDIA3,ACTR2,PROS1,DDX3Y,ACSL3,GLUL,PDK3,NXF3,CTDSPL,PICALM,TFPI,ADIPOR2,PTGS1,RPN1,ELOVL6,DNAJC6,PLEKHB2,SLC16A3,LARP4B,KDM5D,ACACA,CLCN4,DAG1,RDX,G3BP2,AKR1C1,MTREX,DHX9,LUC7L2,EIF1AY,TPM1,RPS4Y1,SNX4,SRPK2,PIR,TBC1D4,SQSTM1,CTSZ,HNRNPA2B1,RAB…	7.EMPP	Trisomy21vsGATA1s	3192
THEILGAARD_NEUTROPHIL_AT_SKIN_WOUND_DN	5.95559	3.12358715996994e-32	1.80417425805705e-30	226	TGFB1,MEIS2,OAZ1,ACTN1,ARHGDIB,PRMT2,GNAI2,NCF4,ARPC3,NCOA4,CITED2,ARPC1B,TSC22D3,PPP1CA,GNAS,TPST2,FLOT2,STK24,IQGAP1,CAPZB,PRKCB,NFE2,EIF4G2,CDKN2D,ANXA11,CALM1,PRKAR1A,CBFA2T3,JAK1,TWF2,TADA3,ARHGAP1,SELPLG,STAT6,MAPKAPK3,MAP3K5,PLCG2,PHKB,ADGRE5,RALY,ARHGAP4,GNAQ,SNAP23,RIPK1,FLII,INPP5D,HCLS1,RGS19,ACTN4,PPP1R12A,RABIF,ARHGEF1,GNB2,TBPL1,HDAC5,PDE3B,USP15,RPS6KA1,FLI1,CORO1A,GTF2B,COX5B,LASP…	6.EryMeg	NormalvsGATA1s	3160
REACTOME_VESICLE_MEDIATED_TRANSPORT	5.94888	3.12457410756881e-41	2.08007362018152e-39	707	TUBA1C,STON2,RHOBTB3,AGPAT3,CD4,DNM3,KIFAP3,ACTR2,CD55,TRAPPC10,TRAPPC1,ARPC2,ARPC3,CALR,STAM,ARF3,HPS1,CTSZ,RAB5C,PACSIN2,PPP6R1,ANK1,NAPA,TUBB4B,HSP90B1,RABGEF1,DNM2,AP1G2,RIN3,DCTN1,TMED9,RAB8A,MYH9,CAPZB,RALA,AP1S2,TFG,FNBP1L,ITSN1,HSPA8,DENND6B,ARPC5,GJA4,YWHAH,RAB1B,SYTL1,CTSC,AP2M1,RAB11B,PLIN3,FTL,HYOU1,GGA1,UBC,PIP5K1C,AP3B1,ANKRD28,TGOLN2,HGS,SYNJ1,ACTB,VPS28,LNPEP,COPE,TMED7,FCHO2,MAN2…	5.EryP	NormalvsGATA1s	3599
REACTOME_ANTIGEN_PROCESSING_UBIQUITINATION_PROTEASOME_DEGRADATION	5.94758	1.51896903830916e-30	7.08219314111644e-29	305	HERC2,PRKN,ZBTB16,RNF182,UBR4,TRIP12,PJA2,UBR1,ITCH,LNPEP,AREL1,TPP2,FBXW7,HERC1,SMURF1,UBA6,PSMD1,UBE2E1,FBXL20,RNF19A,PSME4,NPEPPS,KLHL2,HECTD1,WWP1,HUWE1,CUL3,CBLB,FBXO11,LTN1,UBE2K,ATG7,UBE2Q1,ZNRF2,BTBD1,SIAH1,HERC4,SIAH2,RNF4,NEDD4L,UBE2Q2,FBXL4,UBE2H,CUL2,RLIM,UBAC1,CUL5,PSMD14,RNF115,UBE3C,UBE2W,MKRN1,PSMD12,FBXW11,HERC3,ANAPC10,KLHL20,FBXW2,UBE3A,UBE2G1,CDC16,UBA3,LNX1,FBXL3,SMURF2,MYLIP…	7.EMPP	Trisomy21vsGATA1s	3191
REACTOME_METABOLISM_OF_LIPIDS	5.94197	4.16737604852571e-40	2.50681112467365e-38	730	CYP7B1,ASAH1,SPTLC2,AKR1C1,MBOAT2,OSBPL6,PSAP,LTC4S,AGPAT3,RUFY1,SGMS1,MED13L,PNPLA8,CTSA,PPP1CB,MFSD2B,NCOA3,PIP5K1B,HACD1,OSBPL8,PTEN,PIK3CA,PTGS1,PIK3CB,ELOVL6,AGPAT4,ARF3,ALDH3B1,TXNRD1,MBOAT1,NCOR1,NCOA2,EP300,MED21,AKR1C2,MAPKAPK2,MTMR10,GPCPD1,NCOA1,TBL1XR1,ABCC1,INPP5D,MED13,MBTPS1,PIK3R1,GPD2,PPP1CA,PNPLA6,FAR1,ARNT,PIP5K1C,SEC24B,CERT1,FADS2,OSBPL3,PLD1,PIK3C2A,ACADVL,DDHD1,PNPLA2,ACSL3…	5.EryP	Trisomy21vsGATA1s	3633
REACTOME_NEUTROPHIL_DEGRANULATION	5.94153	1.11763047057753e-29	4.76557632654258e-28	465	EEF2,FTH1,APRT,IMPDH2,EEF1A1,PFKL,HSPA8,CCT8,GMFG,GSTP1,FABP5,ITGB2,LAMTOR1,CYB5R3,SERPINB1,DDOST,NME2,S100A11,APEH,TRAPPC1,TXNDC5,CAPN1,CSTB,TUBB4B,PTPN6,HSP90AB1,GPI,CD47,ILF2,VAT1,CTSD,PKM,PYCARD,A1BG,CTSC,CD59,ACAA1,CSNK2B,PGAM1,ATP6V0C,CYBA,TUBB,GSDMD,HLA-B,TMBIM1,CD63,DBNL,PTGES2,VAMP8,PRDX6,DYNLT1,XRCC6,MAN2B1,NAPRT,VCP,PSMD13,PECAM1,PSMD3,IMPDH1,TMEM179B,DDX3X,CAT,PSMD7,DPP7,LAMP1,RAB37,T…	5.EryP	NormalvsTrisomy21	2845
REACTOME_HEMOSTASIS	5.93848	1.72684280452562e-36	1.16087396462794e-34	634	GP9,GP1BB,LAT,GATA1,TGFB1,TIMP1,ITGA2B,HBG2,APLP2,GYPB,CTSW,CARMIL1,VCL,TMSB4X,ACTN1,FLNA,TLN1,TUBA1C,STXBP2,CD36,TRPC6,ALDOA,SPN,TAGLN2,PFN1,ABCC4,CD63,CD9,ACTB,FCER1G,ITGB1,YWHAZ,CD84,PRKAR2B,KIFAP3,HBG1,S100A10,GNAQ,WDR1,DOK2,SERPING1,GNAS,SLC16A3,PRKCB,PTPN6,PROS1,HSPA5,ATP2A3,MPL,PSAP,CALM1,CAPZB,GNAI2,RHOA,ANXA5,TUBB1,MPIG6B,LCP2,CLEC1B,GP1BA,FYN,PIK3CB,ITGB3,ITGA6,MMRN1,PRKCQ,CAP1,PRKCD,MA…	6.EryMeg	Trisomy21vsGATA1s	3059
ROSS_AML_OF_FAB_M7_TYPE	5.9363	5.14429764208592e-30	2.35438407423073e-28	69	RHAG,PDLIM5,DLC1,ITGA2B,DNM3,ABCC4,ANK1,RYR3,GATA1,ARMC8,LAT,KEL,GP1BB,BMP2K,ZMYND8,TNIK,PDCD10,FADS2,CTNNBL1,NET1,PROS1,CAVIN2,PTGS1,CD164,DNAJC6,GJA4,RDX,TEK,GP1BA,SERPINI1,TPM1,MRPS12,HIGD1A,CMAS,TAL1,RASA1,PCDH9,VPS37B,TFR2,SLC39A4,ICAM4,PRUNE1,MYL4,NEO1,PCCB,APOE,PSMD6,MYH10,UROD	7.EMPP	Trisomy21vsGATA1s	3190
FLECHNER_BIOPSY_KIDNEY_TRANSPLANT_OK_VS_DONOR_UP	5.93446	3.94961658341467e-35	2.97657467968251e-33	556	PDLIM5,ACTN1,APLP2,AUTS2,CFH,CDC42BPA,RHOBTB3,FNBP1L,MSN,PDIA3,HSPA5,CITED2,RAB2A,ACSL3,ITM2A,STAT1,BMP2K,PTPRC,CD46,ATP6V0E1,LGALS1,TFPI,NPTN,PHKB,ACTR2,GABBR1,PTPN12,MICU2,RSRP1,HERPUD1,TANK,MYH9,MORC3,HMGN1,LYZ,GALC,PPP2CB,TGFBR2,CD9,NCOA3,DNAJA1,E2F3,CREB3L2,DDX3X,GBE1,GSN,SELENBP1,CLASP2,RALA,NCOA2,FYN,LTN1,CREBBP,PJA2,MSH3,WWP1,WSB1,TEK,AKR1C1,IGF1R,SMG1,USP33,DYRK1A,AUH,BNIP3,STAT3,USP14,H…	7.EMPP	NormalvsGATA1s	3079
REACTOME_SELENOAMINO_ACID_METABOLISM	5.93346	8.66713633503334e-28	3.28295285949334e-26	109	RPS4X,RPS26,RPL7A,RPL12,RPS3,RPS14,RPL18A,RPL10,RPLP0,RPL19,RPL6,RPL28,RPL29,RPL8,AHCY,RPS5,RPS2,RPL18,RPS12,RPL11,RPS15,RPL22L1,RPL41,RPS28,RPS7,RPL3,RPL13,RPSA,RPL32,RPL30,RPL5,RPLP1,RPS8,RPL36AL,RPL35A,RPL36,RPS13,RPS24,RPS3A,RPS27A,FAU,RPL10A,RPL24,AIMP2,SEPHS2,RPS15A,RPS21,RPS19,RPS9,RPL26,RPS23,RPL22,RPL34,RPL15,EEFSEC	5.EryP	NormalvsTrisomy21	2844
MOOTHA_HUMAN_MITODB_6_2002	5.93038	2.93483156728429e-27	1.84031202983826e-25	423	SLC25A5,CYB5R3,ATP5PO,SLC25A3,ATP5F1B,CNOT7,PMPCB,BCKDHA,NDUFS2,FDX1,MRPL57,ATP5PB,PRDX3,MRPS7,ATP5MC2,OXA1L,UQCRC1,VDAC2,UCP2,HAX1,TXN2,NDUFC1,ATP5F1C,MDH2,TUFM,ATP5PF,IDH2,SDHD,FIBP,SHMT2,FPGS,HADHA,SDHC,BCL2L1,MRPS2,ATP5F1D,NDUFS3,DUT,SLC25A11,MRPL9,CLN3,TBCB,MRPS27,TFAM,HCLS1,ACADM,BID,NDUFB3,ALDH2,MRPL46,MRPS22,MRPS17,DECR1,PPIF,ODC1,HTATSF1,NDUFB8,ACADS,MRPL22,CPT2,MRPL11,NBN,NDUFA5,CYBA,RP…	7.EMPP	NormalvsTrisomy21	2750
KIM_ALL_DISORDERS_OLIGODENDROCYTE_NUMBER_CORR_UP	5.92958	5.19334879972422e-37	3.55529988472864e-35	740	APLP2,RPS10,OAZ1,ALDOA,PFN1,CD9,STK24,RNH1,DMTN,FADS2,KIFAP3,CTSA,LY6E,DBN1,DAD1,SNTA1,ILK,PPP1CA,GNAS,EIF4G2,CA2,NCOA4,PSAP,ADRM1,FAM89B,RHOA,CTSH,ARPC2,SERPINI1,PMVK,ARF3,GABBR1,CAP1,MAGED2,LGMN,NUCB1,GPX4,ESYT1,PIP5K1C,SEC11A,TALDO1,ATP6V0C,ATP6V0D1,LGALS1,MRPL23,ARL4A,NRDC,HMGN1,TSC22D4,FAM171A1,AP2M1,TUBB2A,REEP5,CAPNS1,MAP1LC3B,CLASP2,AUH,CAMK1,IRF9,RPL36AL,RTN2,CCDC92,COPE,TAF10,BLOC1S1,IE…	6.EryMeg	Trisomy21vsGATA1s	3058
REACTOME_RHO_GTPASE_EFFECTORS	5.92328	9.39850088374654e-30	4.55400088276082e-28	258	FLNA,TUBA1C,PFN1,ACTB,MYL6,IQGAP1,ITGB1,CYBA,YWHAZ,RHOC,ACTR2,ARPC3,ROCK2,PRKCB,NCF4,CALM1,ARPC1B,RHOA,PPP1R12A,TUBB1,ARPC5,ARPC2,BTK,PRKCD,ARPC4,RHOB,MYH9,KIF2A,CTNNA1,CDC42,DAAM1,ACTR3,YWHAB,TUBB2A,YWHAH,WASF2,RAC1,CLASP2,PPP2R5A,PAK2,DYNC1I2,MYLK,PPP1CB,ABI1,NCKAP1L,DIAPH1,CFL1,GRB2,TUBB4B,MRTFA,MYL12B,NCOA2,CKAP5,RAC2,WIPF2,TAOK1,YWHAE,KDM4C,CTNNB1,TAX1BP3,DYNC1I1,DYNC1LI2,FMNL1,MAPK1,PPP2CB,…	6.EryMeg	Trisomy21vsGATA1s	3057
BLALOCK_ALZHEIMERS_DISEASE_DN	5.91973	1.74495440186089e-46	1.60708146146694e-44	1223	HERC2,ABCC4,APLP2,STAM,STK24,PIP5K1B,PPP1R12A,ACTN1,LRP12,KIFAP3,MEF2C,ASAH1,PRKAR2B,PTH2R,PRKCB,USP15,ROCK2,CLTC,RCOR1,DCAF6,ATP2C1,RANBP9,YWHAZ,HSPA5,CLASP2,NDFIP1,RAB2A,ACTR3,TOP1,PPP3R1,STAT1,MAP4K3,NUMB,ACTR2,MEG3,ACSL3,DENND4A,AUH,GLUL,LRRC8B,XK,FBXW7,CAB39,APC,CLIC2,MAP2K4,USP9X,GLS,MEF2A,GABBR1,SCFD1,DMTN,ATP6V1A,PTEN,HERC1,ZMAT3,JAK2,USP14,NPTN,PSMD1,NDEL1,AP2B1,DNAJC6,RSU1,ITPR1,NPEPPS,…	7.EMPP	Trisomy21vsGATA1s	3189
CHEN_METABOLIC_SYNDROM_NETWORK	5.91875	1e-50	1.165e-48	1210	CYBA,FLNA,STXBP5,ASAH1,TYROBP,PLXDC2,RNH1,TMSB4X,S100A11,STXBP2,CD63,HCST,NCF4,RASGEF1B,TAGLN2,LYZ,BACH1,PTPN6,PSAP,FOS,PRMT2,MYO1F,ARPC1B,STK24,EMP3,MAGED2,GADD45B,CD83,GPSM3,MAN2B1,CFP,MAP3K8,SH3BGRL3,NID1,ARPC2,RILPL2,LAPTM5,CD9,CALR,NPL,FCGR2A,OBSL1,FES,ABCC4,CLIC1,LMNA,SPI1,RHOC,CA2,USP20,FCER1G,ADAMTS3,CTSH,LGALS1,RELB,NRROS,FERMT3,AGPAT4,GMIP,EPB41,SDF2L1,LAT2,TPM3,ADAM8,AUTS2,LRP12,DOK2,C…	5.EryP	NormalvsGATA1s	3598
ZHENG_FOXP3_TARGETS_IN_THYMUS_UP	5.9165	2.27796224378041e-29	1.08962527327496e-27	199	LDLRAD4,CD84,RABGAP1L,MAP3K5,SGMS1,KLF6,JARID2,ELF1,C21orf91,CITED2,ITGA6,PTBP3,ATP6V1A,ARL4A,NCOA3,TPP2,SLAMF6,EVI5,SESN1,OTULIN,HEATR5A,ZFAND6,DUSP22,TOP2B,FLI1,STAT5B,SDCBP,TUBB4B,ZC3HAV1,FAM3C,B3GNT2,TOP1,ETS1,ASXL2,ZNF217,PIP4K2A,HBS1L,IBTK,MYO9A,ZYG11B,MBNL1,SLA,HIVEP2,BTBD10,CAST,TMEM64,TBC1D5,WNK1,PPP2R5C,CPOX,CBLB,ANKRD12,LNX2,STRN3,REEP3,VPS54,WDR37,TOX,ATG16L1,FAM8A1,TTC33,HERPUD2,ARMT…	6.EryMeg	Trisomy21vsGATA1s	3056
RODWELL_AGING_KIDNEY_UP	5.91632	4.52877040839155e-27	2.81614039895148e-25	477	IFITM1,RGS1,ARHGDIB,GMFG,TKT,HLA-E,SRGN,VIM,CLIC1,RPL28,RPL10,APRT,CORO1A,HLA-B,PSMB8,ARPC1B,ITGB2,RAC2,ITM2C,CXCR4,C15orf39,SYNGR2,PGLS,ARHGAP25,HCST,NFKBIZ,TRBC2,FSCN1,HLA-A,PTPN6,MAN2B1,RNF125,ABRACL,ADGRG1,RPL18,FXYD5,RAB33A,LAPTM5,RPS2,PPP1R18,RAB34,GRN,CMTM3,THEMIS2,ADAM8,TAGLN2,APBB1IP,CYBC1,ADGRE2,SERPING1,ARHGAP30,CRIP1,MGAT1,RUNX3,VSIR,LYSMD2,CD47,TBCB,SELPLG,KXD1,FEZ2,RPL12,ADGRE5,HCLS…	7.EMPP	NormalvsTrisomy21	2749
BAELDE_DIABETIC_NEPHROPATHY_DN	5.91515	1.33952413692432e-31	6.70661077950028e-30	429	PDLIM5,MTSS1,SLC2A3,RABGAP1L,SGMS1,FLNA,CD55,PRKAR2B,SEMA3C,TIMP1,AP3B1,FNBP1L,YWHAZ,DYRK1A,HSPA5,ACTR3,PDIA3,STAT1,DDX17,ACSL3,GLUL,CDC14A,ZC3HAV1,CTDSPL,USP9X,SP100,MORC3,HSP90B1,MYH9,ABI1,NPTN,CD164,TOP2B,CITED2,WWP1,TAX1BP1,KIAA0232,CD2AP,CREB3L2,FYN,CTNNA1,EFR3A,CBLB,ULK2,FRY,MGAT5,NFATC3,DAG1,VPS13D,RDX,MED21,ATP2A2,PPP2CB,ITGB3,PDE4DIP,KIF5B,EPS15,ELF2,CR1,RAB1A,ANXA1,ATP13A3,PTPN11,DCAF8,…	7.EMPP	Trisomy21vsGATA1s	3188
MILI_PSEUDOPODIA_CHEMOTAXIS_DN	5.91389	8.84048339763181e-37	6.58704417957546e-35	453	APLP2,TLN1,VCL,SPNS1,CD9,RPS10,LY6E,PFKL,CLIC1,TXNIP,PTGS1,PSAP,RPN1,ITGB1,VCP,TNFSF9,ZMYND8,MAST4,GLG1,LRP12,CLCN4,ZFP36,CDIP1,SOD1,ESYT1,SQSTM1,GRN,SCAMP2,ADD1,FOSB,THBS1,FOS,PTPRA,SGMS1,HSPA5,OBSL1,MAN2B1,SON,LGMN,PDIA3,BCAP31,GPR108,HSPA8,SLC10A3,MMP14,DDOST,HSD17B12,FAM171A1,SUN2,MFSD10,THRAP3,RPN2,SERPINE1,SCPEP1,PDIA5,DAG1,NEAT1,HLA-A,PUF60,LMBRD1,MALAT1,PLD3,BIRC2,PLXNB2,P3H1,CTNNA1,EIF1,…	6.EryMeg	NormalvsGATA1s	3159
HAMAI_APOPTOSIS_VIA_TRAIL_UP	5.91196	3.82181120844703e-36	3.0015298343393e-34	646	ASAH1,RABGAP1L,CD55,CDC42BPA,FYB1,ITGB1,AP3B1,SEMA3C,DNAJC3,RPS6KC1,PDCD10,NID1,PROS1,ITM2A,STAT1,GNPTAB,TRIM24,SPECC1,CENPC,APC,ARHGAP10,USP25,MICU2,ITGA6,AGTPBP1,CCDC88A,OSBPL8,FER,CROT,ZNF407,CTSZ,ZNF644,SON,ITFG1,BLZF1,DNAJA1,HECTD1,KIF5B,TAX1BP1,MID1,RALA,USP47,PBRM1,DCUN1D1,WDR11,PJA2,MSH3,WWP1,MTR,USP8,CCDC91,ITPR2,ZBTB38,PIR,BAZ2B,USP48,TUT7,HSP90B1,TCIRG1,BIRC2,SETX,RAPGEF6,RABEP1,ITPR1,…	7.EMPP	NormalvsGATA1s	3078
LI_INDUCED_T_TO_NATURAL_KILLER_UP	5.90855	1.03989976495105e-32	4.78610657251545e-31	313	CTSW,ASAH1,TYROBP,S100A11,GSTP1,TUBA1C,CD63,NCF4,AHNAK,PLP2,PRMT2,MYO1F,CAPNS1,S100A4,S100A10,SH3BGRL3,CD9,JUNB,FCGR2A,FES,TES,LMNA,TPST2,PIM3,FCER1G,ALDOA,LGALS1,SDF2L1,LAT2,PDLIM7,LRP12,NFIL3,DOK2,FURIN,VPS50,CD7,NDFIP1,MAPKAPK3,MFSD10,CAPZB,CYB5R4,PPIB,MYL6,STX11,SLC19A2,ANXA2,CDKN2A,APOBR,SERTAD1,FTL,EGR1,NFKB1,OSBPL3,OSTF1,TMBIM4,COMT,PRR13,STX7,IFITM2,P2RY14,MYO1G,GNG2,CTNNA1,SELENOS,ARL6IP…	5.EryP	NormalvsGATA1s	3597
CHAUHAN_RESPONSE_TO_METHOXYESTRADIOL_DN	5.90768	9.3020535678916e-26	3.11264231944427e-24	100	PCBP2,RPL12,SLC25A6,ZFP36L2,EEF1A1,VIM,ATP5PO,ARHGDIB,CAPNS1,LSP1,PABPC1,PHB2,EIF3F,DDOST,EIF3K,CTDNEP1,IL2RG,NME4,PTPN6,ERP29,PDLIM1,HSP90AB1,UBE2S,PKM,YWHAB,BTF3,HERPUD1,NUCB1,LGALS1,PGK1,UBE2I,S100A10,UBA1,HCLS1,GNAS,IDH2,COPE,ATP5MF,ARPC5,CSNK1E,NPC2,TMSB10,EIF3M,TLN1,MDH1,B2M,ATP6V1F,ADD1,WBP2,LTA4H,PIM2,CTBP1,AP3S1,LITAF,NCSTN,BTG2	5.EryP	NormalvsTrisomy21	2843
LINSLEY_MIR16_TARGETS	5.90603	3.93159672461868e-29	1.6851304693096e-27	202	MACF1,USP15,CDC42SE2,PIP4K2A,AREL1,FBXW7,LCOR,DCP2,DNAJB6,MAP4,MAPK1,WWP1,SUSD6,TMEM245,CLASP1,RHOC,UBE2Q1,CHD9,TACC1,EFCAB14,MAP3K2,PLEKHM1,MFN2,CRY2,RNH1,SETD3,UBAC1,ANKS1A,CACUL1,UHMK1,ZFP91,MKRN1,ELL,CDC37L1,GFPT1,SMURF2,KLHL15,PON2,DYNC1LI2,GOLGA1,SERPINE1,CDS2,TVP23B,PCMT1,BTRC,SLC9A1,ATXN7L3,NAPEPLD,ANKFY1,DNAJC5,DHDDS,EXT2,TLK1,FYCO1,SFXN5,ATG16L1,M6PR,PURA,ATG9A,FOXK1,DDHD2,PACS1,HIF1AN,…	7.EMPP	Trisomy21vsGATA1s	3187
REACTOME_RHO_GTPASE_EFFECTORS	5.9053	8.46338106408654e-30	3.71393074929915e-28	258	FLNA,PPP1R12A,PRKCB,ITGB1,ROCK2,YWHAZ,CTNNB1,IQGAP1,CLASP2,ACTR3,MRTFA,ACTR2,KDM4C,TUBA1C,PPP2R5A,NCOA2,MYH9,CENPC,ABI1,CYBA,NDEL1,MAPK1,TAOK1,WASL,CTNNA1,PPP1CB,CLASP1,GRB2,TUBB1,CKAP5,PRKCD,RANBP2,BTK,AHCTF1,PPP2CB,RHOC,ROCK1,PPP2R5C,PPP1R12B,KIF5B,DIAPH1,NCF4,WIPF2,PKN2,YWHAG,PAK2,PIK3C3,DAAM1,CDC42,PAFAH1B1,MAPK14,KLC1,KIF2A,NCKAP1L,DYNC1I2,NCK1,MYLK,KDM1A,TUBB2A,PFN1,PIK3R4,CLIP1,CALM1,RHOB,…	7.EMPP	Trisomy21vsGATA1s	3186
JIANG_MELANOMA_TRM2_CD8	5.90498	1.51694126977327e-29	5.43983890924942e-28	144	KLF6,ITM2A,MALAT1,NR4A2,SLC2A3,PTPRC,DNAJB6,ZFP36L1,TNFSF9,CYTOR,HLA-A,HLA-B,YPEL5,FOSB,RSRP1,PTGER4,HLA-C,CSRNP1,GADD45B,RASGEF1B,NFKBIA,RNF19A,MAP3K8,REL,UBC,STK17B,PNRC1,FOS,MCL1,PRNP,GNG2,ZFP36,TENT5C,CLIC1,PPP1R15A,CEMIP2,ANXA1,MYADM,CITED2,DUSP1,PIK3R1,SDCBP,RGCC,RALGAPA1,TUBA1A,NFKBID,TNFAIP3,NEU1,NR4A1,SERTAD1,BTG2,CCL5,NAMPT,NR4A3,NFKBIZ,BRD2,LYST,ZNF331,HSPA1A,DNAJB1,CBLB,CD74,JUN,BIRC3…	5.EryP	Trisomy21vsGATA1s	3632
REACTOME_ASPARAGINE_N_LINKED_GLYCOSYLATION	5.90434	1.44778606543382e-32	6.54223812356032e-31	297	TUBA1C,CTSA,CD55,PDIA3,TRAPPC10,TRAPPC1,VCP,CALR,NPL,RPN1,ARF3,CTSZ,PPP6R1,ANK1,NAPA,TUBB4B,OS9,DCTN1,TMED9,CAPZB,TFG,NEU4,DDOST,B4GALT1,RAB1B,SEL1L,CTSC,UBC,DERL2,FUCA1,ANKRD28,MGAT4B,MLEC,RPN2,COPE,TMED7,MAN2A2,ALG2,ARFGAP1,DYNC1LI2,ARF1,TUBA1A,DAD1,NUS1,ARFGAP2,ST3GAL2,SPTAN1,ACTR1A,STX5,LMAN2,SYVN1,KDELR1,MGAT5,DCTN2,CSNK1D,GMDS,NSF,COPG1,GOLGB1,SPTB,ALG1,DYNC1I2,GLB1,ENGASE,F8,ARFGAP3,BET1L,…	5.EryP	NormalvsGATA1s	3596
NAKAMURA_TUMOR_ZONE_PERIPHERAL_VS_CENTRAL_DN	5.90128	3.13793997457782e-35	2.0013083837863e-33	615	TESC,TIMP1,SLC2A3,NR4A2,ANKRD9,CFH,RHOBTB3,MACF1,TXNIP,MALAT1,SH3BGRL3,BACH1,SLC22A23,GLUL,HSPA5,ZMYND8,LXN,PHKB,FAM234A,CTSH,CITED2,PDK1,ZG16B,RAB11A,NEAT1,PRKAR1A,FUCA1,CROT,TFPI,YPEL5,BNIP3,ITM2B,KLF11,NFIL3,HERPUD1,FOS,WASF2,OBSL1,AUH,HLA-B,PNPLA8,CHMP4B,SLC5A3,INSR,SYNE2,RGL2,ABI1,STAT6,MFSD1,SLC33A1,ARHGEF7,RGCC,MKRN1,BCL2L11,DENND4C,LAMP2,RAC2,WIPF2,WDR11,STX5,ANP32A,BAMBI,ZBTB7A,GPCPD1,PK…	6.EryMeg	Trisomy21vsGATA1s	3055
REACTOME_TRANSCRIPTIONAL_REGULATION_BY_TP53	5.89771	3.16963580772587e-30	1.45959772380463e-28	359	MT-CO1,YWHAZ,TP53INP1,TP53BP2,PIP4K2A,ATF2,TFDP2,CDK13,GLS,EP300,PTEN,CNOT2,POLR2A,RICTOR,HIPK1,MT-CO2,CTDP1,TXNRD1,TNRC6A,SESN1,GATAD2A,CDKN2A,TNRC6B,WRN,CCNT2,CREBBP,MNAT1,CHD4,PPP2CB,GSR,PPP2R5C,CCNK,ING5,TAF2,ARID3A,CNOT4,YWHAG,CDK12,TP53RK,BRD1,SMYD2,TAF4B,RPTOR,CHD3,TCEA1,CRADD,GTF2F2,AGO3,APAF1,MAPK14,CSNK2A1,MDM4,ELL,RHEB,EHMT1,HIPK2,MT-CO3,BNIP3L,MDM2,POLR2B,YWHAB,MAPKAP1,RGCC,YWHAE,RFFL…	7.EMPP	Trisomy21vsGATA1s	3185
CHANDRAN_METASTASIS_UP	5.89556	6.80882917564743e-30	2.5142107337205e-28	199	PDLIM5,MALAT1,NEAT1,ZFP36L1,LYN,DNAJC3,EPB41,KMT2C,SMG1,SLC7A5,DDX17,AIG1,CPEB4,RBM39,POLR2A,SEL1L,GPATCH2L,CDKN2D,NFATC1,PDK1,E2F3,ZMYND8,ADD1,NORAD,NSD1,AP2B1,ZFYVE16,GSK3B,EML4,MAP4K4,JPT1,ZBTB7A,KANSL1,ZNF148,RALA,ADAM10,SULT1A2,RAB6B,KMT5B,TAOK1,WNK1,TMSB10,SPIN1,GRB2,EIF5,MORF4L2,ABHD5,IBTK,EP400,ADAM17,CBX4,P4HA1,DYNC1H1,ITPR1,CELF1,FGFR1OP2,TMCC1,DENND11,GRAMD4,ZNF281,RBBP6,FAM30A,SECISBP…	5.EryP	Trisomy21vsGATA1s	3631
GAZDA_DIAMOND_BLACKFAN_ANEMIA_ERYTHROID_DN	5.89332	2.14393662855112e-32	1.16774124979916e-30	436	ANK1,MAX,INF2,ACTR2,PTH2R,GSN,PSAP,CAPZB,PPP1R12A,SMAD3,CLEC1B,FAM30A,MMRN1,ALOX12,RHOB,OSTF1,BNIP3,MID1,CDC42,ARNT,LGALS1,MRPL23,RSRC1,ANXA3,OBSL1,TBXA2R,SKAP2,BAX,SLC39A4,RDX,NCOR1,BLOC1S1,AOAH,ATG5,SENP2,NNT,NCKAP1L,NOCT,TADA3,CDV3,TAX1BP1,SEPTIN6,RECQL,TWF2,PLEKHM1,LAMTOR2,TBC1D9B,LPIN2,CCDC28B,TRAF3IP3,MFN2,MAP4,ERN1,TAF12,HPS4,PURA,XRCC2,FMO5,KIZ,PITPNC1,IL27RA,CDKN1C,RBMS1,MTMR12,WNK1,C1or…	6.EryMeg	Trisomy21vsGATA1s	3054
GINESTIER_BREAST_CANCER_ZNF217_AMPLIFIED_DN	5.88899	1.21112389064235e-30	5.71834444569108e-29	326	TLN1,LMNA,CYBA,RBM33,CTNND1,B4GALT1,TSPAN14,SRRM2,PHF21A,CDC42SE1,GATAD2A,TNPO3,TTC17,DCAF8,GGA1,MCTP2,ACIN1,RAP1GAP2,BRD1,INTS1,NUP214,SMG7,FURIN,TRRAP,SETD5,ARHGEF11,PPP6R2,SRCAP,RBM14,DCLRE1C,ARHGAP17,DOT1L,MARK2,MTOR,LARP1,PBX2,ABCA7,PRRC2A,KHSRP,MDN1,EYA3,ZMIZ2,MINK1,TCHP,SUGP2,SAFB2,UBAP2L,HNRNPU,HDAC10,KMT2D,ZNF638,SMG5,GRAMD4,AP5Z1,CIC,SZT2,TICAM1,RAD54L2,THOC2,SNRNP70,REXO1,ZBTB5,CAPN15,…	7.EMPP	Trisomy21vsGATA1s	3184
WONG_EMBRYONIC_STEM_CELL_CORE	5.88895	2.5507131508945e-27	9.46936394625611e-26	329	EEF2,RPS3,ENO1,ATP5PO,RPS5,EIF4A1,ADSL,RPS12,MYC,MRPS2,PABPC1,SLC25A5,EIF3K,RUVBL2,ATP5PF,NME2,RPL13,RPSA,JPT1,EIF3L,THOC3,CDK4,NDUFA11,SNX5,NME4,RPS8,STOML2,PRMT1,GART,FARSA,ERP29,ZNF22,LSM2,MRPL12,APEX1,MRPL4,CTSC,MRPS18B,EIF3I,BTF3,EIF6,SDHC,NDUFB8,RNPS1,NDUFS2,PHF5A,PDCD2,NIPSNAP1,NHP2,PSMB5,TIMM13,RAB34,RPL10A,MTHFD2,EBNA1BP2,SDHD,SEPHS2,ETFA,PSMA7,NDUFAB1,ECHS1,SLC2A1,HNRNPAB,BUB3,FBL,ADH5,…	5.EryP	NormalvsTrisomy21	2842
STARK_PREFRONTAL_CORTEX_22Q11_DELETION_DN	5.88838	5.47455326482919e-27	3.37612532745086e-25	511	EIF1,SLC25A5,DIPK1B,C1QTNF4,ATP5PO,SEC61B,AKR1A1,COMT,EIF3F,LAMTOR1,EIF3K,ADH5,RPL8,EIF3L,NR1H2,SMARCB1,TRBC2,MZT2A,MRPL57,PRDX3,ATP6AP1,RPL18,TPI1,VDAC2,LRPAP1,DNAJC15,EIF4G2,LEPROTL1,ELP5,GUK1,RTRAF,FMC1,C4orf3,ATP5F1C,MGST3,RRP7A,MDH2,ATP5PF,ABT1,OCIAD2,RPL22L1,CRYZL1,GET3,PPP1CA,IFNGR2,SPSB3,MED28,SRP9,AP2M1,DDX56,PDCD6,SS18L2,CLNS1A,BCAP31,NDUFS3,TXNDC17,SCAND1,KXD1,PRELID1,GPI,CCT2,ZNF511,N…	7.EMPP	NormalvsTrisomy21	2748
LIU_SOX4_TARGETS_DN	5.8868	6.70445227708797e-30	3.03122509012583e-28	306	PDLIM5,APLP2,GSE1,ATP9B,SMYD3,INF2,WDR26,PDK1,KDM6A,HECTD4,TFPI,TBC1D5,MAP4,FAF1,RPN1,UBA6,USP34,SLC35F5,CTDP1,HPS1,SGPP1,PUM1,SLC44A1,CUL3,ETV6,TNRC6B,DHX9,CCND3,BNIP3,OPA1,MRPS12,ARMH3,PPP2R2A,CHFR,TMEM135,ZDHHC21,DLG1,MTMR3,EP400,SSX2IP,IRF9,ATF6,FECH,UBE3C,PPIL2,FLOT2,STAG2,PAFAH1B1,MAPK14,SCAMP1,NCOA6,TBC1D9B,ABHD17A,CBFA2T2,PDCD4,ITSN2,PGGT1B,PI4KA,PPFIA1,FUBP1,RAB14,PFKL,TWF1,HIPK3,RAF1,TR…	7.EMPP	Trisomy21vsGATA1s	3183
ZWANG_CLASS_1_TRANSIENTLY_INDUCED_BY_EGF	5.88544	1.49486678287783e-34	6.88284650215169e-33	482	PDLIM5,KLF6,VCL,ARHGAP6,BACH1,SGMS1,LYN,SMAD3,JARID2,NFAT5,RNH1,PNPLA8,RHOB,PTGER4,HSH2D,DIPK2A,ITGB1,ANKRD28,MIDN,ABHD2,GADD45B,UBE2H,PIM3,RNF19A,HIF1A,ARHGAP21,CTSH,BMP2K,ARL15,STK17B,AFF4,CAB39,USP6NL,IRF2BP2,FNBP1L,KLF7,ZNF217,TMEM131L,TRAF6,ZFP36,TMEM117,AKAP13,RAB8B,CHD1,LRRFIP1,RAB6A,ATP6V0A1,FOSL1,MAPK6,PTPN1,SDE2,FOXN2,ZNF800,BCOR,SLC19A2,KBTBD2,MAP2K3,IER2,NOCT,PIM1,CCNL2,OSBPL3,AKIRIN1…	5.EryP	Trisomy21vsGATA1s	3630
REACTOME_INFECTIOUS_DISEASE	5.8837	3.12477493743504e-36	1.79362081408771e-34	993	RPS4X,RPS26,EEF2,PCBP2,RPL7A,RPL12,RPS3,RPS14,SLC25A6,RPL18A,RPL10,RPLP0,IMPDH2,RPL19,EEF1A1,RPL6,HSPA8,ENO1,RPL28,TUBA1C,RPL29,RPL8,RPS5,RPS2,RPL18,RPS12,RPL11,TUFM,RPS15,VPS28,TRIM28,RPL22L1,SLC25A5,RPL41,GNAI2,RPS28,DDOST,COMT,RPS7,RPL3,RPL13,RPSA,TUBA1B,FKBP4,RAN,IL1B,RPL32,BCAP31,ARPC1B,TGFB1,RPL30,RPL5,RPLP1,TXNIP,HMGA1,TUBB4B,RPS8,PSMF1,PRMT1,PTPN6,HSP90AB1,CXCR4,NPM1,CNBP,RPL36AL,RPL35A,H…	5.EryP	NormalvsTrisomy21	2841
REACTOME_POST_TRANSLATIONAL_PROTEIN_MODIFICATION	5.88323	1e-50	1.165e-48	1370	TGFB1,TIMP1,HERC2,ZBTB16,PRKN,TUBA1C,APLP2,NR4A2,ANKRD9,CST3,CTSA,NFKBIA,CD55,PDIA3,IGFBP7,HLA-A,SQSTM1,TRAPPC10,CFP,TRAPPC1,VCP,PNPLA2,CALR,NPL,OBSL1,NUCB1,STAM,TPST2,RPN1,USP20,ARF3,CTSZ,ADAMTS3,LGALS1,RAB5C,PPP6R1,ANK1,NAPA,DNAJC3,SUMO3,TUBB4B,SMAD3,HSP90B1,FURIN,NR1H2,ADRM1,OS9,SP100,MBD6,SNX3,DCTN1,LY6E,P4HB,TMED9,HIF3A,RAB8A,CAPZB,USP16,CSF1,TFG,NEU4,DDX17,HSPA8,DDOST,TGFBR2,AGTPBP1,B4GALT1…	5.EryP	NormalvsGATA1s	3595
JAATINEN_HEMATOPOIETIC_STEM_CELL_UP	5.88089	3.17449853392765e-26	1.88000857620382e-24	312	AREG,HSH2D,GNA15,SMIM24,ALDH1A1,LAPTM4B,SOCS2,CD34,DIPK1B,SPINK2,IGFBP7,KIT,C1QTNF4,IGLL1,JUP,BAALC,IQGAP2,AKR1A1,ITM2C,BEX2,TAF1D,MZB1,MIR155HG,GATA2,NRIP1,SLC27A2,RAB34,CDK6,PPM1H,CYYR1,BSPRY,NDN,OBSL1,BCL11A,PSMB5,ZNRF1,SERPING1,FHL1,PSMG1,HHEX,ATP9A,MRPS27,RBPMS,FLT3,RCN1,TNFRSF21,TCEAL4,TMEM44,ADAM28,NPR3,ZNF395,ZBED3,RUVBL2,PLCB1,FRMD4B,ISYNA1,TGFBRAP1,FABP5,VWDE,MYO18A,GLIDR,TUSC1,SCN3A,SV…	7.EMPP	NormalvsTrisomy21	2747
MOOTHA_PGC	5.87927	5.14222978962778e-29	2.05194217594666e-27	412	ENO1,GAPDH,ATP5PO,CA2,ADSL,TUFM,MRPS2,PHB2,SLC25A5,TPI1,PGLS,RUVBL2,COMT,MDH2,EIF3L,TXN2,CNOT7,TOMM40,GPX4,UQCRC1,PTPRD,LDHB,GPI,FOS,PKM,MRPL4,MRPS18B,ATP5F1A,PGAM1,UROD,PCYT2,BAG6,DDIT4,GRSF1,MRPS12,MRPL34,CYC1,POLDIP2,PSMB5,TIMM13,PTGES2,VAMP8,PGK1,MRPS34,PDCD6,MTHFD2,POLR2E,MPC2,NDUFS3,ACADS,TWF2,NDUFA8,NDUFAB1,MTX1,SLC25A11,NDUFB5,HSPBP1,TRIAP1,GUK1,FDX1,NFYC,MRPL58,ACADM,IDH2,GRPEL1,POLR2F,M…	5.EryP	NormalvsTrisomy21	2840
HALLMARK_TNFA_SIGNALING_VIA_NFKB	5.87815	4.21595086233209e-25	2.383289798085e-23	199	AREG,EGR1,EIF1,BHLHE40,NR4A1,ETS2,MAP3K8,FOSL2,ZFP36,NR4A3,NFKBIA,IER2,MAFF,BTG1,YRDC,JUNB,FOSB,DUSP2,IL1B,CEBPB,TSC22D1,TNFAIP3,CSF1,JUN,BTG2,FOS,ID2,KLF2,PDE4B,DUSP1,MYC,NFKBIE,ABCA1,LITAF,BCL3,KDM6B,RHOB,FOSL1,BIRC2,GADD45B,IRS2,IFNGR2,RELA,GCH1,SAT1,MCL1,IRF1,BTG3,DRAM1,RELB,BIRC3,NINJ1,EGR3,NFIL3,ZC3H12A,TNFAIP8,PLAUR,STAT5A,SOCS3,PANX1,NFKB2,IFIT2,NFKB1,SNN,KLF10,IL18,EHD1,CD69,HES1,PTGER4,…	7.EMPP	NormalvsTrisomy21	2746
FORTSCHEGGER_PHF8_TARGETS_DN	5.87654	3.26634251585853e-36	2.62044962481941e-34	753	ELL2,RABGAP1L,GNAQ,LRP12,PPP1R12A,DNAJB6,CPEB4,INF2,RAB2A,OSBPL3,PTBP3,MICALL2,TSPAN14,LGALS1,FUT8,DCAF6,PTGS1,PTPN12,AGPAT3,DCP2,NFE2,CMTM6,CCND3,FER,CD9,IGFBP7,TMEM164,MBNL1,SNX29,GBE1,FCHO2,CLASP2,ZC3HAV1,F11R,TMBIM1,NAPG,PTS,ULK2,AMMECR1,ILK,MSH3,AHNAK,TMEM50B,ERC1,ATP11A,TDG,NSF,CCL5,STK17A,PRRC2B,CCNL2,PLEKHM1,SENP7,USP14,SMYD3,ZNF655,MTCL1,RELB,LCOR,BCL2L1,AFF4,USF3,CALM1,SPIN1,SDCBP,PLEKH…	7.EMPP	NormalvsGATA1s	3077
LOPEZ_MBD_TARGETS	5.87654	5.04504536404028e-43	3.33017640445809e-41	925	APLP2,MAX,VCL,PTTG1IP,NEAT1,ACTN1,CD63,LYZ,SERPING1,NCOA4,YES1,C15orf39,AGPAT3,GSTP1,HLA-B,CAPN1,TPM3,ITM2B,RHOB,PPP1CB,USP20,TP53BP2,RHOC,CDC42,GNAQ,ELF4,CTNNB1,HDAC5,RAB2A,ABHD2,GADD45B,NFKBIA,RAB10,BNIP3L,CTSH,PDCD10,TFG,STAT5A,AMBRA1,ADIPOR2,ALDOA,MEG3,CDKN1C,BRAF,QKI,ARID4B,EZR,RAB1A,ALDH3B1,HSPG2,BAZ2B,S100A10,CD70,ARPC3,TXNRD1,SERPINE1,CAPZB,RPN1,FAM89B,ATP6V0C,RAB5C,HUWE1,LRRFIP1,RAB6A,ZB…	5.EryP	Trisomy21vsGATA1s	3629
DANG_BOUND_BY_MYC	5.87598	1.54930942812284e-46	1.35901777600987e-44	1010	TGFB1,CYBA,MEIS2,ASAH1,PAPPA,GSTP1,CD63,CD164,ZFP36L1,MSN,TAGLN2,BSG,PTPN6,HERPUD1,IER2,PSAP,OAZ1,SQSTM1,GPSM3,VCP,NID1,JUNB,CALR,ABCC4,LMNA,LAMP1,FLOT2,GMIP,SDF2L1,U2AF1,IRF9,SERPINE1,NFIL3,SMAD3,HSP90B1,RABGEF1,STAT6,DDX3X,PFN1,SPTLC2,SNX3,PKM,RAB8A,ADGRE5,ILK,VASP,FOSL1,CTDSP1,ZFP36L2,DDX17,HSPA8,RAC2,BLZF1,ARHGEF7,SYK,IFNAR1,MAT2A,E2F3,RGL2,YWHAH,XK,CTSC,ICAM1,PTOV1,SERTAD1,MAFF,PER1,MKRN1,WT…	5.EryP	NormalvsGATA1s	3594
WANG_RESPONSE_TO_GSK3_INHIBITOR_SB216763_UP	5.87217	1.7038618058524e-30	1.04200925684137e-28	348	PLXDC2,CD36,ASAH1,CD84,FYB1,PRKCB,PRKAR2B,CD4,CPEB4,PROS1,PTPRC,NCF4,ZMAT3,PLD1,FRRS1,RSRP1,AGTPBP1,FOXN2,PSAP,HPS1,CD68,PSTPIP2,F11R,ARNT,AHCYL2,CTSH,RNF130,TET2,ITCH,ZFYVE16,WASHC2C,ZNF641,SENP7,STAT2,MALAT1,SYCP2L,AP1G2,PITPNC1,ATF7IP2,ATP6V1A,RCAN3,R3HDM2,STAC3,GRAMD2B,SLC7A11,TRAF3IP3,LAMP1,KMT2C,TMEM131,VWA8,AFG1L,IL10RB,PLSCR1,MR1,CLN8,C18orf32,B2M,KLHDC1,TRIM38,CTNND1,WASHC2A,ZFAND3,RPRD2…	7.EMPP	NormalvsGATA1s	3076
WEST_ADRENOCORTICAL_TUMOR_UP	5.87172	1.58294487024757e-30	8.14616180812921e-29	291	TUBA1C,OAZ1,CD164,RHOBTB3,ACTR2,ARPC3,ELF4,ARF3,PIR,DNAJB6,STOM,PTP4A2,GNG5,ELOVL6,TUBB2A,COPE,ANKMY2,IGF2BP3,NNT,SLC7A5,CAPZA1,MLF1,TUBB4B,UFD1,AREL1,PLA2G15,RIOK3,PLEKHB2,GPR89B,RNGTT,RNF34,MCUR1,SPTLC1,UBL5,RPAP3,MAPRE1,RTN4,DCTN2,TNPO3,TMEM131L,PANK3,DICER1,TDG,ATP1A1,TBK1,UBE2K,XPO1,TMED9,NRAS,ZBTB43,FAM32A,KIF5B,PSMD11,ELMO2,TWF1,TBC1D13,LSS,BUB1,PIGK,JAG1,VPS41,USP14,NEU1,MVD,SLC25A24,TXND…	6.EryMeg	Trisomy21vsGATA1s	3053
GRAESSMANN_APOPTOSIS_BY_DOXORUBICIN_UP	5.87053	8.73936792032685e-48	8.4624321057087e-46	1112	PDLIM1,PDLIM5,ITGA2B,FOSB,COL18A1,NCOA4,CAPN1,AHNAK,ZFP36,TP53INP1,NR4A1,FOS,SPNS1,PDE4DIP,ARPP21,EMP3,TMBIM1,MAN2B1,JPT1,SH3BGRL3,STAT1,CITED2,ATP6V0C,PNPLA2,JUNB,PTGER4,USP20,ZNF385A,NAPA,ADAM8,PDLIM7,TUBB4B,GNA15,CXXC5,CPEB4,RABGEF1,F11R,C21orf91,CD68,DNM2,INPP5D,MIDN,ZMAT3,SP100,POLR2A,CCS,YPEL5,CIRBP,FOSL1,CSF1,DNAJB1,HMG20B,JUP,IRF7,JAK3,AGTPBP1,ATP6V0B,ICAM5,NBEAL2,SLC19A2,ACADVL,BCAP31,AT…	5.EryP	NormalvsGATA1s	3593
REACTOME_ER_TO_GOLGI_ANTEROGRADE_TRANSPORT	5.86971	4.02833970977983e-28	1.79996831822617e-26	152	ANK1,TUBA1C,CD55,TRAPPC1,SPTA1,CAPZB,TUBB1,CTSZ,ARF3,PPP6R1,TRAPPC10,SPTB,TUBB2A,NAPA,COPE,DYNC1I2,RAB1B,CAPZA1,CAPZA2,TUBB4B,TFG,TMED7,STX5,ARF4,GOLGB1,DCTN1,PPP6R3,SCFD1,DYNC1I1,DYNC1LI2,CTSC,COG4,DCTN2,NSF,TRAPPC2,ARFGAP1,GBF1,ARCN1,LMAN2,TRAPPC3,TMED9,TRAPPC6B,GORASP1,ARF1,PREB,TBC1D20,TRAPPC5,DCTN5,COPA,NAPG,STX17,TUBAL3,RAB1A,BET1L,ARFGAP2,SEC22A,COG5,ARFGAP3,TRAPPC9,F8,COG8,SEC24C,SEC31A,G…	6.EryMeg	Trisomy21vsGATA1s	3052
REACTOME_SRP_DEPENDENT_COTRANSLATIONAL_PROTEIN_TARGETING_TO_MEMBRANE	5.86947	1.68215610663312e-26	6.30766274758611e-25	113	RPS4X,RPS26,RPL7A,RPLP0,RPS3,RPL10,RPL19,RPL28,RPL12,RPS14,RPL18A,RPL6,DDOST,RPL8,RPL29,RPS5,RPL18,RPL11,RPN2,RPS15,RPSA,RPL41,RPS12,RPL36AL,RPS2,RPS7,RPLP1,SEC61B,RPL35A,SSR2,RPL30,RPL3,RPS8,RPL32,RPL5,RPL22L1,SSR3,RPS27A,RPS28,RPS13,RPL36,SRP9,RPL10A,SSR4,RPL13,SRPRA,RPL15,SRP68,SRP19,FAU,RPS24,RPS9,RPN1,RPS3A,RPS19	6.EryMeg	NormalvsTrisomy21	3011
REACTOME_EUKARYOTIC_TRANSLATION_ELONGATION	5.86709	2.65726324848121e-26	9.8649245572969e-25	94	RPS4X,RPS26,EEF2,RPL7A,RPLP0,RPS3,RPL10,RPL19,RPL28,RPL12,EEF1A1,RPS14,RPL18A,RPL6,RPL8,RPL29,RPS5,RPL18,EEF1D,RPL11,RPS15,RPSA,RPL41,RPS12,EEF1G,RPL36AL,RPS2,RPS7,RPLP1,RPL35A,RPL30,RPL3,RPS8,RPL32,RPL5,RPL22L1,EEF1B2,RPS27A,RPS28,RPS13,RPL36,RPL10A,RPL13,RPL15,FAU,RPS24,RPS9,RPS3A,RPS19	6.EryMeg	NormalvsTrisomy21	3010
ACEVEDO_LIVER_TUMOR_VS_NORMAL_ADJACENT_TISSUE_UP	5.86643	1.3814189600718e-38	9.90902446359196e-37	832	JARID2,KIFAP3,ROCK2,PTBP3,AP3B1,RSRC1,PHACTR4,LMNA,TP53BP2,TUBA1C,ARHGAP12,PPP2R5A,PTPN12,TFG,CCDC91,XPR1,ITPR2,COP1,ZMAT3,USP34,ELOVL6,LYZ,SDCBP,PTPN1,DNAJB11,FAM20B,S100A10,TXNRD1,DYNLRB1,TAX1BP1,TSPAN14,CREB3L2,AFF4,CPQ,SENP2,CD9,CRY1,GBE1,ABHD5,USP3,ATP2A2,ANKMY2,LRRC8D,UBE2Q1,NAA10,METAP1,TFRC,NSMCE2,FKBP5,PARP4,GOLGA4,PIR,CCL5,CDR2,ATP6V0E1,PRRC2C,VAMP7,HIGD1A,MAN1A2,EIF3J,ANO6,NEDD4L,MTM1,…	7.EMPP	Trisomy21vsGATA1s	3182
BRUINS_UVC_RESPONSE_LATE	5.86616	1.14027187473586e-45	8.25756108121822e-44	1104	STXBP5,TLN1,PLXDC2,GPC4,CD55,LRRFIP2,NID1,RUFY1,SQSTM1,KLF10,KIFAP3,CAPN1,TAOK3,RHOB,AHNAK,DYRK1A,ARHGEF7,PTEN,RAB2A,ZFAND6,ATP2B1,RAB10,PDCD10,PPP1R12A,DDX6,PACSIN2,TGFBR2,B4GALT1,MEG3,MCL1,CAB39,PRNP,TMBIM6,PTP4A2,PLEKHB2,KDM6A,ZNF326,ODF2L,SMURF1,RSU1,RSRC1,DOCK2,NBAS,TALDO1,PPP6R3,PRKAR1A,MARK3,TRAM1,MAP4,ANXA1,FER,GATAD2A,RIOK3,CUX1,DCBLD2,BMPR2,FXR1,TANK,CITED2,NUDT4,ATXN7,USP47,FARP1,PER1,…	5.EryP	Trisomy21vsGATA1s	3628
MONNIER_POSTRADIATION_TUMOR_ESCAPE_DN	5.86607	1.88288801412555e-30	9.62336326123619e-29	371	ANK1,TMSB4X,MIR4435-2HG,MYL6,RABGAP1L,HIGD1A,KLF6,GSN,GSTP1,PDK1,KMT2C,STAT1,CLIC1,DNAJC3,RHOB,ARHGAP12,NAA38,BNIP3,KLF10,UBC,FOS,PFKL,NDUFA13,SNX14,RIPOR3,SKAP2,PNPLA8,RNF19A,PLD1,GRN,DECR1,IER2,RRAS,ZFAND6,WIPI1,STX7,BCL2L11,ZNF438,APOOL,NCOA2,ZDHHC2,RMDN1,WDR11,ANP32A,TSPO,PRELID2,TSC22D3,METTL15,SSBP3,SLC66A3,CRYZ,KANSL1L,MYCBP2,TOR1AIP2,THOC7,BNIP3L,FAR1,PURA,PPP1R15A,CAST,COG4,STIM2,SOS2,TM…	6.EryMeg	Trisomy21vsGATA1s	3051
GRAESSMANN_APOPTOSIS_BY_DOXORUBICIN_UP	5.86509	3.49255250097219e-42	3.94817184996265e-40	1112	PDLIM5,ITGA2B,PDLIM1,FOSB,POLR2A,CPEB4,JPT1,TP53INP1,CITED2,PDCD10,RABGEF1,GLUL,STAT1,NCOA4,INPP5D,C21orf91,NCOA1,SP100,ZMAT3,SPNS1,DNM2,NBEAL2,ITGA6,AGTPBP1,ARPP21,PDE4DIP,UGGT1,CAPN1,STIM1,PTPN1,CROT,COL18A1,EXOC4,DNAJA1,SUSD6,CD68,PSTPIP2,GSN,TUBB4B,PRKCD,F11R,UBE2E1,TMBIM1,CSF1,YPEL5,AHCYL2,INPP5B,TMEM41A,AHNAK,WSB1,NAPA,ZC3H12C,NR4A1,ABHD5,SLC19A2,CCNL2,FUCA1,ACAD8,MAN2B1,USP20,TUT7,ICAM5,SH…	7.EMPP	NormalvsGATA1s	3075
REACTOME_DNA_REPAIR	5.86288	7.12136320516723e-30	3.18115985093099e-28	285	HERC2,RAD51B,POLR2A,SPIDR,PIAS1,BABAM2,NPLOC4,WRN,TDG,MNAT1,MSH3,RIF1,INO80,ASCC3,RNF4,AQR,SMARCA5,VCP,INO80D,POLK,TCEA1,REV3L,MAPK8,ELL,XRCC4,FTO,POLR2B,DCLRE1C,FANCL,USP7,UIMC1,WDR48,ATR,ACTR8,ABL1,MGMT,EYA3,FANCC,COPS4,PARG,BLM,ATM,RAD23B,UFD1,USP45,POLE2,MRE11,TDP1,PRKDC,MBD4,CUL4A,RCHY1,POT1,ASCC2,KDM4B,DTL,PAXIP1,ACTB,CDK7,USP10,REV1,GTF2H2,ERCC6,DCLRE1A,KDM4A,XRCC2,COPS7A,XRCC5,XPC,RBBP8,F…	7.EMPP	Trisomy21vsGATA1s	3181
YAO_TEMPORAL_RESPONSE_TO_PROGESTERONE_CLUSTER_17	5.86242	2.86550092444447e-26	1.05853306426756e-24	183	IMPDH2,TPM4,GSTP1,DDOST,LAMTOR1,PHB2,PUF60,TALDO1,LSM7,RPN2,ADSL,SRSF9,RNF7,MDH2,EIF1AX,CRYGD,ERP29,ABRACL,LRPAP1,DDX54,TWF2,NME2,PTDSS1,MRPS7,TMED10,PSMD8,PDCD2,SMDT1,MARCKSL1,NDUFAB1,SERF2,EIF4A3,UBA1,NDUFA11,UFC1,PSMB6,CDK4,EVL,PSMG1,COPS6,NDUFS3,EIF4E2,LYPLA1,MRPL34,FKBP1A,DPP3,DCTN2,COPE,TOR2A,MRPS12,UBE2S,ROMO1,YIPF5,MRPL16,ARL2BP,HSD17B12,TRAPPC4,SLC25A39,STUB1,ERH,YJU2,MRPL58,DDX1,STARD7,…	6.EryMeg	NormalvsTrisomy21	3009
CHAUHAN_RESPONSE_TO_METHOXYESTRADIOL_DN	5.86178	2.49071319931894e-26	9.29285094665897e-25	100	PCBP2,ZFP36L2,ARHGDIB,ATP5PO,VIM,CAPNS1,SLC25A6,LGALS1,LSP1,RPL12,EEF1A1,PKM,DDOST,IL2RG,PABPC1,EIF3K,PHB2,CTDNEP1,EIF3F,BTF3,PGK1,PTPN6,NUCB1,ERP29,YWHAB,B2M,LITAF,GNAS,TNFAIP3,IDH2,PIM2,UBA1,ARPC5,BTG2,HCLS1,CSNK1E,TRBC2,PDLIM1,NPC2,COPE,MDH1,HERPUD1,UBE2S,NCSTN,HSP90AB1,ADD1,TMSB4X,LTA4H,AP3S1,XBP1,ATP6V1F,NME4,EIF3M,S100A10,CD48,ATP5MF,CYFIP2,CTBP1	6.EryMeg	NormalvsTrisomy21	3008
OSWALD_HEMATOPOIETIC_STEM_CELL_IN_COLLAGEN_GEL_DN	5.85801	4.88395646778223e-30	2.46243805152642e-28	263	SLC2A3,LDLRAD4,IL2RG,ARMC8,CD9,RGS10,ACTR2,TXNIP,SLC16A3,ATP2A3,RSRP1,MMRN1,GPSM3,TMOD3,GYPA,DDX17,BNIP3,THBS1,MED13L,EFCAB14,MT1F,BAX,POLD4,PTPRCAP,PAK2,CR1,RASGRP3,ATP9B,RRAS,AGFG1,BMPR2,CDV3,RIOK3,IRAK4,BACE2,P4HA1,F2R,TSPAN32,KANSL1L,SLC50A1,RRN3,UBE2W,MT1X,PTPN22,PLAG1,SERPINF1,UGCG,SNX19,SRSF6,MT2A,SOS2,TRAPPC2,MAPRE2,HSPA1A,MAP3K2,RAB3GAP2,ANKRD12,MINDY3,ARMH3,ZKSCAN1,PGGT1B,ANKRD11,EGLN3,…	6.EryMeg	Trisomy21vsGATA1s	3050
TIEN_INTESTINE_PROBIOTICS_24HR_DN	5.85665	2.57266332265534e-28	1.05450925203345e-26	203	CD55,RANBP9,HSPA5,RAB2A,NCOR1,PDIA3,PJA2,AUH,ATF2,TFG,NUDT4,TANK,HSP90B1,TES,COG5,TXNRD1,SH3GLB1,IFRD1,AKR1C1,FNDC3A,ARIH1,TTC17,SQSTM1,MAN1A2,ATL2,ZNF236,MCTP2,SEL1L,TBC1D15,STX5,UBE2H,GRB10,PDE8A,HERPUD1,TCEA1,MBNL2,JAG1,TMEM39A,ARF4,PDCD4,ARHGAP35,LPIN2,P4HB,CSNK1A1,TMED7,TRAM1,NFIL3,GFPT1,BNIP3L,ZMYM4,MIA3,SDF2L1,TMCO3,HYOU1,FAM120A,PDIA4,RMND5B,VASP,CLCN3,WIPI1,ALDH3B1,CDC5L,THOC2,KAT6B,CDK2…	7.EMPP	Trisomy21vsGATA1s	3180
IVANOVA_HEMATOPOIESIS_EARLY_PROGENITOR	5.85155	4.60454856570401e-31	2.21612466452593e-29	438	ABCC4,ARHGAP6,STAM,PARD3B,LRP12,P2RY14,RSRC1,CTNNBL1,SPN,RFX7,ATG10,DCP2,SPPL2A,GNPTAB,LCORL,RIPK1,UBASH3A,DYNLRB1,CLASP1,SOSTDC1,TOX,SLC10A7,MGAT5,LXN,DHX9,UBE2Q1,CUX1,ZNRF2,GNB4,MRPS12,ING5,SPAST,BCKDHB,UBE2Q2,GMDS,CUL2,ABL2,ODF2L,DICER1,MED14,PITPNC1,NRROS,COMMD1,LUC7L,LCLAT1,CTDSPL2,G3BP1,UBE3A,DTNBP1,TRAK1,PDXK,RBM34,ELP3,GALK2,HSPA1A,SOCS6,LYPLAL1,TDRD3,ZRANB3,OPN3,SNX9,C15orf39,YLPM1,SEPTI…	7.EMPP	Trisomy21vsGATA1s	3179
GABRIELY_MIR21_TARGETS	5.85106	1.30778099195843e-28	7.28160744850881e-27	284	GNAQ,RHOBTB3,ARHGAP21,UBR3,OSBPL3,PTBP3,GPD2,WWC2,ACTR2,APC,PLD1,ATAD2B,UGGT1,TGFBR2,RASGRP3,HECTD1,DDX3X,USP47,PBRM1,LCORL,NFAT5,ZBTB38,PIK3R1,STAT3,RNF38,ZNF292,ZNF326,BMPR2,YME1L1,TRPM7,SPIN1,LMBR1,MYEF2,RAB3GAP2,MGA,SLC5A3,CEMIP2,WNK1,TPM1,DYNC1LI2,MAP3K1,PHF20L1,EXOC5,TACC1,SRPK2,GOLGA4,APAF1,FBXL17,MEGF9,ATF2,PURA,CNTRL,SCAF11,RFX7,TRIM38,LNPK,SNX13,ANKRD28,RALGPS2,BTBD7,TNPO1,SYNE2,PTAR1,S…	7.EMPP	NormalvsGATA1s	3074
REACTOME_METABOLISM_OF_LIPIDS	5.85006	3.91153385799644e-37	3.20702792467159e-35	730	CYP7B1,CD36,RUFY1,ASAH1,SGMS1,PIP5K1B,MBOAT2,LTC4S,MFSD2B,CTSA,PIK3CB,HACD1,MED13L,OSBPL6,ACSL3,OSBPL3,INPP5D,GPD2,NCOA1,FADS2,PTGS1,NCOR1,PLD1,SPTLC2,AGPAT3,OSBPL8,ELOVL6,SYNJ1,PSAP,SLC44A1,GALC,GPCPD1,MBOAT1,CROT,SREBF1,NCOA3,PNPLA8,LIPH,NCOA2,ARNT,CREBBP,TXNRD1,PIP5K1C,AGPS,THRAP3,AKR1C1,ABHD5,PCYT1A,PIK3R1,PLEKHA2,NR1H2,ARF3,MTMR14,ALOX12,MED21,SUMF1,HSD17B4,MED23,PNPLA6,NFYC,PIK3R5,EP300,SGP…	7.EMPP	NormalvsGATA1s	3073
JOHNSTONE_PARVB_TARGETS_3_DN	5.84362	8.48348594150796e-38	7.27532052983803e-36	847	ACTN1,ELL2,RABGAP1L,SGMS1,CDC42BPA,DNAJB6,PRKAR2B,YES1,CTNNB1,PIK3CB,DNAJC3,SLC7A5,PTBP3,RSRC1,IFRD1,FOXN2,ZNF273,MORC3,CCND3,ORC4,ATP9B,CTSC,MBNL1,BLZF1,FKBP5,STAM2,TAX1BP1,PDK3,MID1,DCUN1D1,CDC42SE2,ECPAS,AP1G1,TDG,C1orf174,MAN2A1,SENP7,SLC25A24,PRRC2C,BMPR2,RAPGEF6,UBAP2,SPIN1,PRKAR2A,SOCS6,WDR33,PLEKHB2,QKI,TMEM50A,PGGT1B,ZCCHC7,TAF13,LUC7L2,XRCC4,SLC7A11,NCK1,RBMS1,TPM1,RECQL,GOLT1B,CEP70,HO…	7.EMPP	NormalvsGATA1s	3072
REACTOME_ADAPTIVE_IMMUNE_SYSTEM	5.84318	2.9644588076151e-37	2.45834064588401e-35	808	HERC2,DNM3,PRKN,LAT,CD36,KIFAP3,ZBTB16,RNF182,FYB1,PRKCB,TYROBP,ITGB1,TUBA1C,CTSA,LYN,YES1,PIK3CB,CD4,PDIA3,HSPA5,MAP3K8,LCP2,PRKCQ,INPP5D,CYBA,PTPRC,NCF4,CLTC,HCST,UBR4,DNM2,KLHL2,TRIP12,SYK,LNPEP,BTK,PPP2CB,STIM1,AREL1,CTSC,RASGRP3,HECTD1,KIF5B,TUBB1,TUBB4B,AP2B1,YWHAZ,UBE2E1,MYLIP,FYN,CTSH,LTN1,YWHAB,MALT1,PPP2R5A,PJA2,WWP1,WSB1,RNF130,NFATC3,UBE2Q1,AP1G1,ITPR2,FBXL4,SOS1,ITCH,PIK3R1,UBE2Q2,IC…	7.EMPP	NormalvsGATA1s	3071
KIM_ALL_DISORDERS_DURATION_CORR_DN	5.84125	8.49312001725799e-26	2.8676769940624e-24	143	IMPDH2,TUFM,SUMO3,VPS28,PUF60,AKR1A1,TPI1,GRHPR,EIF3G,CCT7,RUVBL2,CTDNEP1,RNH1,RPL13,BCAP31,MARCKSL1,TALDO1,RPS8,TRAP1,PES1,EIF6,VPS51,RNPS1,DHPS,CLTA,OS9,SPAG7,NIPSNAP1,ARRB2,PSMB5,HAX1,RABAC1,DPF2,NDUFAF3,SLC25A11,ECSIT,PMP22,ECI1,PIN1,CDIPT,SNRPA,NUP93,ATP6AP1,ESYT1,PARP1,NDUFC1,NBL1,ATP6V0B,TMEM147,NDUFA7,NELFE,DCTN2,MAL,PEF1,NUDC,NDUFS7,COX8A,NTHL1,ATOX1,UQCRQ,HCFC1R1,AKR1B1,NDUFS8,ENDOG,GAB…	5.EryP	NormalvsTrisomy21	2839
ACEVEDO_LIVER_TUMOR_VS_NORMAL_ADJACENT_TISSUE_UP	5.84095	1.79294871800809e-32	8.46771097074453e-31	832	RPS4X,TMEM14C,RPLP0,CCT8,TUBA1C,AHCY,SERP1,RPS5,LAMTOR1,C12orf57,VPS28,SERPINB1,STXBP6,EIF3F,RUVBL2,RPS7,TAGLN2,PSMG1,RPL30,CSTB,TUBB4B,TRIB2,HSP90AB1,OXA1L,APEX1,ILF2,RPL36AL,RPL35A,UBE2S,MAP2K2,MYDGF,ODC1,C1QBP,EXOSC5,CD59,MRPS18B,BTF3,PPP1CA,SDHC,S1PR1,ATP6V0C,NAA80,ATP6V0E1,IFRD2,HSD17B8,SNRPB,RPS13,HLA-B,MICOS13,UBB,NHP2,RPS27A,PSMB5,USP11,HAX1,YIF1B,PGK1,RPL10A,XRCC6,MAN2B1,CYBC1,COA4,UFC1,…	5.EryP	NormalvsTrisomy21	2838
MARTENS_BOUND_BY_PML_RARA_FUSION	5.84062	7.28246527700605e-32	4.93949758470383e-30	439	CHD7,SPN,APLP2,ZBTB16,TESC,STK24,FOSB,TYROBP,TUBA1C,LYN,SLC7A5,LCP2,RUNX1,GSE1,CD164,STXBP2,DNM2,MYO1F,PREX1,ABHD2,SMAD3,NFE2,MYH9,PSAP,PDE4DIP,GALC,CCND3,CTCF,APBB1IP,SREBF1,B4GALT1,KLF2,C15orf39,GBE1,PRKCD,F11R,EDRF1,OAZ1,WDR26,ITPR2,ANXA11,FERMT3,SQSTM1,PLEKHA2,AUH,PLEK,CD58,ANKRD11,ZMIZ1,LASP1,DNAJB12,ITPR1,MBD6,SMG6,LMBR1,FAM53B,MBP,DCTN1,C11orf21,DOK3,KRI1,WDR81,ARID2,ELF4,RAP1GAP2,DDX5,BAB…	7.EMPP	NormalvsGATA1s	3070
STARK_PREFRONTAL_CORTEX_22Q11_DELETION_DN	5.84061	3.8579810056564e-32	2.07109742907972e-30	511	GP1BB,TLN1,ALDOA,MRPS12,S100A6,LAMTOR1,DYNLRB1,PPP1CA,EIF4G2,ATP5F1E,UBAC1,SERF2,KANTR,GLG1,NAA38,PET100,AP2M1,TANGO2,CHMP4B,BCAP29,NDUFB2,FKBP2,FN3K,SRA1,UBL4A,SMYD2,ATP5MF,MYL4,UFD1,NFU1,NDUFS4,OGFRL1,POLR2J,KPNA1,MRPL41,COX5B,TST,HMOX2,CNDP2,LAMTOR2,TBC1D9B,TMEM165,ATP6V1E1,HAGH,RNF34,THOC7,DPM2,ZSWIM7,PURA,CFDP1,ATP5IF1,BCAP31,DTNBP1,MPC2,ALAD,MKKS,DENR,NR1H2,KRTCAP2,ARHGAP35,VPS13A,RMND5B,ST…	6.EryMeg	Trisomy21vsGATA1s	3049
BLALOCK_ALZHEIMERS_DISEASE_UP	5.84044	1e-50	1.73279069767442e-48	1615	TGFB1,IL2RG,ASAH1,ARHGAP6,GYPB,FLNA,ZFP36L1,S100A4,LDLRAD4,RUFY1,MLC1,PTTG1IP,MAX,PRMT2,ATP6V0E1,CCND3,CD164,ARPC1B,CLIC1,GPSM3,NID1,MYCN,TXNIP,PTGS1,ARMC8,UROD,LAT2,SERPING1,LMNA,TMBIM1,PECAM1,CD84,IQGAP1,RHOBTB3,SNTA1,PIM1,ANXA1,TMBIM6,ZBTB16,KLF2,C15orf39,IER2,ITGA6,C21orf91,CTDSPL,AKR1C1,RNPEPL1,GPC4,CLIP2,HMGN3,LRP10,LPP,RIN3,LRRFIP2,SLC25A21,CMTM6,CSK,ZFP36,STOM,CDIP1,DAZAP2,CTSH,COMT,TSC22…	6.EryMeg	NormalvsGATA1s	3158
DURCHDEWALD_SKIN_CARCINOGENESIS_DN	5.83913	6.36664493971294e-30	2.36262709479198e-28	258	KLF6,APLP2,MACF1,PTBP3,ATP2C1,ELL2,YWHAZ,CSRNP1,SMG1,PIP5K1B,RANBP9,ITGB1,MYH9,DDX6,CPEB4,CTNND1,B4GALT1,MAGED2,PIK3CB,AFF4,FOS,QKI,CCNY,RBM25,PIAS1,UBAP1,MBOAT1,SMURF1,NET1,PTPN12,TIPARP,STX11,MAPK6,TPP1,DLG1,ATF7IP,CCDC88A,RAB11FIP1,ABCC1,DIP2B,MED13,GSK3B,ARNT,MAP4K4,RIPK1,PFN1,PLD1,STK3,PXK,CLIP1,NPLOC4,USF3,DDX3X,AHCYL2,RNF38,ARID3A,KIF5B,SNX9,SEMA4D,KDM5B,LXN,CREBBP,TAOK1,HIPK3,SEMA3C,ATP13…	5.EryP	Trisomy21vsGATA1s	3627
KIM_WT1_TARGETS_DN	5.83744	1.64038400139627e-31	8.1581764336108e-30	454	DLC1,STAM,SGMS1,ASAH1,SEMA3C,ZMYND8,ITGB1,NEAT1,HSPA5,SPN,IGF2BP3,MAP4K3,ACTR2,NET1,RSRP1,ATF2,CDC14A,NCOA2,DNAJB6,GLS,CENPC,ELOVL6,RBM25,DENND4C,ZNF292,BAZ2B,KLHL2,CITED2,RAB6A,EIF2AK3,NFATC3,MED21,ABCD3,PPM1B,USP33,ACAP2,PIKFYVE,PDE4DIP,SGK3,PPP2R5C,CEP350,TBPL1,TMEM165,ASCC3,ANKRD12,SLC5A3,LARP4,ARL4A,YEATS2,KDM3A,PRIM2,TUBGCP3,XYLT1,DAAM1,PLA2G4A,CPOX,SLC33A1,AGAP1,RAP2B,PPM1A,STK17B,VPS13C,M…	7.EMPP	Trisomy21vsGATA1s	3178
JIANG_MELANOMA_TRM3_CD8	5.83724	3.78992606785298e-34	1.84690776221646e-32	419	CTSW,IL2RG,ITM2A,TMSB4X,S100A11,CD63,HLA-B,ZFP36L1,BSG,B2M,PLP2,HERPUD1,HSPA5,MIR4435-2HG,LIMS1,OAZ1,PDIA3,CYB5R3,HLA-A,S100A4,IQGAP1,TALDO1,TRAPPC1,SH3BGRL3,STAT1,ARPC2,ARPC3,RILPL2,LAPTM5,HMGN1,CALR,HLA-C,CLIC1,LMNA,PIM3,ALDOA,PPP1CA,LGALS1,FKBP5,TPM3,CTSD,GMFG,CD7,PFN1,SP100,LY6E,ATP2B1,PKM,CAPZB,RALA,PPIB,TAX1BP1,IFI27L2,CDK2AP2,LINC00649,MYL6,ARPC5,PDIA6,CDKN2A,CTSC,CYTOR,UBC,TMSB10,RALY,PGK…	5.EryP	NormalvsGATA1s	3592
NUYTTEN_NIPP1_TARGETS_UP	5.8369	2.53049048874256e-38	1.39814285596524e-36	721	KLF6,IL1RAP,CHD7,ARMC8,RABGAP1L,ARPP21,ELL2,STAT1,CDC42SE2,YWHAZ,PDGFC,TAB2,RPS6KC1,GNAQ,EPHA3,GLS,NUMB,SP100,ARHGAP12,QKI,TNIK,RBM25,PTP4A2,PLEKHB2,SERPINE1,CEP170,RSU1,TEC,ESCO1,PDK1,PTPN12,ZC3HAV1,BEX1,ATF3,PTPN1,CCDC88A,AKIRIN2,TANK,TCF12,MLF1,CDC14A,DUSP1,MOB1A,TNRC6B,KDM4C,FAR1,CALCOCO2,OGT,MACC1,PLD1,SMURF2,VPS13B,JPT1,NREP,PAFAH1B2,BIRC2,TENT2,SNX9,PAFAH1B1,ATL2,FAM3C,FYTTD1,KDM3A,TMEM64,…	5.EryP	Trisomy21vsGATA1s	3626
REACTOME_PLATELET_ACTIVATION_SIGNALING_AND_AGGREGATION	5.83564	1.22183774180583e-30	5.08939787871747e-29	260	TGFB1,ITGA2B,GP9,TIMP1,LAT,GP1BB,CTSW,FLNA,TLN1,TMSB4X,STXBP2,CD63,APLP2,GNAI2,TAGLN2,ACTN1,PTPN6,MPL,PRKCB,HSPA5,PSAP,VCL,TRPC6,SERPING1,RHOB,MAGED2,CD9,ABCC4,FCER1G,ALDOA,FERMT3,SERPINE1,GNA15,LCP2,PFN1,GNB3,APBB1IP,LYN,RAC2,SYK,PIK3CB,WDR1,PRKCQ,CSK,PIK3R1,PRKCD,ANXA5,GNB4,P2RY1,PECAM1,GP1BA,PIK3R5,RASGRP2,PROS1,PTPN1,GNG2,LAMP2,RAPGEF4,PHACTR2,GNAQ,ARRB1,RAC1,PTPN11,GNB1,AKT1,STXBP3,RHOA,VTI1…	5.EryP	NormalvsGATA1s	3591
BASAKI_YBX1_TARGETS_DN	5.8302	5.66092753853771e-32	2.33286511104712e-30	383	MEIS2,MALAT1,TP53INP1,CD55,NEAT1,MBOAT2,TFPI,TRPC6,YPEL5,DNAJC3,ATP2C1,DHRS3,SEPTIN6,TFDP2,SLC25A36,PTEN,SPRY1,PTGS1,C2orf88,VMP1,RBM39,RNASET2,MYEF2,LAMP2,FOS,MCL1,BAZ2B,IRF2BP2,PIAS1,CRYM,NET1,SF3B1,CHD2,ZBTB20,PDK1,MKLN1,SECISBP2L,RICTOR,BRWD1,ZMYM2,GABARAPL1,IER2,PIK3R1,JAK3,FRRS1,HELZ,VPS13B,NREP,SMCHD1,RALGPS2,PRKD1,CCDC50,FAM3C,KANSL1L,KLHL24,TM9SF3,MEGF9,CDK12,GBE1,PLCG2,PROS1,ZNF207,EIF5…	5.EryP	Trisomy21vsGATA1s	3625
GRAESSMANN_APOPTOSIS_BY_DOXORUBICIN_UP	5.82835	4.60893642499499e-50	7.15441360471618e-48	1112	PDLIM1,PDLIM5,ITGA2B,CAPN1,EMP3,SPNS1,GLUL,NCOA4,SH3BGRL3,CITED2,JPT1,GSN,TMBIM1,PNPLA2,CXXC5,ATP6V0C,ITGA6,C21orf91,PDCD10,NR4A1,CD68,ALOX12,NBEAL2,NAPA,PDLIM7,NINJ2,ZFP36,FUCA1,ROGDI,ZMAT3,ZNF385A,HIGD1A,TWF2,FOSB,PPIF,PRKCD,F11R,ATP6V0D1,THBS1,FOS,TCIRG1,MAN2B1,USP20,UBE2F,CROT,CIRBP,TP53INP1,BCAP31,ZFYVE21,STAT1,TSPAN33,DNM2,SP100,JAK3,DRAP1,CPEB4,SEPHS2,ARPP21,CCS,TUBB4B,CSF1,WIPI1,YPEL5,ACA…	6.EryMeg	NormalvsGATA1s	3157
NUYTTEN_NIPP1_TARGETS_DN	5.82569	4.12237379352019e-41	2.72003708004306e-39	825	TGFB1,DLC1,PTTG1IP,LIMD2,TXNIP,GNAI2,AHNAK,PLP2,ATP2A3,INF2,VCL,PRMT2,LAMA5,DHRS3,S100A10,KLF2,GNAS,LPP,SH3BGRL3,PNPLA2,CTSZ,PACSIN2,TENT5C,TUBB4B,BMP2K,CXXC5,ORAI2,CDKN1C,EHBP1L1,PRKAR1A,SPTLC2,PAK2,P4HB,LRP10,KLF11,EIF4G2,PREX1,STK10,SLC40A1,MBOAT2,TLE5,PIR,ABCA1,JUP,RAC2,PDXK,SYK,CDK2AP2,MALT1,MYL6,SERPINH1,FAM89B,CMTM6,SEC14L1,B4GALT1,MYO1D,XK,PBXIP1,TCF3,SEL1L,GTDC1,CMPK1,SYNE2,MAFF,CTHRC1,D…	5.EryP	NormalvsGATA1s	3590
KEGG_LYSOSOME	5.82496	8.48774736821811e-29	3.1484897700216e-27	119	CTSW,ASAH1,CD63,CD164,PSAP,CTSA,MAN2B1,ATP6V0C,LAPTM5,LAMP1,CTSZ,CTSH,CTSD,CD68,HEXA,AP1S2,ATP6AP1,ATP6V0B,CTSC,ATP6V0D1,GGA1,AP3B1,CTSS,FUCA1,TPP1,AGA,GNPTAB,M6PR,CTSB,GALC,LAMP2,TCIRG1,IDS,AP3S1,LAPTM4A,CLTC,SUMF1,GLB1,CLTB,GUSB,HGSNAT,CLN5,GNPTG,CTSV,CLN3,CTNS,NEU1,ACP2,SLC11A1,GGA3,CTSL,NPC1,AP1M1,AP1S1,SMPD1,GLA,AP1G1,NAGPA,MCOLN1,NAGLU,ATP6V1H,NAGA,PLA2G15,ARSA,LGMN,IGF2R,AP3D1,ATP6V0D2,ARS…	5.EryP	NormalvsGATA1s	3589
REACTOME_HEMOSTASIS	5.82413	2.65800568666819e-34	1.94425298315994e-32	634	ITGA2B,GP9,CARMIL1,GATA1,LAT,TGFB1,VCL,CD36,ABCC4,FLNA,TRPC6,ACTN1,CTSW,SPN,APLP2,KIFAP3,GYPB,GNAQ,GP1BB,CD84,HBG2,PRKCB,ITGB1,PRKAR2B,TIMP1,TUBA1C,LYN,GLG1,YES1,PIK3CB,SLC7A5,RCOR1,TLN1,HSPA5,LCP2,PROS1,PRKCQ,INPP5D,STXBP2,WDR1,ANGPT1,TFPI,SLC16A3,S100A10,ITGA6,NFE2,SYK,PSAP,PPP2CB,STIM1,DOK2,GNG2,PTPN1,CD9,APBB1IP,JAK2,KIF5B,ATP2A3,SERPING1,RHOB,TUBB1,PECAM1,BSG,TUBB4B,P2RY1,MMRN1,GP1BA,YWHAZ,P…	7.EMPP	NormalvsGATA1s	3069
REACTOME_CELLULAR_RESPONSES_TO_STIMULI	5.82272	2.22480930591317e-36	1.80427198167589e-34	750	BACH1,MEF2C,DNAJB6,TUBA1C,MAP4K4,TXNIP,MAP3K5,DNAJC3,TLN1,HSPA5,CITED2,MT-CO1,NCOA1,CYBA,NCF4,LMNA,TNIK,ATP6V0E1,MAP2K4,NCOR1,VCP,DCP2,HERPUD1,GCLC,MT-CO2,IGFBP7,ADD1,FKBP5,DNAJA1,E2F3,CREB3L2,TUBB1,CDKN2A,TUBB4B,ETS2,PRKCD,UBE2E1,NCOA2,CLEC1B,ARNT,CDKN2D,CREBBP,TXNRD1,P4HB,SERPINH1,SQSTM1,NPLOC4,HSP90B1,TFDP2,STAT3,TCIRG1,SIRT1,ATP6V1H,ERN1,CCS,SULT1A3,BCL2L1,YME1L1,NFYC,CAPZA1,EP300,CAPZB,ATP6V…	7.EMPP	NormalvsGATA1s	3068
REACTOME_SIGNALING_BY_ROBO_RECEPTORS	5.82106	1.46083543055796e-26	5.21567176211651e-25	218	RPS4X,RPS26,RPL7A,RPL12,RPS3,RPS14,RPL18A,RPL10,RPLP0,RPL19,RPL6,RPL28,RPL29,RPL8,RPS5,RPS2,RPL18,RPS12,RBM8A,RPL11,RPS15,PABPC1,RPL22L1,RPL41,RPS28,RPS7,RPL3,RPL13,RPSA,RPL32,RPL30,RPL5,RPLP1,RPS8,PSMF1,CXCR4,RPL36AL,RPL35A,RPL36,PSMD8,RNPS1,PSMC5,PSMB8,RPS13,RPS24,RPS3A,UBB,RPS27A,PSMB5,FAU,RPL10A,RPL24,PSMD13,PSMD3,PFN1,RPS15A,PSMA7,PSMD7,PSME2,EIF4A3,RPS21,EVL,EIF4G1,PSME1,PSMD6,RPS19,ELOB,RP…	5.EryP	NormalvsTrisomy21	2837
REN_ALVEOLAR_RHABDOMYOSARCOMA_DN	5.82055	2.89610441314892e-31	1.86274439883656e-29	407	PDLIM5,TGFB1,ACTN1,ELL2,APLP2,ANXA1,TIMP1,MSN,TPST2,SEMA3C,TLN1,LPP,CST3,OSBPL3,CD151,IQGAP1,WDR1,ATP6V0E1,NPTN,ACTR2,JAK1,SMAD3,S100A10,REEP5,ATG5,MYH9,CMTM6,TGFBR2,IGFBP7,DCBLD2,MBNL1,B4GALT1,KLF2,RHOC,CREB3L2,GSN,NDEL1,PDGFC,SLC10A3,GNAI2,AMMECR1,NUCB1,P4HB,TMOD3,MMP14,ABHD5,LXN,MAN2A1,ANXA2,CAP1,CDR2,MFSD1,CAPZB,ANO10,GRN,ATP6V0D1,ACTN4,SSH1,PLEKHB2,EHD1,TMEM50A,THBS1,RAB5C,FNDC3B,GRAMD2B,STA…	7.EMPP	NormalvsGATA1s	3067
KEGG_UBIQUITIN_MEDIATED_PROTEOLYSIS	5.81153	1.19437737870298e-28	3.95949371899802e-27	132	HERC2,PRKN,ITCH,UBE2H,UBE2Q1,PIAS1,TRIP12,CUL3,SMURF1,UBA6,TRAF6,HUWE1,FBXW7,BIRC6,SIAH1,WWP1,UBE2E1,HERC1,SMURF2,COP1,UBE2W,BIRC2,MGRN1,SYVN1,NEDD4L,FBXW11,MAP3K1,UBE2K,MID1,UBE2Q2,UBE2G1,UBR5,UBE2J1,FZR1,CBL,WWP2,UBE2A,ANAPC11,UBE3A,ANAPC10,UBE2D1,MDM2,UBE4B,UBE4A,CBLB,UBE2B,CUL4A,UBE2E3,BIRC3,XIAP,UBE2D3,BTRC,SOCS3,HERC3,PIAS2,CDC16,CUL5,NEDD4,CUL2,UBE2G2,HERC4,UBE2D2,UBA7,UBE2L3,PPIL2,UBE2Z,F…	5.EryP	Trisomy21vsGATA1s	3624
MOOTHA_MITOCHONDRIA	5.81115	1.04725496844009e-28	4.39023403061797e-27	442	ATP5PO,SLC25A5,CYB5R3,ATP5F1B,OXA1L,SHMT2,APP,ATP5PF,TUFM,ATP5MC2,SLC25A3,BCKDHA,UQCRC1,MRPS2,MDH2,MRPL57,RAN,CYBA,PMPCB,NDUFS2,FPGS,SDHC,ACAA1,CNOT7,IMP3,FARSA,TOMM22,NME2,UCP2,NDUFB8,MRPS7,G6PD,FDX1,GNAS,TNFSF10,ATP5F1D,MRPL3,NDUFC1,PRDX3,MRPL9,IDH2,FIBP,CAT,NDUFAB1,TFAM,HADHB,PIN4,ATP5PB,GLUD1,DECR1,ETFA,MRPL17,MRPS27,SDHD,COX5A,TXN2,TOMM34,ATP5F1C,ECHS1,MTHFD2,CYC1,NDUFS3,NDUFB3,NDUFB5,MRPL34…	6.EryMeg	NormalvsTrisomy21	3007
BRUINS_UVC_RESPONSE_LATE	5.80934	5.3229523336026e-42	5.84037461191309e-40	1104	STXBP5,PLXDC2,RUFY1,KIFAP3,CD55,PPP1R12A,LRRFIP2,ANXA1,RAB10,TLN1,ATXN7,CITED2,PDCD10,NBAS,RAB2A,NID1,OSBPL3,GPC4,ARHGEF7,PACSIN2,RSRC1,FADS2,BCAS3,CMIP,TANK,MEG3,CPQ,SLC44A1,CAPN1,FER,ZFAND6,NUDT4,TGFBR2,JAK2,DCBLD2,B4GALT1,STAM2,RHOB,MAP4,RALA,USP47,YWHAB,AHNAK,P4HB,MFAP3L,LMTK2,ITPR2,SIL1,AKAP8L,LRRC8D,GTF2E2,ABHD5,SOS1,CCNL2,DYRK1A,SQSTM1,ATP2B1,ICAM5,IL15,RNF38,TMBIM6,ZNF326,BMPR2,ODF2L,ATP6…	7.EMPP	NormalvsGATA1s	3066
TIEN_INTESTINE_PROBIOTICS_24HR_UP	5.80885	8.12974881186984e-33	4.30127135720206e-31	550	SGMS1,ACTN1,ASAH1,DCAF6,MAP4K4,ATP2C1,GLUL,PACSIN2,AREL1,ZC3HAV1,PICALM,USP14,NPTN,PSMD1,TOP2B,AMMECR1,PLEKHB2,REEP5,DAG1,ABCD3,GALNT1,SAR1A,DHX9,WASHC2C,CPSF6,TPM1,TGOLN2,MPZL1,OPA1,NSF,ATP6V0E1,ATP13A3,SPAST,HIGD1A,ZFYVE16,LARP4,SMARCA5,ADAR,DNAJA1,NUP93,CUL2,SMYD2,UBAC1,DICER1,CDC42,PAFAH1B1,DNMT1,LGR4,CMTM6,HMGN3,ARF3,GGA2,G3BP1,RP2,TMEM50A,HIBCH,SLC25A13,TUBB2A,CXADR,PIK3R4,SMC4,CELF1,RBM14,…	7.EMPP	Trisomy21vsGATA1s	3177
REACTOME_SIGNALING_BY_RHO_GTPASES_MIRO_GTPASES_AND_RHOBTB3	5.8079	7.80389125835953e-40	4.88956413633014e-38	652	DLC1,CYBA,FLNA,DBN1,TUBA1C,NCF4,RHOBTB3,ACTN1,ARHGAP6,PRKCB,ACTR2,ARPC1B,FMNL1,LAMTOR1,RHOB,IQGAP1,VCP,ARPC2,ARPC3,CDC37,STAM,PLEKHG1,RHOC,FLOT2,GMIP,TPM3,ESYT1,TUBB4B,NCKAP1L,ARHGDIB,FGD4,PFN1,ARHGAP21,ARHGAP4,PAK2,WASF2,NET1,SHKBP1,MYH9,CAPZB,ARHGDIA,ATP6AP1,PREX1,STK10,FNBP1L,ITSN1,PKN1,JUP,RAC2,ARHGEF7,ARHGAP10,ARHGEF1,MAP3K11,MYL6,TAOK3,ARPC5,YWHAH,ARHGAP12,JAG1,CTNNB1,CSK,PIK3R1,BCAP31,AKAP…	5.EryP	NormalvsGATA1s	3588
ZHANG_BREAST_CANCER_PROGENITORS_UP	5.80765	5.55291543557776e-30	2.52589933837866e-28	427	AUTS2,LRBA,TNIK,ZFAND6,TRAPPC10,PDZD8,PDK1,ACSL3,PACSIN2,SMCHD1,C21orf91,TMEM117,LCORL,USP34,NOL4L,CDC73,TAX1BP1,CD2AP,ZNF148,WDR11,SETX,CEP192,G3BP2,PPM1B,ITGA6,ADK,CPSF6,TFRC,MPZL1,RIF1,EZH2,PHF6,HNRNPA2B1,TAF2,TASP1,BCAP29,SMARCA5,DNAJA1,KANSL1L,STRBP,SLC20A2,PDS5B,PSPC1,RPRD2,PPIP5K2,AKAP9,CAPZA2,TCEA1,TRRAP,ACTR3B,NRAS,CTDSPL2,SBNO1,CTCF,VPS54,FAM199X,LRRC40,CAPRIN1,POLA1,PRR14L,SMC4,POLR2B,…	7.EMPP	Trisomy21vsGATA1s	3176
WELCSH_BRCA1_TARGETS_UP	5.80763	1.26751203873035e-28	5.83837952654682e-27	191	LIMS1,B2M,MEF2C,MYL12A,CD9,NID1,IQGAP1,CYBA,KIFAP3,RHOC,TMBIM6,HSPA5,ANXA5,CITED2,STAT1,JAK1,PRKAR1A,CD46,KIF2A,HMGN3,BNIP3,RAB8A,ADD1,GPS2,RDX,RAB2A,RRAS,TSG101,RAB6A,PLD3,RAB5B,RAB7A,NPEPPS,ZNF267,ATP6V0A1,PTPN1,PPP4C,TM9SF2,CLTB,WWP1,ANXA7,HAGH,MAP2K1,ABCD3,NFYC,TAF12,EXOC5,HMGCL,ATXN10,HMGN4,VAMP3,MAP2K4,PPP2R5C,ANXA1,CSNK1A1,ACTR1B,SMC1A,KIF5B,ANXA2,CD47,RAB1A,ECH1,NEU1,TXNDC9,CTSL,PAM,TRAM1…	6.EryMeg	Trisomy21vsGATA1s	3048
WAKABAYASHI_ADIPOGENESIS_PPARG_RXRA_BOUND_8D	5.80697	3.54765511011777e-42	3.47810239809046e-40	830	DLC1,ASAH1,CST3,CD36,CD151,PTTG1IP,GNAI2,LTC4S,PTPN6,PFKL,NID1,TXNIP,ARMC8,TALDO1,LMNA,GSN,RPN1,ANXA1,FADS2,PNPLA2,ATP6V0C,YWHAB,DYNLRB1,ZMYND8,REEP5,EHBP1L1,POLD4,STOM,ESYT1,HNRNPF,MGAT4B,ATP5PF,LUZP1,GAPDH,HSPA5,MBD6,ABCC4,CRYZL1,KLF11,ECH1,FTH1,STAT6,ZFYVE21,STAT1,ACADS,HSD17B12,BMP2K,STAT5A,AGPAT2,RNFT1,TUBB4B,VPS26C,PTBP1,ZBTB38,MOCS2,YPEL5,AP3S1,ETFRF1,NET1,MYLK,SERPINE1,ETFA,TMEM87A,LDHB,P…	6.EryMeg	NormalvsGATA1s	3156
GINESTIER_BREAST_CANCER_ZNF217_AMPLIFIED_DN	5.80677	3.17826937325987e-29	1.51058892122708e-27	326	TLN1,LMNA,CYBA,CDC42SE1,TSPAN14,SLC39A3,LIMD2,PBX2,CTNND1,FURIN,KHSRP,TICAM1,HDAC10,SH3BP1,SRRM2,B4GALT1,INTS1,PTBP1,RNF181,GGA1,PHPT1,MARK2,STK11,TNPO3,LPAR2,PABPN1,AP5Z1,DCAF8,RAP1GAP2,MEF2D,GRIPAP1,LSM14B,RASSF7,ZBTB7B,ABCA7,GATAD2A,TCHP,SGSM3,SH3BP2,PHKG2,ACIN1,CIC,TMEM63A,BRD1,PRRC2A,PHF21A,ZNF524,REXO1,MINK1,DOT1L,APBA3,DCLRE1C,ZNF638,PPP6R2,LENG8,CAPN15,ZMIZ2,ZBTB5,TRAF2,TNK2,PPP1R12C,TECP…	6.EryMeg	Trisomy21vsGATA1s	3047
PARENT_MTOR_SIGNALING_UP	5.80603	3.21597189998879e-36	1.7127347490226e-34	548	CD63,EPB41L4A,PTPN6,PDE4DIP,GNAS,IQGAP1,STAT1,CITED2,TSC22D3,ATP6V0E1,TFPI,DNAJC3,NCKAP1L,PRKAR1A,BNIP3L,GLG1,MFSD10,ZMYND8,TBC1D9B,TMBIM6,MYO1D,PTPRA,CTNNB1,SYNE2,AKAP13,CTDP1,PIP5K1C,FARP1,SKAP2,CNNM2,AP3B1,PRKD1,BCAS3,CHD4,YIPF3,BRWD1,CPQ,SULT1A2,MYO9B,NADSYN1,PECAM1,NSD1,PTBP1,ECHDC2,AKR7A2,TMC6,PDE4A,HDAC6,FLII,DIP2A,CTDNEP1,TCF25,GRHPR,RAB5B,MSH3,HECTD3,KLF3,POLG,ARRB1,EXOC3,PDK3,CPSF1,EVL,…	5.EryP	NormalvsGATA1s	3587
IVANOVA_HEMATOPOIESIS_MATURE_CELL	5.80572	7.55216612422134e-29	4.33436241944734e-27	289	RHAG,MTSS1,KEL,SLC40A1,LIMS1,FYB1,ANKRD9,SLC22A23,PIK3CB,CPEB4,FBXO34,BMP2K,SPECC1,SPTA1,USP25,SYAP1,SYNJ1,AGFG1,CCND3,GPCPD1,NUDT4,TENT5C,ADD1,EHBP1L1,HECTD1,SNCA,KLF11,YPEL5,CDKN2D,CTSH,WDR26,LMTK2,TFDP2,STX11,NOCT,GYPA,RNF19A,CDR2,TMCC1,BNIP3L,SDCBP,ANO10,PICALM,UBAC1,THBS1,RAB6A,STK17B,RBMS1,LAMP1,TMEM9B,MKRN1,GOLIM4,WIPI1,CMAS,CPD,DAAM1,AAK1,LNPK,SNX13,RELCH,ABCB6,SPTB,HERPUD2,HGSNAT,PPP3R1,…	7.EMPP	NormalvsGATA1s	3065
WEI_MYCN_TARGETS_WITH_E_BOX	5.80464	2.37506144971455e-37	1.62550077200647e-35	767	ABCC4,LYN,TOP1,GPD2,DCBLD2,RC3H1,WDR1,GLS,USP14,PSMD1,JPT1,DNAJB11,E2F3,HPS1,ARNT,ATP2B1,GRB2,AHCTF1,ATP2A2,ITGA6,DHX9,HS2ST1,TFRC,MPZL1,TNPO3,RIF1,OPA1,MRPS12,UBQLN1,ATP6V0E1,ATP13A3,DIAPH1,MAN1A2,ATL2,ASCC3,UPF2,IDE,LARP4,ZNF267,ZBTB38,VCP,SSX2IP,EIF4G1,PRIM2,CCND2,THUMPD2,GRB10,HLCS,KPNA6,CA2,TAF4B,LRRC58,HDAC8,PSMD14,EHD4,CDC42,DNMT1,PKNOX1,CD58,G2E3,SBNO1,CMSS1,PSMD12,PRMT3,ANXA2,GGA2,EIF5B,…	7.EMPP	Trisomy21vsGATA1s	3175
CHANDRAN_METASTASIS_UP	5.80314	2.68108318122108e-27	1.04716651999525e-25	199	PDLIM5,KMT2C,LYN,ZFP36L1,ZMYND8,MALAT1,DNAJC3,NEAT1,MAP4K4,AIG1,EPB41,SMG1,CPEB4,DDX17,PDK1,SLC7A5,KANSL1,POLR2A,JPT1,NSD1,AP2B1,E2F3,ITPR1,TAOK1,ADAM10,EML4,ZNF148,GPATCH2L,GRB2,NORAD,WNK1,ABHD5,PPP2R5C,ADD1,TMCC1,GSK3B,GABPB1-AS1,IBTK,ZFYVE16,SEL1L,ZBTB7A,RBM39,EP400,CDKN2D,ATXN2,LRRC58,P4HA1,G3BP1,CELF1,PVT1,SPIN1,LRCH3,TM2D1,RALA,LARP1,HSPA1A,ADAM17,NFATC2IP,SULT1A2,DYNC1H1,FAM30A,RAB12,GRAMD…	7.EMPP	Trisomy21vsGATA1s	3174
PID_PDGFRB_PATHWAY	5.80034	1.58649505476668e-28	5.19020465504591e-27	127	ACTR2,YES1,IQGAP1,LYN,STAT1,YWHAZ,ARPC2,PTEN,PIK3CA,WASF2,STAT5A,ABI1,PIK3CB,BRAF,FOS,ARPC1B,STAT5B,USP6NL,ARPC3,YWHAG,MAP2K4,KRAS,PTPN1,DNM2,WASL,MAP2K1,PIK3R1,MAPK8,PRKCD,YWHAH,NCK1,MAPK1,CSK,ITGAV,JAK2,RAP1A,STAT3,NRAS,GRB2,PTPN11,RAC1,ARPC4,ARPC5,CBL,PIK3R5,ABL1,ACTR3,ARHGDIA,ARAP1,EIF2AK2,PPP2CA,PTPN2,ARHGAP35,YWHAE,ELK1,JUN,FYN,RAF1,SIPA1,RASA1,RHOA,RAB5A,ACTN4,SHC1,GAB1,PIK3R2,PLA2G4A,MAP2…	5.EryP	Trisomy21vsGATA1s	3623
Shastri_STAT3_Targets	5.79981	4.30345587848664e-29	1.47923858975262e-27	149	LINC00534,RABGAP1L,GNAQ,ANKRD11,GLS,HIF1A,AIG1,SETX,QKI,NFKB1,GPATCH2L,KIAA1109,SKAP2,LRRFIP1,CCDC91,FER,CUX1,ARHGAP15,INO80D,MAML3,MAP2K1,PLD1,HERC1,PIK3C2A,EPG5,CDYL,ATF6,AHCYL2,MICU1,SMG6,SPIDR,MON2,ATE1,UBE2K,PCYT1A,KIF1B,STAT3,FAM50A,ARFGEF1,MKNK1,OXSR1,SLC9A8,ANKMY2,RNF168,RASA2,ITPR1,INO80,NLRP1,UTRN,CNTRL,ANAPC10,SS18,VPS13C,MAPRE2,CLEC16A,VPS41,SUSD3,EXT2,NSMCE2,POLB,ABLIM1,DYNC2H1,DNAJC…	5.EryP	Trisomy21vsGATA1s	3622
Shastri_STAT3_Targets	5.79653	7.33416734768108e-27	2.97432373632588e-25	149	LINC00534,AIG1,RABGAP1L,GNAQ,FER,MKNK1,SUSD3,FAM50A,SKAP2,AHCYL2,CDYL,PLD1,KIAA1109,QKI,ANKMY2,SETX,MICU1,RMDN1,GPATCH2L,CCDC91,INO80D,ELP3,ABLIM1,GLS,MAP2K1,DNAJC13,COG4,MAML3,MAPRE2,GUK1,SYCP2L,PCYT1A,UBE2K,OXSR1,ATE1,ANKRD11,STAT3,PIGK,ASCC3,VPS41,EPG5,UNC13B,ENOX2,SS18,SLC9A8,CHURC1,ARHGAP15,CENPP,HIST1H2AH,C12orf4,MAPKAP1,CENPE,PLA2G4A,ARL13B,SMG6,NSMCE2,EXT2,VPS13C,CYP2R1,ITPR1,CNTRL,CLEC16…	6.EryMeg	Trisomy21vsGATA1s	3046
REACTOME_HIV_INFECTION	5.78937	2.12809922414174e-28	9.6828514698449e-27	231	B2M,CD4,FYN,PSMD6,UBC,AP2M1,POLR2L,RAC1,AP1S2,CHMP4B,VPS37A,FURIN,PAK2,TAF10,AP2B1,AP1G1,TSG101,NEDD4L,PSMA7,POLR2J,KPNA1,CHMP2A,VPS28,GTF2B,CHMP4A,CCNK,AP2S1,RNGTT,AP1M1,NMT1,RBX1,TAF12,AP2A2,NUP210,CHMP3,POLR2A,GTF2A1,PSMD1,VPS4B,CHMP6,XRCC4,GTF2H5,CTDP1,DOCK2,SUPT5H,PSMD2,XPO1,PSMD4,PSMB1,AP1S1,MNAT1,PSMA4,ARF1,PSMB2,TAF13,GTF2H2,PSMD11,PDCD6IP,GTF2E2,BANF1,APOBEC3G,UBAP1,PSMD8,PSMA6,PSMD14,HL…	6.EryMeg	Trisomy21vsGATA1s	3045
MITSIADES_RESPONSE_TO_APLIDIN_UP	5.78426	1.25762507352458e-30	6.51694326294474e-29	420	TESC,TIMP1,SLC2A3,LDLRAD4,PIP5K1B,CD84,ATP6V0E1,KLF6,GNAS,BACH1,TNFSF9,JARID2,SMAD3,SQSTM1,JAK1,DNAJB6,STOM,USP20,RHOB,TUT7,YES1,KLF2,HERPUD1,PDE3B,FOSB,MAP1LC3B,GADD45B,RBM4,FBXO34,WDR26,TP53TG1,DENND4A,MIR22HG,ATAD2B,BBC3,MKRN1,BCL2L11,NFU1,GAD1,MORC3,RIOK3,STX5,ARF4,IRF7,GTF2B,CHMP4A,TSC22D3,CHST2,PLEKHM1,ATP6V0A1,MBTPS1,F2R,PDE8A,NFE2L2,PPP1R15A,POLR2A,ATF7IP,RBMS1,SNRK,TRAPPC2,NDEL1,C1orf50,…	6.EryMeg	Trisomy21vsGATA1s	3044
REACTOME_INNATE_IMMUNE_SYSTEM	5.78212	1.5688484023192e-34	8.73637819261634e-33	1031	FTH1,PCBP2,EEF2,APRT,IMPDH2,PFKL,SERPINB1,ACTG1,CCT8,GMFG,GSTP1,EEF1A1,FCER1A,ICAM3,PKM,ITGB2,DDOST,CYB5R3,NCF4,LAMTOR1,ATP8B4,HLA-B,APP,LAT2,MAP3K8,TRAPPC1,PSMB8,CTSC,MAN2B1,ARPC1B,MAPKAPK3,FABP5,S100A11,PECAM1,UBE2L6,DYNLT1,UBB,CD81,GSDMD,PPP2R1A,VAT1,SELL,PLAC8,ARPC3,CAPN1,CNN2,NFKBIA,HLA-E,PTPN6,WAS,PIK3R1,HSPA8,RAC2,CSTB,ATP6V1G1,ARPC2,CYBA,ILF2,APEH,CTSD,PSMC5,PSMB5,ACAA1,FTL,ATP6V0E1,IQGAP…	6.EryMeg	NormalvsTrisomy21	3006
WEST_ADRENOCORTICAL_TUMOR_UP	5.78168	9.25010739009964e-29	3.87673040056985e-27	291	RHOBTB3,IGF2BP3,ACTR2,SLC7A5,AREL1,TUBA1C,DNAJB6,USP14,ELOVL6,CD164,RNGTT,TMEM131L,DNAJC6,CAPZA1,PSME4,PLEKHB2,RTN4,TDG,UBE2K,ANKMY2,TNPO3,KIF5B,EZH2,PIR,PRRC2C,ELF4,SUCO,GPR89B,RIOK3,OAZ1,TBK1,DICER1,NNT,PSMD14,ANKHD1,MLF1,NRAS,DNMT1,VPS41,JAG1,SLC7A11,SPTLC1,RPAP3,ARF3,TWF1,ZBTB43,ATP1A1,TUBB2A,CDK8,SMC4,TMEM30A,MAPK6,TNPO1,CDK17,PANK3,PLA2G15,SLC25A24,KPNA3,TMEM41B,MED27,LSS,HSF2,XPO1,DYNC1H1,…	7.EMPP	Trisomy21vsGATA1s	3173
BENPORATH_NANOG_TARGETS	5.78067	4.9157647113979e-38	4.31488476608703e-36	958	ELL2,ASAH1,APLP2,ZFP36L1,DHRS3,SGMS1,EIF4G2,SLC40A1,CA2,MBOAT2,ITGB1,S100A11,ANXA1,RYR3,JARID2,GLG1,AP3B1,SEMA3C,SLC7A5,INF2,HSPA5,JPT1,CITED2,GPC4,GNPTAB,SCAF4,RNF24,PIM2,STXBP2,TRIM24,ANGPT1,DNM2,CDYL,TMEM87A,USP16,NCOR1,SPRY1,ABHD2,SMAD3,DDX17,RIPK1,SLC44A1,ZFAND6,PTPN1,SON,EXOC4,TMEM245,E2F3,F11R,RUNX1T1,NFAT5,ANKMY2,TXNRD1,ECPAS,AP1G1,PTPN2,SERPINH1,ARF3,ZNF217,STAT3,DPH6,PPP2R3C,ODF2L,RABL3…	7.EMPP	NormalvsGATA1s	3064
REACTOME_INTRA_GOLGI_AND_RETROGRADE_GOLGI_TO_ER_TRAFFIC	5.77903	5.78596497164608e-28	2.53969827167194e-26	199	TUBA1C,KIFAP3,RHOBTB3,CAPZB,TUBB1,AGPAT3,NBAS,ARF3,KIF2A,NAA38,VTI1A,TUBB2A,TGOLN2,NAPA,COPE,M6PR,DYNC1I2,RAB1B,SNAP29,CAPZA1,RAB6A,CAPZA2,TUBB4B,TMED7,STX5,ARF4,DCTN1,MAN2A1,DYNC1I1,DYNC1LI2,RAB6B,COG4,DCTN2,NSF,VAMP3,VPS45,ARFGAP1,GBF1,GOLIM4,ARCN1,RAB3GAP2,STX18,TMED9,ARF1,PLIN3,VPS54,ARFRP1,KIF5B,DCTN5,COPA,NAPG,TUBAL3,RAB1A,USP6NL,KLC1,BET1L,RAB18,ARFGAP2,VAMP4,COG5,ARFGAP3,KIF13B,GOLGA5,PLA…	6.EryMeg	Trisomy21vsGATA1s	3043
NUYTTEN_EZH2_TARGETS_DN	5.77688	3.39531357208075e-39	2.48323914193356e-37	988	LAT,IL1RAP,LRP12,DIPK2A,RNF182,ITGB1,SLC40A1,ROCK2,DNAJC3,MAP4K4,AIG1,CD46,ATP2C1,CLASP2,GTDC1,TRAPPC10,GPD2,PDZD8,PJA2,ZNF644,AUH,DCUN1D1,PACSIN2,XK,PPP2R5A,GPCPD1,DCP2,SP100,PHLPP1,MYH9,AP2B1,KLHL2,SLC44A1,ZNF326,CUL3,LARP4B,LXN,EIF2AK1,TBXAS1,HP1BP3,SS18,DIDO1,SLC43A3,CCM2,PPM1B,ITGA6,KIF20B,TMEM41A,DPH6,TFRC,RPS10,TGOLN2,MPZL1,CUX1,CCDC14,OPA1,NSMCE2,FKBP5,EZH2,CCNK,CDR2,SPAST,ZMYM2,METTL15,A…	7.EMPP	Trisomy21vsGATA1s	3172
ROSS_AML_OF_FAB_M7_TYPE	5.77647	2.20993933442945e-26	1.07767041661295e-24	69	RHAG,PDLIM5,ITGA2B,DLC1,DNM3,ANK1,GATA1,LAT,ARMC8,ABCC4,KEL,GP1BB,ZMYND8,RYR3,PDCD10,PROS1,CD164,BMP2K,CAVIN2,NET1,TNIK,FADS2,PTGS1,CTNNBL1,GJA4,GP1BA,MRPS12,TEK,PCDH9,SERPINI1,TPM1,HIGD1A,PCCB,CMAS,RDX,PRUNE1,TFR2,PSMD6,NEO1,ICAM4,TAL1,UROD,RASA1,DNAJC6,APOE,SLC39A4	7.EMPP	NormalvsGATA1s	3063
MARTENS_BOUND_BY_PML_RARA_FUSION	5.77633	1.97205006869443e-30	1.00105017772774e-28	439	TESC,APLP2,TYROBP,TUBA1C,STXBP2,OAZ1,SPN,TAGLN2,STK24,CD164,CHD7,CCND3,SH3BGRL3,PTPN6,ZBTB16,PSAP,CXXC5,FAM89B,SMAD3,LCP2,LYL1,VASP,ELF4,SQSTM1,PRKCD,ABHD2,NFE2,ICAM4,CSK,MYH9,LYN,PLCG2,FERMT3,SEC11A,ATP6V0C,DOK3,KLF2,C15orf39,PREX1,TBXAS1,GSE1,C11orf21,MYO1F,MBD6,ANXA11,SUSD3,FOSB,ECE1,AUH,FGFR1OP2,WDR26,PDE4DIP,APBB1IP,WDR81,LAPTM5,F11R,CETP,PPCDC,PLEK,SLC7A5,BABAM2,FAM53B,DNM2,CD58,RAC2,MBP,PK…	6.EryMeg	Trisomy21vsGATA1s	3042
RODRIGUES_THYROID_CARCINOMA_ANAPLASTIC_DN	5.77345	4.95548368661129e-34	2.25383858648985e-32	528	PDLIM5,ASAH1,NR4A2,ARHGAP6,AGPAT3,GSTP1,MED13L,HSP90B1,NDFIP1,CFH,GNAQ,ATP9B,GNAS,SESN1,ZMIZ1,MEF2C,CYLD,RNASET2,SDF2L1,FOS,ELF2,FKBP5,STAT5B,TPST2,PRKAR1A,FTX,ZBTB20,TENT5C,AKAP13,ARID2,SNRK,BRWD1,RILPL2,SYNE2,SLC66A2,HIGD1A,CREB3L2,FARP1,ARID1B,MAML3,NSD1,CPQ,HERC1,KLF9,NFATC3,HOOK3,KIDINS220,GSN,SH3BGRL2,CCDC92,AHCYL2,RNF38,ZNF711,PNKD,NF1,FOXO1,TMEM64,FAM53B,SULT1A2,NEO1,IGFBP7,TULP4,DCAF8,TR…	5.EryP	Trisomy21vsGATA1s	3621
THUM_SYSTOLIC_HEART_FAILURE_UP	5.77116	3.23149239167181e-32	1.35200060734467e-30	418	MAX,TYROBP,IL2RG,AKR1C1,PTPRC,PLXDC2,DNAJB6,NEAT1,ACTR2,LYZ,BSG,LYN,HSP90B1,KIFAP3,STAT1,YWHAZ,PDGFC,ITGB1,EPHA3,CD46,PDLIM7,GADD45B,GTDC1,PACSIN2,TGFBR2,PRMT2,FCER1G,EZR,PRNP,HP1BP3,ZNF217,LMBR1,DOCK2,CTNNA1,LAPTM5,LAMP1,PDK1,SKAP2,RICTOR,RIOK3,TPP1,MAPKAPK2,MORF4L1,CAVIN2,PPP1R16B,RDX,NORAD,TANK,TBL1XR1,KBTBD2,YTHDF3,CYB5R3,CCNL2,GSN,SELENOT,KPNA4,SLC9A9,CREBRF,ARF1,C6orf62,LXN,JAK2,PTBP2,FBXW1…	5.EryP	Trisomy21vsGATA1s	3620
HALLMARK_MITOTIC_SPINDLE	5.77099	1.89433819719018e-28	6.17024830255088e-27	199	PDLIM5,VCL,FLNA,CLIP2,KIFAP3,EPB41,CDC42,RANBP9,ARHGEF7,MYH9,WASF2,ABI1,EZR,FGD4,CAPZB,NET1,DOCK2,AKAP13,RICTOR,CLASP1,APC,PREX1,DLG1,CCDC88A,WASL,FARP1,PCM1,ITSN1,CD2AP,HOOK3,MYO9B,CLIP1,ARHGAP4,GSN,CDC42BPA,KLC1,KIF5B,SUN2,NUMA1,NF1,NCK1,PAFAH1B1,MARK4,PPP4R2,CSNK1D,ARHGAP5,SSH2,MAP3K11,MID1,KIF1B,ATG4B,ARHGAP10,RAPGEF6,ROCK1,ARFGEF1,HDAC6,RAB3GAP1,STK38L,MAPRE1,RASA2,DYNC1H1,ABL1,ARHGDIA,ARL8A…	5.EryP	Trisomy21vsGATA1s	3619
KRIEG_HYPOXIA_NOT_VIA_KDM3A	5.77061	2.69773300218492e-37	1.40716017225855e-35	717	TGFB1,LAT,KLF6,IL1RAP,FLNA,DNAJB6,PTTG1IP,EMP3,NID1,BACH1,PLP2,PDIA3,RABGEF1,TES,ELL2,JAK1,PDGFC,TAB2,DIPK2A,ADAMTS3,SLC7A5,TP53BP2,SNTA1,SLC25A36,ARHGEF7,SPRY1,CTNNB1,MYH9,NFKBIA,BNIP3L,RNF24,SEC14L1,PDCD10,ALDOA,PNRC1,MPP1,RNASET2,QKI,KDM2A,CCNY,BZW1,PAN3,PTP4A2,NFIL3,SERTAD2,MKRN1,AP1S2,UBA6,STK10,PPTC7,SUSD1,PDK1,MKLN1,TIPARP,RIC1,EHBP1L1,DENND4C,ZMYM2,ZNF292,MTCL1,HIVEP2,MYADM,TICAM1,ZFP91,T…	5.EryP	Trisomy21vsGATA1s	3618
WP_TNFALPHA_SIGNALING	5.76993	9.57179068318187e-28	2.96248907493168e-26	92	CYBA,TAB2,NFKBIA,MAP3K8,REL,NFKB1,PTPRCAP,MAP2K4,KRAS,TANK,MAP2K3,MAPK8,RIPK1,NFKB2,MAP3K5,BIRC2,MAPK1,TNFAIP3,CREBBP,FBXW11,CDC37,MAP3K1,APAF1,CASP8,NRAS,GRB2,RAC1,MAP4K2,IKBKG,OTUD7B,MADD,TBK1,PPP2CA,MAP3K3,JUN,NFKBIE,BIRC3,CASP9,BTRC,CSNK2A1,TNFRSF1A,PYGL,RAF1,DIABLO,PSMD2,NSMAF,CHUK,MAP3K14,RFFL,TAB3,TRAF1,GLUL,BCL2L1,BAX,MAP3K7,CFLAR,MAP2K7,AKT1,IKBKB,CASP7,SOS1,RIPK3,KSR1,SKP1,TRADD,MAPK3,S…	5.EryP	Trisomy21vsGATA1s	3617
YAO_TEMPORAL_RESPONSE_TO_PROGESTERONE_CLUSTER_14	5.76785	2.46122185719198e-25	8.01992903858801e-24	138	TMEM14C,CCT8,RAN,CDK4,PRMT1,MRPL12,APEX1,PES1,CTSD,MYDGF,PKM,ODC1,NME1,MRPS18B,GSTM1,NHP2,PSMB5,RAB34,ARHGDIA,EBNA1BP2,PTOV1,COL18A1,HTRA2,GPS1,SEC61B,TBCB,SSR2,ASL,WDR74,FBL,NUBP1,RPN1,LMAN2,NOP16,EIF4G1,BAX,CLPTM1L,RCN1,CCT3,PSMD6,GORASP2,EFTUD2,HDLBP,IRAK1,GALK1,UBE2M,TMEM147,SND1,IPO4,SMARCA4,SSR3,SEC13,DCTPP1,THOP1,PREP,MRPS10,FKBP11,CARM1,MLEC,P3H4,SMYD2,EIF2B5,ERGIC1,TUBB6,PABPC4,DDX41,PTP…	5.EryP	NormalvsTrisomy21	2836
LINSLEY_MIR16_TARGETS	5.76757	8.92218860417869e-29	3.01133958364565e-27	202	DNAJB6,MACF1,RNH1,CDC42SE2,RHOC,UBE2Q1,SUSD6,SERPINE1,MKRN1,USP15,LCOR,MAP3K2,MAP4,CLASP1,FBXW7,DCP2,AREL1,WWP1,ZFP91,LAPTM4A,CACUL1,SMURF2,CRY2,PHF19,MAPK1,PLEKHM1,CDS2,DYNC1LI2,EFCAB14,MKNK2,TACC1,ELL,SETD3,SLC15A4,CHD9,JUNB,BTG3,UBAC1,ATXN7L3,ZNFX1,ARHGDIA,ZCCHC2,TMEM245,MFN2,GFPT1,TVP23B,NKIRAS1,SFXN5,CDCA4,KLHL15,CDC37L1,BTRC,DAZAP2,UHMK1,ATG9A,RAB22A,ATG16L1,EXT2,SRPRA,M6PR,FOXK1,HSPA1B,RAB…	5.EryP	Trisomy21vsGATA1s	3616
SPIELMAN_LYMPHOBLAST_EUROPEAN_VS_ASIAN_UP	5.76657	8.51892287868845e-34	5.28954119742564e-32	476	S100A11,HERC2,MEIS2,CST3,OAZ1,STXBP2,B2M,HMGN1,ARHGDIB,MYL6,PFN1,PTPN6,CYB5R3,RPN1,SERF2,RHOA,LCP2,CDK2AP2,RAB8A,CALM1,CSK,GALE,ATP5PF,GPX4,TADA3,ARPC4,VASP,TCIRG1,ARHGAP1,RAB1B,MACF1,CNPPD1,BAX,ADGRE5,SCAND1,RALY,UQCRC1,RTN3,PNPLA6,PPIB,APRT,AUP1,NET1,ATP5MF,HSD17B4,HSPA1A,RREB1,PSMD4,CCDC85B,SF3A2,STAT2,SNAP29,BLOC1S1,KHSRP,ACOT8,NDUFB1,ENO3,RAB5B,PKN1,MAP4K2,TAX1BP3,IL27RA,GCHFR,PRRC2A,ANXA7,S…	6.EryMeg	NormalvsGATA1s	3155
WP_VEGFAVEGFR2_SIGNALING	5.76604	7.06626036553517e-33	4.17862745901608e-31	428	TUBA1C,TMSB4X,VCL,MEF2C,ALDOA,PFN1,PTPN6,NR4A2,RHOC,SH3BGRL3,PPP1CA,CLIC1,IGFBP7,TXNIP,IQGAP1,CAPZB,ITGB1,ANXA1,PRKCB,RHOA,C15orf39,EIF4G2,ROCK2,NR4A1,LRRFIP2,TPM3,CSK,HERPUD1,NAPA,MYH9,DECR1,PRKCD,ATP6V0D1,GAPDH,FYN,ITGB3,STAM,EIF4G1,CFL1,STAT6,MAP3K5,STAT1,MKNK1,MMP14,PAK2,SDF2L1,SYNJ1,RAB37,YWHAE,STAT3,RAC1,AP2S1,FLII,BMP2,BCL2L1,HSPA1A,PSMD4,MOV10,FHOD1,PDE4DIP,P4HB,SLC25A11,HDAC5,PRKD1,BSG,C…	6.EryMeg	NormalvsGATA1s	3154
REACTOME_REGULATION_OF_EXPRESSION_OF_SLITS_AND_ROBOS	5.76348	1.45505245131196e-25	5.12151009041974e-24	172	RPS4X,RPS26,RPL7A,RPLP0,RPS3,RPL10,RPL19,RPL28,RPL12,RPS14,RPL18A,RPL6,RPL8,RPL29,PABPC1,RPS5,PSMB8,RBM8A,RPL18,RPL11,RPS15,RPSA,UBB,RPL41,RPS12,RPL36AL,RPS2,RPS7,RPLP1,PSMC5,PSMB5,RPL35A,PSMF1,PSME1,RPL30,PSMD8,RPL3,RPS8,RPL32,RPL5,RPL22L1,RPS27A,EIF4A3,RPS28,PSMD3,RPS13,PSMD4,PSMB6,RPL36,RPL10A,RPL13,EIF4G1,RPL15,PSMB10,PSMD6,PSMD2,FAU,RPS24,PSME2,RPS9,PSMD7,RNPS1,PSMA6,ELOC,ELOB,PSMC3,RPS3A,RP…	6.EryMeg	NormalvsTrisomy21	3005
CAIRO_HEPATOBLASTOMA_CLASSES_UP	5.76056	3.1371526503653e-26	1.87275464616207e-24	598	RPS3,MYCN,EIF4A1,LAPTM4B,RPLP0,ILF2,CLIC1,RPL28,SF3A1,APRT,IMPDH2,SLC25A3,RACK1,DDOST,RPL19,KDELR1,RAN,ERGIC3,EIF3F,RPS14,EEF1D,APEX1,RPL8,EIF3L,AHCY,RPL11,PHB2,LSM2,SRSF9,CCT7,RPN2,ENO1,PUF60,ADSL,TAF1D,TRIM28,SMARCB1,DDX27,NPM1,SNRPB,CPSF1,MRPS7,RPL18A,ATP5MC2,UBE2S,ATP6AP1,OXA1L,MAZ,RPL6,MYL6B,RPL18,TPI1,PLTP,VDAC2,STOML2,DNAJC4,PRDX6,SNX5,GMPR2,RTRAF,PTDSS1,DNMT3A,HSP90AB1,AP1G2,PYGL,MLST8,CC…	7.EMPP	NormalvsTrisomy21	2745
DACOSTA_UV_RESPONSE_VIA_ERCC3_UP	5.75824	1.16064152808401e-26	4.16380148200138e-25	309	IFITM2,SNHG29,GSTP1,MAT2A,ERGIC3,ICAM3,CCDC85B,GRHPR,LY6E,MAZ,PLTP,EEF1D,SHMT2,NR4A1,JUNB,UQCRC1,STK25,FLNA,EIF3I,ACAA1,PSMD8,UROS,PPP1CA,UROD,TST,RSL1D1,MRPS12,ARRB2,GLUL,RABAC1,BTBD2,ZFPL1,MRPL28,NDUFV1,UBA1,RPS15A,AAMP,FKBP1A,GET3,TFAM,ASL,TRIAP1,PPIE,RPN1,ZNHIT1,ECI1,ERCC1,TMED1,IDH2,SNRPA,CDC34,SMIM10L1,GCAT,BSG,RAB8A,CASP3,PPIF,CCND3,BUD23,SELENOW,ADA,SIGMAR1,EIF4EBP1,OGFR,ACOT2,SLC1A5,MEA1…	5.EryP	NormalvsTrisomy21	2835
REACTOME_RHO_GTPASE_EFFECTORS	5.75707	5.97566416714668e-29	2.03527301473731e-27	258	CYBA,FLNA,ACTR2,PRKCB,IQGAP1,RHOB,YWHAZ,PPP1CB,ARPC2,FMNL1,RHOC,CDC42,ITGB1,CTNNB1,TUBA1C,MYH9,WASF2,NCF4,PPP1R12A,ABI1,MRTFA,NCKAP1L,ARPC1B,CLASP2,ARPC3,NCOA2,CTNNA1,YWHAG,RANBP2,CLASP1,CENPC,WASL,ROCK2,PPP2R5A,DIAPH1,MYL6,KDM4C,PFN1,PAK2,PRKCD,YWHAH,CLIP1,KLC1,KIF5B,NCK1,MAPK1,PAFAH1B1,TUBA1A,PKN2,DYNC1LI2,ACTB,TAOK1,DYNC1I2,TUBB2A,GRB2,TUBB4B,ROCK1,RAC1,ARPC4,MAPRE1,ARPC5,DYNC1H1,PPP2CB,PIK3R4…	5.EryP	Trisomy21vsGATA1s	3615
WANG_TUMOR_INVASIVENESS_UP	5.75697	9.40657327258182e-28	3.545042917172e-26	379	RPS3,RPS14,IFITM2,RPL18A,RPLP0,RPL19,CIRBP,RPL6,HSPA8,ENO1,RPL28,VIM,GAPDH,RPL8,TKT,RPS5,TRIM28,PABPC1,HINT1,ERGIC3,AKR1A1,RPS7,PSMG1,TUBA1B,NACA,FKBP4,MRPL57,RPL32,IER2,PCBP1,RPL30,EID1,TUBB4B,RPS8,APH1A,IFITM1,NPM1,PKM,SRSF7,ATP5F1A,SNRPD2,NDUFB8,PSMC5,ARPC3,TUBB,CLTA,NDUFS2,PSPH,NHP2,RALY,GLUL,CD63,FAU,ACTG1,UBXN1,PRDX5,S100A6,SEC61B,DAZAP1,ASH2L,STAT5A,PSMD3,AP1G2,RPS15A,NFKBIA,PSMA7,PMPCA,HN…	5.EryP	NormalvsTrisomy21	2834
JIANG_MELANOMA_TRM5_CD8	5.75667	1.17505437259866e-24	3.87975917182797e-23	187	FTH1,GAPDH,CTSW,EIF4A1,HMGN1,ZFP36L2,CAPNS1,GSTP1,BHLHE40,ANXA1,PIM1,PKM,EIF1,ENO1,IL2RG,RGS1,NR4A1,PPP1R16B,CAPG,CITED2,NFKBIA,FOSL2,HSPA8,NR4A3,FTL,JUNB,TGFB1,PRDX6,LITAF,DNAJB1,ZFP36,TNFAIP3,LDHA,IER2,WBP1,AKAP13,SERTAD1,ZNRF1,BTG2,IFNAR1,CD82,TMEM256,MXD4,ODC1,EMD,CALM2,GCH1,RPL15,TNFAIP8,ANXA2,HERPUD1,SMAD7,UBE2S,CISH,CREM,ITGAE,HSP90AB1,NFKBIZ,ORAI1,ITM2B,PRR7,KDM6B,FOSB,MYH9,GPR132,WSB1,TE…	6.EryMeg	NormalvsTrisomy21	3004
TONKS_TARGETS_OF_RUNX1_RUNX1T1_FUSION_HSC_DN	5.75605	1.49845892506082e-29	7.39405129180674e-28	190	PDLIM1,LAT,GATA1,ITGA2B,TESC,FCER1A,PLP2,TYROBP,ACTN1,FCGR2A,S100A4,LDLRAD4,ANK1,CD36,NCF4,CCND3,LGALS1,BIN2,SH3BGRL3,DMTN,MYCN,SLC16A3,LAT2,XK,FLOT2,DOK2,FADS2,ZBTB16,NFE2,C15orf39,CD55,ITGA6,FAM30A,HBG1,LCP2,HDC,CBFA2T3,IL7,PRKCD,LAPTM5,APOBR,ABCC4,SELPLG,ELOVL6,SLA,SLC43A3,C11orf21,STK10,MBP,CSF1,TPM1,PIK3CB,CD33,SLC7A5,PTPN12,CAMK1,GSE1,ZNF787,LDLRAP1,HBD,RPS6KA1,PDXK,SETX,RMND5B,TFR2,TNFSF13…	6.EryMeg	NormalvsGATA1s	3153
MULLIGHAN_MLL_SIGNATURE_2_UP	5.7544	4.39453820339143e-28	1.79191497670529e-26	412	IGFBP7,LGALS1,PKM,ITGB2,SRGN,ENO1,ATP8B4,FES,LAT2,MAZ,PSMB8,SYNGR2,MAP2K2,PECAM1,PPIF,UQCRC1,CAPG,FOSL2,RAC2,MICAL1,CXCR4,ARPC2,CYBA,SEPHS2,ATP6V0E1,P4HB,C15orf39,NDUFB8,MALT1,PLIN3,ID2,LAMP1,RRP7A,LAPTM5,CTSA,NDUFC1,APBB1IP,CCND3,CTBS,MFSD1,RNF167,CAT,SYK,SLA,SPI1,SELPLG,TADA3,SERF2,SDF4,LAIR1,POLD4,SDHD,HCLS1,OAZ1,SMIM10L1,ECHDC2,AKR7A2,GRN,NKIRAS2,IL10RB,CEBPA,PPT1,EIF4E2,RNPEPL1,PYCARD,FLNA,H…	6.EryMeg	NormalvsTrisomy21	3003
LEE_DIFFERENTIATING_T_LYMPHOCYTE	5.75341	6.71320879500655e-25	3.76646346077736e-23	195	ZFP36L2,SELL,SRSF7,EIF4A1,ARHGDIB,GMFG,GABPB1-AS1,RCSD1,BTG1,CD52,CORO1A,ARHGAP9,ICAM2,ITM2A,SASH3,BTG2,AKAP13,ITGB2,RAC2,CXCR4,PNISR,ARHGAP25,TRBC2,EVL,SEPTIN6,LAPTM5,UCP2,SRSF6,AP1G2,BRD2,TBC1D10C,APBB1IP,MGAT4A,P2RY8,KLF13,UBE2G2,ARHGAP30,EVI2B,SELPLG,TSTD1,HCLS1,ING3,TMBIM4,SFPQ,ATF7IP2,NCKAP1L,FAM107B,NLRC3,TNFAIP8,TRAF3IP3,CCND3,SLA,TMC6,TMEM131L,PGGHG,PIK3CG,AKNA,METAP2,SMDT1,PRKCH,LAX1,FK…	7.EMPP	NormalvsTrisomy21	2744
REACTOME_SARS_COV_2_INFECTION	5.75232	3.53914770069464e-29	1.23184212524056e-27	283	GPC4,B2M,HLA-A,HLA-B,JAK1,STAT1,YWHAZ,HLA-C,TAB2,PTPN6,RPS10,UBC,G3BP2,CHMP4B,VCP,HSPG2,UVRAG,RPN1,TRAF6,FURIN,YWHAG,MAP1LC3B,RANBP2,DDX5,IRF7,ZDHHC20,GSK3B,SEC24B,YWHAH,MAGT1,CSNK1A1,MGAT5,NUP153,STAT2,TRAF3,CHMP3,CREBBP,ST3GAL2,RB1,RPS4Y1,IFNAR1,SRPK2,SDC4,PTPN11,ANO10,PIK3R4,SEC23A,PARP4,SNRPD3,IKBKG,ZDHHC3,ATG14,NUP214,PARP9,ZDHHC5,TBK1,MGAT4B,PARP6,ST3GAL3,SEC24A,NUP42,YWHAE,PARP14,MAVS,SEC2…	5.EryP	Trisomy21vsGATA1s	3614
BILANGES_SERUM_AND_RAPAMYCIN_SENSITIVE_GENES	5.75152	2.85351379537062e-25	9.25779127871981e-24	68	RPS4X,EEF2,RPL7A,RPS3,RPS14,RACK1,RPL18A,RPL10,EEF1A1,RPL6,NOP53,RPL28,EEF1G,RPL29,EEF1B2,RPL8,RPS5,RPL18,EIF3F,RPS7,RPL13,EIF3L,RPL32,RPL30,RPL5,RPS8,RPS13,RPS24,RPS3A,RPS27A,FAU,RPL24,SPRY2,RPS19,RPS9,RPL26,EIF3M,RPS23,RPL15,LTA4H,EXD2	5.EryP	NormalvsTrisomy21	2833
WANG_LMO4_TARGETS_DN	5.7475	9.54365913412223e-31	6.08591801706718e-29	347	AP3B1,PIK3CB,RABGEF1,PDZD8,ACSL3,NEAT1,IQGAP1,ATP6V0E1,U2AF1,FUT8,UBR4,ACTR2,CPEB2,TRIP12,PSAP,ATAD2B,ZNF407,EXOC4,TOP1,PDK3,NRBP1,USP47,MYLIP,PTS,USP8,TMOD3,WDR41,TDG,IRF9,COG5,RBM25,BAZ2B,ITCH,LXN,AKAP9,PAK2,ATP6V1H,SCFD1,RRN3,SRGAP1,CDR2,AFF4,EPC1,ARFGEF2,SNX4,FEZ2,PLEKHB2,RNFT1,GGNBP2,CAPZA2,HLA-B,BCAP29,CLPTM1,SH3GLB1,DYNC1LI2,C17orf49,INSR,DYNC1H1,CDC37L1,MACC1,WASL,EIF5B,B2M,MTMR2,OSTM1,GP…	7.EMPP	NormalvsGATA1s	3062
REACTOME_INTRA_GOLGI_AND_RETROGRADE_GOLGI_TO_ER_TRAFFIC	5.74668	9.90473822501975e-27	3.80872923498182e-25	199	KIFAP3,NBAS,RHOBTB3,VTI1A,MAN2A1,TUBA1C,AGPAT3,COG5,CAPZA1,USP6NL,RIC1,RAB6A,RAB3GAP2,TUBB1,GALNT1,KIF20B,KIF13B,TGOLN2,CUX1,KIF5B,GOLGA4,RAB1A,NSF,CAPZB,RAB3GAP1,MAN1A2,RAB18,GBF1,STX5,MAN1A1,DCTN4,PLA2G4A,COPA,CAPZA2,GOLIM4,NAPG,PAFAH1B1,KLC1,KIF2A,ARF4,ARFGAP1,ARF3,ARFGAP3,DYNC1I2,VPS54,TMED7,STX18,TUBB2A,VPS53,DCTN1,STX16,PAFAH1B2,MAN2A2,COPG1,COG6,DYNC1LI2,GOLGA1,TMF1,DYNC1I1,NAPA,DYNC1H1,RI…	7.EMPP	Trisomy21vsGATA1s	3171
DANG_BOUND_BY_MYC	5.74622	1.01267445626769e-45	1.25757289560843e-43	1010	TGFB1,ASAH1,MEIS2,TAGLN2,OAZ1,ZFP36L1,CYBA,SNX3,CD63,GSTP1,PFN1,MSN,PAPPA,PTPN6,CD164,GPSM3,NID1,ILK,UROD,XK,LMNA,PSAP,FLOT2,ITGB1,PKM,VCP,IER2,ITGA6,ATP5PO,ATP5F1E,PDCD10,CTSC,RAB8A,RAC2,SYK,PMVK,POLD4,HERPUD1,UBAC1,SOD1,SQSTM1,CTDSP1,NFIL3,LAMP1,IFNAR1,GAPDH,ARPC4,VASP,TCIRG1,ABCC4,CMAS,YWHAH,PDK3,SRSF5,STAT6,MAP3K5,HSPA8,M6PR,MKNK1,RGL2,GMIP,PRDX5,SLA,BAX,SDF2L1,FXN,NDUFB2,SERTAD1,ADGRE5,SCAND…	6.EryMeg	NormalvsGATA1s	3152
IVANOVA_HEMATOPOIESIS_LATE_PROGENITOR	5.74506	8.08725850991916e-32	5.43594916599161e-30	501	HDC,RABGAP1L,TYROBP,PRKAR2B,PACSIN2,NCOA4,BMP2K,GALNT10,ATP6V0E1,SLC25A21,HCST,MAP2K4,NPTN,SPTLC2,SEMA4D,UGGT1,PPP2CB,GMIP,HECTD4,ORC4,ATP9B,CTSC,GBE1,BSG,PSTPIP2,MAP2K1,SLC39A3,NAPG,RNF130,TMEM50B,UBE2Q1,NAPA,AGPS,ABHD5,OSTF1,USP14,GPR89A,TFRC,STX11,PLEK,ANXA2,R3HCC1L,CA1,PIEZO1,MRPS6,RNF115,SSH1,MOB3A,GGNBP2,SOAT1,FNDC3B,SGK3,DOK3,CEMIP2,TNFAIP8L2,AP3S1,BCAP29,CD33,TANGO2,CPOX,CDC37L1,UMAD1,ANK…	7.EMPP	NormalvsGATA1s	3061
HALLMARK_MITOTIC_SPINDLE	5.74153	1.6322016263541e-27	6.95970773477388e-26	199	PDLIM5,VCL,FLNA,KIFAP3,GSN,CAPZB,CDC42BPA,CLIP2,RANBP9,EPB41,MYH9,NET1,MID1,CDC42,PREX1,ARHGAP10,WASF2,ITSN1,APC,ABI1,ACTN4,ARHGEF7,BCL2L11,CKAP5,ARHGAP4,YWHAE,HDAC6,TBCD,FGD4,OPHN1,MAP3K11,NUMA1,KATNA1,RASA1,WASL,MAPRE1,SUN2,CENPJ,FARP1,CDC42EP4,DOCK2,HOOK3,SMC1A,KIF5B,CEP192,TUBGCP3,BUB1,ECT2,KLC1,ATG4B,PCM1,MID1IP1,SSH2,RAPGEF6,CYTH2,TUBGCP2,BRCA2,KIF20B,SASS6,ARF6,CLIP1,RAB3GAP1,CENPE,CLASP1,…	6.EryMeg	Trisomy21vsGATA1s	3041
PATIL_LIVER_CANCER	5.73613	5.10089269631085e-34	2.83975071003574e-32	628	MTSS1,MIR4435-2HG,STK24,VPS50,RHOBTB3,TIMP1,PTBP3,FADS2,MAP4K4,CD46,GABRE,IGF2BP1,YWHAZ,SESTD1,NCOA3,SOS1,TP53BP2,PLP2,PPP2R5A,NCOA2,XPR1,ANKRD27,TBC1D5,CTSA,LYZ,TRIM24,E2F3,S100A10,CCDC88A,TXNRD1,CREB3L2,ARNT,CPQ,PHF21A,ASAP1,CDC42SE1,BLZF1,RAB3GAP2,ACACA,DIDO1,CEP192,WNK1,RHOC,KIF20B,UBE2Q1,ARFGEF1,MPZL1,CCDC14,EZH2,LMTK2,PIR,CEP85,PRRC2C,OGT,HNRNPA2B1,SUCO,ARID3A,NEDD4L,BSG,LAMP2,ARL4A,PRIM2,T…	7.EMPP	Trisomy21vsGATA1s	3170
MULLIGHAN_NPM1_SIGNATURE_3_UP	5.73505	3.72382031747467e-28	1.50976628088919e-26	316	PDLIM5,KYNU,CD84,MAP3K5,LIMS1,RSRC1,TOP1,NCOA3,ABHD2,RSRP1,CAVIN2,TXNIP,ERP44,NIPBL,TFDP2,TANK,UGGT1,RBM25,WWP1,FRY,CTBP2,UBE2K,WNK1,NFE2,MSH3,ZMYM2,IL15,PTPN11,NFE2L2,HSD17B4,TRAF6,CLN8,IDE,VCP,CNOT4,PKN2,SSX2IP,SP3,PLA2G4A,PDS5B,MTCL1,PTPN4,YME1L1,AP3S2,MLLT10,STAG2,MBNL2,PKNOX1,LGR4,OSTF1,ARHGEF11,ZBTB43,ACO1,SMC4,CELF1,ST3GAL2,NIPA2,TJP2,YWHAB,TST,SH3GL1,CEP104,TRIM38,MAN2A2,NEK7,RBM5,SPG7,IP…	7.EMPP	Trisomy21vsGATA1s	3169
MULLIGHAN_NPM1_SIGNATURE_3_UP	5.73042	8.19367702456815e-29	3.79759117747376e-27	316	PDLIM5,KYNU,LIMS1,CD84,MAP3K5,CAVIN2,TXNIP,RSRP1,ABHD2,NFE2,OSTF1,ARL6IP4,VCP,RSRC1,YWHAB,ERP44,BAX,NCOA3,RTN2,HSD17B4,MAFG,UGGT1,IL15,CLN8,CEP104,TJP2,TFDP2,TRAF6,PKNOX1,TOP1,TST,IDE,FRY,WWP1,TRAF3IP3,NFE2L2,PURA,ACO1,RAB38,CREG1,RER1,WNK1,GP6,ST3GAL2,AP5Z1,MSH3,MTCL1,TVP23B,UBE2K,RTL8C,PDE3A,TRAPPC3,FKBP1B,PLOD1,ARFIP1,ASRGL1,LGR4,RASSF7,ZBTB43,LHFPL6,TRIM38,DPEP2,PPP1R26,SH3BP2,SH3GL1,RBM25,B4…	6.EryMeg	Trisomy21vsGATA1s	3040
YAGI_AML_WITH_T_8_21_TRANSLOCATION	5.72918	3.6873492661307e-31	1.46297543489728e-29	361	IL1RAP,IL2RG,U2AF1,LIMS1,MPL,MACF1,LAMA5,BSG,TFPI,PLP2,EPB41,JAK1,ITM2B,CCND3,SMG1,S100A4,TGOLN2,ELF4,AP3B1,ANKRD28,GNAS,ZNF273,GLS,REL,FCGR2A,CALR,MAGED2,PNRC1,STAT5B,CD68,TMBIM6,ELMO1,NFKB1,NT5C2,TXNRD1,CEP170,STK10,FURIN,NBAS,LAPTM5,PTPRCAP,CDKN2D,MED21,PTPN12,SIPA1L1,TLE5,ETV6,SH3GLB1,TSC22D4,ABCC1,RUNX1T1,LGALS1,PIK3R1,JAK3,ADRM1,CD2AP,PRKCD,PLXND1,HEXA,TCEA2,JUP,NUMA1,NCK1,CSK,KDM3B,RGS10,O…	5.EryP	Trisomy21vsGATA1s	3613
GARY_CD5_TARGETS_UP	5.72849	7.80744625610566e-30	3.46687792086597e-28	455	SLC2A3,LRBA,TGFB1,CD55,ZFP36L1,MALAT1,IL2RG,NEAT1,RSRC1,TLN1,ZFAND3,SESTD1,NFAT5,NCOA3,USP47,STAT1,PJA2,DDX17,PDK1,AUH,CAB39,FNIP1,BRAF,MEF2A,NBEAL2,TNFSF9,SDCBP,STK4,ANKRD11,STAT5B,TAOK1,SGPP1,FYN,ASAP1,CTNNA1,SECISBP2L,MICU1,LTN1,GBE1,IFRD1,WNK1,NLK,KPNA1,PPP2R5C,R3HDM2,SQSTM1,ZMYM2,GSK3B,PIM2,RBM39,PKN2,TUBGCP3,PLEK,IRF9,WAC,SLC25A37,VMP1,UHMK1,CDC42,WDR33,MKRN1,BTBD7,SLC7A11,PDCD4,P4HA1,SUCLG…	7.EMPP	Trisomy21vsGATA1s	3168
BLANCO_MELO_BRONCHIAL_EPITHELIAL_CELLS_INFLUENZA_A_DEL_NS1_INFECTION_UP	5.72848	5.15520248115332e-37	2.82626394849111e-35	621	DLC1,HSH2D,HLA-B,C15orf39,RASGEF1B,B2M,ZFP36,TNFSF9,IER2,ETS2,NFKBIA,HLA-A,RHOB,STAT5A,KLF10,KLF2,CD83,STAT1,CITED2,DUSP1,SWT1,JUNB,CLIC2,HLA-C,FYB1,PTGS1,MEF2C,IRF9,ADAM8,CDKN1C,DDX3X,SP100,CSRNP1,LY6E,RABGAP1L,CSF1,LYN,JUN,DUSP2,NFATC1,MORC3,IRF7,MAP3K11,STX11,FHL3,UNC93B1,ICAM1,MAFF,RIPK1,NFKB2,TICAM1,NFKB1,CAVIN2,NFKBID,ADAR,IRF1,TNIP1,GNB4,BIRC2,PHACTR4,ZNF267,IFRD1,IFITM2,STAT2,XBP1,TRIM26,…	5.EryP	NormalvsGATA1s	3586
RICKMAN_METASTASIS_DN	5.72843	1.5947683329835e-29	6.16092885529792e-28	248	PDLIM1,RNH1,S100A11,STXBP2,C15orf39,TAGLN2,BSG,TNFSF9,TRAPPC1,JPT1,SH3BGRL3,LMNA,SPI1,FLOT2,FCER1G,GNA15,DOK2,TSPAN14,DNM2,LCP2,ABHD17A,EHBP1L1,SGMS1,PKM,VASP,MORC3,SCAMP2,JUP,SLC16A3,ARPC5,DMTN,KLF13,OSTF1,MOB3A,ALDH16A1,ARF1,R3HDM4,PTK2B,MYO1G,ZBTB7A,PTGS2,CCM2,SH3GL1,FAM53B,TMEM259,GET3,NAA80,ZDHHC12,MKNK2,RHOA,S100A6,MUC1,RASSF5,FZR1,MIER2,KCNK1,MYD88,PGAM1,RALGDS,RNF19B,ITGB4,CAP1,TYMP,CD58,…	5.EryP	NormalvsGATA1s	3585
CONCANNON_APOPTOSIS_BY_EPOXOMICIN_UP	5.72821	1.73967263161397e-27	5.34000747292534e-26	231	KLF6,AKR1C1,DNAJB6,NEAT1,TNFSF9,SQSTM1,LMNA,EPB41,ELL2,DHRS3,SMG1,SLC7A5,UBR4,UBE2H,GLS,TGFBR2,FOS,MIR22HG,SERPINE1,MAP1LC3B,ZFP36,SNRK,PPP1R15A,ATF3,SERPINH1,INPP5D,NUCB1,DUSP1,GABARAPL1,PRDM2,ADRM1,ACADVL,SLC16A3,STK17A,RAB21,KCTD20,DDIT3,PLD3,PSMD1,PCYT1A,KIF1B,STX16,ZNF10,MXD1,CCNT2,IFRD1,EIF5,TNKS,BBC3,MAP1A,LPXN,ZFR,DYNC1H1,TOM1,NQO2,ATP2B4,ANXA2,BCL2L11,SLC7A11,TMF1,HSPA1A,CDK11B,DNAJB1,MD…	5.EryP	Trisomy21vsGATA1s	3612
REACTOME_ADAPTIVE_IMMUNE_SYSTEM	5.7282	3.76665104667563e-36	2.34160140068335e-34	808	HERC2,DNM3,PRKN,LAT,CD36,KIFAP3,LYN,ZBTB16,FYB1,PIK3CB,PTPRC,RNF182,PRKCB,YES1,ITGB1,CLTC,TYROBP,UBR4,TRIP12,YWHAZ,HSPA5,CD4,PRKCQ,SOS1,PPP3R1,PDIA3,PJA2,PIK3CA,UBR1,ITCH,AP1G1,LCP2,LNPEP,AREL1,TUBA1C,TPP2,FBXW7,PPP2R5A,STIM1,ITPR2,PTEN,HERC1,SMURF1,UBA6,CYBA,CTSA,PSMD1,AP2B1,RICTOR,UBE2E1,CAPZA1,ITPR1,FBXL20,RNF19A,PSME4,NPEPPS,KLHL2,HECTD1,WWP1,DNM2,FYN,HUWE1,PPP3CA,CUL3,CBLB,GRB2,KRAS,TUBB1,NF…	7.EMPP	Trisomy21vsGATA1s	3167
CREIGHTON_ENDOCRINE_THERAPY_RESISTANCE_5	5.72648	1.04748539350287e-32	4.46468202865023e-31	476	APLP2,ASAH1,EPB41L4A,CD55,ATP2A3,NFAT5,YPEL5,NDFIP1,ELL2,PPP1CB,MBNL1,CTNNB1,MYH9,RAB2A,ATP2B1,RNF19A,CPEB2,CTNND1,VMP1,CLTC,QKI,EZR,CAB39,RAB1A,KLF7,AP1G1,SEL1L,RIPOR3,NET1,TMEM131L,ZFP36,ZBTB20,KRAS,CLIC1,RICTOR,BRWD1,MAPK6,RIOK3,MACO1,DAG1,AREL1,ATP2B1-AS1,HIGD1A,NCOA1,NUDT4,MEF2A,TMCO3,IER2,DCAF5,PSEN1,KLF9,VPS13B,GSN,MALT1,GALNT10,ARF4,NF1,ZNF827,FUCA1,DIDO1,STRN3,CHMP3,PDE8A,PCYT1A,PDXK,LPI…	5.EryP	Trisomy21vsGATA1s	3611
BENPORATH_MYC_MAX_TARGETS	5.72482	1.43602618861457e-39	1.27378942040085e-37	738	ASAH1,TMSB4X,TAGLN2,OAZ1,CYBA,SNX3,PFN1,PTPN6,CD164,GPSM3,ILK,XK,FLOT2,PKM,VCP,IER2,ATP5F1E,PDCD10,CTSC,RAB8A,RAC2,SYK,PMVK,POLD4,STOM,SOD1,SQSTM1,LAMP1,IFNAR1,ARPC4,VASP,ABCC4,YWHAH,FTH1,PDK3,SRSF5,MAP3K5,M6PR,MKNK1,RGL2,GMIP,PRDX5,PDK1,SDF2L1,NDUFB2,SERTAD1,ADGRE5,SCAND1,DDX17,EIF4E2,RNFT1,VPS29,ACTR3,TRIM24,THRAP3,SPTLC2,ABT1,MOCS2,ACAD8,ARL6IP5,PSMD8,ETFA,RABGEF1,ASH2L,CYB561D2,PCMT1,RRAS,HLA…	6.EryMeg	NormalvsGATA1s	3151
KEGG_UBIQUITIN_MEDIATED_PROTEOLYSIS	5.7242	4.31597813531407e-27	2.19057910663798e-25	132	HERC2,PRKN,TRIP12,MID1,UBE2E1,WWP1,UBE2Q1,WWP2,ITCH,UBE2Q2,UBE2F,BIRC2,SMURF1,HERC3,HUWE1,TRAF6,PPIL2,CUL5,NEDD4L,MAP3K1,SIAH1,RCHY1,BIRC6,UBE2G2,CBLB,UBE2D1,FBXW7,UBE2W,CDC16,CUL2,SMURF2,UBA6,PML,UBE2A,ELOC,FBXW8,PIAS1,MDM2,KLHL9,ERCC8,UBE2G1,FANCL,MGRN1,CUL4A,FZR1,ANAPC2,UBA7,BIRC3,CDC34,BTRC,SYVN1,UBE3A,UBA3,HERC4,KEAP1,PIAS4,PIAS2,HERC1,CUL4B,RHOBTB2,NEDD4,CUL7,CDC23,UBOX5,COP1,UBE4A,UBE2D4,U…	7.EMPP	NormalvsGATA1s	3060
TONKS_TARGETS_OF_RUNX1_RUNX1T1_FUSION_HSC_DN	5.72353	4.26937871806455e-26	2.04191247535125e-24	190	ITGA2B,LDLRAD4,PDLIM1,ANK1,GATA1,LAT,HDC,CD36,ABCC4,FCER1A,ACTN1,CD55,ZBTB16,TESC,TYROBP,CBFA2T3,PLP2,FCGR2A,PIK3CB,SLC7A5,LCP2,GSE1,NCF4,IL7,XK,FADS2,LGALS1,DMTN,SLC16A3,APOBR,PTPN12,ITGA6,NFE2,ELOVL6,BIN2,MYCN,CCND3,DOK2,C15orf39,PRKCD,CSF1,SELPLG,STK10,HBG1,FLOT2,SLC43A3,SETX,TSC22D1,MBP,C11orf21,CD33,TPM1,CRCP,LAT2,FAM30A,KCNK5,TFR2,CFLAR,LDLRAP1,S100A4,GSR,PDXK,TRAF4,RMND5B,XYLT1,PTPN22,EGR3…	7.EMPP	NormalvsGATA1s	3059
DUTERTRE_ESTRADIOL_RESPONSE_24HR_DN	5.72343	2.77389139196578e-31	1.36139669632005e-29	496	PDLIM5,KYNU,LDLRAD4,PDLIM1,MBOAT2,ARL15,CD55,MAP3K5,ZFP36L1,CDC42BPA,ROCK2,SMAD3,MAP4K4,CD46,EPB41,FNBP1L,RPS6KC1,TP53INP1,CPEB4,GALNT10,LMBRD1,KDM6A,ACSL3,CPEB2,TBC1D23,PNPLA8,ARHGAP12,CAB39,QKI,PTPN12,KLF6,WWC2,TFPI,FCHO2,RIPOR3,MYH9,EVI5,DBN1,BAZ2B,RNF19A,S100A10,CITED2,TGFBR2,TAX1BP1,CREB3L2,SH3BGRL2,ATP2B1,SENP2,STAM2,CBLB,MID1,CDKN2A,LIPH,SOS2,CTSH,RHOC,DOCK11,TACC1,ZNF217,GOLGA4,SQSTM1,YPE…	7.EMPP	Trisomy21vsGATA1s	3166
WANG_TUMOR_INVASIVENESS_DN	5.72321	1.05237521611047e-28	3.52002992689147e-27	206	RHAG,APLP2,IGF2BP1,CELF2,ACTR2,MSN,B2M,IQGAP1,RSRP1,DHRS3,TPM3,ITM2B,YWHAZ,PPP1CB,CD9,GNAI2,TGOLN2,WDR26,UBE2H,BNIP3L,PPP1R12A,CTNND1,B4GALT1,MYEF2,ATP6V1A,NUFIP2,FURIN,ESYT1,BIRC6,DLG1,CORO1C,MYADM,KBTBD2,GSK3B,GNB1,RNF4,AP2A2,PRKCD,ARF1,RYK,PLAA,MAP3K1,DYNC1LI2,SPIN1,NRAS,WDR1,BTG2,NPC1,ANKRD13A,PBXIP1,TMED5,ZC3H7A,WDFY1,RLIM,SMG7,LY6E,YME1L1,MIA3,NAA35,MYSM1,STX8,CD53,PPP2R5C,CSAD,TTBK2,MRTFB,…	5.EryP	Trisomy21vsGATA1s	3610
REACTOME_MYD88_INDEPENDENT_TLR4_CASCADE	5.7229	2.56516212087127e-27	7.8096099018689e-26	108	TAB2,NFKBIA,MAP3K8,UBC,MEF2C,FOS,NFKB1,TRAF6,CREB1,MAP2K4,MAPKAPK2,TANK,USP14,MEF2A,TICAM1,IRF7,MAP2K1,MAP2K3,MAPK8,RIPK1,ATF2,NFKB2,BIRC2,MAPK1,TRAF3,FBXW11,CASP8,MAPKAPK3,PTPN11,PPP2CB,MAPK14,IKBKG,ALPK1,N4BP1,TBK1,PPP2CA,UBE2D1,TNIP2,NKIRAS1,ELK1,JUN,BIRC3,UBE2D3,BTRC,VRK3,NLRC5,DUSP3,CHUK,TAB3,IRF3,UBE2D2,NOD1,MAP3K7,NKIRAS2,RELA,MAP2K7,RPS6KA2,IRAK2,IKBKB,PPP2R1B,MAPK11,UBE2V1,RIPK3,TICAM2,A…	5.EryP	Trisomy21vsGATA1s	3609
MARTENS_BOUND_BY_PML_RARA_FUSION	5.72197	1.5067523020783e-30	7.06941646132334e-29	439	APLP2,STK24,CHD7,LYN,ZBTB16,SMAD3,TESC,TYROBP,GSE1,SPN,WDR26,ABHD2,AUH,LCP2,STXBP2,SLC7A5,TUBA1C,ITPR2,RUNX1,PTEN,MYH9,ARID2,CD164,PREX1,B4GALT1,ITPR1,ANKRD11,DNM2,MYO1F,LMBR1,BABAM2,FOSB,TBXAS1,PRKCD,GBE1,CELF2,EDRF1,CCND3,NFE2,CUX1,PDE4DIP,SMG6,SQSTM1,PSAP,ELF4,GGA1,FAM53B,OAZ1,PLEK,RAP1GAP2,ARID3B,DCTN4,GALC,APBB1IP,GPATCH8,SREBF1,UBN2,C11orf21,WDR81,LASP1,CD58,MFSD8,ELL,HIVEP2,CTCF,ZMIZ1,ZZEF…	7.EMPP	Trisomy21vsGATA1s	3165
GRAESSMANN_RESPONSE_TO_MC_AND_DOXORUBICIN_DN	5.71775	1.55430255944449e-35	1.18333177510361e-33	758	PRMT2,PLP2,YES1,MSN,TXNIP,PTBP3,RUNX1,CNOT2,NUMB,DBN1,FOXN2,SRSF7,VTI1A,RIPK1,HPS1,FER,GRTP1,ZNF644,STAM2,ACIN1,YWHAZ,SLC39A3,CHD4,MSH3,ERC1,AP1G1,CCL5,ATE1,IBTK,CDC73,TFRC,DPH6,ZNF292,SRSF6,NORAD,FXN,DNAJB12,NFYC,TRAF6,SPIN1,STK3,STAT5A,LMBR1,BNIP3L,LANCL2,RHBDD1,SOCS6,TAOK1,STAT5B,MGA,KRI1,LUC7L2,XPR1,SLC39A11,OPA3,LRRC8C,RLIM,TPK1,CSNK1D,USP4,PLSCR1,COX17,PBX2,KMT5B,TPM3,HIBCH,MTAP,TOM1L1,TSEN…	7.EMPP	NormalvsGATA1s	3058
REACTOME_CELLULAR_RESPONSES_TO_STIMULI	5.71736	6.20852609041066e-28	4.09982492802163e-26	750	RPS4X,AREG,RPS26,RPS3,ETS2,RPL7A,TKT,RPLP0,GSTP1,CCS,EEF1A1,RPL28,RPL10,IGFBP7,TUBA1B,PGD,DNAJB1,UBB,RPL19,CEBPB,LAMTOR1,HSPA8,RPS14,JUN,FOS,RPL8,PSMB8,RPL11,PHB2,NCF4,SOD1,SERP1,MAPKAPK3,ATP6V0C,RPS5,DNAJB6,ATP6V1G1,TUBB4B,PRDX3,PSME1,RPL18A,UBE2S,MYC,RPL36AL,RPL6,TINF2,RPS15,ATP6V0E1,RPL18,STAT3,VCP,STOML2,TALDO1,RPL29,NRIP1,TUBA1C,RPS2,HERPUD1,PRDX6,TXN2,NFYC,HSP90AB1,CITED2,RPSA,CDK6,KDM6B,PS…	7.EMPP	NormalvsTrisomy21	2743
WIERENGA_STAT5A_TARGETS_DN	5.71694	1.02430678547754e-26	4.13155526120725e-25	188	GP9,GP1BB,PDLIM1,RBPMS2,LDLRAD4,FCER1A,ACTN1,TLN1,RUFY1,CD9,SLC37A1,RGS18,FCER1G,PLXDC2,SPX,LYZ,CD84,SLC9A9,CAVIN2,GJA4,ILK,ROCK2,SLC22A23,PROS1,MPL,EFHC2,CLCN4,GCSAML,GP1BA,FAM30A,CTDSPL,IL7,USP20,ALOX12,STX11,PSTPIP2,PLCG2,FERMT3,DOK3,PECAM1,ARHGAP21,DAAM1,NINJ2,SCPEP1,SUSD3,BANK1,CAMK1,ANGPT1,SH3BGRL2,MYLK,RASGRP3,PDIA5,GNG11,PLEK,EFNB2,DNAAF3,OGFRL1,BAMBI,ETS1,ZFPM1,TSPAN32,PPIF,SERPINF1,CARD…	6.EryMeg	Trisomy21vsGATA1s	3039
ONKEN_UVEAL_MELANOMA_DN	5.71551	2.94605265445882e-25	1.70414301609083e-23	511	CIRBP,TKT,NR4A3,GSTP1,RPL28,BTG1,PGD,IMPDH2,DDOST,DAZAP2,ITM2A,SPRY1,RPS14,ADH5,EIF1AX,GNAS,EIF3L,RPL11,ID2,ERP29,RNF7,SERP1,DDX3X,ETHE1,PIK3R1,PDE4B,RPS5,EIF3G,SLC25A6,CMTM6,NPM1,BEX4,RPL18A,RPL36AL,UQCRC1,ZNF22,RPL29,NRIP1,DNAJC4,GYPC,GMPR2,ZNF593,NFYC,CRTAP,HSP90AB1,RPSA,CTSF,NDN,SPRY2,AP2M1,HADHA,DALRD3,GALC,CD200,VAMP8,ALDH9A1,EIF4G1,NOL7,PLSCR1,RPL5,AGPAT2,GSTM1,LAMP1,SLC41A3,NIPSNAP1,ING3,…	7.EMPP	NormalvsTrisomy21	2742
JOHNSTONE_PARVB_TARGETS_3_UP	5.71373	1.65836871304741e-30	1.02256933620221e-28	424	FLNA,ASAH1,APLP2,CYTOR,CD55,ANXA1,TIMP1,CTSA,TXNIP,ATXN7,CITED2,CST3,NEAT1,OSBPL3,IQGAP1,TNIK,FUT8,PLD1,JAK1,SMAD3,ELOVL6,MYH9,PSAP,NDFIP1,CAPN1,TGFBR2,CD9,EIF4G1,COL18A1,TMEM245,C15orf39,TAX1BP1,RHOB,GSN,MAP4,F11R,CSF1,WIPF2,AHNAK,P4HB,AKR1C1,LMTK2,FLOT2,PRPF8,TNKS2,SQSTM1,WASHC2C,DAG1,PAK2,TCIRG1,SMURF1,CD58,PYGL,HSD17B4,HUWE1,PPP1R21,CALM1,GRN,EHD1,ARFGAP1,THBS1,MGAT4B,STAT6,SGK3,HLA-B,UGCG,JA…	7.EMPP	NormalvsGATA1s	3057
[truncated: 28,175 more rows]

## Sheet: Table S3
Table S3. Differential Gene Expression and Essentiality Gene Scores
[truncated: 2,375 more rows]

## Sheet: Table S4
Table S4. Differential Gene Expression TF1 cell line model
[truncated: 14,569 more rows]

[truncated: 2 more sheets: Table S5, Table S6]
